# Supplementary material for: Rh-Catalyzed oxidative homo-coupling cyclization of 2,3-allenols to conjugated furylenones
Source: Royal Society of Chemistry journal article supplement (doi:10.1039/d1qo00599e), 2021-01-01

## Rh-Catalyzed Oxidative Homo-coupling Cyclization of 2,3-Allenols to Conjugated Furylenones

Xiaoyan Wu , Junjie Fan, Xin Huang and Shengming Ma\*

*Laboratory of Molecular Recognition and Synthesis, Department of Chemistry, Zhejiang  
University, Hangzhou 310027, Zhejiang, P. R. China.*

E-mail: [masm@sioc.ac.cn](mailto:masm@sioc.ac.cn)

### Supporting Information

#### Table of Contents

|                                                                                    |          |
|------------------------------------------------------------------------------------|----------|
| General Information                                                                | S2       |
| Synthesis of New Starting Materials                                                | S3-S6    |
| Rh(III)-Catalyzed Oxidative Homo-coupling Cyclization of<br>2,3-Allenols           | S7-S33   |
| Synthetic Applications                                                             | S35-S42  |
| Mechanistic Studies                                                                | S43-S49  |
| References                                                                         | S50      |
| <sup>1</sup> H NMR, <sup>13</sup> C NMR and HPLC Spectra of the Compounds Prepared | S51-S207 |

## General Information

$^1\text{H}$  NMR,  $^{13}\text{C}$  NMR, and  $^{19}\text{F}$  NMR spectra were recorded in  $\text{CDCl}_3$  using a Bruker AM 300 MHz NMR spectrometer ( $^1\text{H}$  at 300 MHz,  $^{13}\text{C}$  at 75 MHz,  $^{19}\text{F}$  at 282 MHz). All  $^1\text{H}$  NMR spectra were measured with TMS (0 ppm) in  $\text{CDCl}_3$ . All  $^{19}\text{F}$  NMR spectra were measured with  $\text{CFCl}_3$  (0 ppm) as the internal standard, respectively. All  $^{13}\text{C}$  NMR spectra were recorded in relative to the signal of  $\text{CDCl}_3$  (77.0 ppm). IR spectra were recorded with a Perkin–Elmer 983G instrument. Elemental analyses were conducted with a Carlo-Erba EA1110 elementary analysis instrument. Mass spectrometry was performed with an HP 5989A system. High-resolution mass spectrometry was determined with a Finnigan MAT 8430 or Bruker APEXIII instrument.  $[\text{Cp}^*\text{RhCl}_2]_2$  was purchased from *Strem* and *HWRK CHEM*. The range of boiling point of the petroleum ether used for chromatography was 60-90 °C unless noted otherwise. Other commercially available chemicals were purchased and used without additional purification unless noted otherwise. Optically active propargylic alcohols (*R*)-**3** or (*S*)-**3** were prepared via Novozym-435-catalyzed enzymatic kinetic resolution.<sup>1</sup> Optically active or racemic 2,3-allenols were prepared according to the literature procedures.<sup>2</sup>



2. Synthesis of (*S*)-1-(3-bromophenyl)buta-2,3-dien-1-ol (**S-1e**).<sup>2</sup> (wxy-3-104)

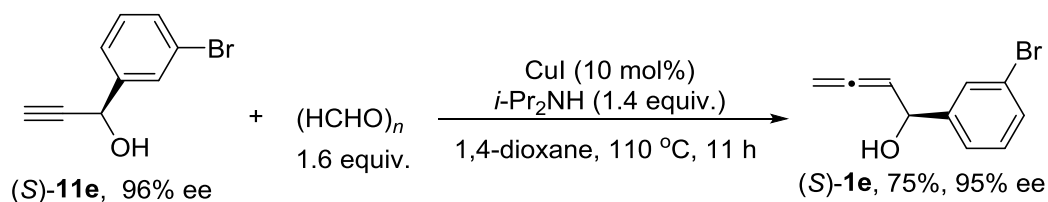

Following **Typical Procedure I**, the reaction of CuI (80.1 mg, 0.4 mmol), (*S*)-**11e** (723.6 mg, 3.4 mmol, 96% ee), paraformaldehyde (490.1 mg, 5.4 mmol), and *i*-Pr<sub>2</sub>NH (0.68 mL, d = 0.716 g/mL, 486.9 mg, 4.8 mmol) in dioxane (1.7 mL) afforded (*S*)-**1e** (576.4 mg, 75%) as an oil: 95% ee (HPLC conditions: Chiralcel OD-H column, *n*-hexane/*i*-PrOH = 95/5, 0.5 mL/min,  $\lambda$  = 254 nm,  $t_{\text{R}}(\text{minor})$  = 10.3 min,  $t_{\text{R}}(\text{major})$  = 11.4 min);  $[\alpha]_{\text{D}}^{20}$  = +38.5 ( $c$  = 1.40, CHCl<sub>3</sub>); <sup>1</sup>H NMR (300 MHz, CDCl<sub>3</sub>)  $\delta$  7.52 (t,  $J$  = 1.7 Hz, 1 H, ArH), 7.39 (dt,  $J_1$  = 7.8 Hz,  $J_2$  = 1.7 Hz, 1 H, ArH), 7.32-7.24 (m, 1 H, ArH), 7.19 (t,  $J$  = 7.7 Hz, 1 H, ArH), 5.36 (q,  $J$  = 6.5 Hz, 1 H, OCH), 5.23-5.13 (m, 1 H, =CH), 4.98-4.85 (m, 2 H, =CH<sub>2</sub>), 2.76 (d,  $J$  = 4.2 Hz, 1 H, OH); <sup>13</sup>C NMR (75 MHz, CDCl<sub>3</sub>)  $\delta$  207.1, 144.9, 130.7, 130.0, 129.1, 124.6, 122.4, 94.6, 78.4, 71.2; IR (neat)  $\nu$  (cm<sup>-1</sup>) 3389, 3062, 2876, 1954, 1594, 1570, 1474, 1427, 1186, 1093, 1071, 1034; MS (EI):  $m/z$  (%) 225 [(M(<sup>81</sup>Br)<sup>+</sup>, 2.39], 223 [(M(<sup>79</sup>Br)<sup>+</sup>, 2.66], 77 (100); HRMS Calcd for C<sub>10</sub>H<sub>8</sub><sup>79</sup>BrO (M-H)<sup>-</sup>: 222.9764; Found: 222.9764.

3. Synthesis of (*S*)-1-(furan-2-yl)buta-2,3-dien-1-ol (**S-1j**).<sup>2</sup> (wxy-3-114)

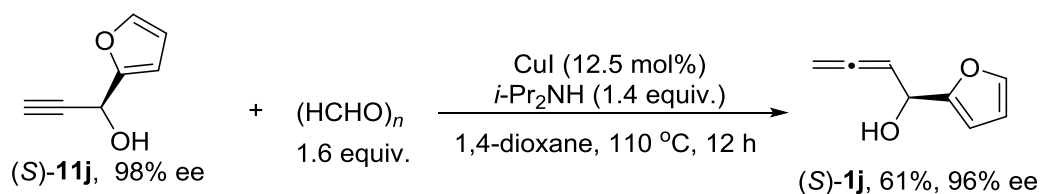

Following **Typical Procedure I**, the reaction of CuI (119.2 mg, 0.6 mmol), (*S*)-**11j** (611.0

mg, 5.0 mmol, 96% ee), paraformaldehyde (723.8 mg, 8.0 mmol), and *i*-Pr<sub>2</sub>NH (1.0 mL, d = 0.716 g/mL, 716.0 mg, 7.1 mmol) in dioxane (7.5 mL) afforded (*S*)-**1j** (432.6 mg, 61%, 96% purity) (eluent: petroleum ether/ethyl acetate = 25/1 (800 mL) to petroleum ether/ethyl acetate = 10/1 (500 mL)] as a liquid: 96% ee (HPLC conditions: Chiralcel OD-H column, *n*-hexane/*i*-PrOH = 90/10, 1.0 mL/min, λ = 220 nm, *t*<sub>R</sub>(minor) = 7.3 min, *t*<sub>R</sub>(major) = 8.8 min); [α]<sub>D</sub><sup>20</sup> = + 28.1 (*c* = 1.05, CHCl<sub>3</sub>); <sup>1</sup>H NMR (300 MHz, CDCl<sub>3</sub>) δ 7.39 (dd, *J*<sub>1</sub> = 1.8 Hz, *J*<sub>2</sub> = 0.9 Hz, 1 H, ArH), 6.34 (dd, *J*<sub>1</sub> = 3.0 Hz, *J*<sub>2</sub> = 1.8 Hz, 1 H, ArH), 6.29 (d, *J* = 3.3 Hz, 1 H, ArH), 5.52 (q, *J* = 6.6 Hz, 1 H, OCH), 5.32-5.20 (m, 1 H, =CH), 5.03-4.90 (m, 2 H, =CH<sub>2</sub>), 2.49 (s, 1 H, OH); <sup>13</sup>C NMR (75 MHz, CDCl<sub>3</sub>) δ 207.5, 154.9, 142.1, 110.0, 106.4, 91.9, 78.0, 65.5; IR (neat) ν (cm<sup>-1</sup>) 3390, 3120, 2991, 2900, 1957, 1713, 1601, 1504, 1374, 1290, 1223, 1181, 1146, 1116, 1074, 1010; MS (EI): *m/z* (%) 136 (M<sup>+</sup>, 8.50), 97 (100); HRMS Calcd for C<sub>8</sub>H<sub>8</sub>NaO<sub>2</sub> (M<sup>+</sup>+Na): 159.0422; Found: 159.0415.

#### 4. Synthesis of (*S*)-trideca-1,2-dien-4-ol (*S*)-**1n**.<sup>2</sup> (wxy-3-042)

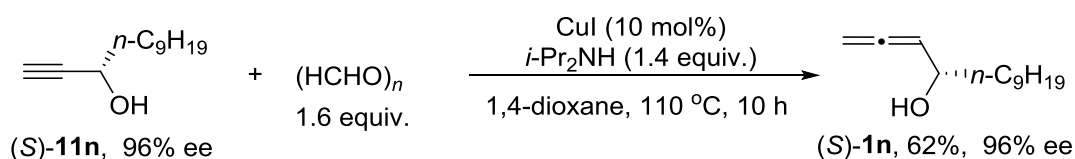

Following **Typical Procedure I**, the reaction of CuI (114.5 mg, 0.6 mmol), (*S*)-**11n** (1.0831 g, 6 mmol, 96% ee), paraformaldehyde (864.9 mg, 9.6 mmol), and *i*-Pr<sub>2</sub>NH (1.2 mL, d = 0.716 g/mL, 859.2 mg, 8.5 mmol) in dioxane (9 mL) afforded (*S*)-**1n** (718.4 mg, 62%) (eluent: petroleum ether/ethyl acetate = 40/1, 800 mL) as a liquid; 96% ee (GC conditions: restek Rt-bdex (30\*0.25\*0.25), carrier N<sub>2</sub>; 10.0 psi; injector 300 °C; detector (FID, H<sub>2</sub>, 0.4 MPa ), 250 °C; *t*<sub>R</sub>(major) = 108.5 min, *t*<sub>R</sub>(minor) = 109.2 min.) [α]<sub>D</sub><sup>20</sup> = +3.7 (*c* = 1.80, CHCl<sub>3</sub>); <sup>1</sup>H

NMR (300 MHz, CDCl<sub>3</sub>)  $\delta$  5.22 (q,  $J$  = 6.2 Hz, 1 H, =CH), 4.87-4.75 (m, 2 H, =CH<sub>2</sub>), 4.20-4.09 (m, 1 H, CH), 2.58-2.38 (m, 1 H, OH), 1.66-1.49 (m, 2 H, CH<sub>2</sub>), 1.49-1.18 (m, 14 H, CH<sub>2</sub>  $\times$  7), 0.88 (t,  $J$  = 6.8 Hz, 3 H, CH<sub>3</sub>); <sup>13</sup>C NMR (75 MHz, CDCl<sub>3</sub>)  $\delta$  207.0, 94.7, 76.9, 69.7, 37.3, 31.8, 29.52, 29.47, 29.4, 29.2, 25.3, 22.6, 14.0; IR (neat)  $\nu$  (cm<sup>-1</sup>) 3361, 2954, 2925, 2855, 1956, 1467, 1061, 1011; MS (EI):  $m/z$  (%) 157 [(M-(CH<sub>2</sub>=C=CH))<sup>+</sup>, 9.82], 69 (100);  
Anal. Calcd. for C<sub>13</sub>H<sub>24</sub>O (%): C, 79.53; H, 12.32; Found: C, 79.09; H, 12.28.

## Rh(III)-Catalyzed Oxidative Homo-coupling Cyclization of 2,3-Allenols

### 1. Synthesis of (*E*)-1-phenyl-3-(2-phenyl-2,5-dihydrofuran-4-yl)but-2-en-1-one (*E*)-**2a**.

(hx-15-188)

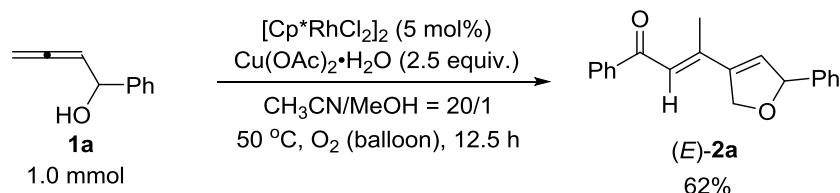

**Typical Procedure II:** To a dried Schlenk tube were added  $[\text{Cp}^*\text{RhCl}_2]_2$  (31.1 mg, 0.05 mmol) and  $\text{Cu}(\text{OAc})_2 \cdot \text{H}_2\text{O}$  (499.5 mg, 2.5 mmol) under air atmosphere. The Schlenk tube was then degassed to remove the air inside completely and refilled with  $\text{O}_2$  by a balloon of  $\text{O}_2$  for three times. After **1a** (146.4 mg, 1 mmol)/ $\text{CH}_3\text{CN}$  (1.0 mL) and MeOH (50  $\mu\text{L}$ ) were added sequentially, the reaction tube was put into an oil bath pre-heated at  $50^\circ\text{C}$ . The reaction was complete after stirring for 12.5 h as monitored by TLC. After removing the  $\text{O}_2$  balloon, the resulting mixture was diluted with ethyl acetate (15 mL) and filtered through a short column of silica gel eluted with ethyl acetate (20 mL  $\times$  2). The combined filtrate was then concentrated in vacuo and the crude residue was purified via chromatography on silica gel (eluent: petroleum ether/ethyl acetate = 15/1, 600 mL) to afford (*E*)-**2a** (90.6 mg, 62%): liquid;  $^1\text{H}$  NMR (300 MHz,  $\text{CDCl}_3$ )  $\delta$  7.97-7.87 (m, 2 H, ArH), 7.58-7.51 (m, 1 H, ArH), 7.50-7.42 (m, 2 H, ArH), 7.40-7.25 (m, 5 H, ArH), 6.56 (s, 1 H, =CH), 6.32 (q,  $J = 1.8$  Hz, 1 H, =CH), 5.99-5.90 (m, 1 H, OCH), 5.15 (ddd,  $J_1 = 11.4$  Hz,  $J_2 = 5.4$  Hz,  $J_3 = 1.8$  Hz, 1 H, one proton of  $\text{OCH}_2$ ), 5.02 (ddd,  $J_1 = 11.4$  Hz,  $J_2 = 5.4$  Hz,  $J_3 = 2.1$  Hz, 1 H, one proton of  $\text{OCH}_2$ ), 2.36 (d,  $J = 1.2$  Hz, 3 H, Me);  $^{13}\text{C}$  NMR (75 MHz,  $\text{CDCl}_3$ )  $\delta$  191.8, 144.9, 141.4, 141.0, 138.8, 132.8, 132.6, 128.6, 128.5, 128.1, 128.0, 126.3, 122.1, 88.9, 74.8, 16.6; IR (neat)  $\nu$  ( $\text{cm}^{-1}$ ) 3080, 3061, 3029, 2951, 2916, 2849, 1657, 1594, 1585, 1492, 1448, 1403, 1364,

1345, 1295, 1243, 1217, 1178, 1096, 1073, 1048, 1026, 1006; MS (EI):  $m/z$  (%) 290 ( $M^+$ , 22.8), 185 (100); HRMS Calcd. for  $C_{20}H_{18}O_2$  ( $M^+$ ): 290.1307; Found: 290.1304.

2. Synthesis of (*E*)-1-(4-fluorophenyl)-3-(2-(4-fluorophenyl)-2,5-dihydrofuran-4-yl)-but-2-en-1-one (*E*)-**2b**. (wxy-1-155)

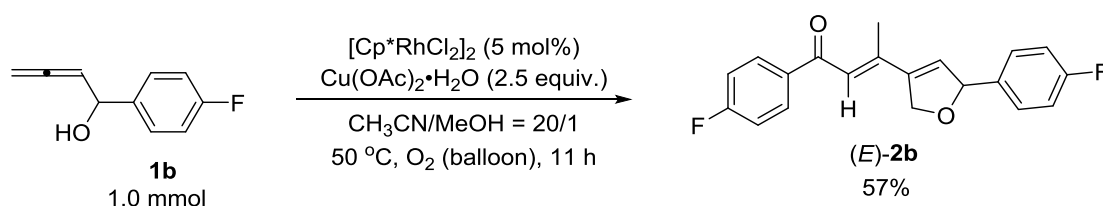

Following **Typical Procedure II**, the reaction of **1b** (166.9 mg, 1.0 mmol),  $[Cp^*RhCl_2]_2$  (31.3 mg, 0.05 mmol), and  $Cu(OAc)_2 \cdot H_2O$  (500.6 mg, 2.5 mmol) in  $CH_3CN$  (1.0 mL)/ $MeOH$  (50  $\mu L$ ) afforded (*E*)-**2b** (95.2 mg, 57%) (eluent: petroleum ether/ethyl acetate = 15/1, 600 mL); solid; m.p. 99.8-100.5  $^\circ C$  (petroleum ether/ $CH_2Cl_2$ );  $^1H$  NMR (300 MHz,  $CDCl_3$ )  $\delta$  8.04-7.88 (m, 2 H, ArH), 7.38-7.23 (m, 2 H, ArH), 7.22-7.11 (m, 2 H, ArH), 7.11-7.00 (m, 2 H, ArH), 6.53 (s, 1 H, =CH), 6.32 (d,  $J = 1.8$  Hz, 1 H, =CH), 6.00-5.90 (m, 1 H, OCH), 5.15 (ddd,  $J_1 = 11.4$  Hz,  $J_2 = 5.4$  Hz,  $J_3 = 1.8$  Hz, 1 H, one proton of  $OCH_2$ ), 5.01 (ddd,  $J_1 = 11.4$  Hz,  $J_2 = 3.6$  Hz,  $J_3 = 2.1$  Hz, 1 H, one proton of  $OCH_2$ ), 2.36 (d,  $J = 0.9$  Hz, 3 H,  $CH_3$ );  $^{13}C$  NMR (75 MHz,  $CDCl_3$ )  $\delta$  190.3, 165.5 (d,  $J = 253.0$  Hz), 162.6 (d,  $J = 244.8$  Hz), 145.0, 141.6, 136.8 (d,  $J = 2.8$  Hz), 135.1 (d,  $J = 2.8$  Hz), 132.7, 130.8 (d,  $J = 9.7$  Hz), 128.2 (d,  $J = 8.3$  Hz), 122.0, 115.7 (d,  $J = 21.4$  Hz), 115.5 (d,  $J = 21.4$  Hz), 88.4, 74.8, 16.7;  $^{19}F$  NMR (282 MHz,  $CDCl_3$ )  $\delta$  -105.9 (s, 1 F), -114.4 (s, 1 F); IR (KBr)  $\nu$  ( $cm^{-1}$ ) 3108, 3080, 3054, 3033, 2890, 2853, 1655, 1622, 1601, 1505, 1448, 1410, 1370, 1343, 1298, 1293, 1247, 1216, 1190, 1160, 1160, 1154, 1105, 1090, 1063, 1044, 1014, 1007, 1006; MS (EI):  $m/z$  (%) 326 ( $M^+$ ,



6.66), 123 (100); Anal. Calcd. for C<sub>20</sub>H<sub>16</sub>F<sub>2</sub>O<sub>2</sub> (%): C, 73.61; H, 4.94; Found: C, 73.41; H, 5.03.

3. Preparation of (*E*)-1-(2-chlorophenyl)-3-(2-(2-chlorophenyl)-2,5-dihydrofuran-4-yl)but-2-en-1-one (*E*)-**2c**. (wxy-1-125)

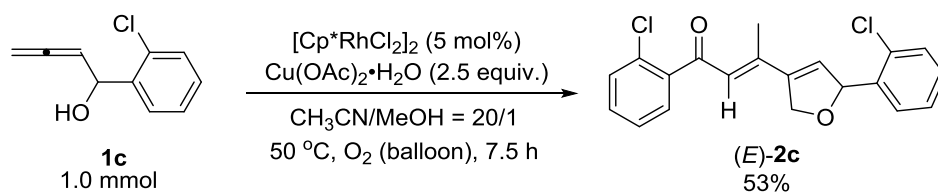

Following **Typical Procedure II**, the reaction of **1c** (180.7 mg, 1.0 mmol), [Cp\**RhCl*<sub>2</sub>]<sub>2</sub> (31.0 mg, 0.05 mmol), and Cu(OAc)<sub>2</sub>·H<sub>2</sub>O (500.2 mg, 2.5 mmol) in CH<sub>3</sub>CN (1.0 mL)/MeOH (50 μL) afforded (*E*)-**2c** (95.9 mg, 53%) (eluent: petroleum ether/ethyl acetate = 20/1, 600 mL): solid; m.p. 91.1-93.0 °C (petroleum ether/CHCl<sub>3</sub>); <sup>1</sup>H NMR (300 MHz, CDCl<sub>3</sub>) δ 7.55-7.45 (m, 2 H, ArH), 7.44-7.18 (m, 6 H, ArH), 6.52 (q, *J* = 1.8 Hz, 1 H, =CH), 6.35-6.27 (m, 2 H, OCH and =CH), 5.12 (ddd, *J*<sub>1</sub> = 11.5 Hz, *J*<sub>2</sub> = 5.5 Hz, *J*<sub>3</sub> = 1.9 Hz, 1 H, one proton of OCH<sub>2</sub>), 5.01 (ddd, *J*<sub>1</sub> = 11.4 Hz, *J*<sub>2</sub> = 5.7 Hz, *J*<sub>3</sub> = 2.1 Hz, 1 H, one proton of OCH<sub>2</sub>), 2.41 (s, 3 H, CH<sub>3</sub>); <sup>13</sup>C NMR (75 MHz, CDCl<sub>3</sub>): δ 192.9, 145.6, 141.5, 140.4, 138.6, 132.4, 131.7, 131.3, 131.1, 130.3, 129.5, 129.4, 128.9, 127.3, 127.0, 124.8, 86.0, 75.0, 16.6; IR (neat) ν (cm<sup>-1</sup>) 3067, 1665, 1609, 1591, 1579, 1469, 1435, 1368, 1299, 1264, 1239, 1212, 1160, 1127, 1098, 1078, 1050, 1034, 1004; MS (EI): *m/z* (%) 362 [(M(<sup>37</sup>Cl<sup>37</sup>Cl))<sup>+</sup>, 0.53], 360 [(M(<sup>37</sup>Cl<sup>35</sup>Cl))<sup>+</sup>, 1.67], 358 [(M(<sup>35</sup>Cl<sup>35</sup>Cl))<sup>+</sup>, 2.13], 139 (100); Anal. Calcd. for C<sub>20</sub>H<sub>16</sub>Cl<sub>2</sub>O<sub>2</sub> (%): C, 66.87; H, 4.49; Found: C, 66.74; H, 4.59.

4. Preparation of (*E*)-1-(3-chlorophenyl)-3-(2-(3-chlorophenyl)-2,5-dihydrofuran-4-yl)but-

2-en-1-one (*E*)-**2d**. (wxy-1-134)

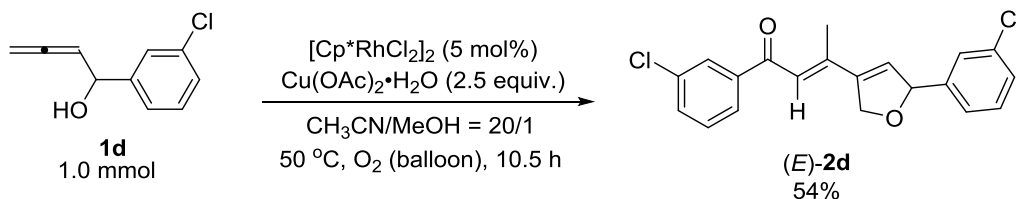

Following **Typical Procedure II**, the reaction of **1d** (180.7 mg, 1.0 mmol),  $[\text{Cp}^*\text{RhCl}_2]_2$  (31.1 mg, 0.05 mmol), and  $\text{Cu}(\text{OAc})_2 \cdot \text{H}_2\text{O}$  (500.5 mg, 2.5 mmol) in  $\text{CH}_3\text{CN}$  (1.0 mL)/ $\text{MeOH}$  (50  $\mu\text{L}$ ) afforded (*E*)-**2d** (97.1 mg, 54%) (eluent: petroleum ether/ethyl acetate = 25/1, 600 mL): oil;  $^1\text{H}$  NMR (300 MHz,  $\text{CDCl}_3$ )  $\delta$  7.87 (t,  $J = 1.7$  Hz, 1 H, ArH), 7.78 (d,  $J = 7.5$  Hz, 1 H, ArH), 7.55-7.47 (m, 1 H, ArH), 7.41 (t,  $J = 7.8$  Hz, 1 H, ArH), 7.35-7.24 (m, 3 H, ArH), 7.24-7.18 (m, 1 H, ArH), 6.50 (s, 1 H, CH=), 6.33 (q,  $J = 1.8$  Hz, 1 H, =CH), 5.95-5.89 (m, 1 H, OCH), 5.16 (ddd,  $J_1 = 11.7$  Hz,  $J_2 = 5.4$  Hz,  $J_3 = 1.8$  Hz, 1 H, one proton of  $\text{OCH}_2$ ), 5.02 (ddd,  $J_1 = 11.7$  Hz,  $J_2 = 5.4$  Hz,  $J_3 = 1.8$  Hz, 1 H, one proton of  $\text{OCH}_2$ ), 2.36 (s, 3 H,  $\text{CH}_3$ );  $^{13}\text{C}$  NMR (75 MHz,  $\text{CDCl}_3$ )  $\delta$  190.2, 145.8, 143.1, 141.6, 140.3, 134.8, 134.5, 132.7, 132.6, 129.9, 128.2, 128.1, 126.4, 126.2, 124.3, 121.7, 88.2, 74.9, 16.7; IR (neat)  $\nu$  ( $\text{cm}^{-1}$ ) 3066, 2851, 1659, 1614, 1593, 1575, 1432, 1367, 1346, 1298, 1242, 1213, 1163, 1101, 1078, 1055; MS (EI):  $m/z$  (%) 362 [ $(\text{M}^{37}\text{Cl}^{37}\text{Cl})^+$ , 0.85], 360 [ $(\text{M}^{37}\text{Cl}^{35}\text{Cl})^+$ , 4.19], 358 [ $(\text{M}^{35}\text{Cl}^{35}\text{Cl})^+$ , 7.15], 139 (100); HRMS Calcd for  $\text{C}_{20}\text{H}_{16}\text{O}_2^{35}\text{Cl}^{35}\text{Cl}$  ( $\text{M}^+$ ): 358.0527; Found: 358.0524.

#### 5. Synthesis of (*E*)-1-(3-bromophenyl)-3-(2-(3-bromophenyl)-2,5-dihydrofuran-4-yl)-

but-2-en-1-one (*E*)-**2e**. (wxy-1-192)

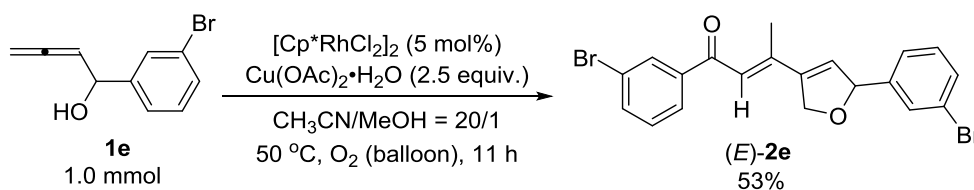

Following **Typical Procedure II**, the reaction of **1e** (227.3 mg, 1.0 mmol), [Cp\*<sup>\*</sup>RhCl<sub>2</sub>]<sub>2</sub> (31.5 mg, 0.05 mmol), and Cu(OAc)<sub>2</sub>•H<sub>2</sub>O (499.9 mg, 2.5 mmol) in CH<sub>3</sub>CN (1.0 mL)/MeOH (50 μL) afforded impure (*E*)-**2e** (131.4 mg) after chromatography on silica gel (eluent: petroleum ether/ethyl acetate = 20/1, 600 mL). The impure (*E*)-**2e** was further purified via chromatography on silica gel to afford pure (*E*)-**2e** (eluent: petroleum ether (30-60 °C)/Et<sub>2</sub>O (6/1 (600 mL)) to afford pure (*E*)-**2e** (119.7 mg, 53%): oil; <sup>1</sup>H NMR (300 MHz, CDCl<sub>3</sub>) δ 8.02 (s, 1 H, ArH), 7.82 (d, *J* = 7.8 Hz, 1 H, ArH), 7.71-7.64 (m, 1 H, ArH), 7.48 (s, 1 H, ArH), 7.46-7.38 (m, 1 H, ArH), 7.38-7.30 (m, 1 H, ArH), 7.28-7.19 (m, 2 H, ArH), 6.49 (s, 1 H, =CH), 6.33 (q, *J* = 1.8 Hz, 1 H, =CH), 5.95-5.88 (m, 1 H, OCH), 5.16 (ddd, *J*<sub>1</sub> = 11.7 Hz, *J*<sub>2</sub> = 5.4 Hz, *J*<sub>3</sub> = 1.8 Hz, 1 H, one proton of OCH<sub>2</sub>), 5.02 (ddd, *J*<sub>1</sub> = 11.4 Hz, *J*<sub>2</sub> = 3.3 Hz, *J*<sub>3</sub> = 2.1 Hz, 1 H, one proton of OCH<sub>2</sub>), 2.36 (s, 3 H, CH<sub>3</sub>); <sup>13</sup>C NMR (75 MHz, CDCl<sub>3</sub>) δ 190.1, 145.8, 143.3, 141.7, 140.5, 135.5, 132.7, 131.15, 131.09, 130.2, 130.1, 129.3, 126.7, 124.8, 122.9, 122.8, 121.7, 88.2, 74.9, 16.7; IR (KBr) ν (cm<sup>-1</sup>) 3063, 2850, 1661, 1593, 1575, 1569, 1472, 1429, 1367, 1296, 1241, 1211, 1102, 1084, 1070, 1054; MS (EI): *m/z* (%) 450 [(M(<sup>81</sup>Br<sup>81</sup>Br)<sup>+</sup>, 9.07], 448 [(M(<sup>81</sup>Br<sup>79</sup>Br)<sup>+</sup>, 18.29], 446 [(M(<sup>79</sup>Br<sup>79</sup>Br)<sup>+</sup>, 11.09], 265 (100); HRMS Calcd. for C<sub>20</sub>H<sub>16</sub>O<sub>2</sub><sup>79</sup>Br<sup>79</sup>Br (M<sup>+</sup>): 445.9517; Found: 445.9521.

6. Synthesis of (*E*)-1-(3-bromophenyl)-3-(2-(3-bromophenyl)-2,5-dihydrofuran-4-yl)-but-2-en-1-one (*E*)-**2f** and (*E*)-**8f**. (wxy-5-012)

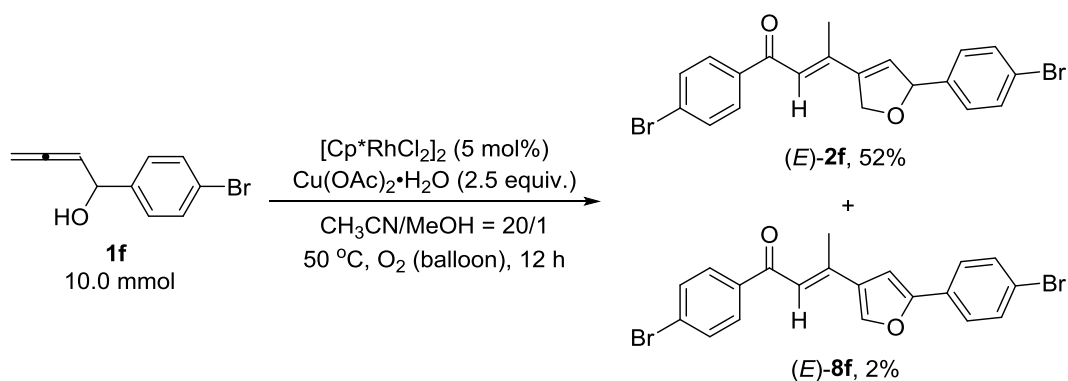

Following **Typical Procedure II**, the reaction of **1f** (2.2519 g, 10.0 mmol),  $[Cp^*RhCl_2]_2$  (312.5 mg, 0.5 mmol), and  $Cu(OAc)_2 \cdot H_2O$  (5.0019 g, 25 mmol) in  $CH_3CN$  (10 mL)/MeOH (0.5 mL) afforded (*E*)-**2f** (1.1697 g, 52%) and (*E*)-**8f** (37.0 mg, 2%) [eluent: petroleum ether/ethyl acetate = 25/1 (500 mL) to petroleum ether/ethyl acetate = 10/1 (500 mL) to petroleum ether/ethyl acetate = 5/1 (300 mL)].

(*E*)-**2f**: solid; m.p. 121.5-122.5 °C (petroleum ether/ethyl acetate);  $^1H$  NMR (300 MHz,  $CDCl_3$ )  $\delta$  7.78 (d,  $J = 8.4$  Hz, 2 H, ArH), 7.61 (d,  $J = 8.7$  Hz, 2 H, ArH), 7.50 (d,  $J = 8.4$  Hz, 2 H, ArH), 7.21 (d,  $J = 8.4$  Hz, 2 H, ArH), 6.50 (s, 1 H, =CH), 6.31 (q,  $J = 1.8$  Hz, 1 H, =CH), 6.00-5.85 (m, 1 H, OCH), 5.14 (ddd,  $J_1 = 11.4$  Hz,  $J_2 = 5.4$  Hz,  $J_3 = 1.8$  Hz, 1 H, one proton of  $OCH_2$ ), 5.01 (ddd,  $J_1 = 11.4$  Hz,  $J_2 = 3.6$  Hz,  $J_3 = 2.0$  Hz, 1 H, one proton of  $OCH_2$ ), 2.35 (d,  $J = 0.9$  Hz, 3 H,  $CH_3$ );  $^{13}C$  NMR (75 MHz,  $CDCl_3$ )  $\delta$  190.7, 145.5, 141.7, 140.0, 137.6, 132.7, 131.9, 131.8, 129.7, 128.0, 127.9, 122.0, 121.8, 88.4, 74.9, 16.8; IR (KBr)  $\nu$  ( $cm^{-1}$ ) 3080, 2849, 1657, 1588, 1485, 1404, 1243, 1215, 1176, 1090, 1070, 1049, 1009; MS (EI):  $m/z$  (%) 450 [ $(M(^{81}Br^{81}Br)^+)$ , 5.25], 448 [ $(M(^{81}Br^{79}Br)^+)$ , 10.07], 446 [ $(M(^{79}Br^{79}Br)^+)$ , 5.19], 265 (100); Anal. Calcd. for  $C_{20}H_{16}Br_2O_2$  (%): C, 53.60; H, 3.60; Found: C, 53.56; H, 3.61.

(*E*)-**8f**: solid; m.p. 164.1-164.8 °C (petroleum ether/ $CH_2Cl_2$ );  $^1H$  NMR (300 MHz,  $CDCl_3$ )  $\delta$  7.85 (d,  $J = 8.4$  Hz, 2 H, ArH), 7.78 (s, 1 H, ArH), 7.63-7.30 (m, 6 H, ArH and =CH), 7.10

(s, 1 H, =CH), 6.92 (s, 1 H, =CH), 2.52 (s, 3 H, CH<sub>3</sub>); <sup>13</sup>C NMR (75 MHz, CDCl<sub>3</sub>) δ 190.4, 154.5, 146.6, 142.4, 138.3, 132.0, 131.8, 130.6, 129.7, 128.9, 127.5, 125.6, 122.1, 118.6, 102.8, 17.6; IR (KBr) ν (cm<sup>-1</sup>) 2922, 2847, 1654, 1612, 1600, 1582, 1479, 1397, 1315, 1219, 1198, 1168, 1151, 1070, 1043, 1006; MS (EI): m/z (%) 448 [(M(<sup>81</sup>Br<sup>81</sup>Br)<sup>+</sup>, 4.60], 446 [(M(<sup>81</sup>Br<sup>79</sup>Br)<sup>+</sup>, 12.76], 444 [(M(<sup>79</sup>Br<sup>79</sup>Br)<sup>+</sup>, 7.39], 183 (100); Anal. Calcd. for C<sub>20</sub>H<sub>14</sub>Br<sub>2</sub>O<sub>2</sub> (%): C, 53.84; H, 3.16; Found: C, 53.58; H, 3.10.

7. Synthesis of (*E*)-1-(4-methoxyphenyl)-3-(2-(4-methoxyphenyl)-2,5-dihydrofuran-4-yl)-but-2-en-1-one (*E*)-**2g**. (wxy-1-151)

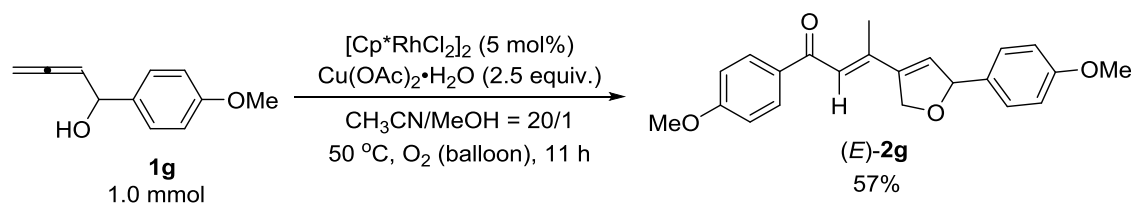

Following **Typical Procedure II**, the reaction of **1g** (175.3 mg, 1.0 mmol), [Cp\**RhCl*<sub>2</sub>]<sub>2</sub> (30.7 mg, 0.05 mmol), and Cu(OAc)<sub>2</sub>·H<sub>2</sub>O (500.3 mg, 2.5 mmol) in CH<sub>3</sub>CN (1.0 mL)/MeOH (50 μL) afforded (*E*)-**2g** (99.9 mg, 57%) (eluent: petroleum ether/ethyl acetate = 10/1, 600 mL): solid; m.p. 97.9-99.3 °C (petroleum ether/CH<sub>2</sub>Cl<sub>2</sub>); <sup>1</sup>H NMR (300 MHz, CDCl<sub>3</sub>) δ 7.92 (d, *J* = 9.0 Hz, 2 H, ArH), 7.25 (d, *J* = 8.7 Hz, 2 H, ArH), 6.95 (d, *J* = 8.7 Hz, 2 H, ArH), 6.90 (d, *J* = 8.7 Hz, 2 H, ArH), 6.54 (s, 1 H, =CH), 6.28 (q, *J* = 1.8 Hz, 1 H, =CH), 5.94-5.87 (m, 1 H, OCH), 5.13 (ddd, *J*<sub>1</sub> = 11.4 Hz, *J*<sub>2</sub> = 5.4 Hz, *J*<sub>3</sub> = 1.8 Hz, 1 H, one proton of OCH<sub>2</sub>), 4.99 (ddd, *J*<sub>1</sub> = 11.4 Hz, *J*<sub>2</sub> = 3.8 Hz, *J*<sub>3</sub> = 1.8 Hz, 1 H, one proton of OCH<sub>2</sub>), 3.87 (s, 3 H, OCH<sub>3</sub>), 3.80 (s, 3 H, OCH<sub>3</sub>), 2.34 (d, *J* = 0.9 Hz, 3 H, CH<sub>3</sub>); <sup>13</sup>C NMR (75 MHz, CDCl<sub>3</sub>) δ 190.6, 163.3, 159.5, 143.8, 141.5, 133.2, 132.3, 131.7, 130.5, 127.9, 122.4, 114.0, 113.7, 88.6, 74.6, 55.4, 55.2, 16.6; IR (KBr) ν (cm<sup>-1</sup>) 3082, 3004, 2963, 2895, 2845, 1655, 1605, 1585, 1510,

1470, 1437, 1420, 1403, 1375, 1354, 1313, 1300, 1291, 1261, 1244, 1224, 1188, 1176, 1169, 1123, 1112, 1091, 1048, 1025, 1001; MS (EI):  $m/z$  (%) 350 ( $M^+$ , 8.23), 135 (100); Anal. Calcd. for  $C_{22}H_{22}O_4$  (%): C, 75.41; H, 6.33; Found: C, 75.25; H, 6.40.

## 8. Synthesis

of

(*E*)-1-(benzodioxol-5-yl)-3-(2-(benzodioxol-5-yl)-2,5-dihydrofuran-4-yl)but-2-en-1-one

(*E*)-**2h**. (wxy-1-147)

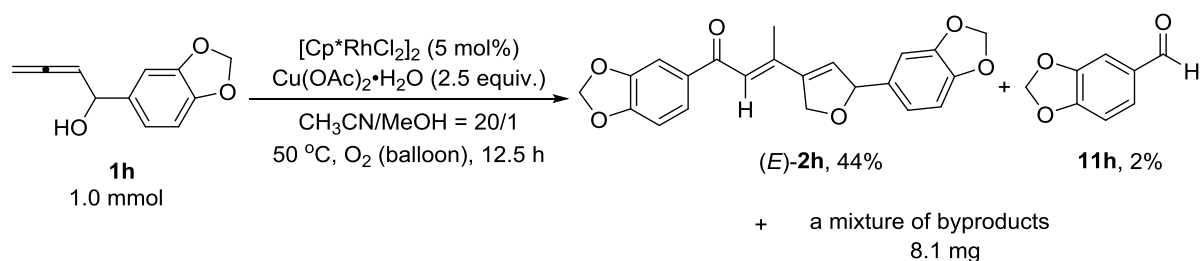

Following **Typical Procedure II**, the reaction of **1h** (191.4 mg, 1.0 mmol),  $[Cp^*RhCl_2]_2$  (31.2 mg, 0.05 mmol), and  $Cu(OAc)_2 \cdot H_2O$  (499.5 mg, 2.5 mmol) in  $CH_3CN$  (1.0 mL)/ $MeOH$  (50  $\mu L$ ) afforded (*E*)-**2h** (82.6 mg, 44%), **11h** (3.1 mg, 2%) and a mixture of other byproducts (8.1 mg) (eluent: petroleum ether/ethyl acetate = 10/1, 600 mL).

(*E*)-**2h**: solid; m.p.  $137.7$ - $138.4^\circ C$  (petroleum ether/ $CH_2Cl_2$ );  $^1H$  NMR (300 MHz,  $CDCl_3$ )  $\delta$  7.51 (dd,  $J_1 = 8.1$  Hz,  $J_2 = 1.8$  Hz, 1 H, ArH), 7.42 (d,  $J = 1.8$  Hz, 1 H, ArH), 6.86 (d,  $J = 8.1$  Hz, 1 H, ArH), 6.79 (m, 3 H, ArH), 6.47 (s, 1 H, =CH), 6.25 (q,  $J = 1.8$  Hz, 1 H, =CH), 6.05 (s, 2 H,  $CH_2$ ), 5.95 (s, 2 H,  $CH_2$ ), 5.88-5.83 (m, 1 H, OCH), 5.11 (ddd,  $J_1 = 11.7$  Hz,  $J_2 = 5.4$  Hz,  $J_3 = 1.8$  Hz, 1 H, one proton of  $OCH_2$ ), 4.97 (ddd,  $J_1 = 11.4$  Hz,  $J_2 = 3.5$  Hz,  $J_3 = 2.0$  Hz, 1 H, one proton of  $OCH_2$ ), 2.32 (d,  $J = 0.9$  Hz, 3 H,  $CH_3$ );  $^{13}C$  NMR (75 MHz,  $CDCl_3$ )  $\delta$  190.1, 151.6, 148.2, 147.9, 147.5, 143.9, 141.6, 135.0, 133.6, 132.2, 124.5, 122.4, 120.0, 108.2, 108.0, 107.8, 107.0, 101.8, 101.1, 88.8, 74.6, 16.6; IR (KBr)  $\nu$  ( $cm^{-1}$ ) 3047, 2900, 2855,

2781, 1651, 1596, 1499, 1485, 1441, 1295, 1273, 1248, 1199, 1179, 1139, 1110, 1098, 1038, 1002; MS (EI):  $m/z$  (%) 378 ( $M^+$ , 34.14), 229 (100); Anal. Calcd. for  $C_{22}H_{18}O_6$  (%): C, 69.84; H, 4.80; Found: C, 69.63; H, 4.87.

**11h**:  $^1H$  NMR (300 MHz,  $CDCl_3$ )  $\delta$  9.82 (s, 1 H, CHO), 7.42 (dd,  $J_1 = 7.8$  Hz,  $J_2 = 1.5$  Hz, 1 H, ArH), 7.34 (d,  $J = 1.5$  Hz, 1 H, ArH), 6.94 (d,  $J = 7.8$  Hz, 1 H, ArH), 6.08 (s, 2 H,  $CH_2$ ).

9. Synthesis of (*E*)-1-(naphthalen-2-yl)-3-(2-(naphthalen-2-yl)-2,5-dihydrofuran-4-yl)-but-2-en-1-one (*E*-**2i**). (wxy-1-189, wxy-2-073)

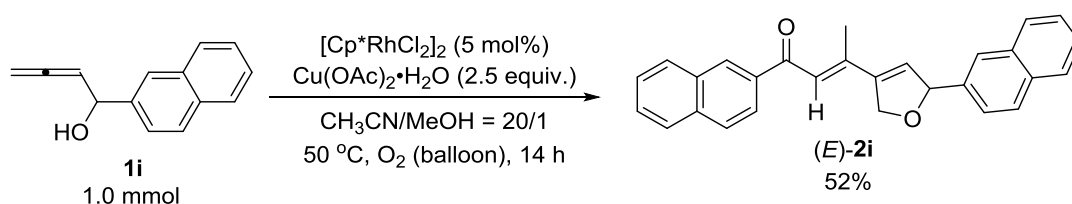

Following **Typical Procedure II**, the reaction of **1i** (196.7 mg, 1.0 mmol),  $[Cp^*RhCl_2]_2$  (31.0 mg, 0.05 mmol), and  $Cu(OAc)_2 \cdot H_2O$  (499.9 mg, 2.5 mmol) in  $CH_3CN$  (1.0 mL)/ $MeOH$  (50  $\mu L$ ) afforded (*E*)-**2i** (105.8 mg, 52%, 97% purity) (eluent: petroleum ether/ethyl acetate = 20/1, 600 mL): solid; m.p. 127.8-128.6  $^\circ C$  (petroleum ether/ $Et_2O$ );  $^1H$  NMR (300 MHz,  $CDCl_3$ )  $\delta$  8.49 (dd,  $J_1 = 8.4$  Hz,  $J_2 = 0.9$  Hz, 1 H, ArH), 8.08 (d,  $J = 8.4$  Hz, 1 H, ArH), 7.96 (d,  $J = 8.1$  Hz, 1 H, ArH), 7.91-7.84 (m, 2 H, ArH), 7.83-7.75 (m, 2 H, ArH), 7.61-7.43 (m, 7 H, ArH), 6.73-6.68 (m, 1 H, OCH), 6.59 (q,  $J = 1.8$  Hz, 1 H, =CH), 6.44 (s, 1 H, =CH), 5.15 (ddd,  $J_1 = 11.4$  Hz,  $J_2 = 5.4$  Hz,  $J_3 = 1.8$  Hz, 1 H, one proton of  $OCH_2$ ), 5.05 (ddd,  $J_1 = 11.4$  Hz,  $J_2 = 3.6$  Hz,  $J_3 = 2.1$  Hz, 1 H, one proton of  $OCH_2$ ), 2.41 (d,  $J = 0.9$  Hz, 3 H,  $CH_3$ );  $^{13}C$  NMR (75 MHz,  $CDCl_3$ )  $\delta$  195.5, 144.8, 141.8, 138.0, 136.5, 133.83, 133.75, 132.6, 132.1, 130.5, 130.1, 128.9, 128.4, 127.6, 126.4, 126.3, 125.8, 125.7, 125.6, 125.5, 124.5, 123.4,

122.9, 85.9, 74.7, 16.7; IR (neat)  $\nu$  (cm<sup>-1</sup>) 3048, 2849, 1652, 1579, 1508, 1436, 1395, 1367, 1294, 1230, 1178, 1110, 1077, 1055; MS (EI):  $m/z$  (%) 390 (M<sup>+</sup>, 39.82), 235 (100); Anal. Calcd. for C<sub>28</sub>H<sub>22</sub>O<sub>2</sub> (%): C, 86.13; H, 5.68; Found: C, 85.75; H, 5.75.

10. Synthesis of (*E*)-1-(furan-2-yl)-3-(2-(furan-2-yl)-2,5-dihydrofuran-4-yl)-but-2-en-1-one

(*E*)-**2j**. (wxy-2-020)

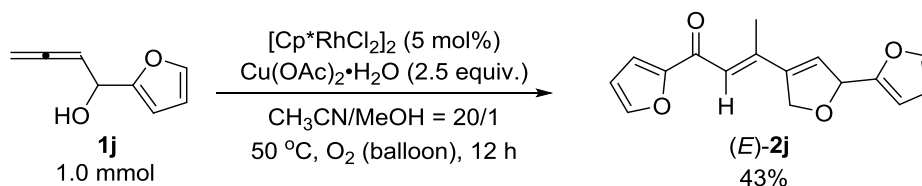

Following **Typical Procedure II**, the reaction of **1j** (136.2 mg, 1.0 mmol), [Cp<sup>\*</sup>RhCl<sub>2</sub>]<sub>2</sub> (31.0 mg, 0.05 mmol), and Cu(OAc)<sub>2</sub>·H<sub>2</sub>O (500.0 mg, 2.5 mmol) in CH<sub>3</sub>CN (1.0 mL)/MeOH (50  $\mu$ L) afforded (*E*)-**2j** (57.6 mg, 43%) (eluent: petroleum ether/ethyl acetate = 20/1, 600 mL): oil; <sup>1</sup>H NMR (300 MHz, CDCl<sub>3</sub>)  $\delta$  7.59 (d,  $J$  = 1.2 Hz, 1 H, furyl), 7.41 (d,  $J$  = 0.9 Hz, 1 H, furyl), 7.20 (d,  $J$  = 3.6 Hz, 1 H, furyl), 6.58-6.52 (m, 2 H, furyl and =CH), 6.39-6.29 (m, 3 H, furyl and =CH), 5.99-5.93 (m, 1 H, OCH), 5.08 (ddd,  $J_1$  = 11.4 Hz,  $J_2$  = 5.4 Hz,  $J_3$  = 2.1 Hz, 1 H, one proton of OCH<sub>2</sub>), 4.94 (ddd,  $J_1$  = 11.4 Hz,  $J_2$  = 3.3 Hz,  $J_3$  = 2.1 Hz, 1 H, one proton of OCH<sub>2</sub>), 2.49 (d,  $J$  = 0.9 Hz, 3 H, CH<sub>3</sub>); <sup>13</sup>C NMR (75 MHz, CDCl<sub>3</sub>)  $\delta$  179.3, 154.3, 152.9, 146.04, 146.01, 143.4, 142.9, 129.5, 120.5, 116.7, 112.4, 110.3, 107.8, 81.6, 74.2, 16.5; IR (neat)  $\nu$  (cm<sup>-1</sup>) 3121, 2853, 1652, 1591, 1501, 1467, 1387, 1305, 1256, 1154, 1092, 1052, 1013; MS (EI):  $m/z$  (%) 270 (M<sup>+</sup>, 4.34), 95 (100); HRMS Calcd. for C<sub>16</sub>H<sub>14</sub>O<sub>4</sub> (M<sup>+</sup>): 270.0892; Found: 270.0893.

11. Synthesis

of



(*E*)-1-(thiophen-2-yl)-3-(2-(thiophen-2-yl)-2,5-dihydrofuran-4-yl)-but-2-en-1-one (*E*)-**2k**.

(wxy-1-191)

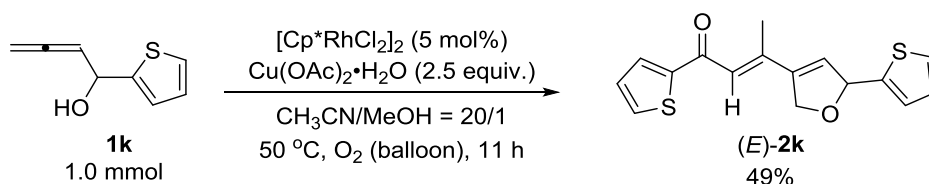

Following **Typical Procedure II**, the reaction of **1k** (153.9 mg, 1.0 mmol),  $[\text{Cp}^*\text{RhCl}_2]_2$  (31.5 mg, 0.05 mmol), and  $\text{Cu}(\text{OAc})_2 \cdot \text{H}_2\text{O}$  (499.0 mg, 2.5 mmol) in  $\text{CH}_3\text{CN}$  (1.0 mL)/ $\text{MeOH}$  (50  $\mu\text{L}$ ) afforded (*E*)-**2k** (75.0 mg, 49%) (eluent: petroleum ether/ethyl acetate = 15/1, 600 mL): solid; m.p. 77.9-78.6  $^\circ\text{C}$  (petroleum ether/ $\text{CH}_2\text{Cl}_2$ );  $^1\text{H}$  NMR (300 MHz,  $\text{CDCl}_3$ )  $\delta$  7.70 (dd,  $J_1 = 3.9$  Hz,  $J_2 = 0.9$  Hz, 1 H, thienyl), 7.64 (dd,  $J_1 = 4.8$  Hz,  $J_2 = 0.9$  Hz, 1 H, thienyl), 7.31 (dd,  $J_1 = 5.1$  Hz,  $J_2 = 1.2$  Hz, 1 H, thienyl), 7.14 (dd,  $J_1 = 5.1$  Hz,  $J_2 = 3.9$  Hz, 1 H, thienyl), 7.08-6.97 (m, 2 H, thienyl), 6.51 (s, 1 H, =CH), 6.38 (q,  $J = 1.8$  Hz, 1 H, =CH), 6.25-6.18 (m, 1 H, OCH), 5.11 (ddd,  $J_1 = 11.4$  Hz,  $J_2 = 5.1$  Hz,  $J_3 = 1.8$  Hz, 1 H, one proton of  $\text{OCH}_2$ ), 4.96 (ddd,  $J_1 = 11.4$  Hz,  $J_2 = 3.3$  Hz,  $J_3 = 1.8$  Hz, 1 H, one proton of  $\text{OCH}_2$ ), 2.45 (d,  $J = 1.2$  Hz, 3 H,  $\text{CH}_3$ );  $^{13}\text{C}$  NMR (75 MHz,  $\text{CDCl}_3$ )  $\delta$  183.5, 146.5, 145.4, 144.6, 142.2, 133.7, 132.0, 131.3, 128.2, 126.9, 125.9, 124.9, 121.5, 84.0, 74.1, 16.6; IR (KBr)  $\nu$  ( $\text{cm}^{-1}$ ) 3084, 3071, 2953, 2899, 2855, 1637, 1612, 1581, 1518, 1473, 1436, 1415, 1354, 1297, 1272, 1251, 1238, 1221, 1163, 1090, 1066, 1042; MS (EI):  $m/z$  (%) 302 ( $\text{M}^+$ , 12.23), 273 (100); Anal. Calcd. for  $\text{C}_{16}\text{H}_{14}\text{O}_2\text{S}_2$  (%): C, 63.55; H, 4.67; Found: C, 63.48; H, 4.72.

12. Synthesis of (*E,E,E*)-**2l**. (wxy-3-024)

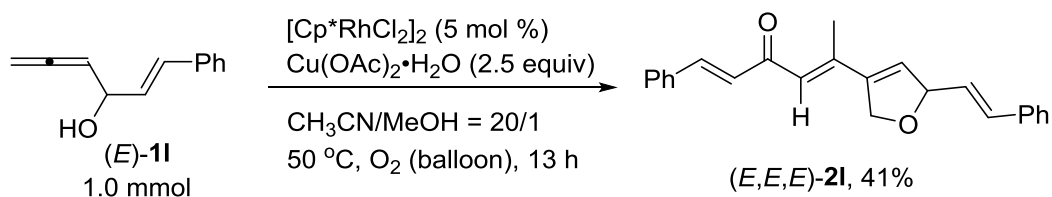

Following **Typical Procedure II**, the reaction of  $(E)$ -**11** (172.8 mg, 1.0 mmol),  $[Cp^*RhCl_2]_2$  (31.0 mg, 0.05 mmol), and  $Cu(OAc)_2 \cdot H_2O$  (499.2 mg, 2.5 mmol) in  $CH_3CN$  (1.0 mL)/MeOH (50  $\mu$ L) afforded impure  $(E,E,E)$ -**21** (85.5 mg) after chromatography on silica gel (eluent: petroleum ether/ethyl acetate = 20/1, 700 mL). The impure  $(E,E,E)$ -**21** was further purified via chromatography on silica gel (eluent: petroleum ether/ethyl acetate = 15/1, 500 mL) to afford pure  $(E,E,E)$ -**21** (70.4 mg, 41%): liquid;  $^1H$  NMR (300 MHz,  $CDCl_3$ )  $\delta$  7.63-7.51 (m, 3 H, ArH and =CH), 7.43-7.34 (m, 5 H, ArH), 7.34-7.20 (m, 3 H, ArH), 6.85 (d,  $J = 16.2$  Hz, 1 H, =CH), 6.64 (d,  $J = 15.9$  Hz, 1 H, =CH), 6.25 (q,  $J = 1.8$  Hz, 1 H, =CH), 6.18 (dd,  $J_1 = 15.9$  Hz,  $J_2 = 7.2$  Hz, 1 H, =CH), 6.11 (s, 1 H, =CH), 5.59-5.49 (m, 1 H, OCH), 5.01 (ddd,  $J_1 = 11.4$  Hz,  $J_2 = 5.1$  Hz,  $J_3 = 1.8$  Hz, 1 H, one proton of  $OCH_2$ ), 4.90 (ddd,  $J_1 = 11.4$  Hz,  $J_2 = 3.6$  Hz,  $J_3 = 2.1$  Hz, 1 H, one proton of  $OCH_2$ ), 2.41 (d,  $J = 0.9$  Hz, 3 H,  $CH_3$ );  $^{13}C$  NMR (75 MHz,  $CDCl_3$ )  $\delta$  190.2, 144.9, 142.7, 141.9, 136.3, 134.6, 131.9, 131.5, 130.3, 128.8, 128.5, 128.3, 128.0, 127.9, 127.8, 126.6, 124.3, 87.8, 74.2, 16.4; IR (neat)  $\nu$  ( $cm^{-1}$ ) 3081, 3059, 3026, 2848, 1668, 1653, 1641, 1622, 1616, 1575, 1495, 1447, 1367, 1327, 1302, 1189, 1116, 1048; MS (EI):  $m/z$  (%) 342 ( $M^+$ , 24.75), 312 (100); HRMS Calcd. for  $C_{24}H_{22}O_2$  ( $M^+$ ): 342.1620; Found: 342.1621.

13. Synthesis of  $(E)$ -2-(2-hexyl-2,5-dihydrofuran-4-yl)dec-2-en-4-one  $(E)$ -**2m**. (hx-16-008, hx-15-181)

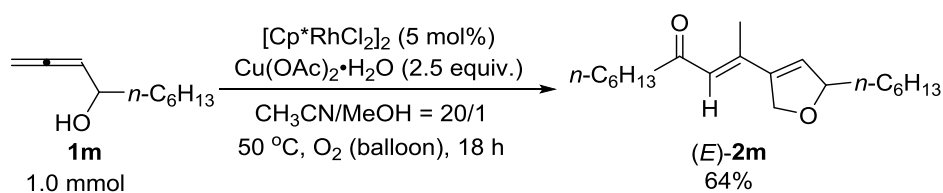

Following **Typical Procedure II**, the reaction of **1m** (154.5 mg, 1.0 mmol),  $[\text{Cp}^*\text{RhCl}_2]_2$  (31.0 mg, 0.05 mmol), and  $\text{Cu}(\text{OAc})_2 \cdot \text{H}_2\text{O}$  (499.2 mg, 2.5 mmol) in  $\text{CH}_3\text{CN}$  (1 mL)/ $\text{MeOH}$  (50  $\mu\text{L}$ ) afforded (*E*)-**2m** (98.0 mg, 64%) [eluent: petroleum ether/ethyl acetate = 50/1 (500 mL) to 20/1 (400 mL)]: solid; m.p. 38.2-42.4  $^\circ\text{C}$  (determined without recrystallization): liquid;  $^1\text{H}$  NMR (300 MHz,  $\text{CDCl}_3$ )  $\delta$  6.27-6.20 (m, 1 H, =CH), 5.80 (s, 1 H, =CH), 5.01-4.89 (m, 1 H, OCH), 4.82 (ddd,  $J_1 = 11.4$  Hz,  $J_2 = 5.1$  Hz,  $J_3 = 1.8$  Hz, 1 H, one proton of  $\text{OCH}_2$ ), 4.74 (ddd,  $J_1 = 11.4$  Hz,  $J_2 = 3.6$  Hz,  $J_3 = 2.1$  Hz, 1 H, one proton of  $\text{OCH}_2$ ), 2.47 (t,  $J = 7.5$  Hz, 2 H,  $\text{CH}_2$ ), 2.32 (d,  $J = 0.9$  Hz, 3 H, Me), 1.68-1.48 (m, 4 H,  $\text{CH}_2 \times 2$ ), 1.47-1.18 (m, 14 H,  $\text{CH}_2 \times 7$ ), 0.88 (t,  $J = 6.8$  Hz, 6 H, Me  $\times 2$ );  $^{13}\text{C}$  NMR (75 MHz,  $\text{CDCl}_3$ )  $\delta$  201.8, 143.9, 141.2, 133.6, 123.5, 87.3, 73.9, 44.7, 35.7, 31.7, 31.6, 29.3, 28.8, 25.2, 24.1, 22.5, 22.4, 16.0, 14.00, 13.96; IR (neat)  $\nu$  ( $\text{cm}^{-1}$ ) 2955, 2928, 2856, 1685, 1616, 1589, 1466, 1406, 1367, 1201, 1132, 1101, 1054; MS (EI):  $m/z$  (%) 307 ( $\text{M}^+ + 1$ , 6.5), 306 ( $\text{M}^+$ , 23.2), 221 (100); HRMS Calcd. for  $\text{C}_{20}\text{H}_{34}\text{O}_2$  ( $\text{M}^+$ ): 306.2559; Found: 306.2563.

#### 14. Synthesis of (*E*)-2-(2-nonyl-2,5-dihydrofuran-4-yl)tridec-2-en-4-one (*E*)-**2n**. (wxy-3-041)

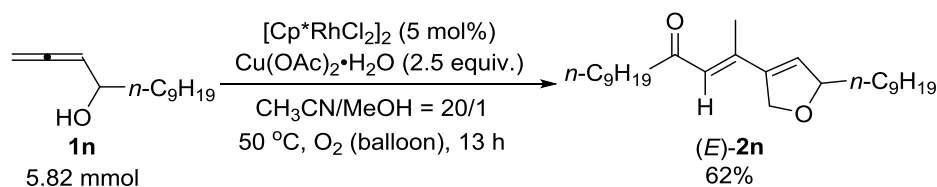

Following **Typical Procedure II**, the reaction of **1n** (1.1990 g, 5.82 mmol, 97% purity),  $[\text{Cp}^*\text{RhCl}_2]_2$  (185.4 mg, 0.3 mmol), and  $\text{Cu}(\text{OAc})_2 \cdot \text{H}_2\text{O}$  (2.9945 g, 15 mmol) in  $\text{CH}_3\text{CN}$  (6

mL)/MeOH (0.3 mL) afforded (*E*)-**2n** (714.3 mg, 62%) (eluent: petroleum ether/ethyl acetate = 35/1, 1000 mL): solid; m.p. 38.2-42.4 °C (determined without recrystallization); <sup>1</sup>H NMR (300 MHz, CDCl<sub>3</sub>) δ 6.24 (q, *J* = 1.8 Hz, 1 H, =CH), 5.80 (s, 1 H, =CH), 5.00-4.88 (m, 1 H, OCH), 4.82 (ddd, *J*<sub>1</sub> = 11.4 Hz, *J*<sub>2</sub> = 5.1 Hz, *J*<sub>3</sub> = 1.8 Hz, 1 H, one proton of OCH<sub>2</sub>), 4.74 (ddd, *J*<sub>1</sub> = 11.4 Hz, *J*<sub>2</sub> = 3.6 Hz, *J*<sub>3</sub> = 1.8 Hz, 1 H, one proton of OCH<sub>2</sub>), 2.46 (t, *J* = 7.5 Hz, 2 H, CH<sub>2</sub>), 2.32 (d, *J* = 0.9 Hz, 3 H, CH<sub>3</sub>), 1.68-1.50 (m, 4 H, CH<sub>2</sub> × 2), 1.48-1.15 (m, 26 H, CH<sub>2</sub> × 13), 0.88 (t, *J* = 6.8 Hz, 6 H, CH<sub>3</sub> × 2); <sup>13</sup>C NMR (75 MHz, CDCl<sub>3</sub>) δ 201.8, 143.9, 141.3, 133.6, 123.6, 87.3, 74.0, 44.8, 35.7, 31.8, 29.6, 29.53, 29.50, 29.4, 29.3, 29.22, 29.19, 25.3, 24.2, 22.6, 16.1, 14.0; IR (neat) ν (cm<sup>-1</sup>) 2953, 2925, 2854, 1687, 1683, 1616, 1589, 1464, 1405, 1367, 1131, 1103, 1046; MS (EI): *m/z* (%) 390 (M<sup>+</sup>, 9.17), 263 (100); Anal. Calcd. for C<sub>26</sub>H<sub>46</sub>O<sub>2</sub> (%): C, 79.94; H, 11.87; Found: C, 79.72; H, 11.81.

15. Synthesis of (*E*)-2-(2-undecyl-2,5-dihydrofuran-4-yl)pentadec-2-en-4-one (*E*)-**2o**.

(fjj-1-118)

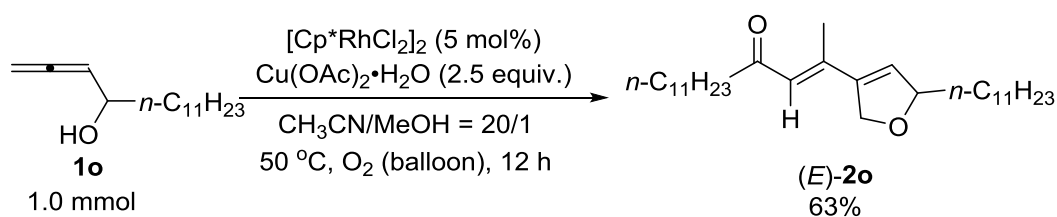

Following **Typical Procedure II**, the reaction of **1o** (223.9 mg, 1 mmol), [Cp<sup>\*</sup>RhCl<sub>2</sub>]<sub>2</sub> (30.8 mg, 0.05 mmol), and Cu(OAc)<sub>2</sub>·H<sub>2</sub>O (499.0 mg, 2.5 mmol) in CH<sub>3</sub>CN (1.0 mL)/MeOH (50 μL) afforded (*E*)-**2o** (141.2 mg, 63%) [eluent: petroleum ether/ethyl acetate = 80/1 (300 mL) to 50/1 (300 mL)]: solid; m.p. 44.7-47.2 °C (determined without recrystallization); <sup>1</sup>H NMR (300 MHz, CDCl<sub>3</sub>) δ 6.24 (s, 1 H, =CH), 5.80 (s, 1 H, =CH), 5.00-4.89 (m, 1 H, OCH), 4.88-4.68 (m, 2 H, OCH<sub>2</sub>), 2.47 (t, *J* = 7.5 Hz, 2 H, CH<sub>2</sub>), 2.32 (s, 3 H, CH<sub>3</sub>), 1.68-1.50 (m, 4

H, CH<sub>2</sub> × 2), 1.48-1.15 (m, 34 H, CH<sub>2</sub> × 17), 0.88 (t, *J* = 6.6 Hz, 6 H, CH<sub>3</sub> × 2); <sup>13</sup>C NMR (75 MHz, CDCl<sub>3</sub>) δ 201.8, 143.9, 141.3, 133.6, 123.6, 87.3, 74.0, 44.8, 35.8, 31.9, 29.7, 29.62, 29.58, 29.55, 29.5, 29.4, 29.3, 29.2, 25.3, 24.2, 22.6, 16.1, 14.1; IR (neat) ν (cm<sup>-1</sup>) 2954, 2918, 2849, 1683, 1591, 1470, 1133, 1096; MS (EI): *m/z* (%) 446 (M<sup>+</sup>, 6.92), 263 (100); Anal. Calcd. for C<sub>30</sub>H<sub>54</sub>O<sub>2</sub> (%): C, 80.65; H, 12.18; Found: C, 80.22; H, 12.07.

16. Preparation of (*E*)-2-(2-isobutyl-2,5-dihydrofuran-4-yl)-6-methylhept-2-en-4-one (*E*)-**2p**.

(wxy-1-135)

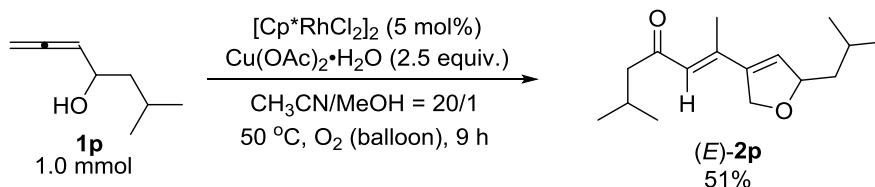

Following **Typical Procedure II**, the reaction of **1p** (128.2 mg, 1.0 mmol), [Cp<sup>\*</sup>RhCl<sub>2</sub>]<sub>2</sub> (31.2 mg, 0.05 mmol), and Cu(OAc)<sub>2</sub>·H<sub>2</sub>O (500.7 mg, 2.5 mmol) in CH<sub>3</sub>CN (1.0 mL)/MeOH (50 μL) afforded (*E*)-**2p** (64.8 mg, 51%) (eluent: petroleum ether/ethyl acetate = 30/1, 600 mL): liquid; <sup>1</sup>H NMR (300 MHz, CDCl<sub>3</sub>) δ 6.25 (d, *J* = 1.8 Hz, 1 H, =CH), 5.79 (s, 1 H, CH=), 5.03-4.95 (m, 1 H, OCH), 4.81 (ddd, *J*<sub>1</sub> = 11.4 Hz, *J*<sub>2</sub> = 5.4 Hz, *J*<sub>3</sub> = 1.8 Hz, 1 H, one proton of OCH<sub>2</sub>), 4.73 (ddd, *J*<sub>1</sub> = 11.4 Hz, *J*<sub>2</sub> = 3.5 Hz, *J*<sub>3</sub> = 2.0 Hz, 1 H, one proton of OCH<sub>2</sub>), 2.35 (d, *J* = 6.9 Hz, 2 H, COCH<sub>2</sub>), 2.32 (d, *J* = 6.9 Hz, 3 H, CH<sub>3</sub>), 2.21-2.07 (m, 1 H, CH), 1.88-1.72 (m, 1 H, CH), 1.58-1.47 (m, 1 H, one proton of CH<sub>2</sub>), 1.45-1.34 (m, 1 H, one proton of CH<sub>2</sub>), 0.94 (t, *J* = 6.6 Hz, 12 H, CH<sub>3</sub> × 4); <sup>13</sup>C NMR (75 MHz, CDCl<sub>3</sub>) δ 201.4, 143.8, 141.0, 134.1, 123.8, 85.7, 73.6, 53.7, 44.7, 25.1, 25.0, 23.2, 22.5, 22.4, 16.0; IR (neat) ν (cm<sup>-1</sup>) 2956, 2929, 2870, 1683, 1616, 1587, 1467, 1404, 1386, 1367, 1287, 1171, 1148, 1123, 1099, 1052 ; MS (EI): *m/z* (%) 250 (M<sup>+</sup>, 7.99), 109 (100); HRMS Calcd for C<sub>16</sub>H<sub>26</sub>O<sub>2</sub>

(M<sup>+</sup>): 250.1933; Found: 250.1934.

17. Synthesis of (*E*)-1-phenyl-4-(2-benzyl-2,5-dihydrofuran-4-yl)-pent-3-en-2-one (*E*)-**2q**.

(wxy-1-145)

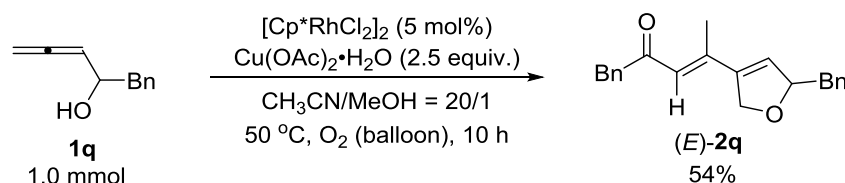

Following **Typical Procedure II**, the reaction of **1q** (160.3 mg, 1.0 mmol),  $[\text{Cp}^*\text{RhCl}_2]_2$  (31.0 mg, 0.05 mmol), and  $\text{Cu}(\text{OAc})_2 \cdot \text{H}_2\text{O}$  (500.3 mg, 2.5 mmol) in  $\text{CH}_3\text{CN}$  (1.0 mL)/ $\text{MeOH}$  (50  $\mu\text{L}$ ) afforded (*E*)-**2q** (85.9 mg, 54%) (eluent: petroleum ether/ethyl acetate = 20/1, 800 mL): oil;  $^1\text{H}$  NMR (300 MHz,  $\text{CDCl}_3$ )  $\delta$  7.35-7.15 (m, 10 H, ArH), 6.18 (q,  $J = 1.8$  Hz, 1 H, =CH), 5.80 (s, 1 H, =CH), 5.18-5.08 (m, 1 H, OCH), 4.72-4.60 (m, 2 H,  $\text{OCH}_2$ ), 3.72 (s, 2 H,  $\text{CH}_2\text{CO}$ ), 2.94 (dd,  $J_1 = 13.8$  Hz,  $J_2 = 6.6$  Hz, 1 H, one proton of  $\text{CH}_2$ ), 2.82 (dd,  $J_1 = 13.5$  Hz,  $J_2 = 6.6$  Hz, 1 H, one proton of  $\text{CH}_2$ ), 2.27 (d,  $J = 1.2$  Hz, 3 H,  $\text{CH}_3$ );  $^{13}\text{C}$  NMR (75 MHz,  $\text{CDCl}_3$ )  $\delta$  198.3, 145.2, 141.7, 137.5, 134.5, 133.1, 129.4, 129.2, 128.6, 128.3, 126.9, 126.4, 122.9, 88.0, 74.0, 51.6, 42.3, 16.1; IR (neat)  $\nu$  ( $\text{cm}^{-1}$ ) 3087, 3062, 3028, 2917, 2848, 1687, 1683, 1616, 1588, 1495, 1454, 1404, 1366, 1326, 1207, 1189, 1104, 1031, 1003; MS (EI):  $m/z$  (%) 318 ( $\text{M}^+$ , 7.72), 319 ( $\text{M}^+ + 1$ , 7.56), 227 (100), 91 (100); HRMS Calcd. for  $\text{C}_{22}\text{H}_{22}\text{O}_2$  ( $\text{M}^+$ ): 318.1620; Found: 318.1623.

18. Preparation of (*E*)-1-phenyl-5-(2-phenethyl-2,5-dihydrofuran-4-yl)-hex-4-en-3-one (*E*)-**2r**.

(wxy-1-131)

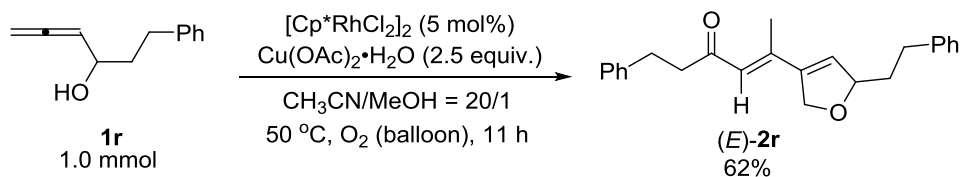

Following **Typical Procedure II**, the reaction of **1r** (174.5 mg, 1.0 mmol),  $[\text{Cp}^*\text{RhCl}_2]_2$  (31.0 mg, 0.05 mmol), and  $\text{Cu(OAc)}_2\cdot\text{H}_2\text{O}$  (500.1 mg, 2.5 mmol) in  $\text{CH}_3\text{CN}$  (1.0 mL)/ $\text{MeOH}$  (50  $\mu\text{L}$ ) afforded (*E*)-**2r** (106.6 mg, 62%) (eluent: petroleum ether/ethyl acetate = 20/1, 600 mL): liquid;  $^1\text{H NMR}$  (300 MHz,  $\text{CDCl}_3$ )  $\delta$  7.34-7.24 (m, 4 H, ArH), 7.23-7.14 (m, 6 H, ArH), 6.18 (q,  $J = 1.8$  Hz, 1 H, =CH), 5.76 (s, 1 H, =CH), 5.02-4.92 (m, 1 H, OCH), 4.80 (ddd,  $J_1 = 11.3$  Hz,  $J_2 = 5.1$  Hz,  $J_3 = 1.4$  Hz, 1 H, one proton of  $\text{OCH}_2$ ), 4.71 (ddd,  $J_1 = 11.4$  Hz,  $J_2 = 3.3$  Hz,  $J_3 = 1.8$  Hz, 1 H, one proton of  $\text{OCH}_2$ ), 2.92 (t,  $J = 7.7$  Hz, 2 H,  $\text{CH}_2$ ), 2.85-2.59 (m, 4 H,  $\text{CH}_2 \times 2$ ), 2.30 (s, 3 H,  $\text{CH}_3$ ), 1.98-1.82 (m, 2 H,  $\text{CH}_2$ );  $^{13}\text{C NMR}$  (75 MHz,  $\text{CDCl}_3$ )  $\delta$  200.3, 144.2, 141.7, 141.4, 141.0, 133.5, 128.38, 128.34, 128.32, 128.26, 126.0, 125.8, 123.5, 86.5, 74.0, 46.1, 37.2, 31.4, 30.0, 16.1; IR (neat)  $\nu$  ( $\text{cm}^{-1}$ ) 3080, 3061, 3026, 2925, 2852, 1683, 1616, 1589, 1496, 1454, 1111, 1072, 1031; MS (EI):  $m/z$  (%) 346 ( $\text{M}^+$ , 10.90), 91 (100); HRMS Calcd for  $\text{C}_{24}\text{H}_{26}\text{O}_2$  ( $\text{M}^+$ ): 346.1933; Found: 346.1937.

#### 19. Synthesis of (*E*)-2-(2-(5-chloropentyl)-2,5-dihydrofuran-4-yl)-9-chloro-non-2-en-4-one

(*E*)-**2s**. (wxy-2-018)

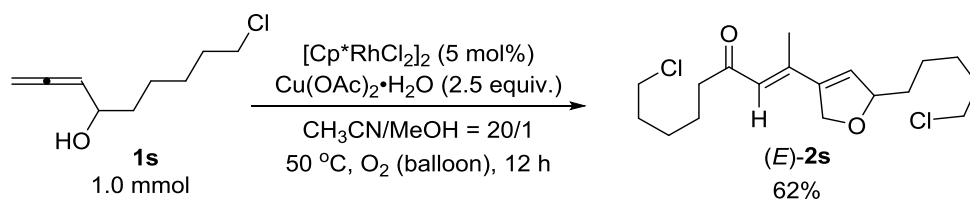

Following **Typical Procedure II**, the reaction of **1s** (174.5 mg, 1.0 mmol),  $[\text{Cp}^*\text{RhCl}_2]_2$  (30.9 mg, 0.05 mmol), and  $\text{Cu(OAc)}_2\cdot\text{H}_2\text{O}$  (500.0 mg, 2.5 mmol) in  $\text{CH}_3\text{CN}$  (1.0 mL)/ $\text{MeOH}$

(50  $\mu$ L) afforded (*E*)-**2s** (107.8 mg, 62%) (eluent: petroleum ether/ethyl acetate = 20/1, 600 mL): liquid;  $^1\text{H}$  NMR (300 MHz,  $\text{CDCl}_3$ )  $\delta$  6.24 (q,  $J$  = 1.5 Hz, 1 H, =CH), 5.80 (s, 1 H, =CH), 5.03-4.91 (m, 1 H, OCH), 4.86-4.70 (m, 2 H,  $\text{OCH}_2$ ), 3.54 (t,  $J$  = 6.5 Hz, 4 H,  $\text{CH}_2 \times 2$ ), 2.51 (t,  $J$  = 7.2 Hz, 2 H,  $\text{COCH}_2$ ), 2.33 (s, 3 H,  $\text{CH}_3$ ), 1.85-1.72 (m, 4 H,  $\text{CH}_2 \times 2$ ), 1.70-1.55 (m, 4 H,  $\text{CH}_2 \times 2$ ), 1.55-1.38 (m, 6 H,  $\text{CH}_2 \times 3$ );  $^{13}\text{C}$  NMR (75 MHz,  $\text{CDCl}_3$ )  $\delta$  201.0, 143.9, 141.2, 133.4, 123.3, 86.9, 73.8, 44.8, 44.7, 44.2, 35.3, 32.3, 32.2, 26.7, 26.2, 24.4, 23.1, 15.9; IR (neat)  $\nu$  ( $\text{cm}^{-1}$ ) 2928, 2852, 1683, 1588, 1368, 1111, 1046; MS (EI):  $m/z$  (%) 350 [ $\text{M}(^{37}\text{Cl}^{37}\text{Cl})^+$ , 1.28], 348 [ $\text{M}(^{37}\text{Cl}^{35}\text{Cl})^+$ , 5.84], 346 [ $\text{M}(^{35}\text{Cl}^{35}\text{Cl})^+$ , 7.74], 241 (100); HRMS Calcd. for  $\text{C}_{18}\text{H}_{28}\text{O}_2^{35}\text{Cl}^{35}\text{Cl}(\text{M}^+)$ : 346.1466; Found: 346.1465.

## 20. Synthesis of (*E*)-**2t**. (fjj-1-121)

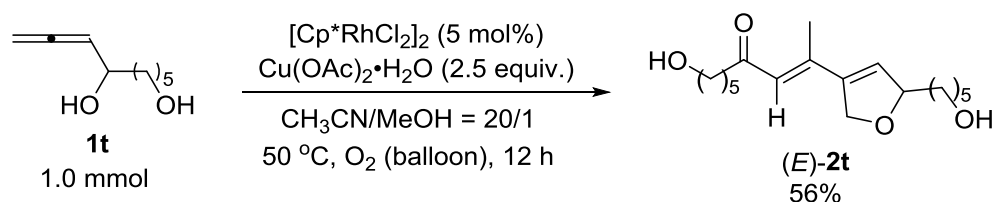

Following **Typical Procedure II**, the reaction of **1t** (156.4 mg, 1 mmol),  $[\text{Cp}^*\text{RhCl}_2]_2$  (30.9 mg, 0.05 mmol), and  $\text{Cu(OAc)}_2 \cdot \text{H}_2\text{O}$  (499.2 mg, 2.5 mmol) in  $\text{CH}_3\text{CN}$  (1.0 mL)/ $\text{MeOH}$  (50  $\mu$ L) afforded (*E*)-**2t** (87.1 mg, 56%) [eluent: petroleum ether/ethyl acetate = 1/1 (500 mL) to petroleum ether/ethyl acetate 1/2 (500 mL) to ethyl acetate (500 mL)]: oil;  $^1\text{H}$  NMR (300 MHz,  $\text{CDCl}_3$ )  $\delta$  6.25 (s, 1 H, =CH), 5.81 (s, 1 H, =CH), 5.02-4.90 (m, 1 H, OCH), 4.86-4.68 (m, 2 H,  $\text{OCH}_2$ ), 3.63 (t,  $J$  = 6.2 Hz, 4 H,  $\text{OCH}_2 \times 2$ ), 2.58-2.40 (4 H,  $\text{CH}_2$  and  $\text{OH} \times 2$ ), 2.32 (s, 3 H,  $\text{CH}_3$ ), 1.72-1.50 (m, 8 H,  $\text{CH}_2 \times 4$ ), 1.48-1.30 (m, 6 H,  $\text{CH}_2 \times 3$ );  $^{13}\text{C}$  NMR (75 MHz,  $\text{CDCl}_3$ )  $\delta$  201.7, 144.1, 141.1, 133.5, 123.4, 87.1, 73.9, 62.4, 62.3, 44.5, 35.5, 32.4, 32.3, 25.6,



25.2, 24.9, 23.6, 16.0; IR (neat)  $\nu$  (cm<sup>-1</sup>) 3390, 2932, 2858, 1682, 1587, 1119, 1051; MS (EI):  $m/z$  (%) 310 (M<sup>+</sup>, 7.20), 69 (100); HRMS Calcd. for C<sub>18</sub>H<sub>30</sub>O<sub>4</sub> (M<sup>+</sup>): 310.2144; Found: 310.2143.

21. Synthesis of (*E*)-1-cyclohexyl-3-(2-cyclohexyl-2,5-dihydrofuran-4-yl)but-2-en-1-one  
(*E*)-**2u**. (wxy-2-145)

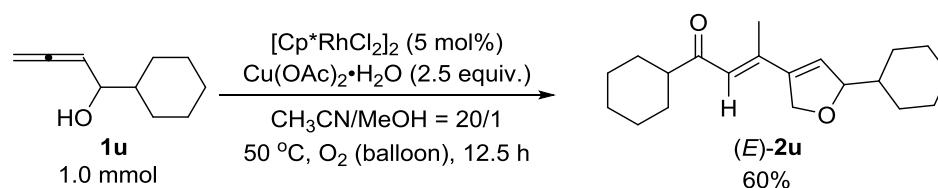

Following **Typical Procedure II**, the reaction of **1u** (152.2 mg, 1.0 mmol), [Cp<sup>\*</sup>RhCl<sub>2</sub>]<sub>2</sub> (31.1 mg, 0.05 mmol), and Cu(OAc)<sub>2</sub>·H<sub>2</sub>O (499.9 mg, 2.5 mmol) in CH<sub>3</sub>CN (1.0 mL)/MeOH (50  $\mu$ L) afforded (*E*)-**2u** (91.1 mg, 60%) (eluent: petroleum ether/ethyl acetate = 40/1, 800 mL): liquid; <sup>1</sup>H NMR (300 MHz, CDCl<sub>3</sub>)  $\delta$  6.24 (s, 1 H, =CH), 5.84 (s, 1 H, =CH), 4.85-4.70 (m, 3 H, OCH + OCH<sub>2</sub>), 2.45-2.25 (m, 4 H, CH + CH<sub>3</sub>), 1.90-1.60 (m, 10 H, 5  $\times$  CH<sub>2</sub>), 1.60-1.45 (m, 1 H, CH), 1.41-0.94 (m, 10 H, 5  $\times$  CH<sub>2</sub>); <sup>13</sup>C NMR (75 MHz, CDCl<sub>3</sub>)  $\delta$  204.7, 144.3, 141.8, 131.9, 122.8, 91.8, 74.3, 51.9, 43.5, 28.7, 28.5, 28.4, 26.4, 26.1, 26.0, 25.8, 25.7, 16.1; IR (neat)  $\nu$  (cm<sup>-1</sup>) 2926, 2852, 1682, 1615, 1587, 1450, 1368, 1314, 1289, 1233, 1185, 1146, 1098, 1051; MS (EI):  $m/z$  (%) 302 (M<sup>+</sup>, 7.47), 83 (100); HRMS Calcd. for C<sub>20</sub>H<sub>30</sub>O<sub>2</sub> (M<sup>+</sup>): 302.2246; Found: 302.2247.

22. Synthesis of (*E*)-2,2-dimethyl-5-(2-(tert-butyl)-2,5-dihydrofuran-4-yl)-hex-4-en-3-one  
(*E*)-**2v**. (wxy-1-159)

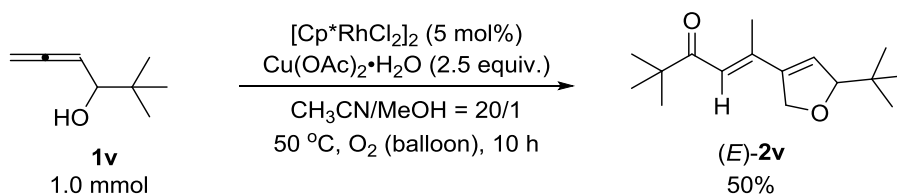

Following **Typical Procedure II**, the reaction of **1v** (128.1 mg, 1.0 mmol),  $[Cp^*RhCl_2]_2$  (31.0 mg, 0.05 mmol), and  $Cu(OAc)_2 \cdot H_2O$  (499.9 mg, 2.5 mmol) in  $CH_3CN$  (1.0 mL)/ $MeOH$  (50  $\mu L$ ) afforded (*E*)-**2v** (63.4 mg, 50%) [eluent: petroleum ether (30-60  $^\circ C$ )/ethyl acetate = 50/1, 800 mL]: solid; low melting point;  $^1H$  NMR (300 MHz,  $CDCl_3$ )  $\delta$  6.23 (d,  $J = 1.5$  Hz, 1 H, =CH), 6.06 (s, 1 H, =CH), 4.86-4.74 (m, 2 H,  $OCH_2$ ), 4.64-4.57 (m, 1 H, OCH), 2.29 (d,  $J = 0.9$  Hz, 3 H,  $CH_3$ ), 1.16 (s, 9 H, *t*-Bu), 0.92 (s, 9 H, *t*-Bu);  $^{13}C$  NMR (75 MHz,  $CDCl_3$ )  $\delta$  206.8, 144.2, 142.5, 130.6, 119.9, 95.8, 74.6, 44.0, 36.1, 26.5, 25.6, 16.2; IR (neat)  $\nu$  ( $cm^{-1}$ ) 2958, 2902, 2868, 1679, 1616, 1587, 1478, 1393, 1365, 1312, 1192, 1102, 1066, 1036, 1016; MS (EI):  $m/z$  (%) 250 ( $M^+$ , 2.87), 57 (100); HRMS Calcd. for  $C_{16}H_{26}O_2$  ( $M^+$ ): 250.1933; Found: 250.1932.

### 23. The cross-coupling reaction between **1x** and **1e**. (wxy-7-163)

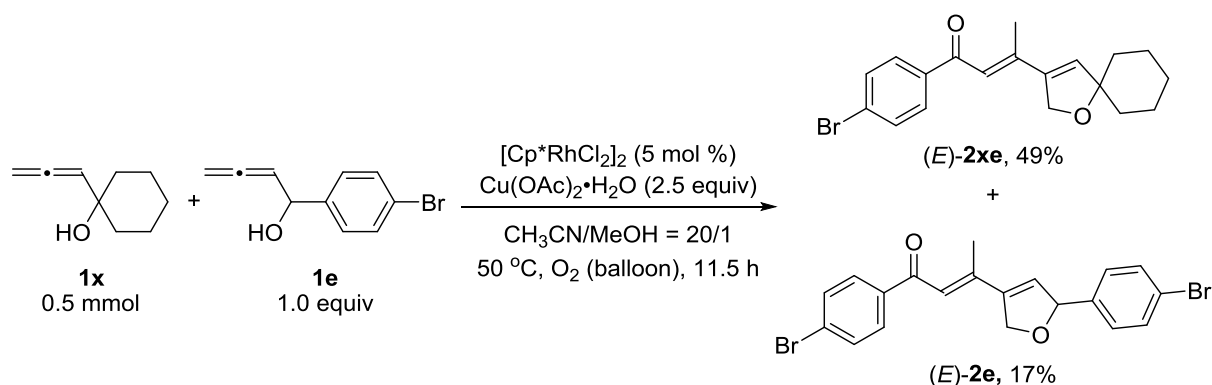

To a dried Schlenk tube were added  $[Cp^*RhCl_2]_2$  (15.5 mg, 0.025 mmol) and  $Cu(OAc)_2 \cdot H_2O$  (250.0 mg, 1.25 mmol) under air atmosphere. The Schlenk tube was then degassed to remove the air inside completely and refilled with  $O_2$  by a balloon of  $O_2$  for three

times. **1x** (70.5 mg, 0.5 mmol)/CH<sub>3</sub>CN (0.5 mL), **1e** (112.8 mg, 0.5 mmol)/CH<sub>3</sub>CN (0.5 mL) and MeOH (50 μL) were added sequentially, the reaction tube was put into an oil bath pre-heated at 50 °C. The reaction was complete after stirring for 11.5 h as monitored by TLC. After removing the O<sub>2</sub> balloon, the resulting mixture was filtered through a short column of silica gel eluted with ethyl acetate (15 mL × 3). The combined filtrate was then concentrated in vacuo and the crude residue was purified via chromatography on silica gel [eluent: petroleum ether/ethyl acetate = 50/1 (250 mL) to petroleum ether/ethyl acetate = 20/1 (250 mL)] to afford (*E*)-**2xe** (88.9 mg, 49%) and impure (*E*)-**2e** (20.2 mg). The impure (*E*)-**2e** was further purified via column chromatography on silica gel (eluent: petroleum ether/ethyl acetate = 25/1, 500 mL) to afford pure (*E*)-**2e** (18.6 mg, 17%).

(*E*)-**2xe**, solid; m.p. 105.5-107.6 °C (petroleum ether/DCM); <sup>1</sup>H NMR (300 MHz, CDCl<sub>3</sub>) δ 7.76 (d, *J* = 6.6 Hz, 2 H, ArH), 7.60 (d, *J* = 6.6 Hz, 2 H, ArH), 6.41 (s, 1 H, =CH), 6.38 (s, 1 H, =CH), 4.88 (d, *J* = 1.2 Hz, 2 H, OCH<sub>2</sub>), 2.36 (d, *J* = 0.9 Hz, 3 H, Me), 1.80-1.35 (m, 10 H, CH<sub>2</sub> × 5); <sup>13</sup>C NMR (75 MHz, CDCl<sub>3</sub>) δ 190.8, 146.7, 140.0, 137.8, 137.7, 131.8, 129.7, 127.7, 120.7, 90.7, 72.6, 36.6, 25.2, 23.2, 16.7; IR (neat) ν (cm<sup>-1</sup>) 2931, 2854, 1656, 1588, 1212, 1071, 1042, 1009; MS (EI): *m/z* (%) 362 [(M(<sup>81</sup>Br)<sup>+</sup>), 42.42], 360 [(M(<sup>79</sup>Br)<sup>+</sup>), 41.69], 183 (100); HRMS Calcd for C<sub>19</sub>H<sub>21</sub><sup>79</sup>BrO<sub>2</sub> (M<sup>+</sup>): 360.0725; Found: 360.0723.

#### 24. Synthesis of (*S,E*)-1-phenyl-3-(2-phenyl-2,5-dihydrofuran-4-yl)but-2-en-1-one (*S,E*)-**2a**.

(wxy-3-112)

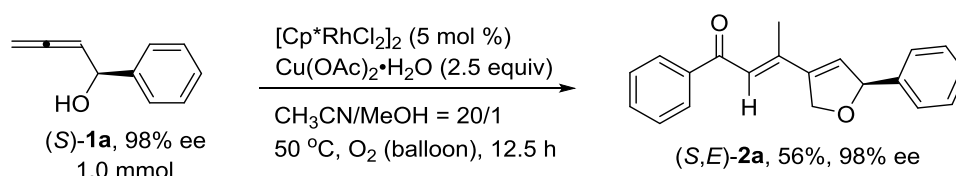

Following **Typical Procedure II**, the reaction of (*S*)-**1a**<sup>2,3</sup> (146.2 mg, 1.0 mmol), [Cp\**RhCl*<sub>2</sub>]<sub>2</sub> (31.0 mg, 0.05 mmol), and Cu(OAc)<sub>2</sub>•H<sub>2</sub>O (499.8 mg, 2.5 mmol) in CH<sub>3</sub>CN (1.0 mL)/MeOH (50 μL) afforded (*S,E*)-**2a** (81.1 mg, 56%) (eluent: petroleum ether/ethyl acetate = 25/1, 800 mL): solid; m.p. 82.4-82.7 °C (petroleum ether/ethyl acetate); 98% ee (HPLC conditions: Chiralcel IC column, *n*-hexane/*i*-PrOH = 90/10, 1 mL/min, λ = 214 nm, *t*<sub>R</sub>(major) = 21.9 min, *t*<sub>R</sub>(minor) = 24.2 min); [α]<sub>D</sub><sup>20</sup> = -345.8 (*c* = 1.16, CHCl<sub>3</sub>); <sup>1</sup>H NMR (300 MHz, CDCl<sub>3</sub>) δ 7.96-7.88 (m, 2 H, ArH), 7.57 (m, 1 H, ArH), 7.48 (m, 2 H, ArH), 7.42-7.27 (m, 5 H, ArH), 6.57 (s, 1 H, =CH), 6.34 (q, *J*<sub>1</sub> = 3.6 Hz, *J*<sub>2</sub> = 1.5 Hz, 1 H, =CH), 6.00-5.96 (m, 1 H, OCH), 5.17 (ddd, *J*<sub>1</sub> = 11.4 Hz, *J*<sub>2</sub> = 5.4 Hz, *J*<sub>3</sub> = 2.1 Hz, 1 H, one proton of OCH<sub>2</sub>), 5.03 (ddd, *J*<sub>1</sub> = 11.4 Hz, *J*<sub>2</sub> = 5.4 Hz, *J*<sub>3</sub> = 2.1 Hz, 1 H, one proton of OCH<sub>2</sub>), 2.37 (d, *J* = 1.2 Hz, 3 H, Me); <sup>13</sup>C NMR (100 MHz, CDCl<sub>3</sub>) δ 192.0, 145.0, 141.5, 141.1, 138.9, 132.9, 132.8, 128.7, 128.6, 128.2, 128.1, 126.4, 122.3, 89.1, 74.9, 16.7; IR (KBr) ν (cm<sup>-1</sup>) 3089, 3065, 3035, 2854, 1651, 1612, 1595, 1581, 1492, 1479, 1455, 1446, 1366, 1350, 1274, 1243, 1218, 1196, 1182, 1160, 1088, 1075, 1049, 1009; MS (EI): *m/z* (%) 290 (M<sup>+</sup>, 8.48), 185 (100); Anal. Calcd. for C<sub>20</sub>H<sub>18</sub>O<sub>2</sub> (%): C, 82.73; H, 6.25; Found: C, 82.01; H, 6.31. HRMS Calcd. for C<sub>20</sub>H<sub>18</sub>O<sub>2</sub> (M<sup>+</sup>): 290.1307; Found: 290.1307.

## 25. Synthesis of (*S,E*)-1-(4-fluorophenyl)-3-(2-(4-fluorophenyl)-2,5-dihydrofuran-4-yl)-

but-2-en-1-one (*S,E*)-**2b**. (wxy-3-044)

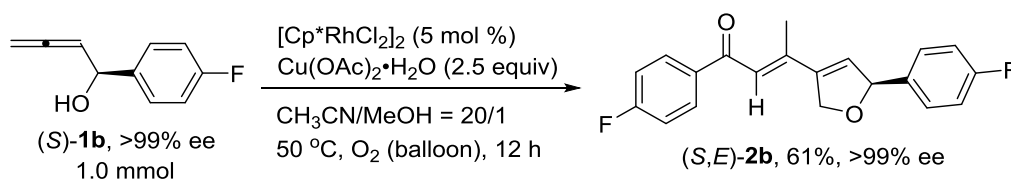

Following **Typical Procedure II**, the reaction of (*S*)-**1b** (164.6 mg, 1.0 mmol, >99% ee),

[Cp\*RhCl<sub>2</sub>]<sub>2</sub> (31.0 mg, 0.05 mmol), and Cu(OAc)<sub>2</sub>•H<sub>2</sub>O (498.9 mg, 2.5 mmol) in CH<sub>3</sub>CN (1.0 mL)/MeOH (50 μL) afforded (*S,E*)-**2b** (99.8 mg, 61%) (eluent: petroleum ether/ethyl acetate = 15/1, 500 mL): solid; m.p. 90.5-91.1 °C (petroleum ether/CH<sub>2</sub>Cl<sub>2</sub>); >99% ee (HPLC conditions: Chiralcel OZ-H column, *n*-hexane/*i*-PrOH = 90/10, 1 mL/min, λ = 214 nm, *t*<sub>R</sub>(major) = 9.8 min, *t*<sub>R</sub>(minor) = 13.6 min); [α]<sub>D</sub><sup>20</sup> = -323.7 (*c* = 1.01, CHCl<sub>3</sub>); <sup>1</sup>H NMR (300 MHz, CDCl<sub>3</sub>) δ 8.01-7.90 (m, 2 H, ArH), 7.36-7.25 (m, 2 H, ArH), 7.20-7.09 (m, 2 H, ArH), 7.09-7.00 (m, 2 H, ArH), 6.53 (s, 1 H, =CH), 6.31 (q, *J* = 1.8 Hz, 1 H, =CH), 5.98-5.87 (m, 1 H, OCH), 5.14 (ddd, *J*<sub>1</sub> = 11.7 Hz, *J*<sub>2</sub> = 5.7 Hz, *J*<sub>3</sub> = 2.1 Hz, 1 H, one proton of OCH<sub>2</sub>), 5.01 (ddd, *J*<sub>1</sub> = 11.7 Hz, *J*<sub>2</sub> = 3.6 Hz, *J*<sub>3</sub> = 2.1 Hz, 1 H, one proton of OCH<sub>2</sub>), 2.36 (d, *J* = 0.9 Hz, 3 H, CH<sub>3</sub>); <sup>13</sup>C NMR (75 MHz, CDCl<sub>3</sub>) δ 190.2, 165.5 (d, *J* = 253.1 Hz), 162.5 (d, *J* = 245.4 Hz), 145.0, 141.6, 136.8 (d, *J* = 3.5 Hz), 135.2 (d, *J* = 2.7 Hz), 132.6, 130.8 (d, *J* = 9.7 Hz), 128.2 (d, *J* = 8.3 Hz), 122.0, 115.6 (d, *J* = 21.4 Hz), 115.5 (d, *J* = 21.4 Hz), 88.3, 74.7, 16.6; <sup>19</sup>F NMR (282 MHz, CDCl<sub>3</sub>) δ -105.9 (s, 1 F), -114.4 (s, 1 F); IR (neat) ν (cm<sup>-1</sup>) 3073, 2851, 1622, 1652, 1600, 1506, 1411, 1368, 1305, 1295, 1221, 1155, 1088, 1049, 1013; MS (EI): *m/z* (%) 326 (M<sup>+</sup>, 5.52), 123 (100); Anal. Calcd. for C<sub>20</sub>H<sub>16</sub>F<sub>2</sub>O<sub>2</sub> (%): C, 73.61; H, 4.94; Found: C, 73.64; H, 5.11.

## 26. Synthesis

of

(*S,E*)-1-(3-bromophenyl)-3-(2-(3-bromophenyl)-2,5-dihydrofuran-4-yl)but-2-en-1-one

(*S,E*)-**2e**. (wxy-3-109)

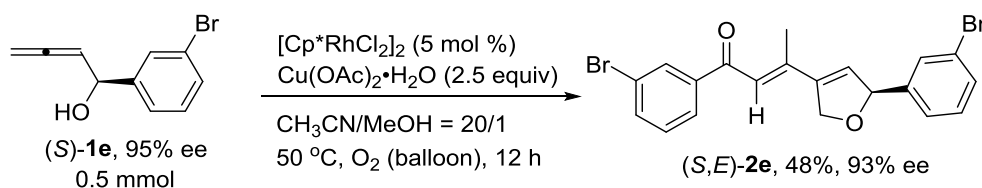

Following **Typical Procedure II**, the reaction of (*S*)-**1e** (112.1 mg, 0.5 mmol, 95% ee),

[Cp\*RhCl<sub>2</sub>]<sub>2</sub> (15.7 mg, 0.025 mmol), and Cu(OAc)<sub>2</sub>•H<sub>2</sub>O (250.0 mg, 1.25 mmol) in CH<sub>3</sub>CN (0.5 mL)/MeOH (25 μL) afforded (*S,E*)-**2e** (54.0 mg, 48%) (eluent: petroleum ether/ethyl acetate = 25/1, 800 mL): oil; 93% ee (HPLC conditions: Chiralcel IC column, *n*-hexane/*i*-PrOH = 90/10, 1 mL/min, λ = 214 nm, *t*<sub>R</sub>(minor) = 17.7 min, *t*<sub>R</sub>(major) = 18.7 min); [α]<sub>D</sub><sup>20</sup> = -258.2 (*c* = 0.91, CHCl<sub>3</sub>); <sup>1</sup>H NMR (300 MHz, CDCl<sub>3</sub>) δ 8.03 (t, *J* = 1.7 Hz, 1 H, ArH), 7.83 (d, *J* = 7.8 Hz, 1 H, ArH), 7.72-7.64 (m, 1 H, ArH), 7.52-7.38 (m, 2 H, ArH), 7.36 (t, *J* = 7.8 Hz, 1 H, ArH), 7.30-7.19 (m, 2 H, ArH), 6.49 (s, 1 H, =CH), 6.33 (q, *J* = 1.5 Hz, 1 H, =CH), 5.97-5.88 (m, 1 H, OCH), 5.16 (ddd, *J*<sub>1</sub> = 11.4 Hz, *J*<sub>2</sub> = 5.4 Hz, *J*<sub>3</sub> = 1.8 Hz, 1 H, one proton of OCH<sub>2</sub>), 5.03 (ddd, *J*<sub>1</sub> = 11.1 Hz, *J*<sub>2</sub> = 3.3 Hz, *J*<sub>3</sub> = 1.8 Hz, 1 H, one proton of OCH<sub>2</sub>), 2.36 (s, 3 H, CH<sub>3</sub>); <sup>13</sup>C NMR (75 MHz, CDCl<sub>3</sub>) δ 190.2, 145.8, 143.3, 141.7, 140.6, 135.6, 132.7, 131.2, 131.1, 130.22, 130.18, 129.3, 126.7, 124.9, 122.9, 122.8, 121.8, 88.2, 75.0, 16.8; IR (KBr) ν (cm<sup>-1</sup>) 3062, 2955, 2850, 1660, 1592, 1571, 1472, 1428, 1367, 1296, 1240, 1211, 1101, 1084, 1070, 1054; MS (EI): *m/z* (%) 450 [(M(<sup>81</sup>Br<sup>81</sup>Br)<sup>+</sup>, 4.30], 448 [(M(<sup>81</sup>Br<sup>79</sup>Br)<sup>+</sup>, 9.42], 446 [(M(<sup>79</sup>Br<sup>79</sup>Br)<sup>+</sup>, 7.12], 265 (100); HRMS Calcd. for C<sub>20</sub>H<sub>16</sub>O<sub>2</sub><sup>79</sup>Br<sup>79</sup>Br (M<sup>+</sup>): 445.9512; Found: 445.9517.

## 27. Synthesis of (*S,E*)-1-(furan-2-yl)-3-(2-(furan-2-yl)-2,5-dihydrofuran-4-yl)-but-2-en-1-one

(*S,E*)-**2j**. (wxy-3-116)

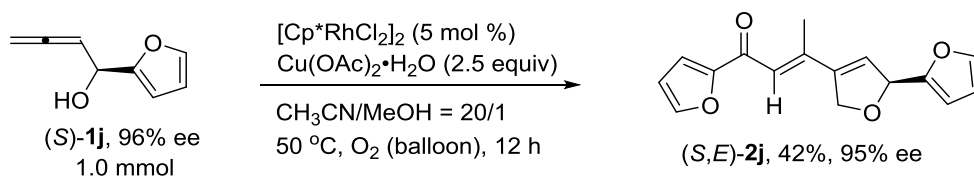

Following **Typical Procedure II**, the reaction of (*S*)-**1j** (136.5 mg, 1.0 mmol, 96% purity, 96% ee), [Cp\*RhCl<sub>2</sub>]<sub>2</sub> (31.0 mg, 0.05 mmol), and Cu(OAc)<sub>2</sub>•H<sub>2</sub>O (500.0 mg, 2.5 mmol) in

CH<sub>3</sub>CN (1.0 mL)/MeOH (50 μL) afforded (*S,E*)-**2j** (55.2 mg, 42%) (eluent: petroleum ether/ethyl acetate = 20/1, 1600 mL): solid; m.p. 87.5-88.1 °C (determined without recrystallization); 95% ee (HPLC conditions: Chiralcel OD-H column, *n*-hexane/*i*-PrOH = 85/15, 1 mL/min, λ = 220 nm, *t*<sub>R</sub>(major) = 23.4 min, *t*<sub>R</sub>(minor) = 19.0 min); [α]<sub>D</sub><sup>20</sup> = -295.6 (*c* = 1.01, CHCl<sub>3</sub>); <sup>1</sup>H NMR (300 MHz, CDCl<sub>3</sub>) δ 7.60 (d, *J* = 0.9 Hz, 1 H, furyl), 7.46-7.36 (m, 1 H, furyl), 7.20 (dd, *J*<sub>1</sub> = 3.6 Hz, *J*<sub>2</sub> = 0.6 Hz, 1 H, furyl), 6.58-6.50 (m, 2 H, furyl and =CH), 6.39-6.27 (m, 3 H, furyl and =CH), 5.99-5.93 (m, 1 H, OCH), 5.08 (ddd, *J*<sub>1</sub> = 11.7 Hz, *J*<sub>2</sub> = 5.4 Hz, *J*<sub>3</sub> = 2.1 Hz, 1 H, one proton of OCH<sub>2</sub>), 4.94 (ddd, *J*<sub>1</sub> = 11.4 Hz, *J*<sub>2</sub> = 3.3 Hz, *J*<sub>3</sub> = 2.1 Hz, 1 H, one proton of OCH<sub>2</sub>), 2.49 (d, *J* = 0.9 Hz, 3 H, CH<sub>3</sub>); <sup>13</sup>C NMR (75 MHz, CDCl<sub>3</sub>) δ 179.3, 154.3, 152.9, 146.04, 146.01, 143.4, 142.9, 129.5, 120.5, 116.7, 112.4, 110.3, 107.8, 81.6, 74.2, 16.5; IR (neat) ν (cm<sup>-1</sup>) 3123, 2963, 2853, 1651, 1591, 1465, 1387, 1305, 1257, 1153, 1092, 1052, 1013; MS (EI): *m/z* (%) 270 (M<sup>+</sup>, 4.56), 95 (100); HRMS Calcd. for C<sub>16</sub>H<sub>14</sub>O<sub>4</sub> (M<sup>+</sup>): 270.0887; Found: 270.0886.

28. Synthesis of (*R,E*)-2-(2-hexyl-2,5-dihydrofuran-4-yl)dec-2-en-4-one (*R,E*)-**2m**.

(wxy-3-113)

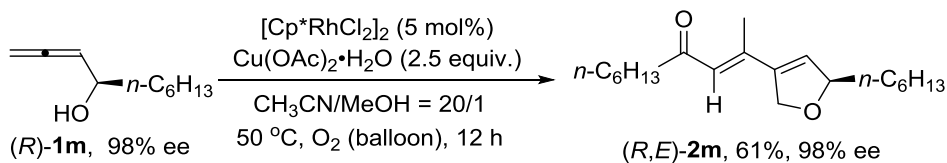

Following **Typical Procedure II**, the reaction of (*S*)-**1m**<sup>2,4</sup> (154.9 mg, 1.0 mmol, , 98% ee), [Cp\**RhCl*<sub>2</sub>]<sub>2</sub> (31.0 mg, 0.05 mmol), and Cu(OAc)<sub>2</sub>·H<sub>2</sub>O (499.9 mg, 2.5 mmol) in CH<sub>3</sub>CN (1 mL)/MeOH (50 μL) afforded (*R,E*)-**2m** (93.3 mg, 61%) (eluent: petroleum ether/ethyl acetate = 50/1, 700 mL): liquid; 98% ee (HPLC conditions: Chiralcel IC

column, *n*-hexane/*i*-PrOH = 99/1, 1.0 mL/min,  $\lambda = 220$  nm,  $t_R(\text{major}) = 9.4$  min,  $t_R(\text{minor}) = 11.2$  min;  $[\alpha]_D^{20} = -106.0$  ( $c = 1.37$ ,  $\text{CHCl}_3$ );  $^1\text{H NMR}$  (300 MHz,  $\text{CDCl}_3$ )  $\delta$  6.24 (q,  $J = 1.8$  Hz, 1 H, =CH), 5.80 (s, 1 H, =CH), 5.01-4.90 (m, 1 H, OCH), 4.82 (ddd,  $J_1 = 11.4$  Hz,  $J_2 = 5.4$  Hz,  $J_2 = 1.8$  Hz, 1 H, one proton of  $\text{OCH}_2$ ), 4.74 (ddd,  $J_1 = 11.1$  Hz,  $J_2 = 3.6$  Hz,  $J_3 = 1.8$  Hz, 1 H, one proton of  $\text{OCH}_2$ ), 2.47 (t,  $J = 7.5$  Hz, 2 H,  $\text{CH}_2$ ), 2.32 (s, 3 H, Me), 1.68-1.50 (m, 4 H,  $\text{CH}_2 \times 2$ ), 1.45-1.19 (m, 14 H,  $\text{CH}_2 \times 7$ ), 0.88 (t,  $J = 6.6$  Hz, 6 H,  $\text{Me} \times 2$ );  $^{13}\text{C NMR}$  (75 MHz,  $\text{CDCl}_3$ )  $\delta$  201.8, 143.9, 141.3, 133.6, 123.5, 87.3, 73.9, 44.8, 35.7, 31.7, 31.6, 29.3, 28.8, 25.2, 24.1, 22.5, 22.4, 16.0, 14.01, 13.97; IR (neat)  $\nu$  ( $\text{cm}^{-1}$ ) 2955, 2928, 2856, 1683, 1616, 1589, 1466, 1454, 1405, 1367, 1263, 1132, 1100, 1053; MS (ED):  $m/z$  (%) 306 ( $\text{M}^+$ , 9.28), 221 (100); HRMS Calcd. for  $\text{C}_{20}\text{H}_{34}\text{NaO}_2$  ( $\text{M}^+ + \text{Na}$ ): 329.2457; Found: 329.2453.

29. Synthesis of (*S,E*)-2-(2-nonyl-2,5-dihydrofuran-4-yl)tridec-2-en-4-one (*S,E*)-**2n**.  
(wxy-3-043)

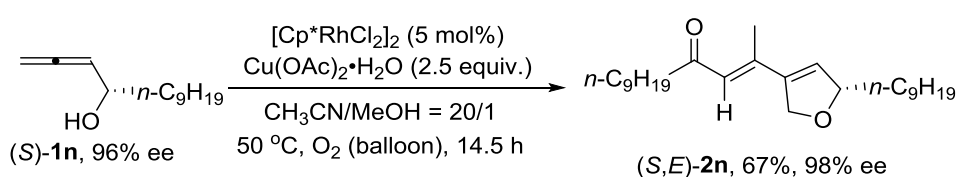

Following **Typical Procedure II**, the reaction of (*S*)-**1n** (196.3 mg, 1.0 mmol, 96% ee),  $[\text{Cp}^*\text{RhCl}_2]_2$  (30.9 mg, 0.05 mmol), and  $\text{Cu}(\text{OAc})_2 \cdot \text{H}_2\text{O}$  (499.3 mg, 2.5 mmol) in  $\text{CH}_3\text{CN}$  (1 mL)/ $\text{MeOH}$  (50  $\mu\text{L}$ ) afforded (*S,E*)-**2n** (130.5 mg, 67%) (eluent: petroleum ether /ethyl acetate = 50/1, 800 mL): solid; m.p. 38.5-42.7  $^\circ\text{C}$  (determined without recrystallization); 98% ee (HPLC conditions: Chiralcel IC column, *n*-hexane/*i*-PrOH = 99/1, 0.7 mL/min,  $\lambda = 254$  nm,  $t_R(\text{minor}) = 13.0$  min,  $t_R(\text{major}) = 15.1$  min);  $[\alpha]_D^{20} =$



+89.3 ( $c = 1.00$ ,  $\text{CHCl}_3$ );  $^1\text{H NMR}$  (300 MHz,  $\text{CDCl}_3$ )  $\delta$  6.23 (q,  $J = 1.8$  Hz, 1 H, =CH), 5.80 (s, 1 H, =CH), 5.00-4.89 (m, 1 H, OCH), 4.81 (ddd,  $J_1 = 11.4$  Hz,  $J_2 = 5.1$  Hz,  $J_2 = 2.1$  Hz, 1 H, one proton of  $\text{OCH}_2$ ), 4.74 (ddd,  $J_1 = 11.4$  Hz,  $J_2 = 3.6$  Hz,  $J_2 = 1.8$  Hz, 1 H, one proton of  $\text{OCH}_2$ ), 2.46 (t,  $J = 7.4$  Hz, 2 H,  $\text{CH}_2$ ), 2.32 (s, 3 H,  $\text{CH}_3$ ), 1.67-1.50 (m, 4 H,  $\text{CH}_2 \times 2$ ), 1.48-1.18 (m, 26 H,  $\text{CH}_2 \times 13$ ), 0.88 (t,  $J = 6.6$  Hz, 6 H,  $\text{CH}_3 \times 2$ );  $^{13}\text{C NMR}$  (75 MHz,  $\text{CDCl}_3$ )  $\delta$  201.8, 143.9, 141.3, 133.6, 123.5, 87.3, 74.0, 44.8, 35.7, 31.8, 29.6, 29.53, 29.50, 29.4, 29.3, 29.22, 29.19, 25.3, 24.2, 22.6, 16.1, 14.1; IR (neat)  $\nu$  ( $\text{cm}^{-1}$ ) 2956, 2925, 2854, 1687, 1684, 1616, 1589, 1466, 1405, 1367, 1131, 1103, 1047; MS (EI):  $m/z$  (%) 390 ( $\text{M}^+$ , 8.57), 263 (100); Anal. Calcd. for  $\text{C}_{26}\text{H}_{46}\text{O}_2$  (%): C, 79.94; H, 11.87; Found: C, 79.99; H, 11.52.

30. Synthesis of  $(S, E)$ -1-(4-bromophenyl)-3-(2-(4-bromophenyl)-2,5-dihydrofuran-4-yl)but-2-en-1-one  $(S, E)$ -**2f** and  $(E)$ -**8f**. (wxy-5-019)

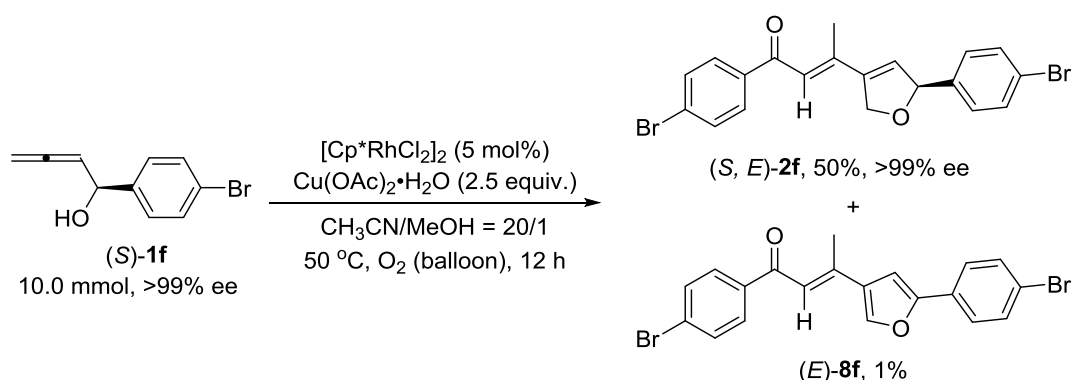

Following **Typical Procedure II**, the reaction of  $(S)$ -**1f**<sup>2,5</sup> (2.2596 g, 10.0 mmol, >99% ee),  $[\text{Cp}^*\text{RhCl}_2]_2$  (310.5 mg, 0.5 mmol), and  $\text{Cu}(\text{OAc})_2 \cdot \text{H}_2\text{O}$  (5.0081 g, 25 mmol) in  $\text{CH}_3\text{CN}$  (10 mL)/ $\text{MeOH}$  (0.5 mL) afforded  $(S, E)$ -**2f** (1.1240 g, 52%) and  $(E)$ -**8f** (31.6 mg, 1%) [eluent:

petroleum ether/ethyl acetate = 50/1 (500 mL) to petroleum ether/ethyl acetate = 20/1 (800 mL)].

(*S, E*)-**2f**: solid; m.p. 123.3-123.6 °C (petroleum ether/CH<sub>2</sub>Cl<sub>2</sub>); >99% ee (HPLC conditions: Chiralcel IC column, *n*-hexane/*i*-PrOH = 90/10, 0.8 mL/min,  $\lambda$  = 254 nm,  $t_R$ (major) = 18.9 min,  $t_R$ (minor) = 15.7 min);  $[\alpha]_D^{20}$  = -344.3 ( $c$  = 0.535, CHCl<sub>3</sub>); <sup>1</sup>H NMR (300 MHz, CDCl<sub>3</sub>)  $\delta$  7.78 (d,  $J$  = 8.4 Hz, 2 H, ArH), 7.61 (d,  $J$  = 8.7 Hz, 2 H, ArH), 7.50 (d,  $J$  = 8.4 Hz, 2 H, ArH), 7.21 (d,  $J$  = 8.4 Hz, 2 H, ArH), 6.50 (s, 1 H, =CH), 6.31 (q,  $J$  = 1.8 Hz, 1 H, =CH), 5.98-5.82 (m, 1 H, OCH), 5.14 (ddd,  $J_1$  = 11.4 Hz,  $J_2$  = 5.4 Hz,  $J_3$  = 1.8 Hz, 1 H, one proton of OCH<sub>2</sub>), 5.01 (ddd,  $J_1$  = 11.4 Hz,  $J_2$  = 3.6 Hz,  $J_3$  = 2.0 Hz, 1 H, one proton of OCH<sub>2</sub>), 2.35 (d,  $J$  = 0.9 Hz, 3 H, CH<sub>3</sub>); <sup>13</sup>C NMR (75 MHz, CDCl<sub>3</sub>)  $\delta$  190.7, 145.4, 141.7, 140.0, 137.6, 132.7, 131.9, 131.8, 129.7, 128.0, 127.9, 122.0, 121.8, 88.4, 74.9, 16.7; IR (KBr)  $\nu$  (cm<sup>-1</sup>) 3089, 2855, 1654, 1614, 1591, 1246, 1216, 1111, 1093, 1070, 1050, 1006; MS (EI):  $m/z$  (%) 450 [(M(<sup>81</sup>Br<sup>81</sup>Br))<sup>+</sup>, 3.46], 448 [(M(<sup>81</sup>Br<sup>79</sup>Br))<sup>+</sup>, 2.46], 446 [(M(<sup>79</sup>Br<sup>79</sup>Br))<sup>+</sup>, 0.77], 183 (100); Anal. Calcd. for C<sub>20</sub>H<sub>16</sub>Br<sub>2</sub>O<sub>2</sub> (%): C, 53.60; H, 3.60; Found: C, 53.36; H, 3.52.

(*E*)-**8f**: solid; <sup>1</sup>H NMR (300 MHz, CDCl<sub>3</sub>)  $\delta$  7.84 (d,  $J$  = 8.7 Hz, 2 H, ArH), 7.77 (s, 1 H, ArH), 7.63-7.28 (m, 6 H, ArH and =CH), 7.10 (s, 1 H, =CH), 6.92 (s, 1 H, =CH), 2.52 (s, 3 H, CH<sub>3</sub>); <sup>13</sup>C NMR (75 MHz, CDCl<sub>3</sub>)  $\delta$  190.3, 154.4, 146.6, 142.4, 138.2, 132.0, 131.8, 130.6, 129.7, 128.9, 127.5, 125.5, 122.0, 118.6, 102.7, 17.6.

## Synthetic Applications

### 1. Preparation of (*S,E*)-**3f**. (wxy-5-038)

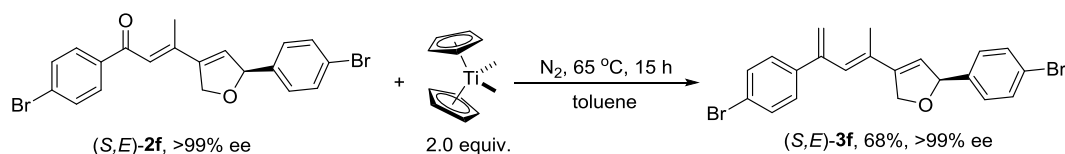

**Typical Procedure III:** To a Schlenk tube were added (*S,E*)-**2f** (89.5 mg, 0.2 mmol), evacuated and backfilled with nitrogen three times. Then, CpTiMe<sub>2</sub> (0.4 mmol, 4 mL, 0.1 M in toluene, which was prepared according to literature<sup>7</sup>) was added via a syringe. The reaction tube was put into a pre-heated 65 °C oil bath. The reaction was complete after 15 h as monitored by TLC (eluent: petroleum ether/ethyl acetate = 10/1). Ethyl acetate (5 mL) was added to dilute the reaction mixture, which was filtered through a celite pad and eluted with ethyl acetate (20 mL × 3). The combined filtrate was then concentrated in vacuo and the crude residue was purified via chromatography on silica gel (eluent: petroleum ether/ethyl acetate = 50/1, 300 mL) to afford (*S,E*)-**3f** (60.7 mg, 68%): solid; 62.6-64.3 °C (determined without recrystallization); >99% ee (HPLC conditions: Chiralcel IA column, *n*-hexane/*i*-PrOH = 90/10, 0.7 mL/min, λ = 254 nm, *t*<sub>R</sub>(major) = 9.6 min, *t*<sub>R</sub>(minor) = 10.7 min); [α]<sub>D</sub><sup>20</sup> = -196.5 (c = 0.46, CHCl<sub>3</sub>); <sup>1</sup>H NMR (300 MHz, CDCl<sub>3</sub>) δ 7.56-7.36 (m, 4 H, ArH), 7.30-7.12 (m, 4 H, ArH), 5.97 (s, 1 H, =CH), 5.92-5.76 (m, 2 H, =CH and OCH), 5.63 (s, 1 H, one proton of =CH<sub>2</sub>), 5.21 (s, 1 H, one proton of =CH<sub>2</sub>), 5.16-5.04 (m, 1 H, one proton of OCH<sub>2</sub>), 5.02-4.90 (m, 1 H, one proton of OCH<sub>2</sub>), 1.89 (d, *J* = 0.9 Hz, 3 H, Me); <sup>13</sup>C NMR (75 MHz, CDCl<sub>3</sub>) δ 143.5, 141.9, 141.1, 139.5, 131.9, 131.6, 131.5, 128.4, 128.2, 128.0, 126.0, 121.8, 121.6, 117.0, 88.1, 75.3, 16.0; IR (neat) ν (cm<sup>-1</sup>) 3088, 2950, 2920, 2850, 1484, 1403, 1390, 1108, 1100, 1087, 1070, 1052, 1008; MS (EI): *m/z* (%) 448 [(M(<sup>81</sup>Br<sup>81</sup>Br))<sup>+</sup>,

45.87], 446 [(M(<sup>81</sup>Br<sup>79</sup>Br)<sup>+</sup>, 94.71], 444 [(M(<sup>79</sup>Br<sup>79</sup>Br)<sup>+</sup>, 58.76], 183 (100); HRMS Calcd. for C<sub>21</sub>H<sub>18</sub>O<sup>79</sup>Br<sup>79</sup>Br (M<sup>+</sup>): 443.9724; Found: 443.9724.

## 2. Preparation of (±)-**3f**. (wxy-5-037)

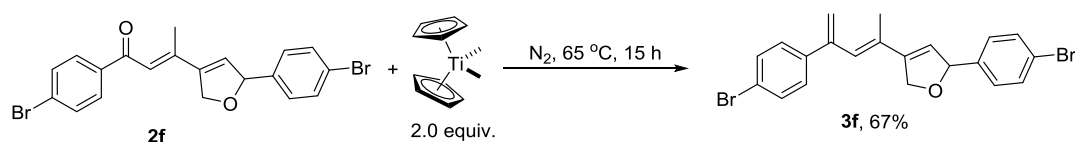

Following **Typical Procedure III**, The reaction of **2f** (89.7 mg, 0.2 mmol) and CpTiMe<sub>2</sub><sup>7</sup> (0.4 mmol, 4 mL, 0.1 M in toluene) afforded **3f** (60.0 mg, 67%) (eluent: petroleum ether/ethyl acetate = 50/1, 300 mL): solid; 63.7-65.9 °C (determined without recrystallization); <sup>1</sup>H NMR (300 MHz, CDCl<sub>3</sub>) δ 7.52-7.43 (m, 4 H, ArH), 7.28-7.17 (m, 4 H, ArH), 5.97 (s, 1 H, =CH), 5.92-5.80 (m, 2 H, =CH and OCH), 5.64 (s, 1 H, one proton of =CH<sub>2</sub>), 5.22 (s, 1 H, one proton of =CH<sub>2</sub>), 5.15-5.04 (m, 1 H, one proton of OCH<sub>2</sub>), 5.02-4.92 (m, 1 H, one proton of OCH<sub>2</sub>), 1.90 (s, 3 H, Me); <sup>13</sup>C NMR (75 MHz, CDCl<sub>3</sub>) δ 143.6, 141.9, 141.1, 139.5, 131.9, 131.6, 131.5, 128.4, 128.3, 128.1, 126.0, 121.8, 121.7, 117.0, 88.1, 75.3, 16.1; IR (neat) ν (cm<sup>-1</sup>) 3087, 2951, 2849, 1484, 1404, 1390, 1108, 1101, 1086, 1070, 1051, 1008; MS (EI): *m/z* (%) 448 [(M(<sup>81</sup>Br<sup>81</sup>Br)<sup>+</sup>, 43.27], 446 [(M(<sup>81</sup>Br<sup>79</sup>Br)<sup>+</sup>, 86.73], 444 [(M(<sup>79</sup>Br<sup>79</sup>Br)<sup>+</sup>, 52.13], 183 (100); HRMS Calcd. for C<sub>21</sub>H<sub>18</sub>O<sup>79</sup>Br<sup>79</sup>Br (M<sup>+</sup>): 443.9724; Found: 443.9723.

## 3. Preparation of (S,E)-**4f**. (wxy-5-032)

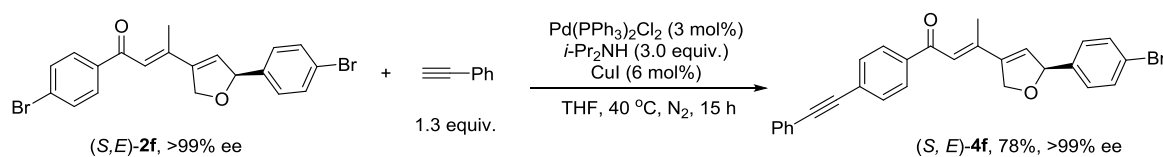

**Typical Procedure IV:** To a Schlenk tube were added Pd(PPh<sub>3</sub>)<sub>2</sub>Cl<sub>2</sub> (4.2 mg, 0.006 mmol) and CuI (2.4 mg, 0.013 mmol), evacuated and backfilled with nitrogen three times, freshly distilled THF (1.6 mL), *i*-Pr<sub>2</sub>NH (85 μL, d = 0.717 g/mL, 60.9 mg, 0.6 mmol), (*S*)-**2f** (90.0 mg, 0.2 mmol), and phenylacetylene (28.5 μL, d = 0.93 g/mL, 26.5 mg, 0.26 mmol) were added sequentially. Then, the reaction tube was put into a pre-heated 40 °C oil bath. The reaction was complete after 15 h as monitored by TLC (eluent: petroleum ether/acetone = 10/1). The resulting mixture was filtered through a celite pad and eluted with ethyl acetate (20 mL × 3). The combined filtrate was then concentrated in vacuo and the crude residue was purified via chromatography on silica gel (eluent: petroleum ether/acetone = 20/1, 500 mL) to afford (*S,E*)-**4f** (73.2 mg, 78%): solid; m.p. 152.4-153.6 °C (petroleum ether/DCM); >99% ee (HPLC conditions: Chiralcel IA column, *n*-hexane/*i*-PrOH = 90/10, 1.3 mL/min, λ = 254 nm, t<sub>R</sub>(major) = 12.8 min, t<sub>R</sub>(minor) = 14.2 min); [α]<sub>D</sub><sup>20</sup> = -426.0 (c = 0.67, CHCl<sub>3</sub>); <sup>1</sup>H NMR (300 MHz, CDCl<sub>3</sub>) δ 7.90 (d, *J* = 8.4 Hz, 2 H, ArH), 7.61 (d, *J* = 8.1 Hz, 2 H, ArH), 7.58-7.52 (m, 2 H, ArH), 7.49 (d, *J* = 8.4 Hz, 2 H, ArH), 7.42-7.31 (m, 3 H, ArH), 7.20 (d, *J* = 8.4 Hz, 2 H, ArH), 6.54 (s, 1 H, =CH), 6.28 (q, *J* = 1.5 Hz, 1 H, =CH), 5.98-5.83 (m, 1 H, =CH), 5.16 (ddd, *J*<sub>1</sub> = 11.4 Hz, *J*<sub>2</sub> = 5.4 Hz, *J*<sub>3</sub> = 1.8 Hz, 1 H, one proton of OCH<sub>2</sub>), 5.02 (ddd, *J*<sub>1</sub> = 11.4 Hz, *J*<sub>2</sub> = 3.6 Hz, *J*<sub>3</sub> = 1.8 Hz, 1 H, one proton of OCH<sub>2</sub>), 2.35 (s, 3 H, Me); <sup>13</sup>C NMR (75 MHz, CDCl<sub>3</sub>) δ 190.8, 145.0, 141.8, 140.1, 137.9, 132.4, 131.72, 131.69, 128.8, 128.4, 128.2, 128.0, 127.9, 122.6, 122.2, 121.9, 92.7, 88.7, 88.3, 74.9, 16.7; IR (neat) ν (cm<sup>-1</sup>) 2916, 2857, 1652, 1602, 1485, 1442, 1406, 1240, 1216, 1049, 1010; MS (EI): *m/z* (%) 470 [M(<sup>81</sup>Br)<sup>+</sup>, 91.53], 468 [M(<sup>79</sup>Br)<sup>+</sup>, 75.55], 263 (100); Anal. Calcd. for C<sub>28</sub>H<sub>21</sub>BrO<sub>2</sub> (%): C, 71.65; H, 4.51; Found: C, 71.40; H, 4.50.

#### 4. Preparation of ( $\pm$ )-**4f**. (wxy-5-026)

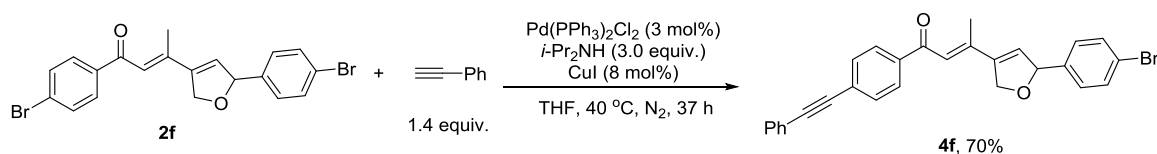

Following **Typical Procedure IV**, The reaction of Pd(PPh<sub>3</sub>)<sub>2</sub>Cl<sub>2</sub> (2.3 mg, 0.003 mmol), CuI (1.6 mg, 0.008 mmol), THF (0.8 mL), *i*-Pr<sub>2</sub>NH (43  $\mu$ L, *d* = 0.717 g/mL, 30.8 mg, 0.3 mmol), **2f** (45.0 mg, 0.1 mmol), and phenylacetylene (15  $\mu$ L, *d* = 0.93 g/mL, 14.0 mg, 0.14 mmol) afforded **4f** (32.9 mg, 70%) (eluent: petroleum ether/acetone = 20/1, 500 mL): solid; m.p. 141.9-143.8 °C (petroleum ether/DCM); <sup>1</sup>H NMR (300 MHz, CDCl<sub>3</sub>)  $\delta$  7.90 (d, *J* = 8.4 Hz, 2 H, ArH), 7.62 (d, *J* = 8.7 Hz, 2 H, ArH), 7.59-7.52 (m, 2 H, ArH), 7.50 (d, *J* = 8.4 Hz, 2 H, ArH), 7.42-7.30 (m, 3 H, ArH), 7.21 (d, *J* = 8.4 Hz, 2 H, ArH), 6.55 (s, 1 H, =CH), 6.30 (q, *J* = 1.5 Hz, 1 H, =CH), 5.99-5.82 (m, 1 H, OCH), 5.15 (ddd, *J*<sub>1</sub> = 11.4 Hz, *J*<sub>2</sub> = 5.4 Hz, *J*<sub>3</sub> = 1.8 Hz, 1 H, one proton of OCH<sub>2</sub>), 5.03 (ddd, *J*<sub>1</sub> = 11.4 Hz, *J*<sub>2</sub> = 3.6 Hz, *J*<sub>3</sub> = 1.8 Hz, 1 H, one proton of OCH<sub>2</sub>), 2.36 (s, 3 H, Me); <sup>13</sup>C NMR (75 MHz, CDCl<sub>3</sub>)  $\delta$  190.9, 145.0, 141.8, 140.1, 138.0, 132.4, 131.8, 131.7, 128.8, 128.4, 128.2, 128.1, 128.0, 122.7, 122.2, 122.0, 92.8, 88.7, 88.4, 75.0, 16.7; IR (neat)  $\nu$  (cm<sup>-1</sup>) 2923, 2857, 1652, 1603, 1239, 1216, 1089, 1049, 1010; MS (EI): *m/z* (%) 470 [M(<sup>81</sup>Br)<sup>+</sup>, 17.29], 468 [M(<sup>79</sup>Br)<sup>+</sup>, 13.82], 205 (100); Anal. Calcd. for C<sub>28</sub>H<sub>21</sub>BrO<sub>2</sub> (%): C, 71.65; H, 4.51; Found: C, 71.38; H, 4.55.

#### 5. Preparation of (*S,E*)-**5f**. (wxy-5-036)

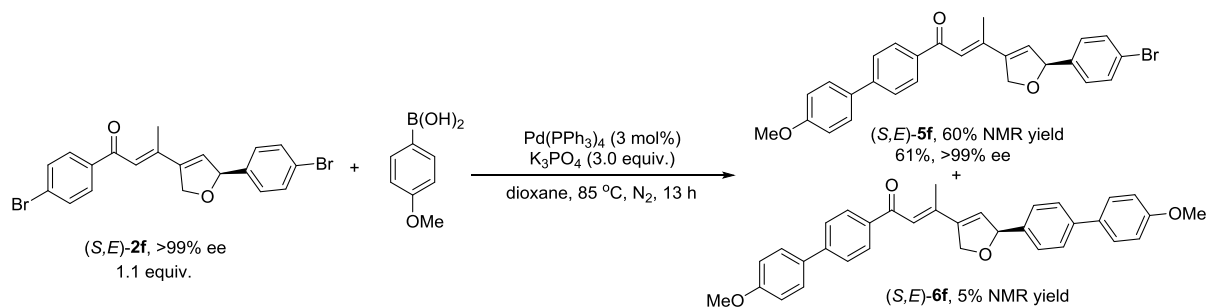

**Typical Procedure V:** To a Schlenk tube were added *(S,E)*-**2f** (98.5 mg, 0.22 mmol), (4-methoxyphenyl)boronic acid (30.5 mg, 0.2 mmol), Pd(PPh<sub>3</sub>)<sub>4</sub> (6.9 mg, 0.006 mmol), and K<sub>3</sub>PO<sub>4</sub> (126.8 mg, 0.6 mmol). After being evacuated and backfilled with nitrogen three times, dioxane (1.6 mL) was added. Then, the reaction tube was put into a pre-heated 85 °C oil bath. The reaction was complete after 13 h as monitored by TLC (eluent: petroleum ether/ethyl acetate = 9/1). The resulting mixture was filtered through a pad of celite and eluted with ethyl acetate (20 mL) and DCM (20 mL × 2). The combined filtrate was then concentrated in vacuo. The reaction afforded *(S,E)*-**5f** in 60% NMR yield together with 5% NMR of *(S,E)*-**6f**, which was analyzed by <sup>1</sup>H NMR using 7 μL of CH<sub>2</sub>Br<sub>2</sub> as the internal standard. The crude residue was then purified via chromatography on silica gel [eluent: petroleum ether/ ethyl acetate = 9/1 (500 mL) to petroleum ether/ ethyl acetate = 6/1 (350 mL)] to afford *(S,E)*-**5f** (57.8 mg, 61%): solid; m.p. 143.2-145.0 °C (petroleum ether/DCM); >99% ee (HPLC conditions: Chiralcel IA column, *n*-hexane/*i*-PrOH = 80/20, 1.3 mL/min, λ = 254 nm, t<sub>R</sub>(major) = 12.9 min, t<sub>R</sub>(minor) = 16.4 min); [α]<sub>D</sub><sup>20</sup> = -288.1 (c = 0.695, CHCl<sub>3</sub>); <sup>1</sup>H NMR (300 MHz, CDCl<sub>3</sub>) δ 7.97 (d, *J* = 8.7 Hz, 2 H, ArH), 7.66 (d, *J* = 8.1 Hz, 2 H, ArH), 7.59 (d, *J* = 8.7 Hz, 2 H, ArH), 7.50 (d, *J* = 8.4 Hz, 2 H, ArH), 7.23 (t, *J* = 8.0 Hz, 2 H, ArH), 7.01 (d, *J* = 8.7 Hz, 2 H, ArH), 6.60 (s, 1 H, =CH), 6.29 (d, *J* = 1.8 Hz, 1 H, =CH), 6.00-5.80 (m, 1 H, OCH), 5.17 (ddd, *J*<sub>1</sub> = 11.4 Hz, *J*<sub>2</sub> = 5.4 Hz, *J*<sub>3</sub> = 2.4 Hz, 1 H, one proton of OCH<sub>2</sub>), 5.04 (ddd, *J*<sub>1</sub> = 11.4

Hz,  $J_2 = 3.3$  Hz,  $J_3 = 1.8$  Hz, 1 H, one proton of OCH<sub>2</sub>), 3.87 (s, 3 H, OMe), 2.37 (s, 3 H, Me); <sup>13</sup>C NMR (75 MHz, CDCl<sub>3</sub>) δ 191.4, 160.0, 145.2, 144.3, 141.9, 140.2, 136.9, 132.3, 132.0, 131.8, 128.9, 128.4, 128.1, 126.7, 122.7, 122.0, 114.4, 88.4, 75.0, 55.4, 16.7; IR (neat) ν (cm<sup>-1</sup>) 3002, 2951, 2865, 2836, 1642, 1617, 1599, 1579, 1524, 1496, 1301, 1277, 1256, 1221, 1193, 1180, 1052, 1037, 1011, 1001; MS (EI): *m/z* (%) 476 [M(<sup>81</sup>Br)<sup>+</sup>, 16.52], 474 [M(<sup>79</sup>Br)<sup>+</sup>, 14.50], 211 (100); Anal. Calcd. for C<sub>27</sub>H<sub>23</sub>BrO<sub>3</sub> (%): C, 68.22; H, 4.88; Found: C, 68.40; H, 4.74.

#### 6. Preparation of (±)-**5f**. (wxy-5-007, wxy-5-029)

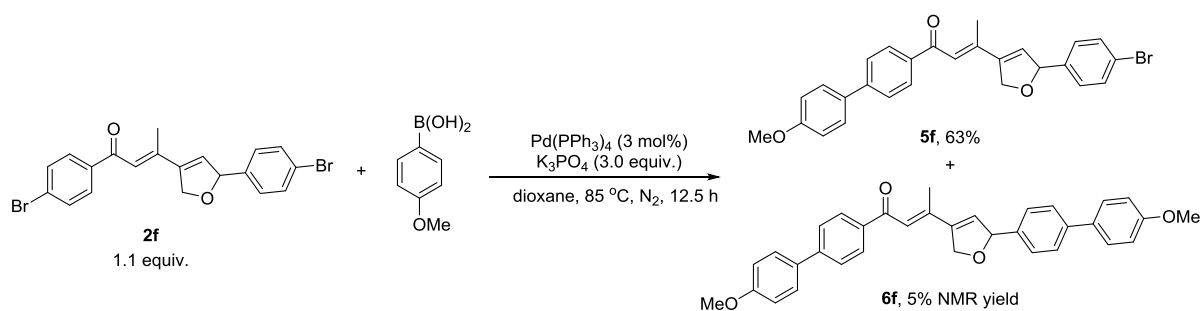

Following **Typical Procedure V**: The reaction of **2f** (49.4 mg, 0.11 mmol), (4-methoxyphenyl)boronic acid (15.2 mg, 0.1 mmol), Pd(PPh<sub>3</sub>)<sub>4</sub> (3.6 mg, 0.003 mmol), K<sub>3</sub>PO<sub>4</sub> (63.7 mg, 0.3 mmol), dioxane (0.8 mL) afforded (S,E)-**5f** in 60% NMR yield and (S,E)-**6f** in 5% NMR yield. The crude residue was then purified via chromatography on silica gel (eluent: petroleum ether/ ethyl acetate = 10/1, 1000 mL) to afford **5f** (29.9 mg, 63%): solid; m.p. 171.7-172.7 °C (petroleum ether/DCM); <sup>1</sup>H NMR (300 MHz, CDCl<sub>3</sub>) δ 7.97 (d,  $J = 8.7$  Hz, 2 H, ArH), 7.66 (d,  $J = 8.1$  Hz, 2 H, ArH), 7.59 (d,  $J = 8.7$  Hz, 2 H, ArH), 7.50 (d,  $J = 8.4$  Hz, 2 H, ArH), 7.23 (t,  $J = 8.1$  Hz, 2 H, ArH), 7.01 (d,  $J = 9.0$  Hz, 2 H, ArH), 6.60 (s, 1 H, =CH), 6.28 (q,  $J = 1.5$  Hz, 1 H, =CH), 5.95-5.87 (m, 1 H, OCH), 5.17 (ddd,  $J_1 = 11.4$  Hz,



$J_2 = 5.4$  Hz,  $J_3 = 2.4$  Hz, 1 H, one proton of OCH<sub>2</sub>), 5.04 (ddd,  $J_1 = 11.4$  Hz,  $J_2 = 3.3$  Hz,  $J_3 = 1.8$  Hz, 1 H, one proton of OCH<sub>2</sub>), 3.87 (s, 3 H, OMe), 2.37 (s, 3 H, Me); <sup>13</sup>C NMR (75 MHz, CDCl<sub>3</sub>)  $\delta$  191.4, 160.0, 145.2, 144.3, 141.9, 140.2, 136.9, 132.3, 132.0, 131.8, 128.9, 128.4, 128.1, 126.7, 122.7, 122.0, 114.4, 88.4, 75.0, 55.4, 16.7; IR (neat)  $\nu$  (cm<sup>-1</sup>) 3002, 2955, 2856, 2836, 1642, 1616, 1599, 1577, 1525, 1496, 1301, 1277, 1256, 1221, 1193, 1181, 1052, 1037, 1011, 1001; MS (EI):  $m/z$  (%) 476 [M(<sup>81</sup>Br)<sup>+</sup>, 22.56], 474 [M(<sup>79</sup>Br)<sup>+</sup>, 21.12], 263 (100); Anal. Calcd. for C<sub>27</sub>H<sub>23</sub>BrO<sub>3</sub> (%): C, 68.22; H, 4.88; Found: C, 68.58; H, 4.88.

#### 7. Preparation of (*S,E*)-**6f**. (wxy-5-031)

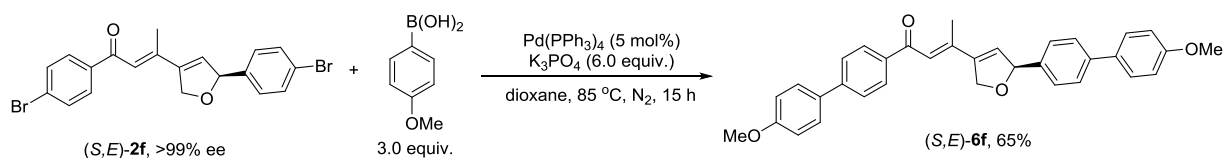

Following **Typical Procedure V**: The reaction of (*S,E*)-**2f** (89.9 mg, 0.2 mmol), (4-methoxyphenyl)boronic acid (90.8 mg, 0.6 mmol), Pd(PPh<sub>3</sub>)<sub>4</sub> (11.5 mg, 0.01 mmol), K<sub>3</sub>PO<sub>4</sub> (253.9 mg, 1.2 mmol), dioxane (2.4 mL) afforded (*S,E*)-**6f** (65.1 mg, 65%) [eluent: petroleum ether/ acetone = 9/1 (500 mL) to petroleum ether/ acetone = 4/1 (500 mL) to DCM (300 mL)]: solid; 185 °C (decompose); The ee of (*S,E*)-**6f** could not be determined by the HPLC conditions with the commercially available chiral columns.  $[\alpha]_D^{20} = -387.5$  (c = 0.32, CHCl<sub>3</sub>); <sup>1</sup>H NMR (300 MHz, CDCl<sub>3</sub>)  $\delta$  7.98 (d,  $J = 8.7$  Hz, 2 H, ArH), 7.66 (d,  $J = 8.4$  Hz, 2 H, ArH), 7.61-7.42 (m, 6 H, ArH), 7.39 (d,  $J = 8.1$  Hz, 2 H, ArH), 6.99 (t,  $J = 8.9$  Hz, 4 H, ArH), 6.62 (s, 1 H, =CH), 6.37 (q,  $J = 1.5$  Hz, 1 H, =CH), 6.05-5.94 (m, 1 H, OCH), 5.17 (m, 1 H, one proton of OCH<sub>2</sub>), 5.06 (m, 1 H, one proton of OCH<sub>2</sub>), 3.86 (s, 3 H, OMe), 3.85 (s, 3 H, Me), 2.39 (s, 3 H, Me); <sup>13</sup>C NMR (75 MHz, CDCl<sub>3</sub>)  $\delta$  191.4, 160.0, 159.3, 145.1, 144.7,

141.7, 140.8, 139.5, 137.1, 133.3, 132.6, 132.3, 128.9, 128.4, 128.1, 127.0, 126.9, 126.7, 122.4, 114.4, 114.2, 88.9, 74.9, 55.4, 55.3, 16.7; IR (neat)  $\nu$  (cm<sup>-1</sup>) 2955, 2834, 1651, 1601, 1525, 1497, 1294, 1274, 1250, 1190, 1038; MS (EI):  $m/z$  (%) 502 (M<sup>+</sup>, 37.65), 211 (100); HRMS Calcd. for C<sub>34</sub>H<sub>30</sub>O<sub>4</sub> (M<sup>+</sup>): 502.2144; Found: 502.2143.

### 8. Preparation of (±)-**6f**. (wxy-5-024)

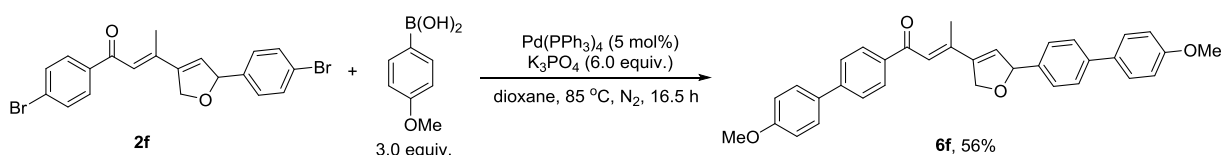

Following **Typical Procedure V**: The reaction of **2f** (179.5 mg, 0.4 mmol), (4-methoxyphenyl)boronic acid (182.1 mg, 1.2 mmol), Pd(PPh<sub>3</sub>)<sub>4</sub> (23.1 mg, 0.02 mmol), K<sub>3</sub>PO<sub>4</sub> (509.0 mg, 2.4 mmol), and dioxane (4.8 mL) afforded **6f** (120.1 mg, 56%, 93% purity) [eluent: petroleum ether/acetone = 9/1 (500 mL) to petroleum ether/acetone = 4/1 (500 mL) to DCM (200 mL)]: solid; 190 °C (decompose); <sup>1</sup>H NMR (300 MHz, CDCl<sub>3</sub>)  $\delta$  7.98 (d,  $J$  = 8.1 Hz, 2 H, ArH), 7.66 (d,  $J$  = 8.1 Hz, 2 H, ArH), 7.61-7.47 (m, 6 H, ArH), 7.39 (d,  $J$  = 8.1 Hz, 2 H, ArH), 6.99 (t,  $J$  = 8.9 Hz, 4 H, ArH), 6.62 (s, 1 H, =CH), 6.37 (q,  $J$  = 1.2 Hz, 1 H, =CH), 6.04-5.95 (m, 1 H, OCH), 5.26-5.15 (m, 1 H, one proton of OCH<sub>2</sub>), 5.12-5.00 (m, 1 H, one proton of OCH<sub>2</sub>), 3.87 (s, 3 H, OMe), 3.85 (s, 3 H, Me), 2.40 (s, 3 H, Me); <sup>13</sup>C NMR (75 MHz, CDCl<sub>3</sub>)  $\delta$  191.5, 160.0, 159.3, 145.1, 144.7, 141.7, 140.8, 139.5, 137.1, 133.3, 132.6, 132.3, 128.9, 128.4, 128.1, 127.0, 126.9, 126.7, 122.4, 114.4, 114.3, 88.9, 74.9, 55.4, 55.3, 16.7; IR (neat)  $\nu$  (cm<sup>-1</sup>) 2958, 2929, 2837, 1651, 1600, 1525, 1497, 1465, 1441, 1294, 1274, 1249, 1221, 1190, 1038; MS (EI):  $m/z$  (%) 502 (M<sup>+</sup>, 35.03), 211 (100); HRMS Calcd. for C<sub>34</sub>H<sub>30</sub>O<sub>4</sub> (M<sup>+</sup>): 502.2144; Found: 502.2146.

## Mechanistic Studies

### 1. Synthesis of 3-heptyl-2,5-dihydrofuran **7w**. (wxy-1-146)

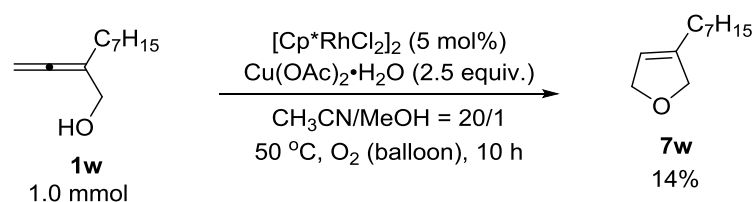

Following **Typical Procedure II**, the reaction of **1w**<sup>8</sup> (168.3 mg, 1.0 mmol),  $[\text{Cp}^*\text{RhCl}_2]_2$  (30.9 mg, 0.05 mmol), and  $\text{Cu}(\text{OAc})_2 \cdot \text{H}_2\text{O}$  (500.3 mg, 2.5 mmol) in  $\text{CH}_3\text{CN}$  (1.0 mL)/ $\text{MeOH}$  (50  $\mu\text{L}$ ) afforded **7w** (23.1 mg, 14%, 98% purity) (eluent: petroleum ether/ethyl acetate = 50/1, 600 mL): liquid;  $^1\text{H}$  NMR (300 MHz,  $\text{CDCl}_3$ )  $\delta$  5.48-5.43 (m, 1 H =CH), 4.66-4.58 (m, 2 H,  $\text{OCH}_2$ ), 4.56-4.48 (m, 2 H,  $\text{OCH}_2$ ), 2.08 (t,  $J = 7.1$  Hz, 2 H,  $\text{CH}_2$ ), 1.55-1.39 (m, 2 H,  $\text{CH}_2$ ), 1.35-1.20 (m, 8 H,  $\text{CH}_2 \times 4$ ), 0.89 (t,  $J = 6.8$  Hz, 3 H,  $\text{CH}_3$ );  $^{13}\text{C}$  NMR (75 MHz,  $\text{CDCl}_3$ )  $\delta$  140.7, 118.6, 77.03, 75.9, 31.7, 29.4, 29.1, 27.6, 27.1, 22.6, 14.0; IR (neat)  $\nu$  ( $\text{cm}^{-1}$ ) 2956, 2927, 2855, 1662, 1467, 1378, 1163, 1073; MS (EI):  $m/z$  (%) 168 ( $\text{M}^+$ , 5.57), 69 (100); HRMS Calcd. for  $\text{C}_{11}\text{H}_{20}\text{O}$  ( $\text{M}^+$ ): 168.1514; Found: 168.1512.

### 2. The reaction of **1e** with **8e** without $\text{Cu}(\text{OAc})_2 \cdot \text{H}_2\text{O}$ and $\text{O}_2$ . (wxy-3-027)

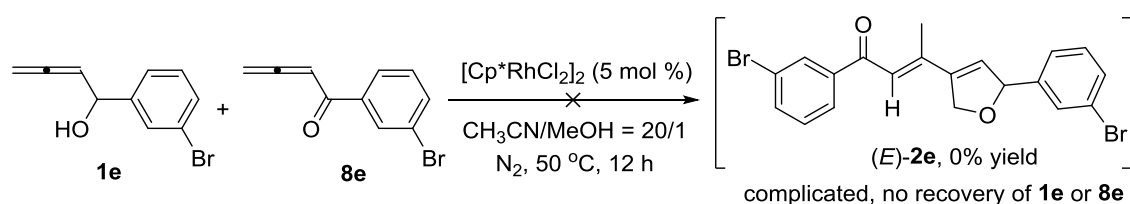

To a dried Schlenk tube were added  $[\text{Cp}^*\text{RhCl}_2]_2$  (5.1 mg, 0.008 mmol), **8e** (111.8 mg, 0.5 mmol), and allenol **1e** (112.8 mg, 0.5 mmol) under  $\text{N}_2$  atmosphere subsequently. After being stirred for 12 h at  $50\text{ }^\circ\text{C}$ , the resulting mixture was filtrated through a short column of silica gel (eluent with ethyl acetate 20 mL  $\times$  3). After evaporation of the solvent, the crude product

was analyzed by  $^1\text{H}$  NMR spectrum with mesitylene as an internal standard. No signal of the corresponding products was found.

### 3. Preparation of **9a**. (wxy-3-158)

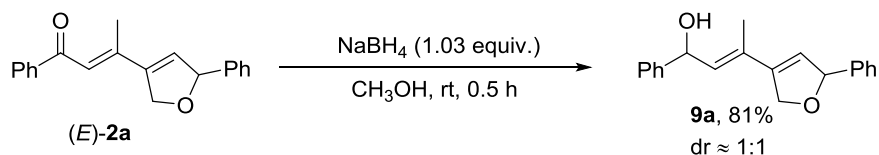

To a Schlenk tube were added (*E*)-**2a** (58.0 mg, 0.2 mmol), MeOH (3.0 mL), NaBH<sub>4</sub> (7.8 mg, 0.206 mmol) sequentially. The reaction was complete after 0.5 h as monitored by TLC (eluent: petroleum ether/ethyl acetate = 5/1). The resulting mixture was added an aqueous of saturated NH<sub>4</sub>Cl and extracted with ethyl acetate (5 mL  $\times$  3). After evaporation, 15  $\mu\text{L}$  mesitylene was added. 86% NMR yield of **9a** ( $\text{dr} \approx 1:1$ ) was determined based on  $^1\text{H}$  NMR analysis of the crude product with mesitylene as the internal standard. Then, the residue was purified via chromatography on silica gel [eluent: petroleum ether/ethyl acetate = 10/1 (1000 mL) to petroleum ether/ethyl acetate = 6/1 (420 mL)] afforded the diastereoisomers **9a**.

The less polar compound (24.5 mg, 92% purity, 39% yield): oil;  $^1\text{H}$  NMR (300 MHz, CDCl<sub>3</sub>)  $\delta$  7.42-7.22 (m, 10 H, ArH), 5.88-5.78 (m, 2 H, CH and =CH), 5.57 (d,  $J = 8.4$  Hz, 1 H, =CH), 5.47 (d,  $J = 8.4$  Hz, 1 H, OCH), 5.02 (ddd,  $J_1 = 11.4$  Hz,  $J_2 = 5.4$  Hz,  $J_3 = 1.8$  Hz, 1 H, one proton of OCH<sub>2</sub>), 4.82 (ddd,  $J_1 = 11.4$  Hz,  $J_2 = 3.2$  Hz,  $J_3 = 2.0$  Hz, 1 H, one proton of OCH<sub>2</sub>), 2.22 (s, 1 H, OH), 1.98 (d,  $J = 0.9$  Hz, 3 H, CH<sub>3</sub>);  $^{13}\text{C}$  NMR (75 MHz, CDCl<sub>3</sub>)  $\delta$  143.2, 141.9, 141.1, 131.5, 129.6, 128.7, 128.5, 127.9, 127.7, 126.4, 126.3, 125.9, 88.8, 75.2, 70.6, 14.8; IR (neat)  $\nu$  (cm<sup>-1</sup>) 3396, 3029, 2853, 1615, 1601, 1492, 1454, 1071, 1051, 1008; MS (EI):  $m/z$  (%) 292.4 (M<sup>+</sup>, 2.98), 105 (100); HRMS Calcd for C<sub>20</sub>H<sub>20</sub>NaO<sub>2</sub> (M+Na)<sup>+</sup>: 315.1361; Found: 315.1357.

The more polar compound (25.7 mg, 95% purity, 42% yield): oil;  $^1\text{H}$  NMR (300 MHz,  $\text{CDCl}_3$ )  $\delta$  7.45-7.20 (m, 10 H, ArH), 5.94-5.80 (m, 2 H, OCH and =CH), 5.58 (d,  $J$  = 8.4 Hz, 1 H, =CH), 5.48 (d,  $J$  = 8.4 Hz, 1 H, OCH), 4.97 (ddd,  $J_1$  = 11.4 Hz,  $J_2$  = 5.4 Hz,  $J_3$  = 2.1 Hz, 1 H, one proton of  $\text{OCH}_2$ ), 4.89 (ddd,  $J_1$  = 11.4 Hz,  $J_2$  = 3.5 Hz,  $J_3$  = 2.3 Hz, 1 H, one proton of  $\text{OCH}_2$ ), 2.20 (s, 1 H, OH), 1.98 (d,  $J$  = 0.6 Hz, 3 H,  $\text{CH}_3$ );  $^{13}\text{C}$  NMR (75 MHz,  $\text{CDCl}_3$ )  $\delta$  143.2, 141.9, 141.0, 131.5, 129.6, 128.7, 128.5, 127.8, 127.7, 126.3, 125.9, 88.7, 75.1, 70.6, 14.8; IR (neat)  $\nu$  ( $\text{cm}^{-1}$ ) 3406, 3029, 2852, 1611, 1599, 1492, 1454, 1265, 1195, 1071, 1051, 1010; MS (EI):  $m/z$  (%) 292.4 ( $\text{M}^+$ , 2.92), 105 (100); HRMS Calcd for  $\text{C}_{20}\text{H}_{20}\text{NaO}_2$  ( $\text{M}+\text{Na}$ ) $^+$ : 315.1361; Found: 315.1356.

4. The reaction of **9a** under standard conditions. (wxy-3-168)

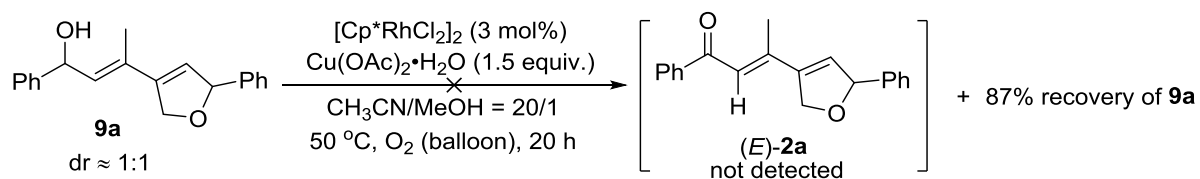

To a dried Schlenk tube were added  $[\text{Cp}^*\text{RhCl}_2]_2$  (3.2 mg, 0.005 mmol) and  $\text{Cu(OAc)}_2 \cdot \text{H}_2\text{O}$  (49.9 mg, 0.25 mmol) under air atmosphere. The Schlenk tube was then degassed to remove the air inside completely, and refilled with  $\text{O}_2$  by a balloon of  $\text{O}_2$  for three times. After **9a** (dr  $\approx$  1:1, 49.3 mg, 0.17 mmol)/ $\text{CH}_3\text{CN}$  (0.4 mL), and MeOH (20  $\mu\text{L}$ ) were added sequentially, the reaction tube was put into a pre-heated  $50\text{ }^\circ\text{C}$  oil bath. The reaction was stirred for 20 h. Then, the reaction was filtered through a short column of silica gel and eluted with ethyl acetate (20 mL  $\times$  3). The combined filtrate was then concentrated in vacuo and the crude residue was taken for NMR analysis with mesitylene (15.5  $\mu\text{L}$ ) as an internal standard. No signal of the (*E*)-**2a** was found, and 87% recovery of **9a** was determined.

5. Preparation of [D<sup>a</sup>]-**1a** (wxy-4-029).

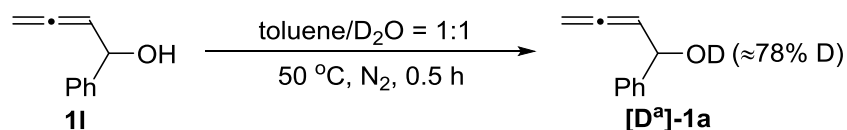

To a dried flask was added **1a** (220.3 mg, 1.5 mmol), freshly distilled toluene (0.5 mL), and D<sub>2</sub>O (0.5 mL) sequentially under nitrogen atmosphere. Then, the flask was put into an oil bath preheated to 50 °C. After being stirred for 30 min, the solvent was evaporated by vacuum carefully. Freshly distilled toluene (0.5 mL) and D<sub>2</sub>O (0.5 mL) was added to the flask for the second time, and the solvent was evaporated again. The same operation was repeated for three times. After being dried under vacuum line completely, 220.0 mg [D<sup>a</sup>]-**1a** was obtained with about 78% deuterated ratio: oil; <sup>1</sup>H NMR (300 MHz, CDCl<sub>3</sub>) δ 7.45-7.25 (m, 5 H, ArH), 5.44 (q, *J* = 6.6 Hz, 1 H, =CH), 5.32-5.22 (m, 1 H, OCH), 4.92 (m, 2 H, =CH<sub>2</sub>), the following signals is discernible for **1a**: δ 2.27 (s, 0.22 H, OH); <sup>13</sup>C NMR (75 MHz, CDCl<sub>3</sub>) δ 207.1, 142.7, 128.4, 127.7, 126.0, 95.0, 78.0, 71.8; IR (neat) *ν* (cm<sup>-1</sup>) 3364, 3063, 3030, 2886, 1955, 1494, 1452, 1024; MS (EI): *m/z* (%) 147 (M<sup>+</sup>, 1.65), 107 (100); HRMS Calcd. for C<sub>10</sub>H<sub>9</sub>DO (M<sup>+</sup>): 147.0794; Found: 147.0792.

6. Deuterium-labeling experiments with [D<sup>a</sup>]-**1a** (wxy-4-029).

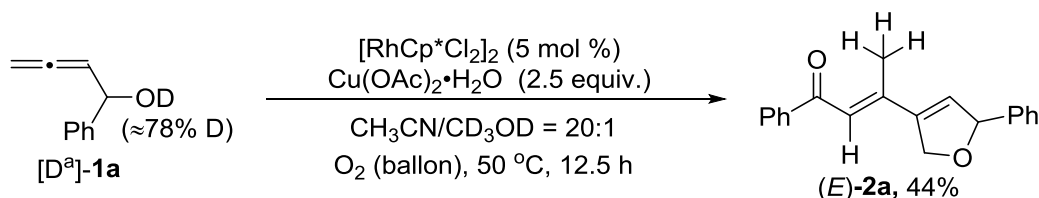

Following **Typical Procedure II**, the reaction of [D<sup>a</sup>]-**1a** (146.9 mg, 1.0 mmol), [Cp<sup>\*</sup>RhCl<sub>2</sub>]<sub>2</sub> (31.0 mg, 0.05 mmol), and Cu(OAc)<sub>2</sub>•H<sub>2</sub>O (499.9 mg, 2.5 mmol) in CH<sub>3</sub>CN (1.0 mL)/CD<sub>3</sub>OD (50 μL) afforded (*E*)-**2a** (63.9 mg, 44%) (eluent: petroleum ether/ethyl acetate 20/1, 700 mL): oil; <sup>1</sup>H NMR (300 MHz, CDCl<sub>3</sub>) δ 7.96-7.88 (m, 2 H, ArH), 7.60-7.52

(m, 1 H, ArH), 7.52-7.42 (m, 2 H, ArH), 7.42-7.26 (m, 5 H, ArH), 6.57 (s, 1 H, =CH), 6.34 (q,  $J = 1.8$  Hz, 1 H, =CH), 6.00-5.93 (m, 1 H, OCH), 5.17 (ddd,  $J_1 = 11.4$  Hz,  $J_2 = 5.3$  Hz,  $J_3 = 1.5$  Hz, 1 H, one proton of OCH<sub>2</sub>), 5.03 (ddd,  $J_1 = 11.4$  Hz,  $J_2 = 3.6$  Hz,  $J_3 = 2.1$  Hz, 1 H, one proton of OCH<sub>2</sub>), 2.37 (s, 3 H, Me); <sup>13</sup>C NMR (75 MHz, CDCl<sub>3</sub>) δ 191.9, 144.9, 141.4, 141.0, 138.8, 132.9, 132.7, 128.6, 128.5, 128.2, 128.1, 126.3, 122.2, 89.0, 74.9, 16.6.

## 7. Preparation of [D<sup>b</sup>]-**1m**. (wxy-4-020, wxy-4-021)

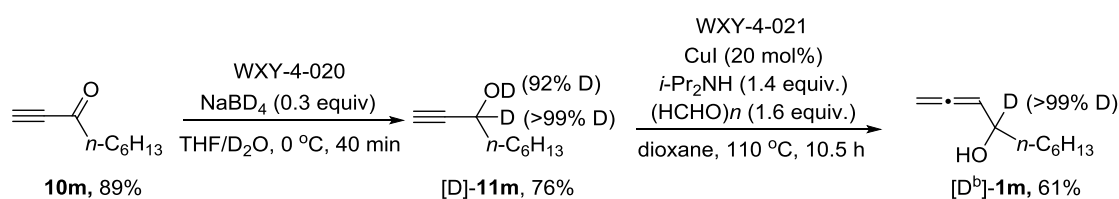

Preparation of [D]-**11m** (wxy-4-020): To a dried three-necked flask were added **10m**<sup>6a</sup> (3.3012 g, 23.9 mmol), freshly distilled THF (28 mL), and D<sub>2</sub>O (3 mL) under nitrogen atmosphere. Then, NaBD<sub>4</sub> (302.5 mg, 7.2 mmol) was added in small portions under 0 °C. After being stirred for 40 min at 0 °C, the reaction mixture was added 20 mL of saturated NH<sub>4</sub>Cl aqueous solution, extracted with Et<sub>2</sub>O (20 mL×3). Organic phase was combined and dried with Na<sub>2</sub>SO<sub>4</sub>. After filtration and concentration, the residue was purified via column chromatography on silica gel afforded [D]-**11m** (2.2596 g, 76%) [The crude product was purified via column chromatography on silica gel (eluent: petroleum ether/ethyl acetate = 20/1, 1000 mL) to afford a part of pure [D]-**11m** and impure [D]-**11m** (determined by TLC). The impure part was further purified via column chromatography on silica gel (eluent: petroleum ether/ethyl acetate = 20/1, 500 mL) to afford another part of pure [D]-**11m**]: oil; <sup>1</sup>H NMR (300 MHz, CDCl<sub>3</sub>) δ 2.49 (s, 1 H, ≡CH), 1.80-1.60 (m, 2 H, CH<sub>2</sub>), 1.55-1.20 (m, 8 H, CH<sub>2</sub> × 4), 0.89 (t,  $J = 6.6$  Hz, 3 H, CH<sub>3</sub>), the following signal is discernible for **11m**: δ 2.13 (s, 0.08 H, OH); <sup>13</sup>C NMR (75 MHz, CDCl<sub>3</sub>) δ 84.6 (t,  $J = 7.2$  Hz), 72.7 (t,  $J = 19.3$  Hz), 61.8

(t,  $J = 22.4$  Hz), 37.4, 31.6, 28.8, 24.9, 22.5, 14.0, the following signals are discernible for **11m**:  $\delta$  85.0, 71.9; IR (neat)  $\nu$  ( $\text{cm}^{-1}$ ) 3368, 2954, 2927, 2858, 2597, 1466, 1393, 1063; MS (EI):  $m/z$  (%) 142 ( $\text{M}^+$ , 0.03), 140 [ $(\text{M}-\text{D})^+$ , 0.14], 57 [ $(\text{M}-\text{C}_6\text{H}_{13})^+$ , 59.4], 43 (100); HRMS Calcd. for  $\text{C}_9\text{H}_{14}\text{D}_2\text{O}$  ( $\text{M}^+$ ): 142.1327; Found: 142.1330.

Preparation of  $[\text{D}^b]\text{-1m}$  (wxy-4-021): Following **Typical Procedure I**, The reaction of CuI (388.0 mg, 2.0 mmol),  $[\text{D}]\text{-11m}$  (1.4230 g, 10.0 mmol), paraformaldehyde (1.4420 g, 16.0 mmol), and  $i\text{-Pr}_2\text{NH}$  (2.0 mL,  $d = 0.716$  g/mL, 1.4320 g, 14.2 mmol) in dioxane (15 mL) afforded  $[\text{D}^b]\text{-1m}$  (0.9519 g, 61%, >99% D) (eluent: petroleum ether/ethyl acetate = 25/1, 1000 mL) as an oil:  $^1\text{H}$  NMR (300 MHz,  $\text{CDCl}_3$ )  $\delta$  5.24 (t,  $J = 6.6$  Hz, 1 H, =CH), 4.85 (d,  $J = 6.6$  Hz, 2 H, =CH<sub>2</sub>), 1.70 (s, 1 H, OH), 1.64-1.15 (m, 10 H, CH<sub>2</sub>  $\times$  5), 0.89 (t,  $J = 6.6$  Hz, 3 H, CH<sub>3</sub>);  $^{13}\text{C}$  NMR (75 MHz,  $\text{CDCl}_3$ )  $\delta$  207.0, 94.8, 77.3, 69.3 (t,  $J = 22.1$  Hz), 37.4, 31.8, 29.1, 25.3, 22.6, 14.0; IR (neat)  $\nu$  ( $\text{cm}^{-1}$ ) 3347, 2956, 2928, 2857, 1958, 1463, 1049; MS (EI):  $m/z$  (%) 116 [ $(\text{M}-\text{CH}_2=\text{C}=\text{CH})^+$ , 19.6], 70 (100); HRMS Calcd. for  $\text{C}_{10}\text{H}_{17}\text{DO}$  ( $\text{M}^+$ ): 155.1420; Found: 155.1418.

#### 8. Deuterium-labeling experiments with $[\text{D}^b]\text{-1m}$ (wxy-4-024).

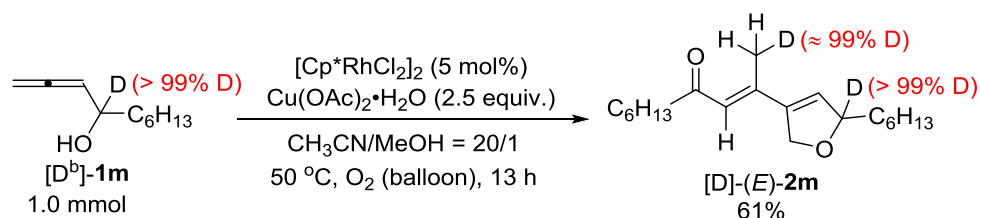

Following **Typical Procedure II**, the reaction of  $[\text{D}^b]\text{-1m}$  (155.2 mg, 1.0 mmol),  $[\text{Cp}^*\text{RhCl}_2]_2$  (30.9 mg, 0.05 mmol), and  $\text{Cu(OAc)}_2\cdot\text{H}_2\text{O}$  (499.9 mg, 2.5 mmol) in  $\text{CH}_3\text{CN}$  (1.0 mL)/MeOH (50  $\mu\text{L}$ ) afforded  $[\text{D}]\text{-(E)-2m}$  (93.3 mg, 61%) (eluent: petroleum ether/ethyl



acetate 25/1, 500 mL): oil;  $^1\text{H}$  NMR (300 MHz,  $\text{CDCl}_3$ )  $\delta$  6.23 (s, 1 H, =CH), 5.81 (s, 1 H, =CH), 4.78 (qd,  $J_1 = 11.4$  Hz,  $J_2 = 1.7$  Hz, 2 H,  $\text{OCH}_2$ ), 2.47 (t,  $J = 7.4$  Hz, 2 H,  $\text{CH}_2$ ), 2.29 (s, 2 H,  $\text{CH}_2\text{D}$ ), 1.66-1.50 (m, 4 H,  $\text{CH}_2 \times 2$ ), 1.45-1.20 (m, 14 H,  $\text{CH}_2 \times 7$ ), 0.88 (t,  $J = 6.9$  Hz, 6 H, Me  $\times 2$ );  $^{13}\text{C}$  NMR (75 MHz,  $\text{CDCl}_3$ )  $\delta$  201.7, 143.8, 141.3, 133.5, 123.5, 86.8 (t,  $J = 22.1$  Hz), 73.9, 44.7, 35.6, 31.7, 31.5, 29.3, 28.8, 25.2, 24.1, 22.5, 22.4, 15.8 (t,  $J = 19.7$  Hz), 14.0, 13.9; IR (neat)  $\nu$  ( $\text{cm}^{-1}$ ) 2955, 2928, 2856, 1682, 1615, 1586, 1466, 1133, 1076; MS (EI):  $m/z$  (%) 308.5 ( $\text{M}^+$ , 6.3), 223 (100); HRMS Calcd. for  $\text{C}_{20}\text{H}_{32}\text{D}_2\text{O}_2$  ( $\text{M}^+$ ): 308.2684; Found: 308.2686.

## References:

- (1) Xu, D.; Li, Z.; Ma, S. *Tetrahedron Lett.* **2003**, *44*, 6343.
- (2) Luo, H.; Ma, S. *Eur. J. Org. Chem.* **2013**, 3041.
- (3) Yoshida, M.; Shoji, Y.; Shishido, K. *Org. Lett.* **2009**, *11*, 1441.
- (4) Cheng, X.; Jiang, X.; Yu, Y.; Ma, S. *J. Org. Chem.* **2008**, *73*, 8960.
- (5) Yang, B.; Zhu, C.; Qiu, Y.; Bäckvall, J.-E. *Angew. Chem. Int. Ed.* **2016**, *55*, 5568
- (6) (a) Ma, S.; Liu, J.; Li, S.; Chen, B.; Cheng, J.; Kuang, J.; Liu, Y.; Wan, B.; Wang, Y.; Ye, J.; Yu, Q.; Yuan, W.; Yu, S. *Adv. Synth. Catal.* **2011**, *353*, 1005. (b) Hashmi, A. S. K.; Ruppert, T. L.; Knöfel, T.; Bats, J. W. *J. Org. Chem.* **1997**, *62*, 7295.
- (7) Payack, J. F.; Hughes, D. L.; Cai, D.; Cottrell, I. F.; Verhoeven, T. R. *Org. Synth.* **2002**, *79*, 19.
- (8) Li, J.; Kong, W.; Fu, C.; Ma, S. *J. Org. Chem.* **2009**, *74*, 5104.

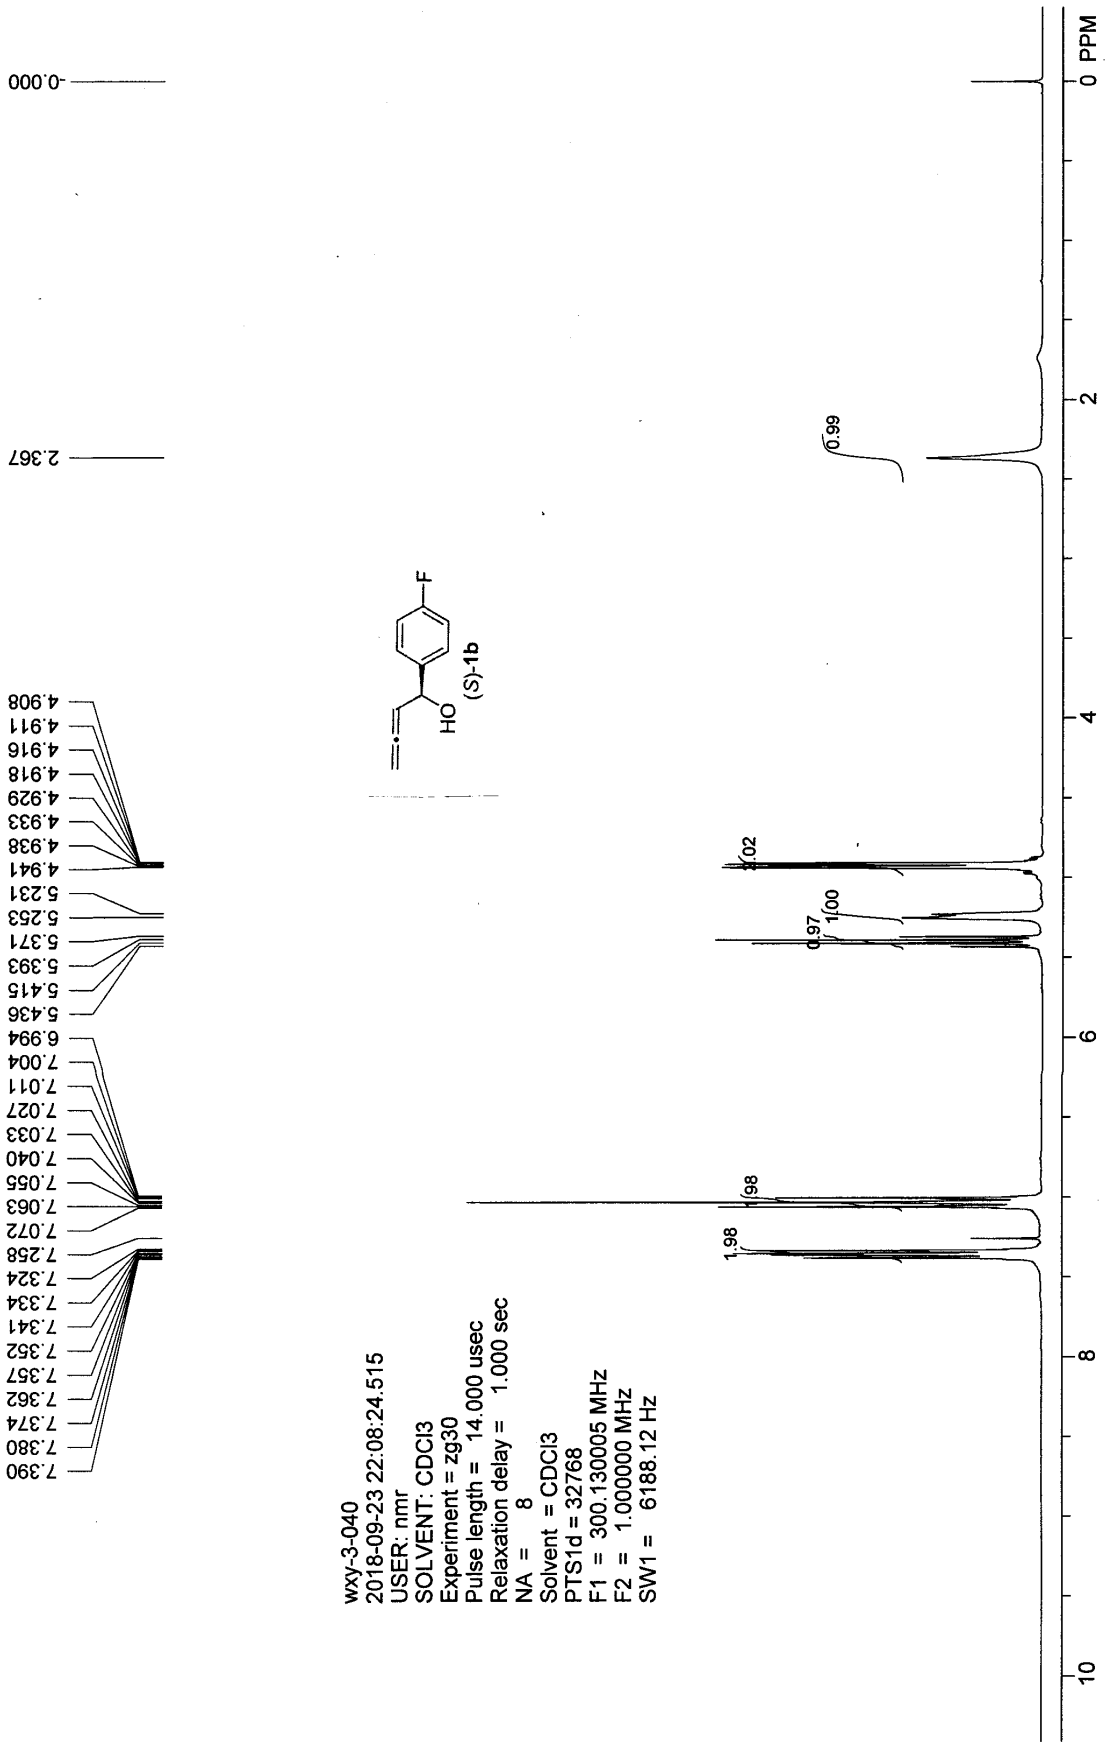

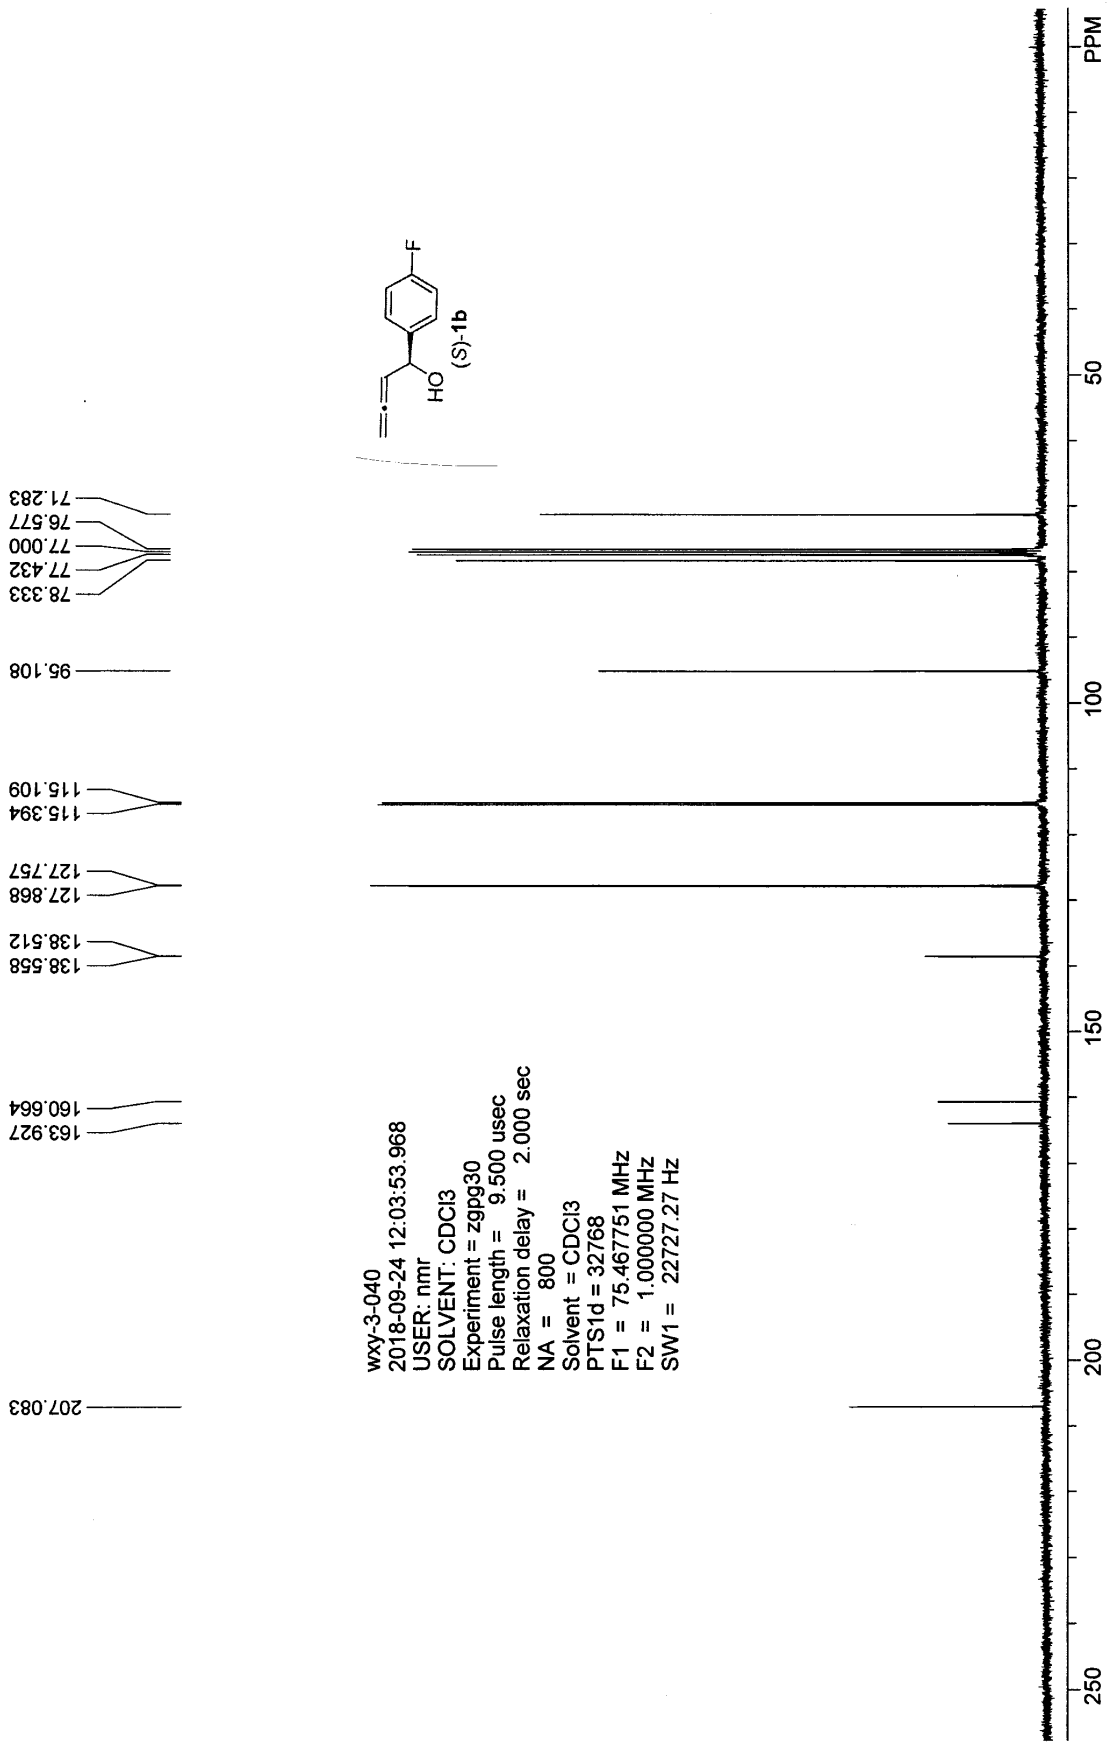

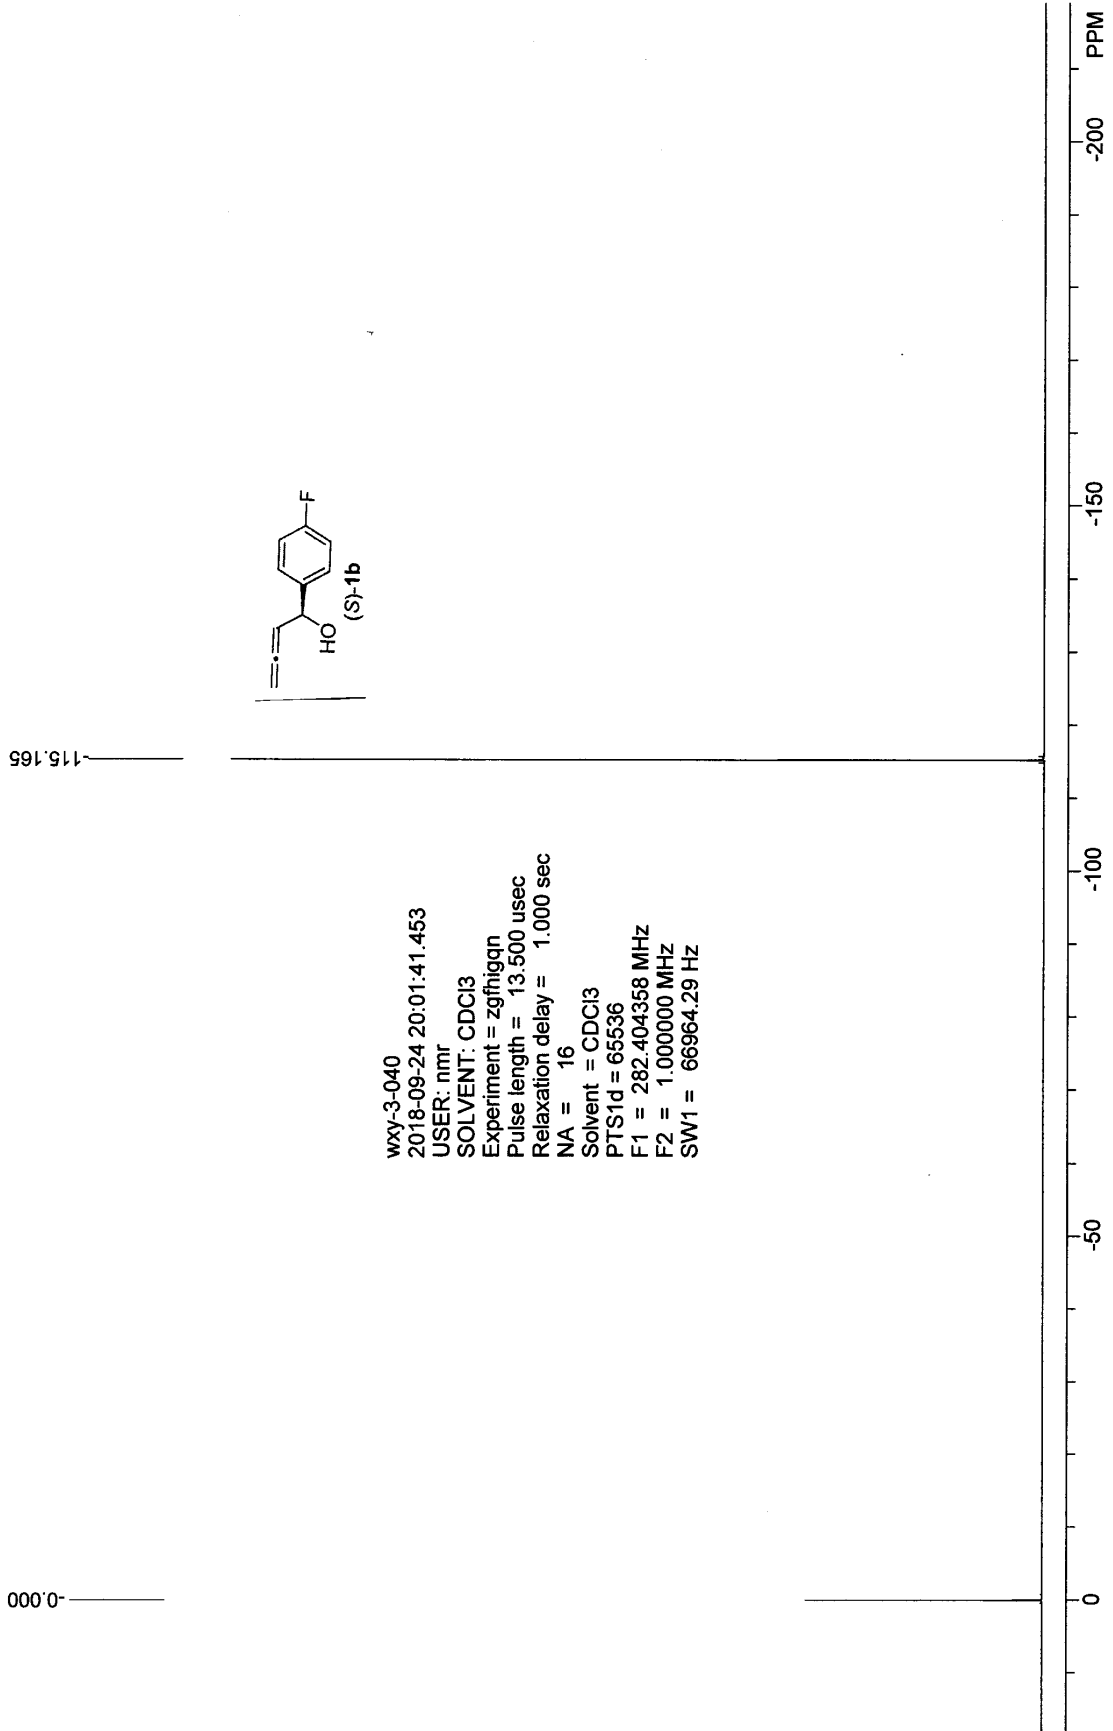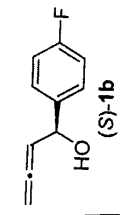

wxy-3-040  
2018-09-24 20:01:41.453  
USER: nmr  
SOLVENT: CDCl3  
Experiment = zgfhgqn  
Pulse length = 13.500 usec  
Relaxation delay = 1.000 sec  
NA = 16  
Solvent = CDCl3  
PTS1d = 65536  
F1 = 282.404358 MHz  
F2 = 1.000000 MHz  
SW1 = 66964.29 Hz

-0.000

-115.165

PPM

-200

-150

-100

-50

0

# wxy-3-040-chiral

实验时间: 2018-09-24, 10:57:57  
谱图文件: D:\浙大智达\N2000\样品\S20180924105757.org  
方法文件: D:\浙大智达\N2000\djx.mtd

实验者: wxy  
报告时间: 2018-09-24, 11:35:03  
积分方法: 面积归一法

实验内容简介:  
od-H, n-hexane/i-PrOH = 90/10, 0.5, 254

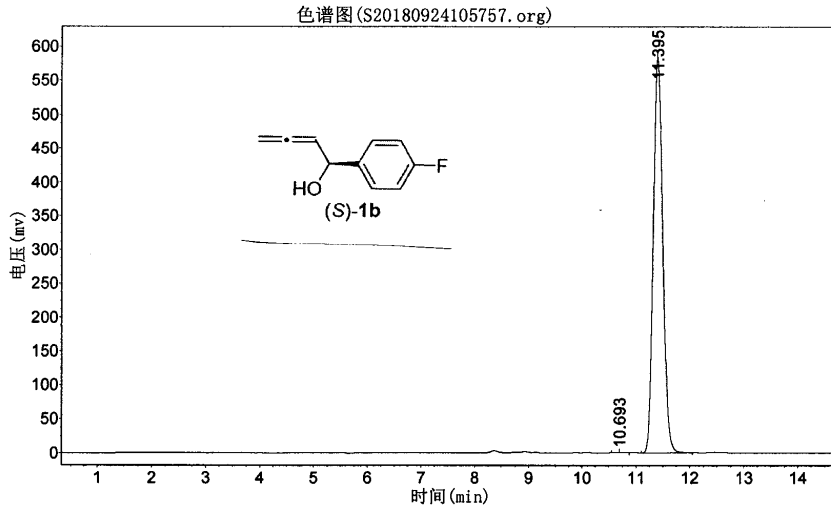

分析结果表

| 峰号 | 峰名 | 保留时间   | 峰高         | 峰面积         | 含量       |
|----|----|--------|------------|-------------|----------|
| 1  |    | 10.693 | 209.896    | 2801.800    | 0.0393   |
| 2  |    | 11.395 | 583800.063 | 7126410.500 | 99.9607  |
| 总计 |    |        | 584009.958 | 7129212.300 | 100.0000 |

# wxy-3-040-racemic

实验时间: 2018-09-24, 9:55:39  
谱图文件: D:\浙大智达\N2000\样品\S20180924095539.org  
方法文件: D:\浙大智达\N2000\djx.mtd

实验者: wxy  
报告时间: 2018-09-24, 11:31:01  
积分方法: 面积归一法

实验内容简介:  
od-H, n-hexane/i-PrOH = 90/10, 0.5, 254

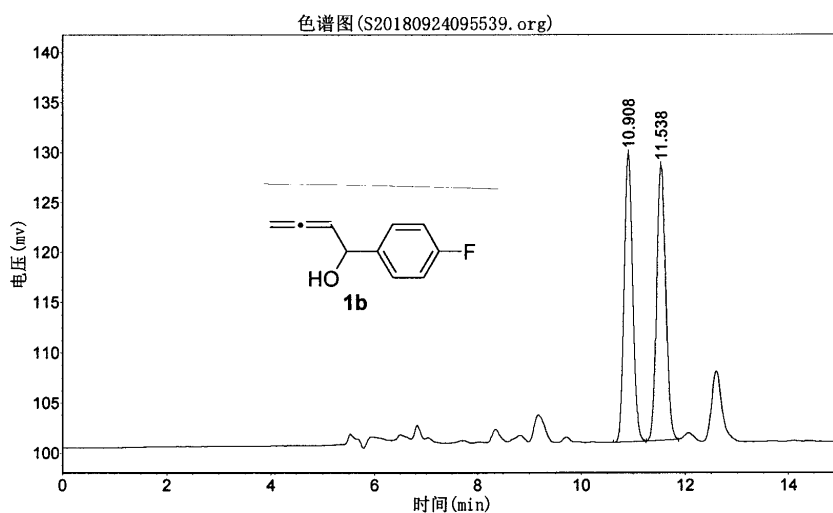

分析结果表

| 峰号 | 峰名 | 保留时间   | 峰高        | 峰面积        | 含量       |
|----|----|--------|-----------|------------|----------|
| 1  |    | 10.908 | 28748.135 | 326965.188 | 49.8117  |
| 2  |    | 11.538 | 27350.115 | 329437.344 | 50.1883  |
| 总计 |    |        | 56098.250 | 656402.531 | 100.0000 |

7.529  
 7.524  
 7.518  
 7.411  
 7.406  
 7.400  
 7.385  
 7.380  
 7.374  
 7.292  
 7.287  
 7.271  
 7.266  
 7.249  
 7.248  
 7.219  
 7.193  
 7.168  
 5.388  
 5.366  
 5.344  
 5.323  
 5.206  
 5.199  
 5.193  
 5.186  
 5.179  
 5.171  
 5.165  
 5.158  
 4.929  
 4.922  
 4.907  
 4.899  
 2.769  
 2.755

wxy-3-104  
 2018-11-20 19:14:15.234  
 USER: nmr  
 SOLVENT: CDCl3  
 Experiment = zg30  
 Pulse length = 14.000 usec  
 Relaxation delay = 1.000 sec  
 NA = 8  
 Solvent = CDCl3  
 P1 = 32768  
 F1 = 300.130005 MHz  
 F2 = 1.000000 MHz  
 SW1 = 6188.12 Hz

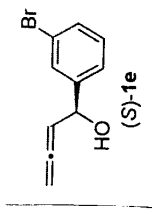

1.00  
 1.00  
 1.16  
 1.99

1.95/03  
 1.06

1.02

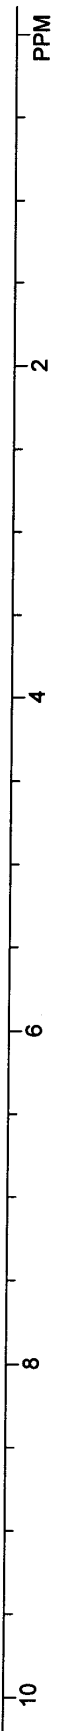



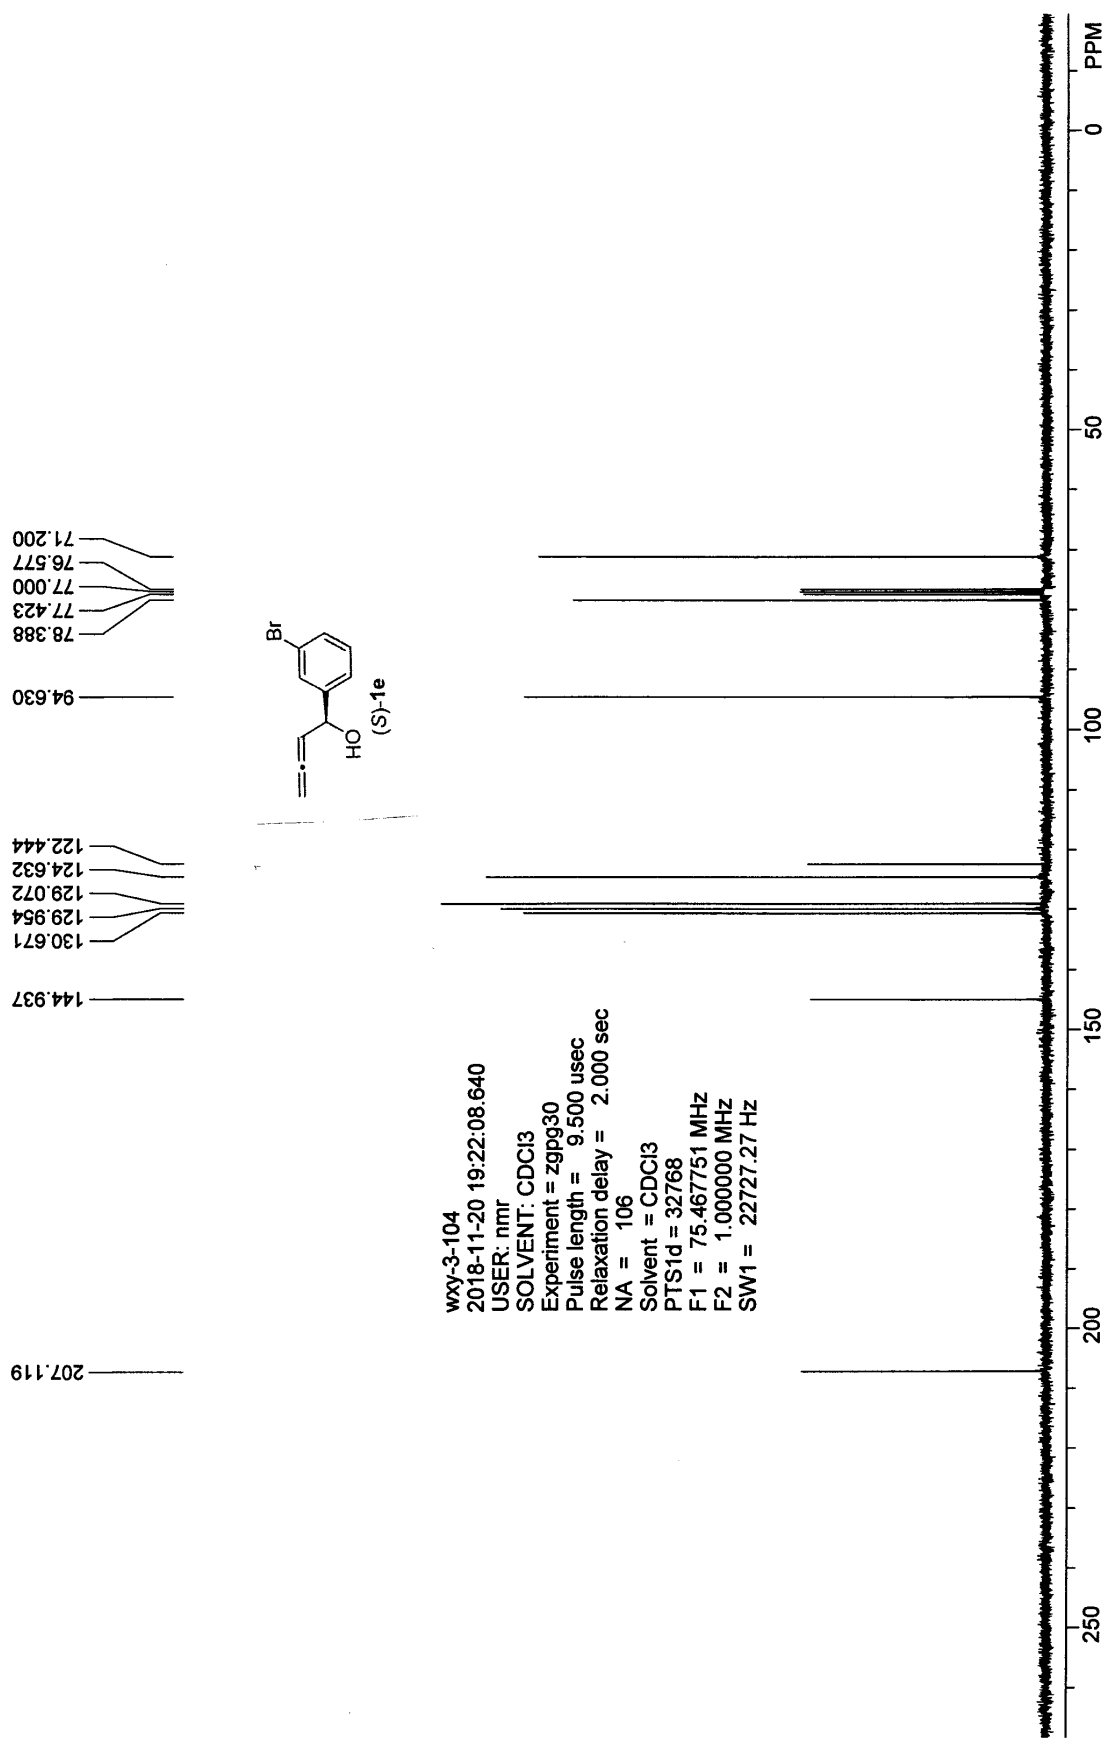

wxy-3-104  
 2018-11-20 19:22:08.640  
 USER: nmr  
 SOLVENT: CDCl3  
 Experiment = zgpg30  
 Pulse length = 9.500 usec  
 Relaxation delay = 2.000 sec  
 NA = 106  
 Solvent = CDCl3  
 PTS1d = 32768  
 F1 = 75.467751 MHz  
 F2 = 1.000000 MHz  
 SW1 = 22727.27 Hz

# wxy-3-104-Chiral

实验时间: 2018-11-21, 23:26:05  
谱图文件: D:\浙大智达\N2000\样品\S20181121232605.org  
方法文件: D:\浙大智达\N2000\djx.mtd

实验者: wxy  
报告时间: 2018-12-11, 12:46:20  
积分方法: 面积归一法

实验内容简介:  
OD-H, n-hexane/i-PrOH = 95/5, 1.0, 254

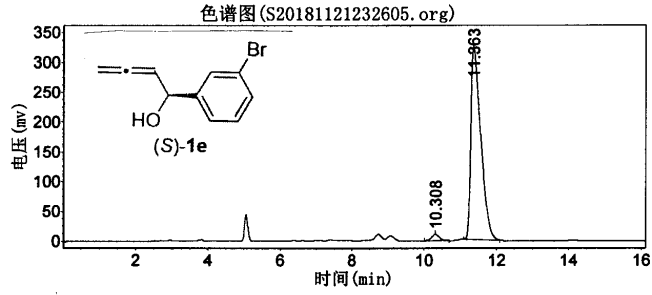

分析结果表

| 峰号 | 峰名 | 保留时间   | 峰高         | 峰面积         | 含量       |
|----|----|--------|------------|-------------|----------|
| 1  |    | 10.308 | 10769.917  | 147315.500  | 2.3293   |
| 2  |    | 11.363 | 321465.625 | 6177091.000 | 97.6707  |
| 总计 |    |        | 332235.542 | 6324406.500 | 100.0000 |

# wxy-3-104-racemic

实验时间: 2018-11-21, 22:32:08  
谱图文件: D:\浙大智达\N2000\样品\S20181121223208.org  
方法文件: D:\浙大智达\N2000\djx.mtd

实验者: wxy  
报告时间: 2018-11-21, 23:49:35  
积分方法: 面积归一法

实验内容简介:  
OD-H, n-hexane/i-PrOH = 95/5, 1.0, 254

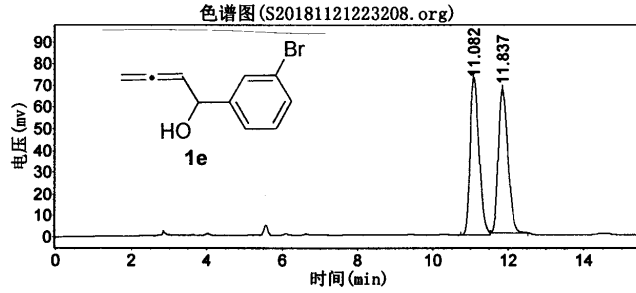

分析结果表

| 峰号 | 峰名 | 保留时间   | 峰高         | 峰面积         | 含量       |
|----|----|--------|------------|-------------|----------|
| 1  |    | 11.082 | 72686.227  | 1196967.875 | 50.4561  |
| 2  |    | 11.837 | 66179.430  | 1175327.625 | 49.5439  |
| 总计 |    |        | 138865.656 | 2372295.500 | 100.0000 |

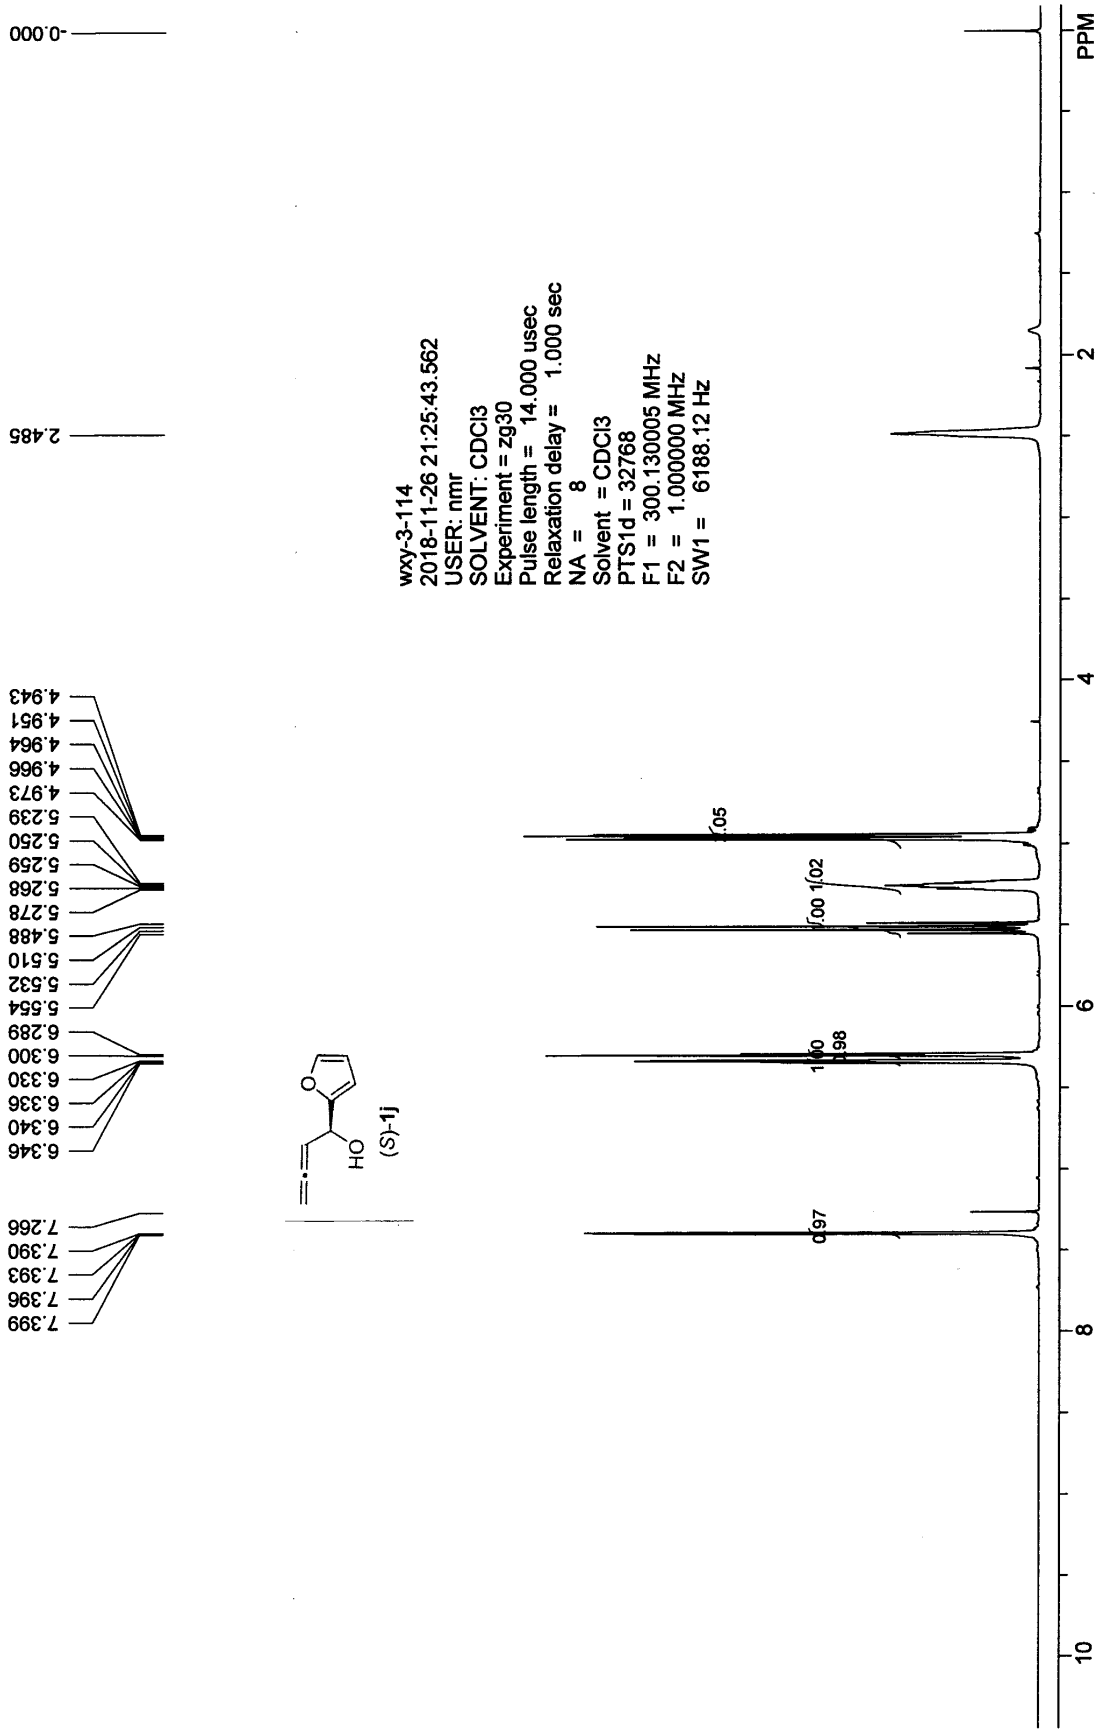

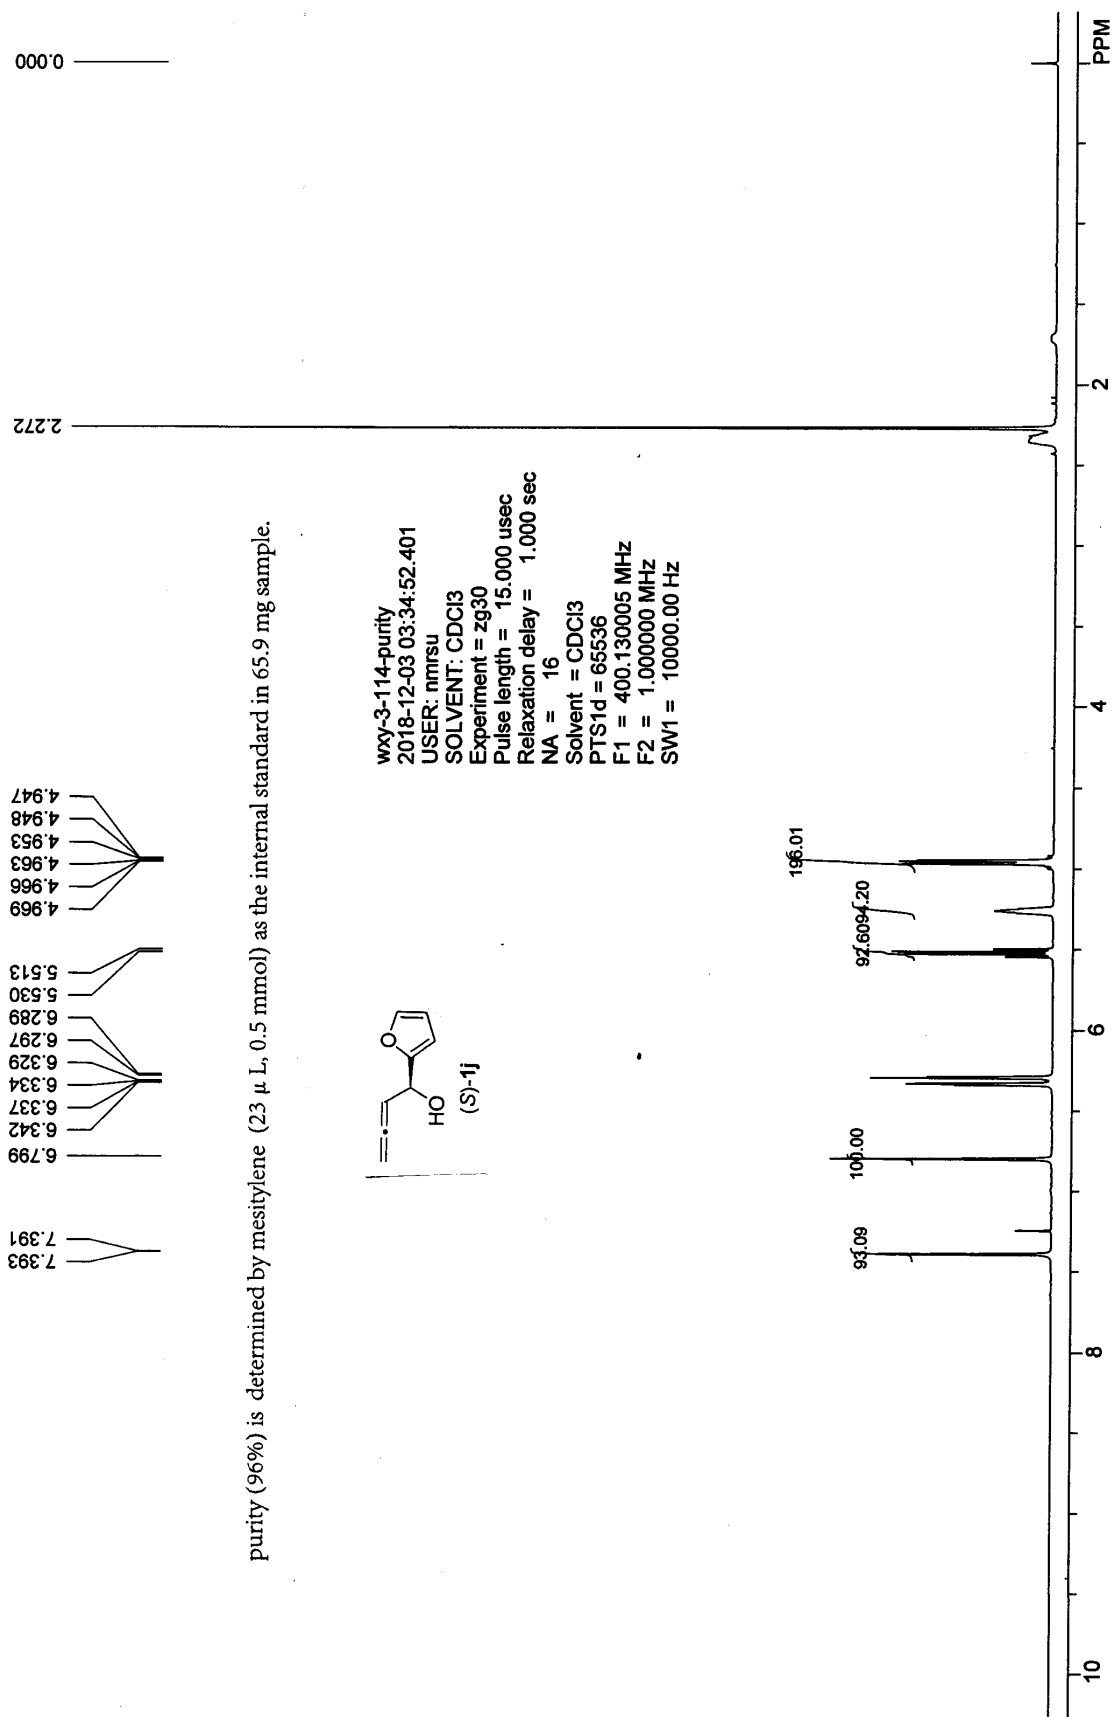

purity (96%) is determined by mesitylene (23  $\mu$ L, 0.5 mmol) as the internal standard in 65.9 mg sample.

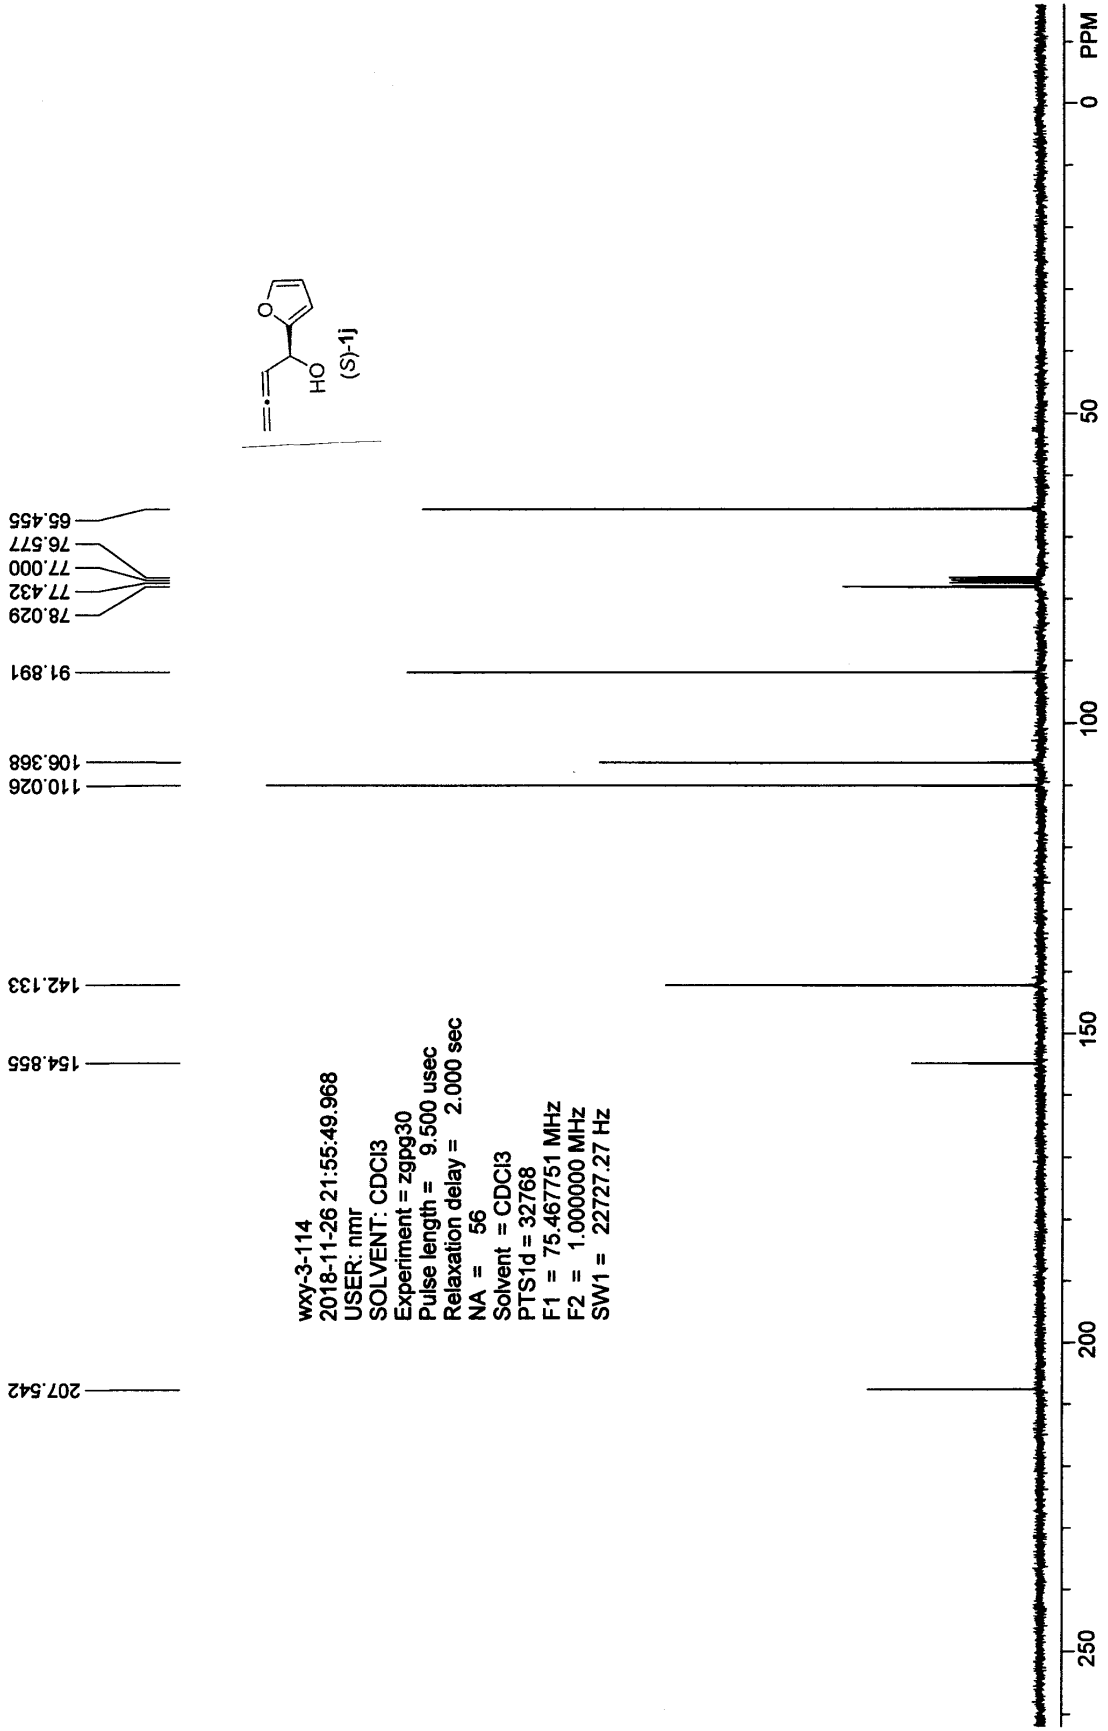

# wxy-3-114-Chiral

实验时间: 2018-11-28, 10:51:50  
 谱图文件: D:\浙大智达\N2000\样品\S20181128105150.org  
 方法文件: D:\浙大智达\N2000\djx.mtd

实验者: wxy  
 报告时间: 2018-11-28, 12:05:51  
 积分方法: 面积归一法

实验内容简介:  
 od-H, n-hexane/i-PrOH = 90/10, 1.0, 220

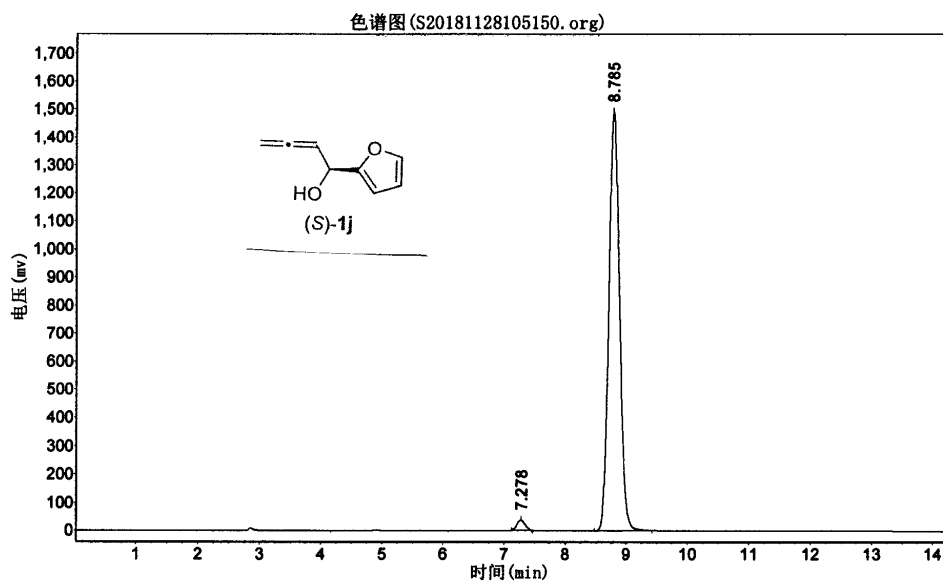

分析结果表

| 峰号 | 峰名 | 保留时间  | 峰高          | 峰面积          | 含量       |
|----|----|-------|-------------|--------------|----------|
| 1  |    | 7.278 | 35930.438   | 331924.594   | 1.7927   |
| 2  |    | 8.785 | 1491204.125 | 18183154.000 | 98.2073  |
| 总计 |    |       | 1527134.563 | 18515078.594 | 100.0000 |

# wxy-3-114-racemic

实验时间: 2018-11-28, 11:41:08  
 谱图文件: D:\浙大智达\N2000\样品\S20181128114108.org  
 方法文件: D:\浙大智达\N2000\djx.mtd

实验者: wxy  
 报告时间: 2018-11-28, 12:03:45  
 积分方法: 面积归一法

实验内容简介:  
 od-H, n-hexane/i-PrOH = 90/10, 1.0, 220

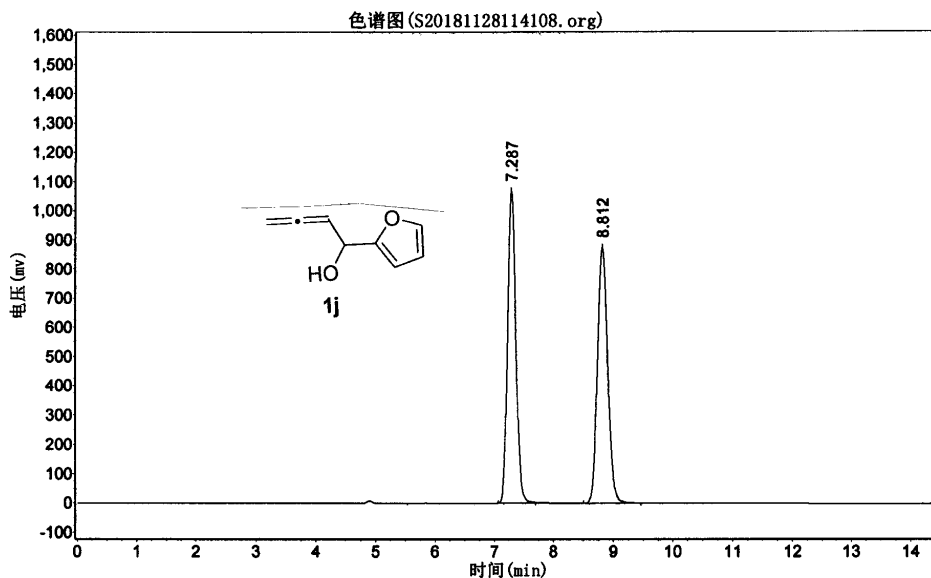

分析结果表

| 峰号 | 峰名 | 保留时间  | 峰高          | 峰面积          | 含量       |
|----|----|-------|-------------|--------------|----------|
| 1  |    | 7.287 | 1064891.875 | 10312150.000 | 49.7654  |
| 2  |    | 8.812 | 871514.125  | 10409357.000 | 50.2346  |
| 总计 |    |       | 1936406.000 | 20721507.000 | 100.0000 |



wxy-3-042  
 2018-09-21 22:07:12.234  
 USER: nmr  
 SOLVENT: CDCl3  
 Experiment = zg30  
 Pulse length = 14.000 usec  
 Relaxation delay = 1.000 sec  
 NA = 8  
 Solvent = CDCl3  
 PTS1d = 32768  
 F1 = 300.130005 MHz  
 F2 = 1.000000 MHz  
 SW1 = 6188.12 Hz

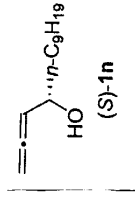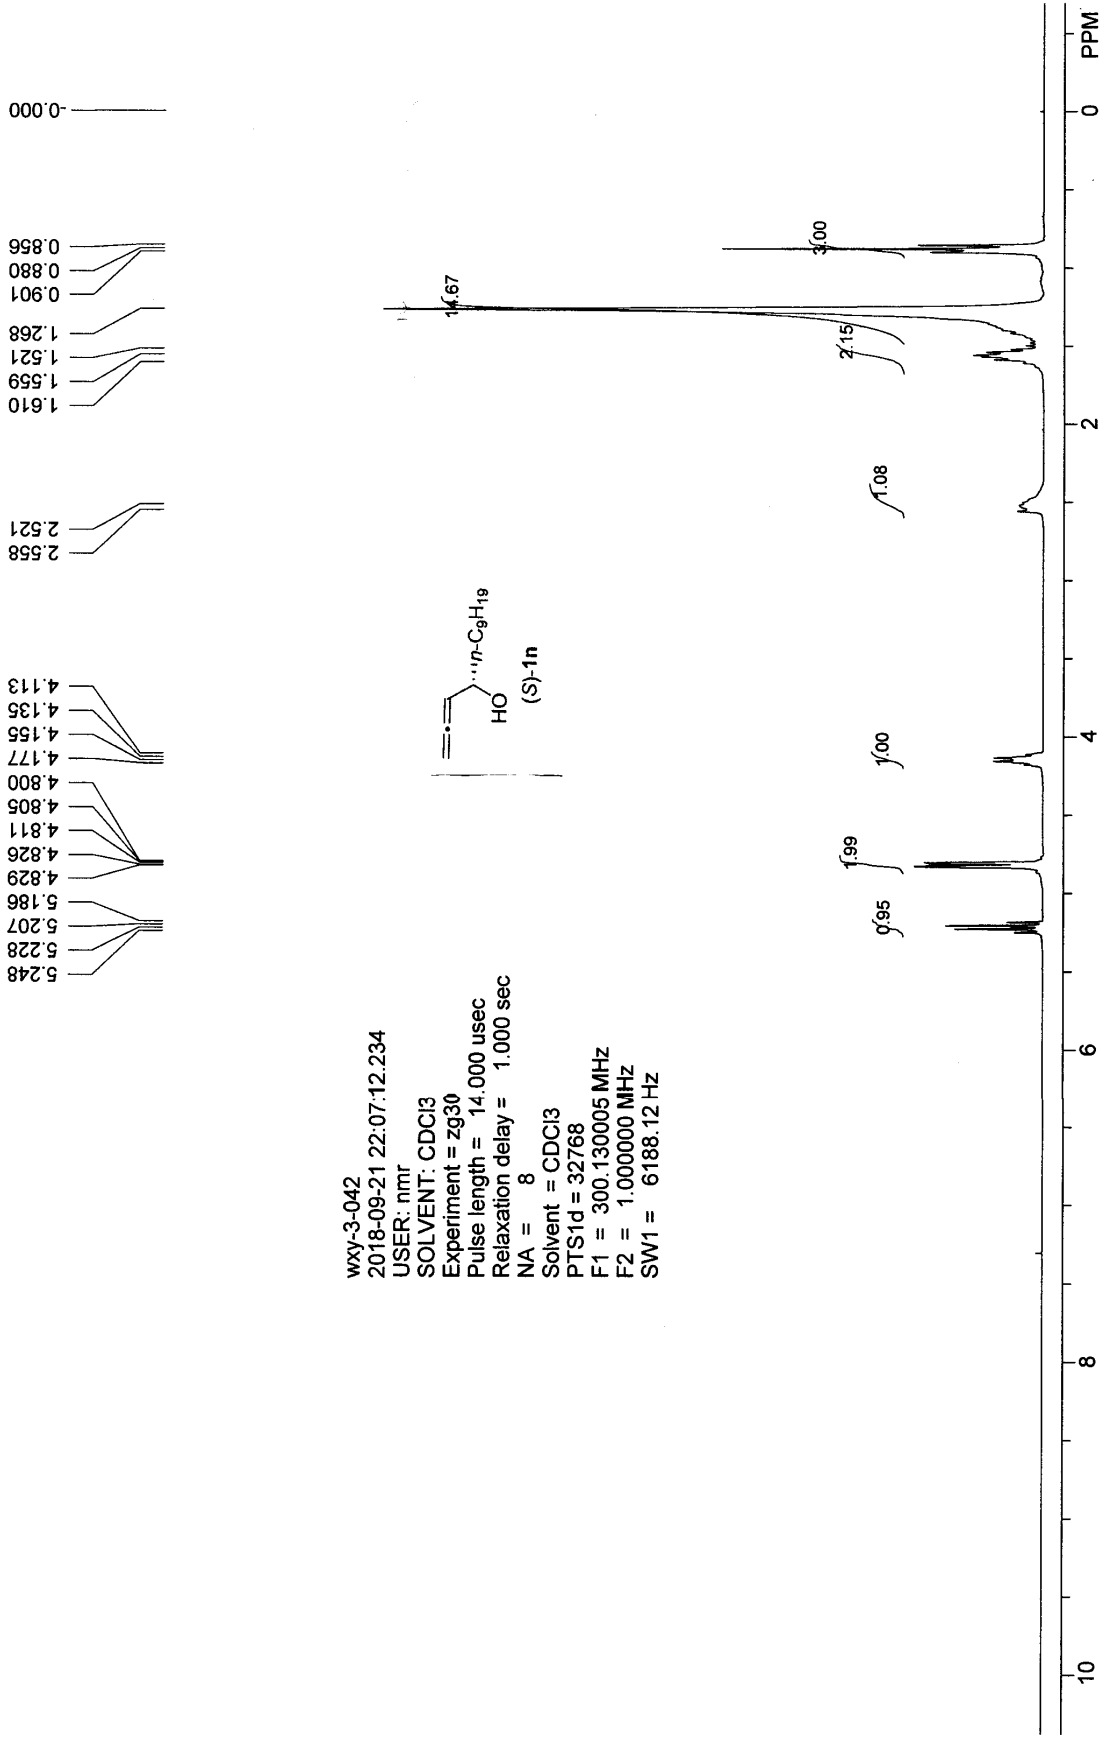

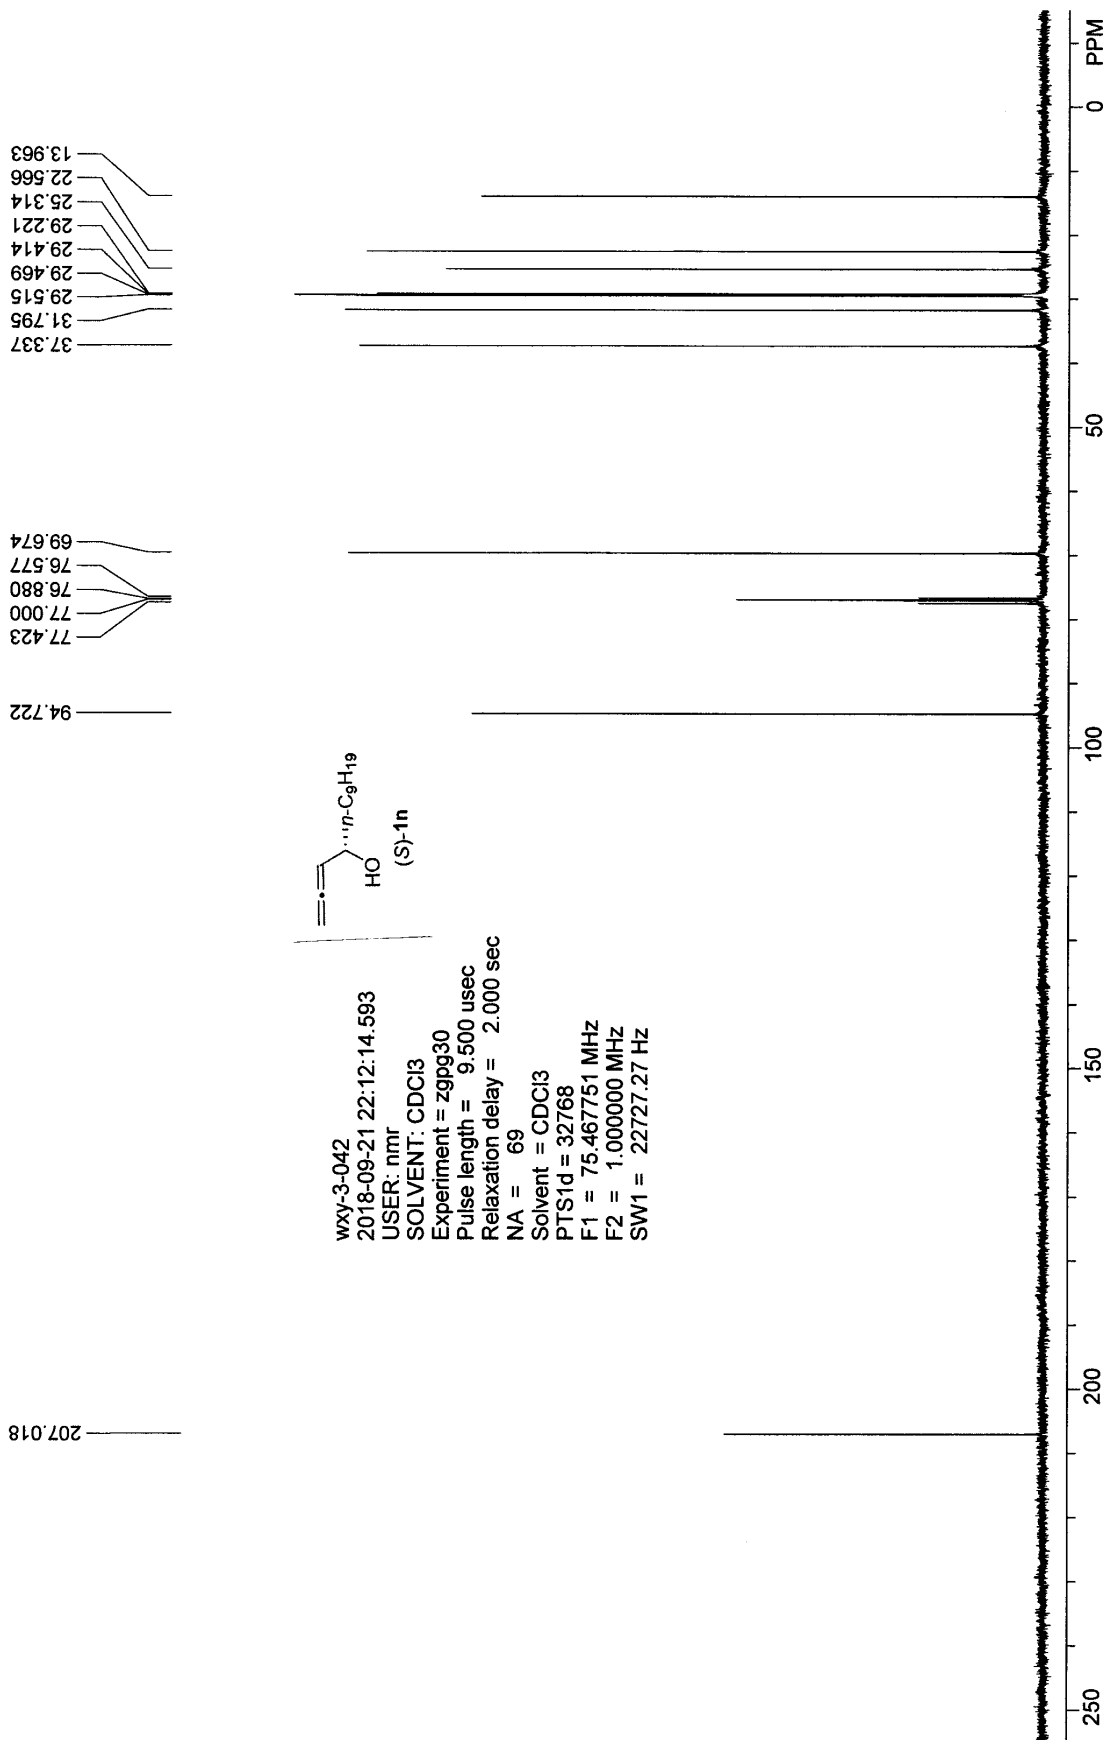

数据文件: C:\CHEM32\1\DATA\SIG10274.D  
样品名称: gbj-10-159-chiral

=====  
操作者 : wang  
仪器 : 仪器 1 位置 : 样品瓶 1  
进样日期 : 2018/10/16 10:57:21  
进样量 : 手动  
采集方法 : C:\CHEM32\1\METHODS\DEF\_GC7890A.M  
最后修改 : 2018/10/16 10:57:18 : wang  
(调用后修改)  
分析方法 : C:\CHEM32\1\METHODS\DEF\_GC-OFF.M  
最后修改 : 2018/10/17 15:43:04 : wang  
(调用后修改)  
样品信息 : rtbdex

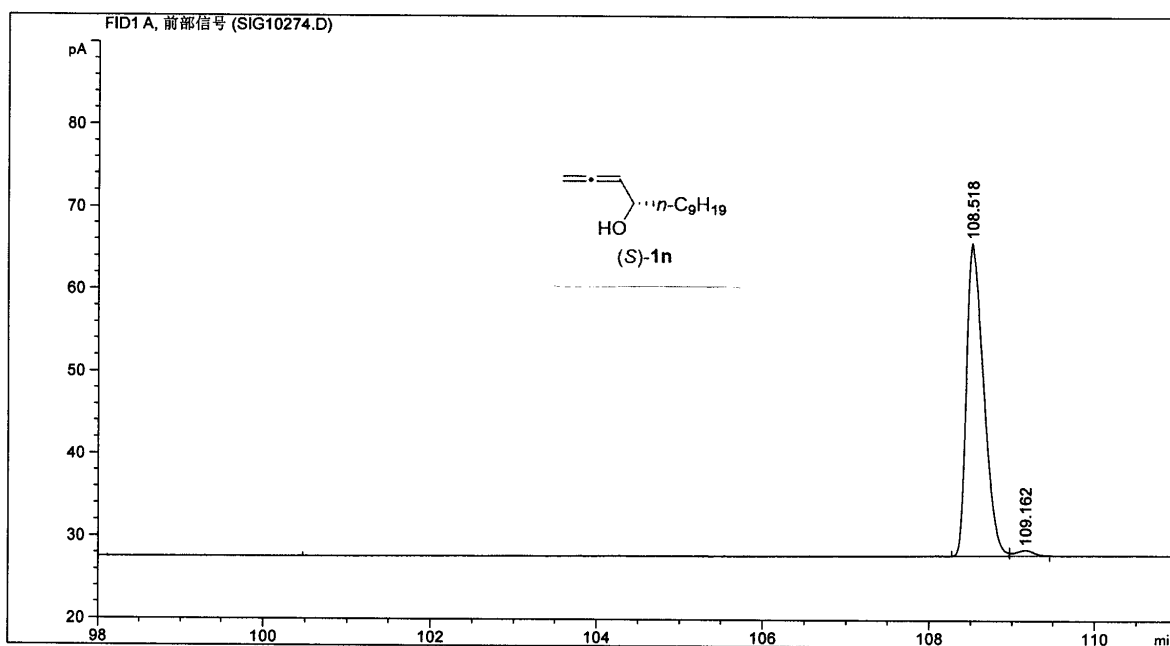

=====  
面积百分比报告  
=====

排序 : 信号  
乘积因子: : 1.0000  
稀释因子: : 1.0000  
内标使用乘积因子和稀释因子

信号 1: FID1 A, 前部信号

| 峰 # | 保留时间 [min] | 类型   | 峰宽 [min] | 峰面积 [pA*s] | 峰高 [pA]    | 峰面积 %    |
|-----|------------|------|----------|------------|------------|----------|
| 1   | 108.518    | MF R | 0.2375   | 545.44348  | 37.88842   | 98.13579 |
| 2   | 109.162    | FM R | 0.2529   | 10.36135   | 6.82758e-1 | 1.86421  |

总量 : 555.80483 38.57117

=====  
\*\*\* 报告结束 \*\*\*

数据文件: C:\CHEM32\1\DATA\SIG10271.D  
样品名称: gbj-10-159-rac

=====  
操作者 : wang  
仪器 : 仪器 1 位置 : 样品瓶 1  
进样日期 : 2018/10/15 12:46:07 进样量 : 手动  
采集方法 : C:\CHEM32\1\METHODS\DEF\_GC7890A.M  
最后修改 : 2018/10/15 12:46:06 : wang  
(调用后修改)  
分析方法 : C:\CHEM32\1\METHODS\DEF\_GC-OFF.M  
最后修改 : 2018/10/17 15:43:04 : wang  
(调用后修改)  
样品信息 : rtbdex

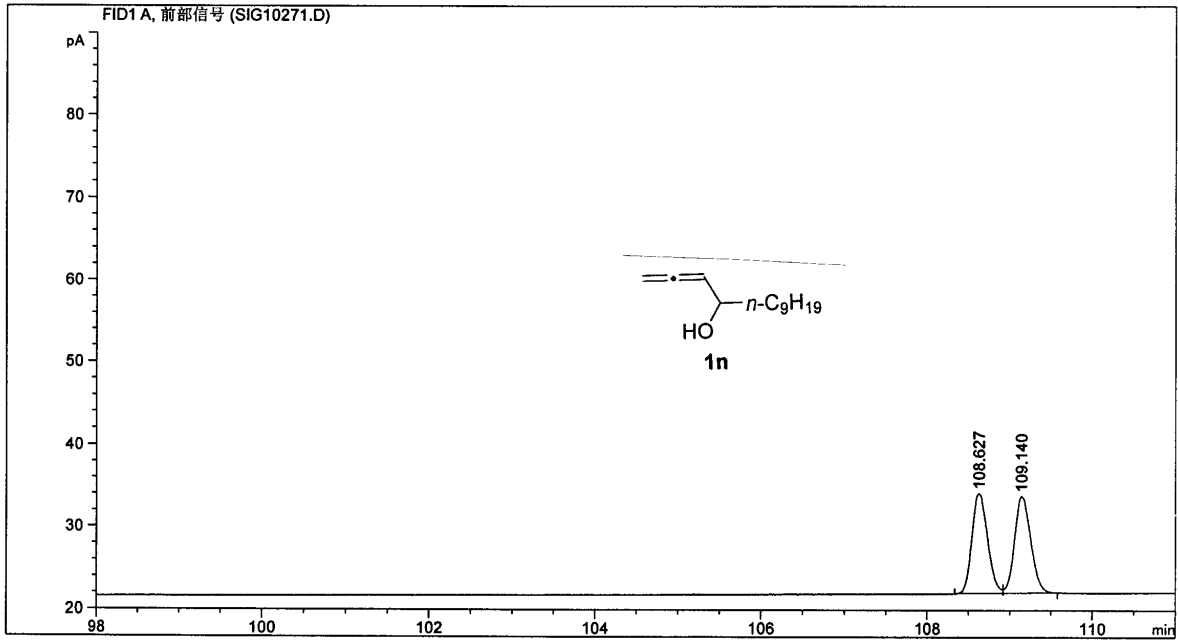

=====  
面积百分比报告  
=====

排序 : 信号  
乘积因子: : 1.0000  
稀释因子: : 1.0000  
内标使用乘积因子和稀释因子

信号 1: FID1 A, 前部信号

| 峰 # | 保留时间 [min] | 类型   | 峰宽 [min] | 峰面积 [pA*s] | 峰高 [pA]  | 峰面积 %    |
|-----|------------|------|----------|------------|----------|----------|
| 1   | 108.627    | MF R | 0.2082   | 159.14456  | 12.14610 | 49.78487 |
| 2   | 109.140    | FM R | 0.2143   | 160.51993  | 11.79749 | 50.21513 |

总量 : 319.66449 23.94359

=====  
\*\*\* 报告结束 \*\*\*

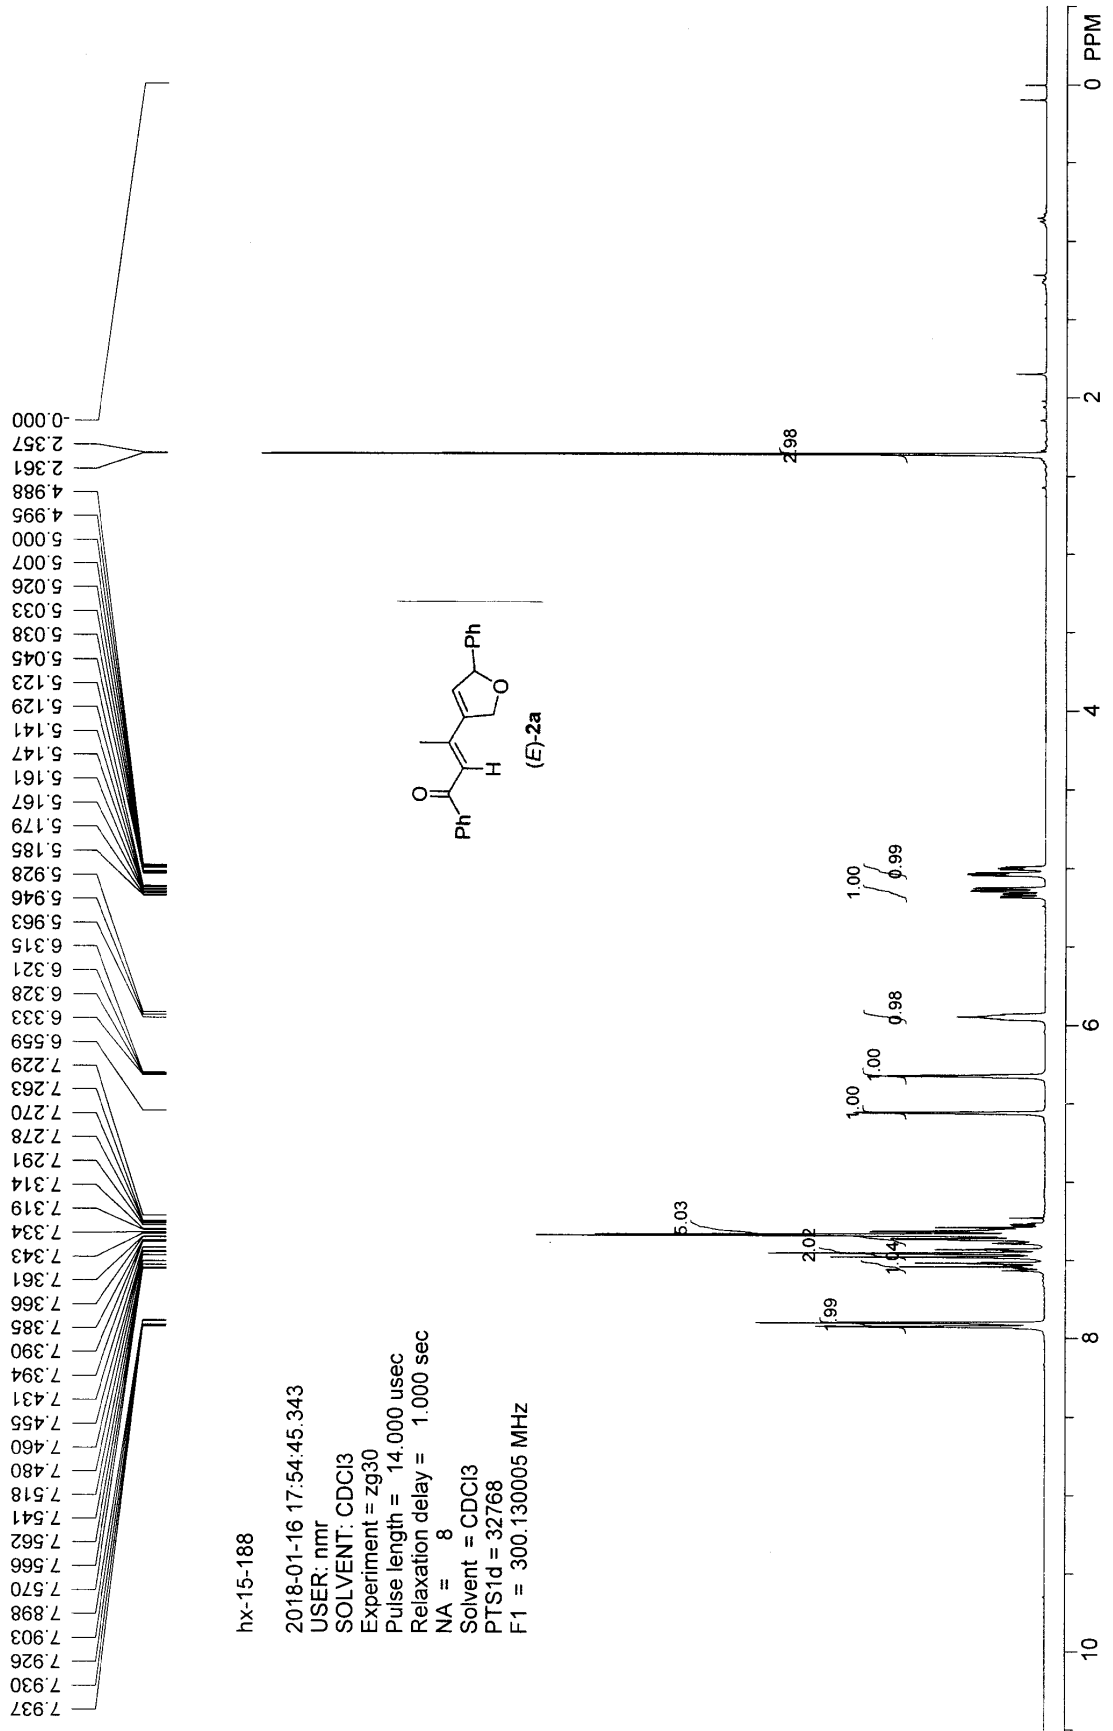

7.937  
7.930  
7.926  
7.903  
7.898  
7.570  
7.566  
7.562  
7.541  
7.518  
7.480  
7.460  
7.455  
7.431  
7.394  
7.390  
7.385  
7.366  
7.361  
7.343  
7.334  
7.319  
7.314  
7.291  
7.278  
7.270  
7.263  
7.229  
6.559  
6.333  
6.328  
6.321  
6.315  
5.963  
5.946  
5.928  
5.185  
5.179  
5.167  
5.161  
5.147  
5.141  
5.129  
5.123  
5.045  
5.038  
5.033  
5.026  
5.007  
5.000  
4.995  
4.988  
2.361  
2.357  
-0.000

hx-15-188  
2018-01-16 17:54:45.343  
USER: nmr  
SOLVENT: CDCl3  
Experiment = zg30  
Pulse length = 14.000 usec  
Relaxation delay = 1.000 sec  
NA = 8  
Solvent = CDCl3  
PTS1d = 32768  
F1 = 300.130005 MHz

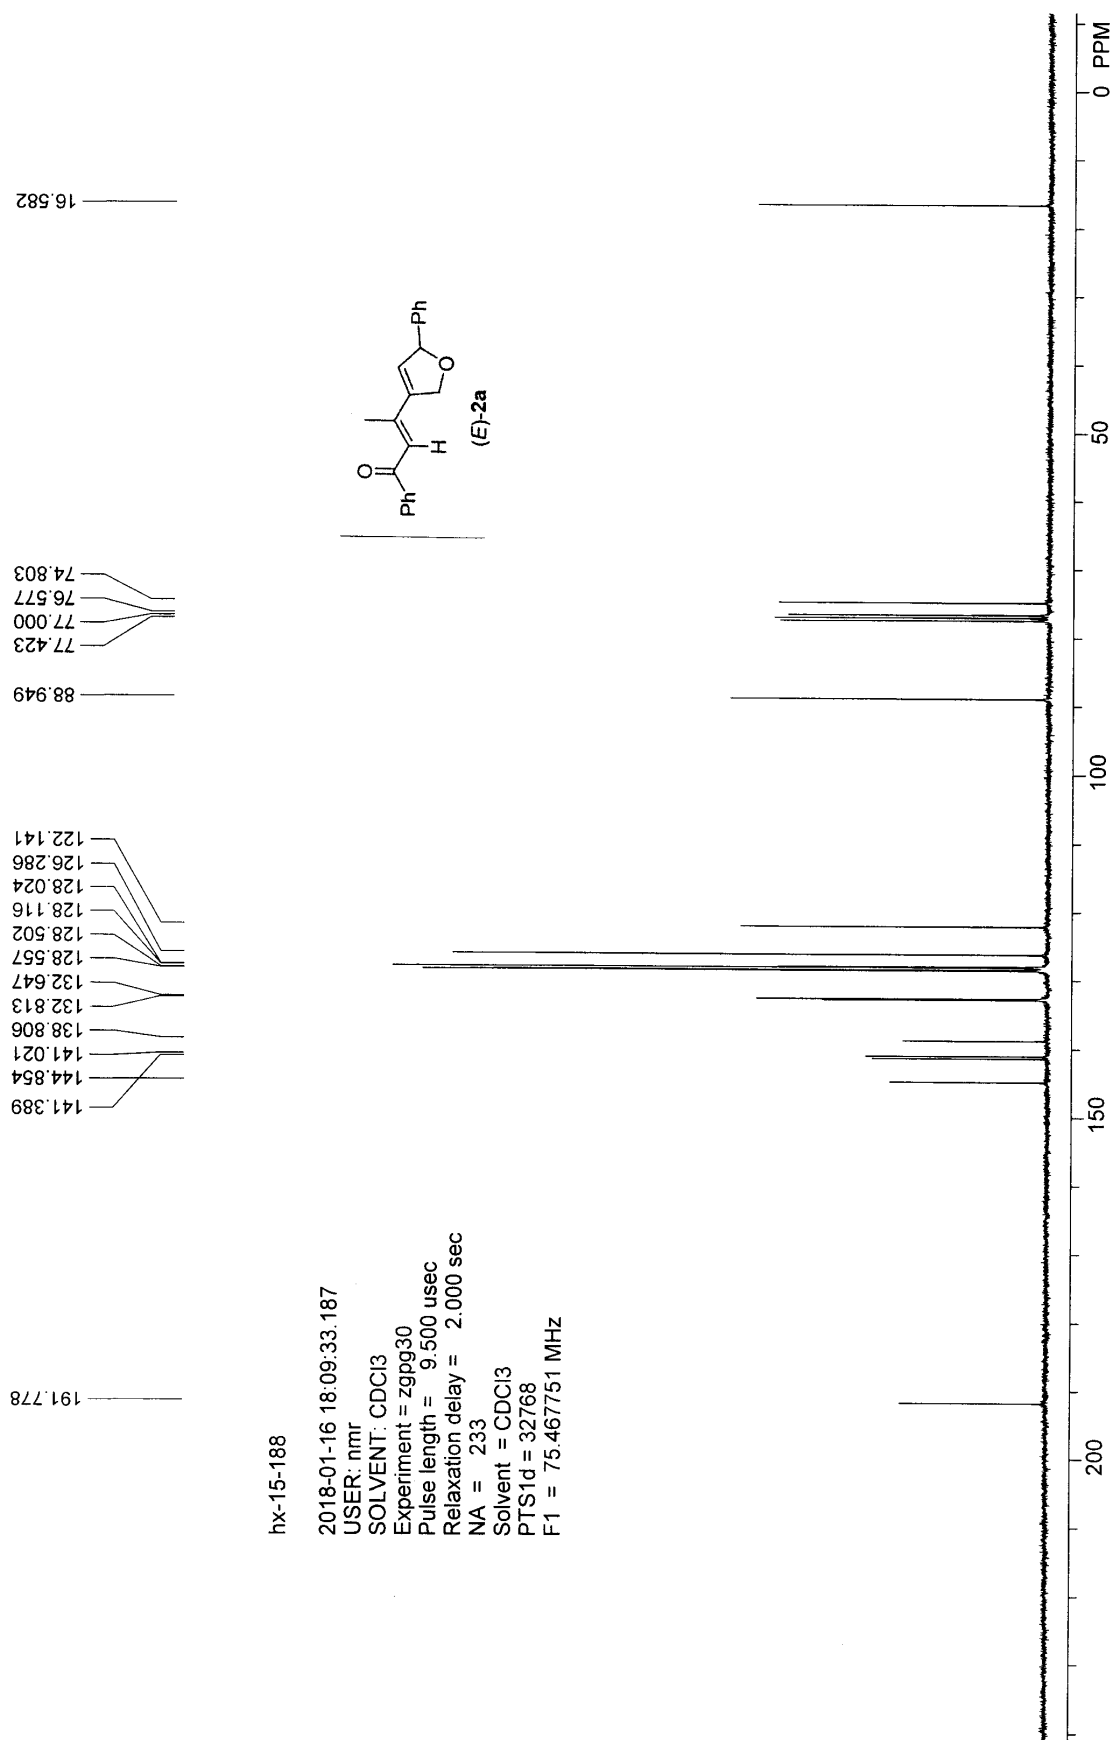

hx-15-188

2018-01-16 18:09:33.187

USER: nmr

SOLVENT: CDCl3

Experiment = zgpg30

Pulse length = 9.500 usec

Relaxation delay = 2.000 sec

NA = 233

Solvent = CDCl3

PTS1d = 32768

F1 = 75.467751 MHz

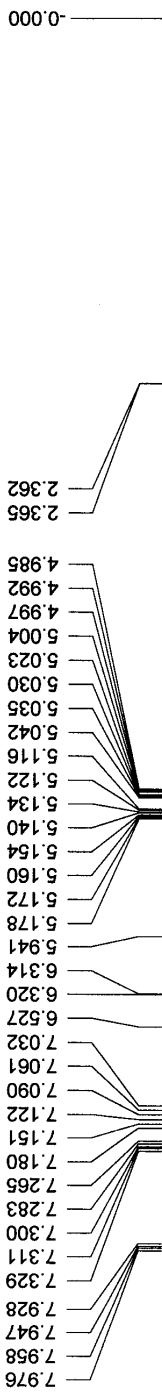

wxy-1-155  
 2018-04-05 15:22:30.062  
 USER: nmr  
 SOLVENT: CDCl3  
 Experiment = zg30  
 Pulse length = 14.000 usec  
 Relaxation delay = 1.000 sec  
 NA = 8  
 Solvent = CDCl3  
 PTS1d = 32768  
 F1 = 300.130005 MHz  
 F2 = 1.000000 MHz  
 SW1 = 6188.12 Hz

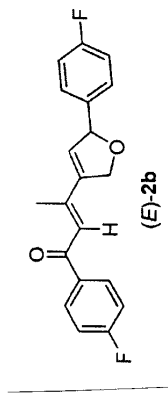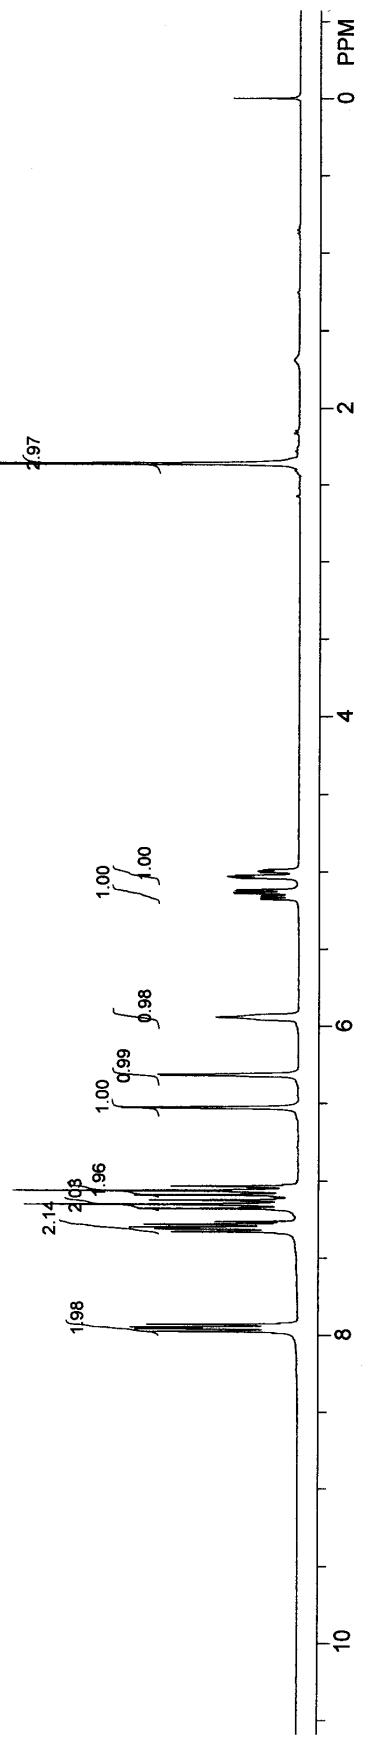

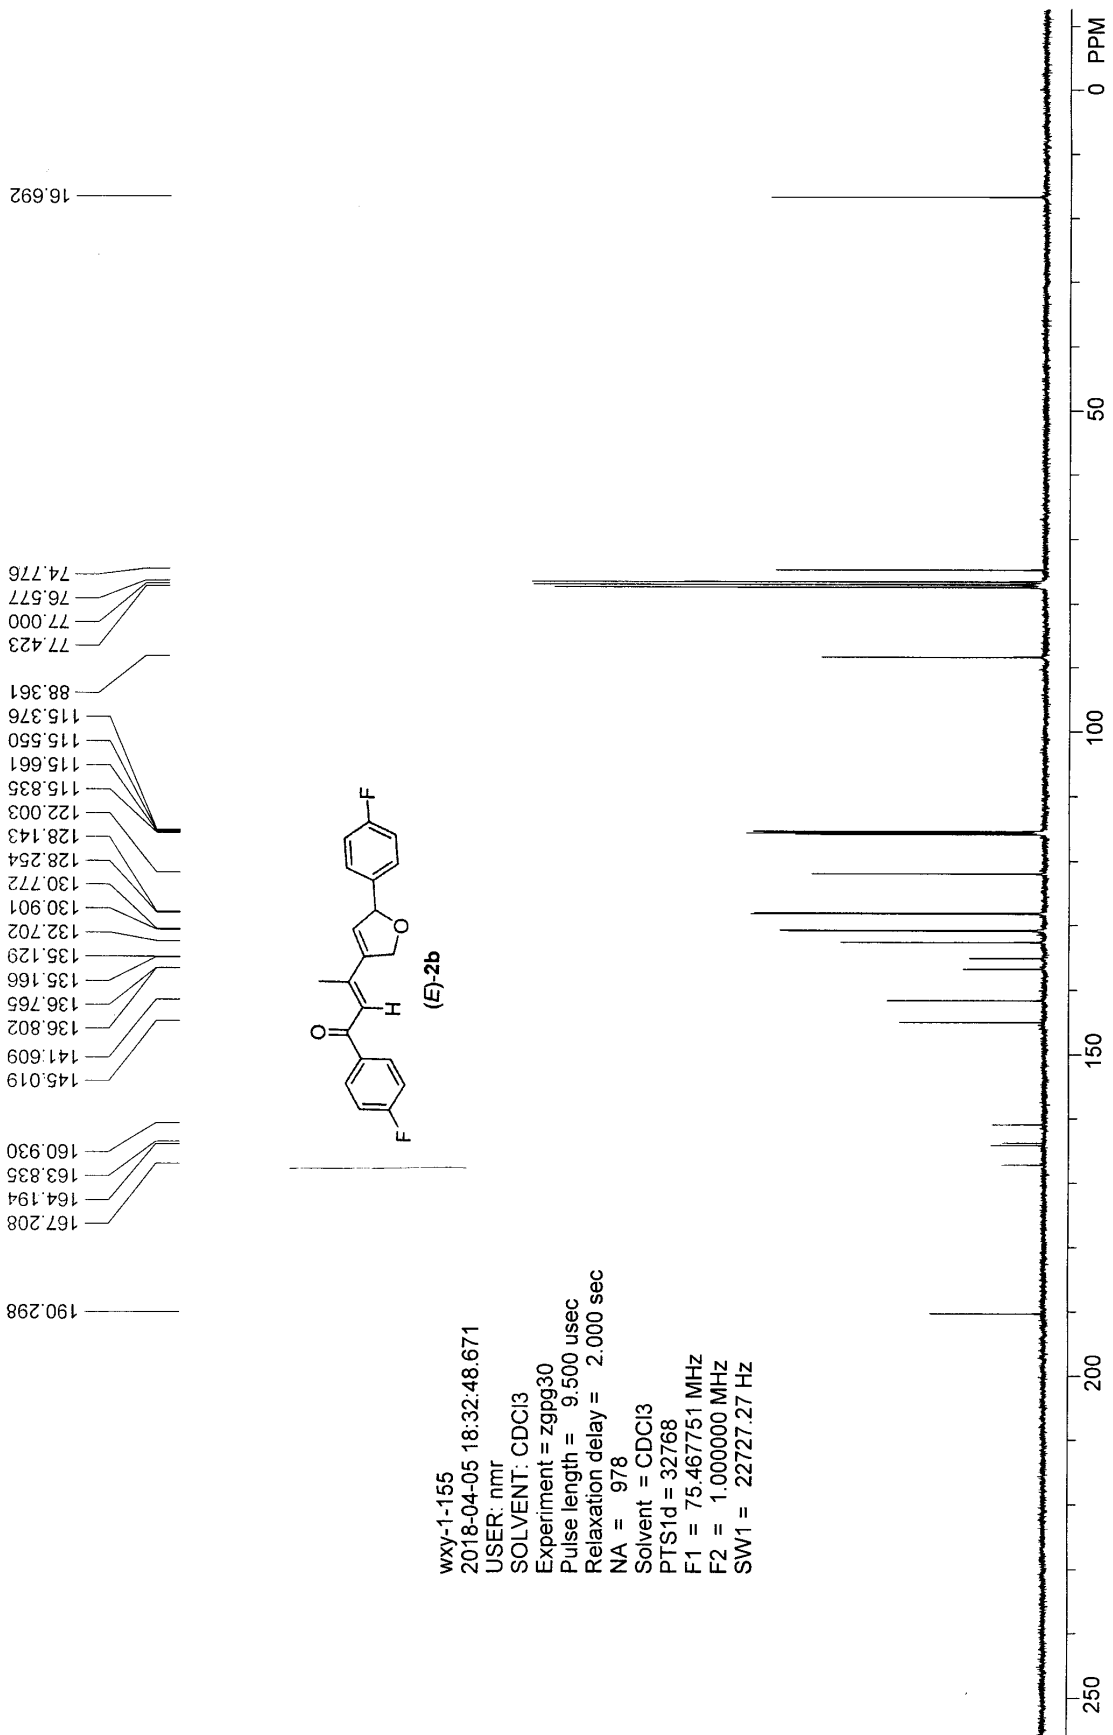

wxy-1-155  
 2018-04-05 18:32:48.671  
 USER: nmr  
 SOLVENT: CDCl3  
 Experiment = zgpg30  
 Pulse length = 9.500 usec  
 Relaxation delay = 2.000 sec  
 NA = 978  
 Solvent = CDCl3  
 PTS1d = 32768  
 F1 = 75.467751 MHz  
 F2 = 1.000000 MHz  
 SW1 = 22727.27 Hz



0.000

105.877

114.426

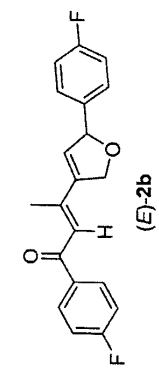

wxy-1-155  
2018-04-28 16:52:51.375  
USER: nmf  
SOLVENT: CDCl3  
Experiment = zgfgqn  
Pulse length = 13.500 usec  
Relaxation delay = 1.000 sec  
NA = 16  
Solvent = CDCl3  
PTS1d = 65536  
F1 = 282.404358 MHz  
F2 = 1.000000 MHz  
SW1 = 73529.41 Hz

-200 PPM

-150

-100

-50

0

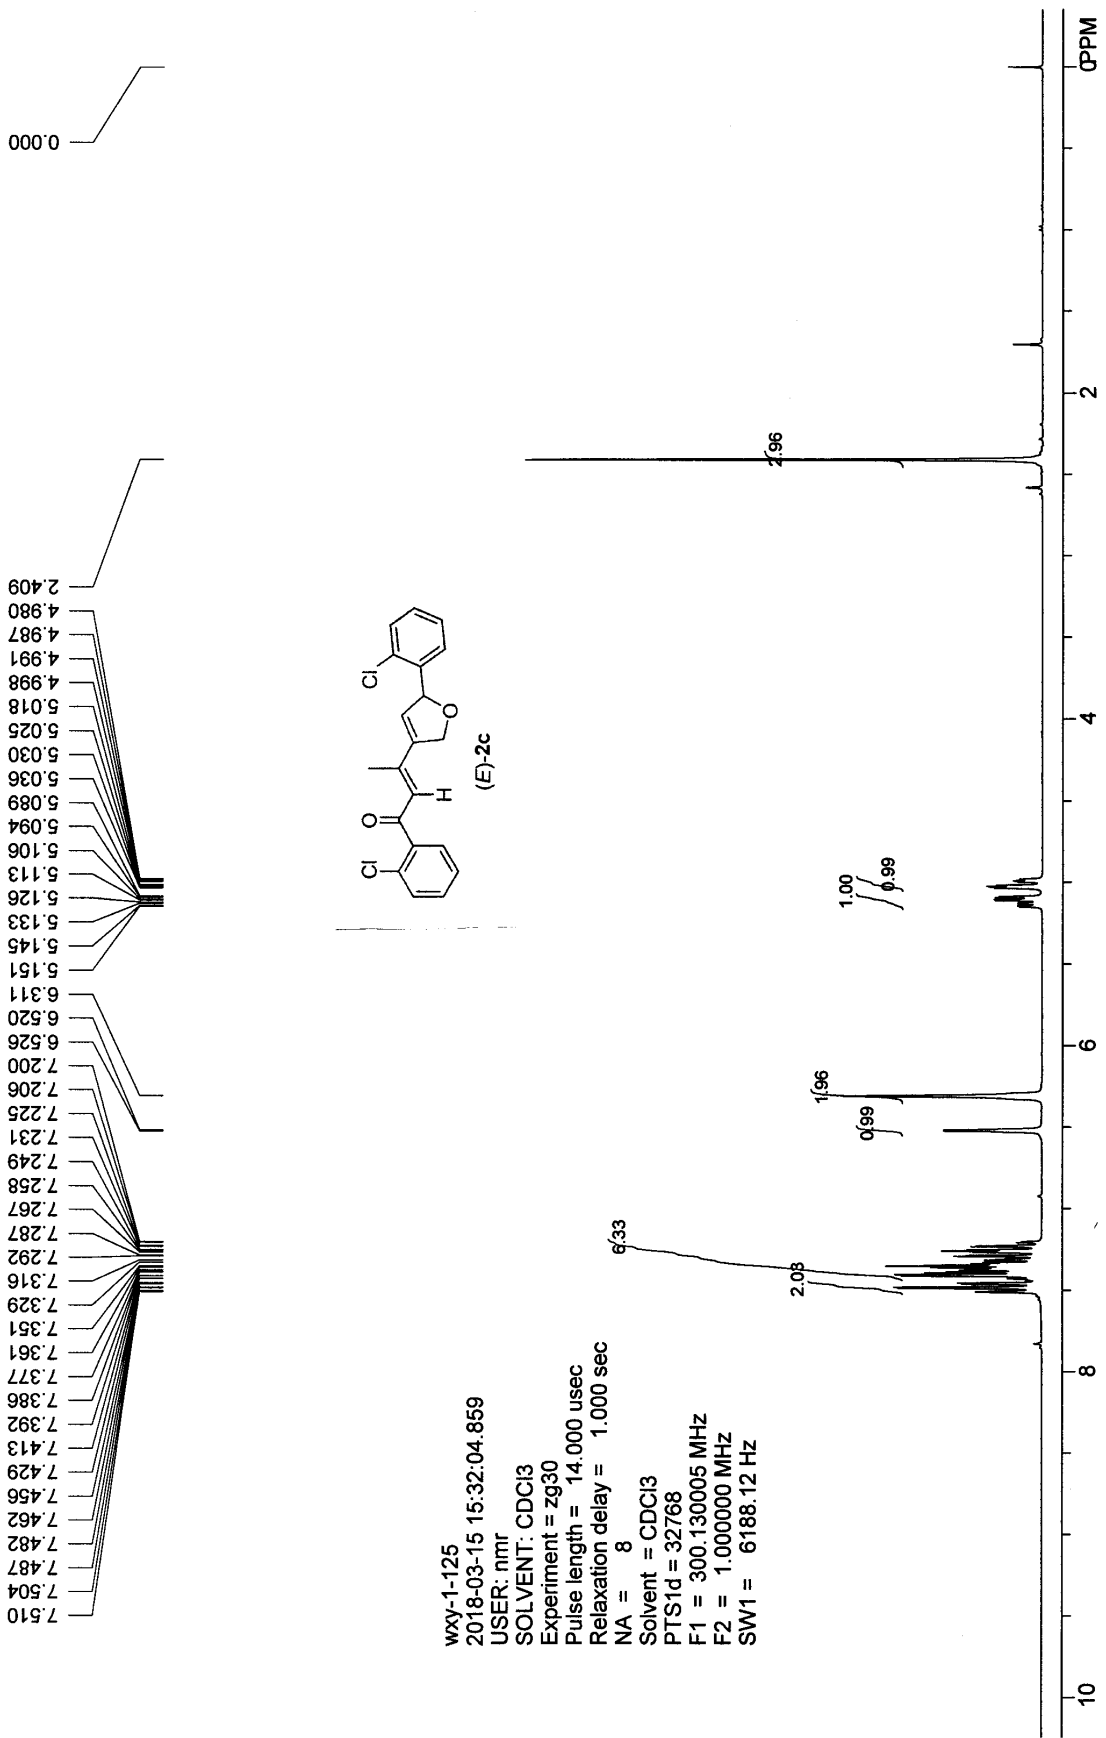

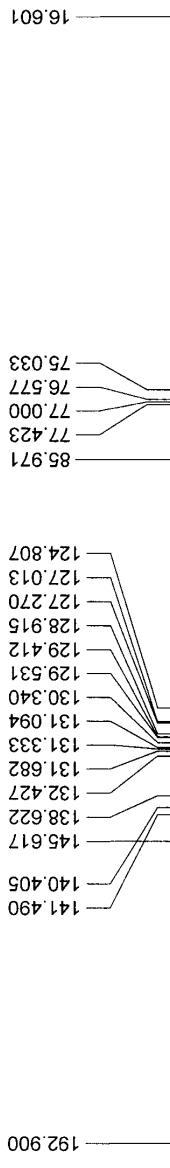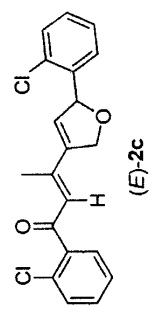

wxy-1-125  
2018-03-15 16:06:28.375  
USER: nmr  
SOLVENT: CDCl3  
Experiment = zgpg30  
Pulse length = 9.500 usec  
Relaxation delay = 2.000 sec  
NA = 572  
Solvent = CDCl3  
PTS1d = 32768  
F1 = 75.467751 MHz  
F2 = 1.000000 MHz  
SW1 = 22727.27 Hz

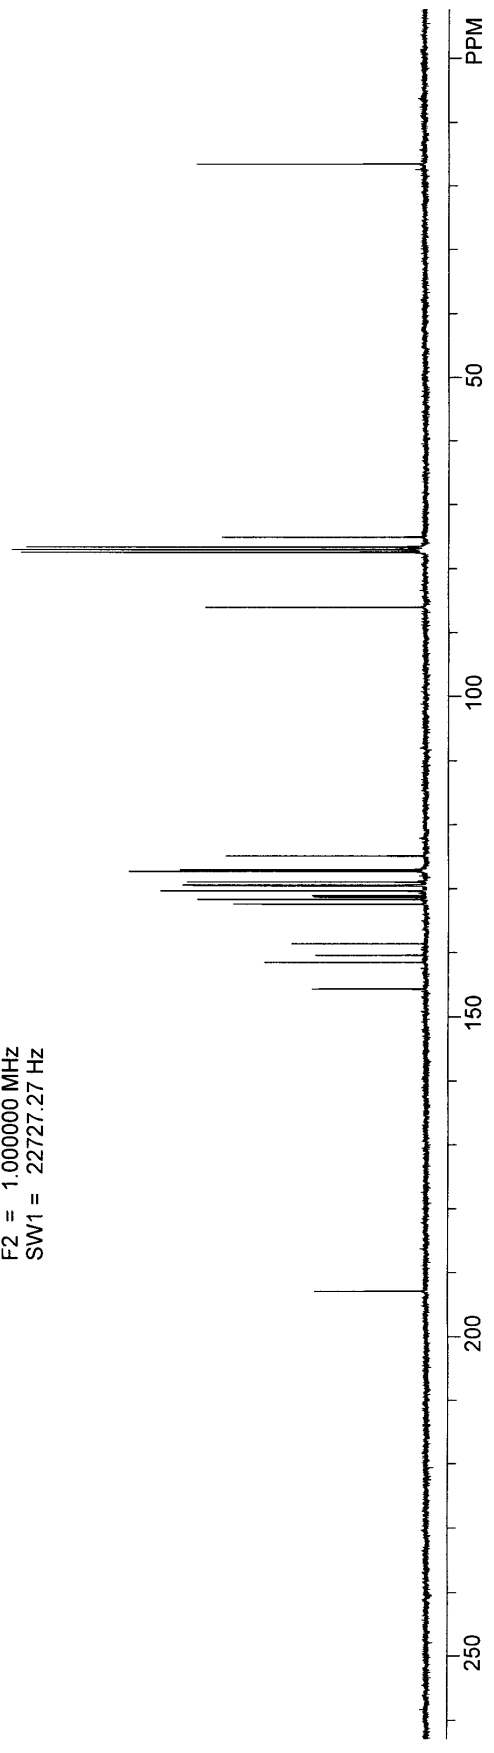

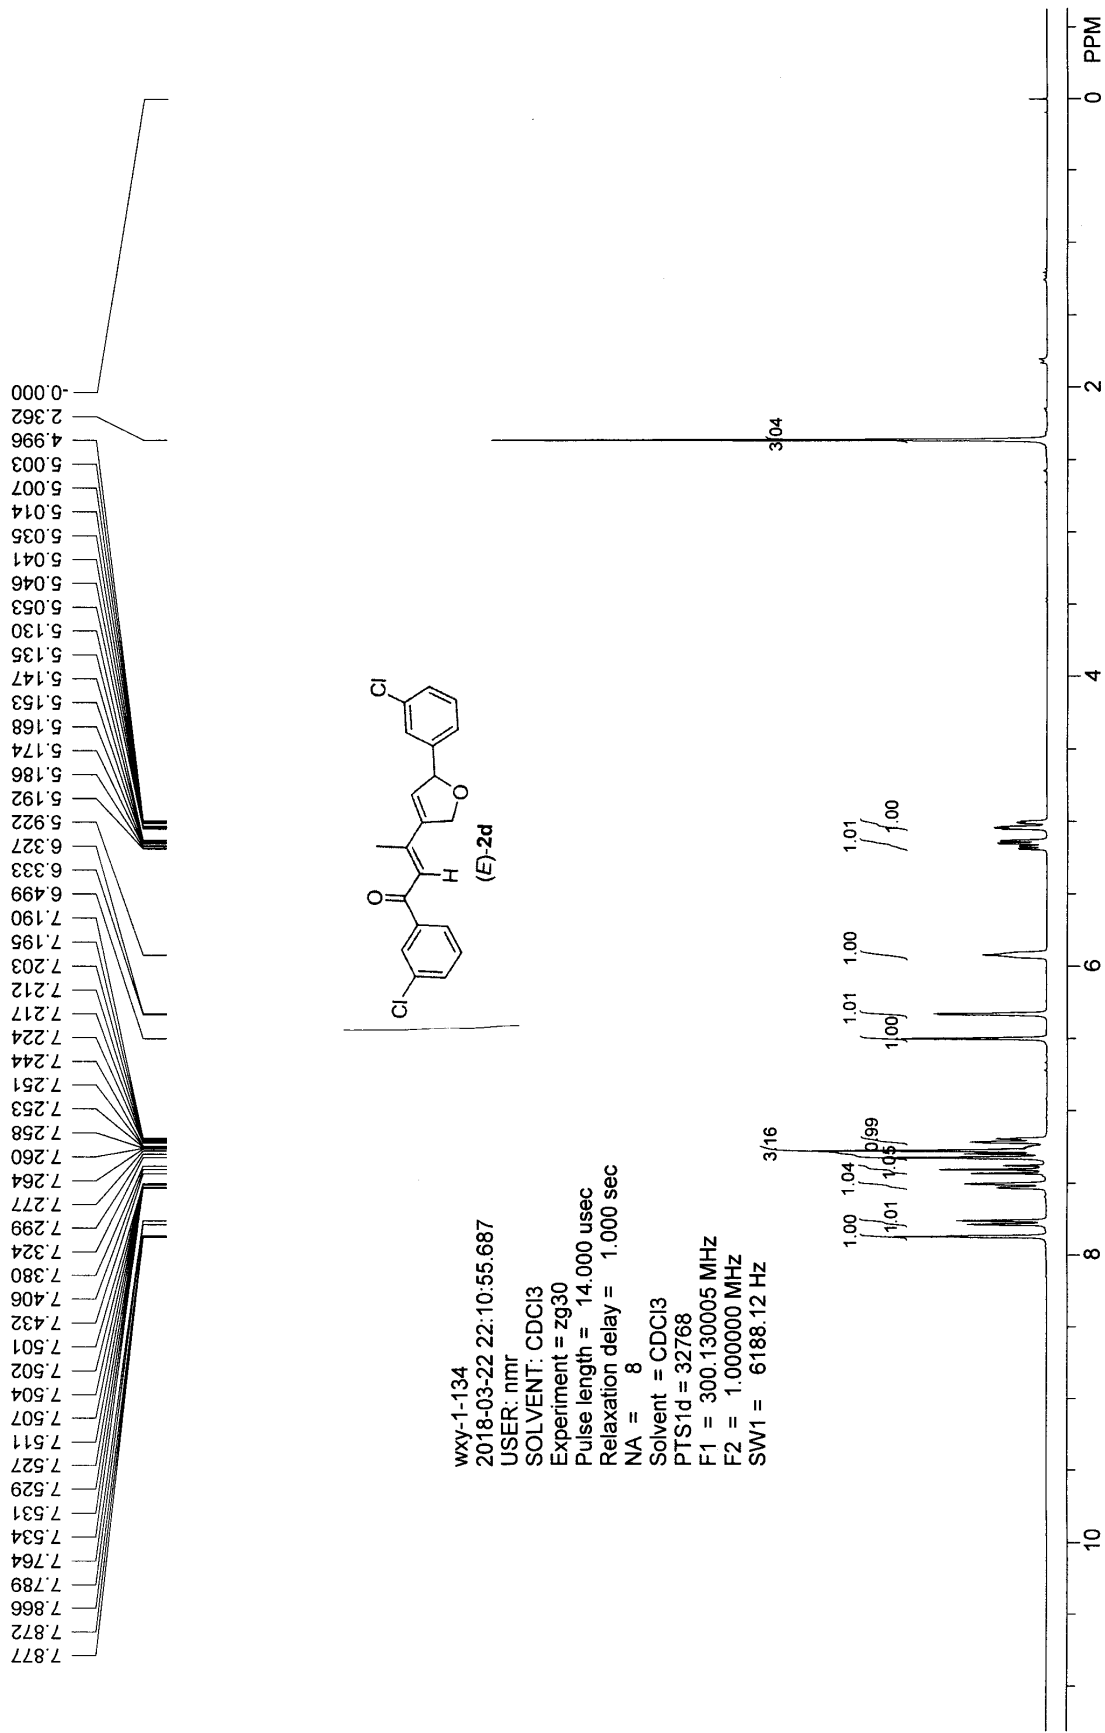

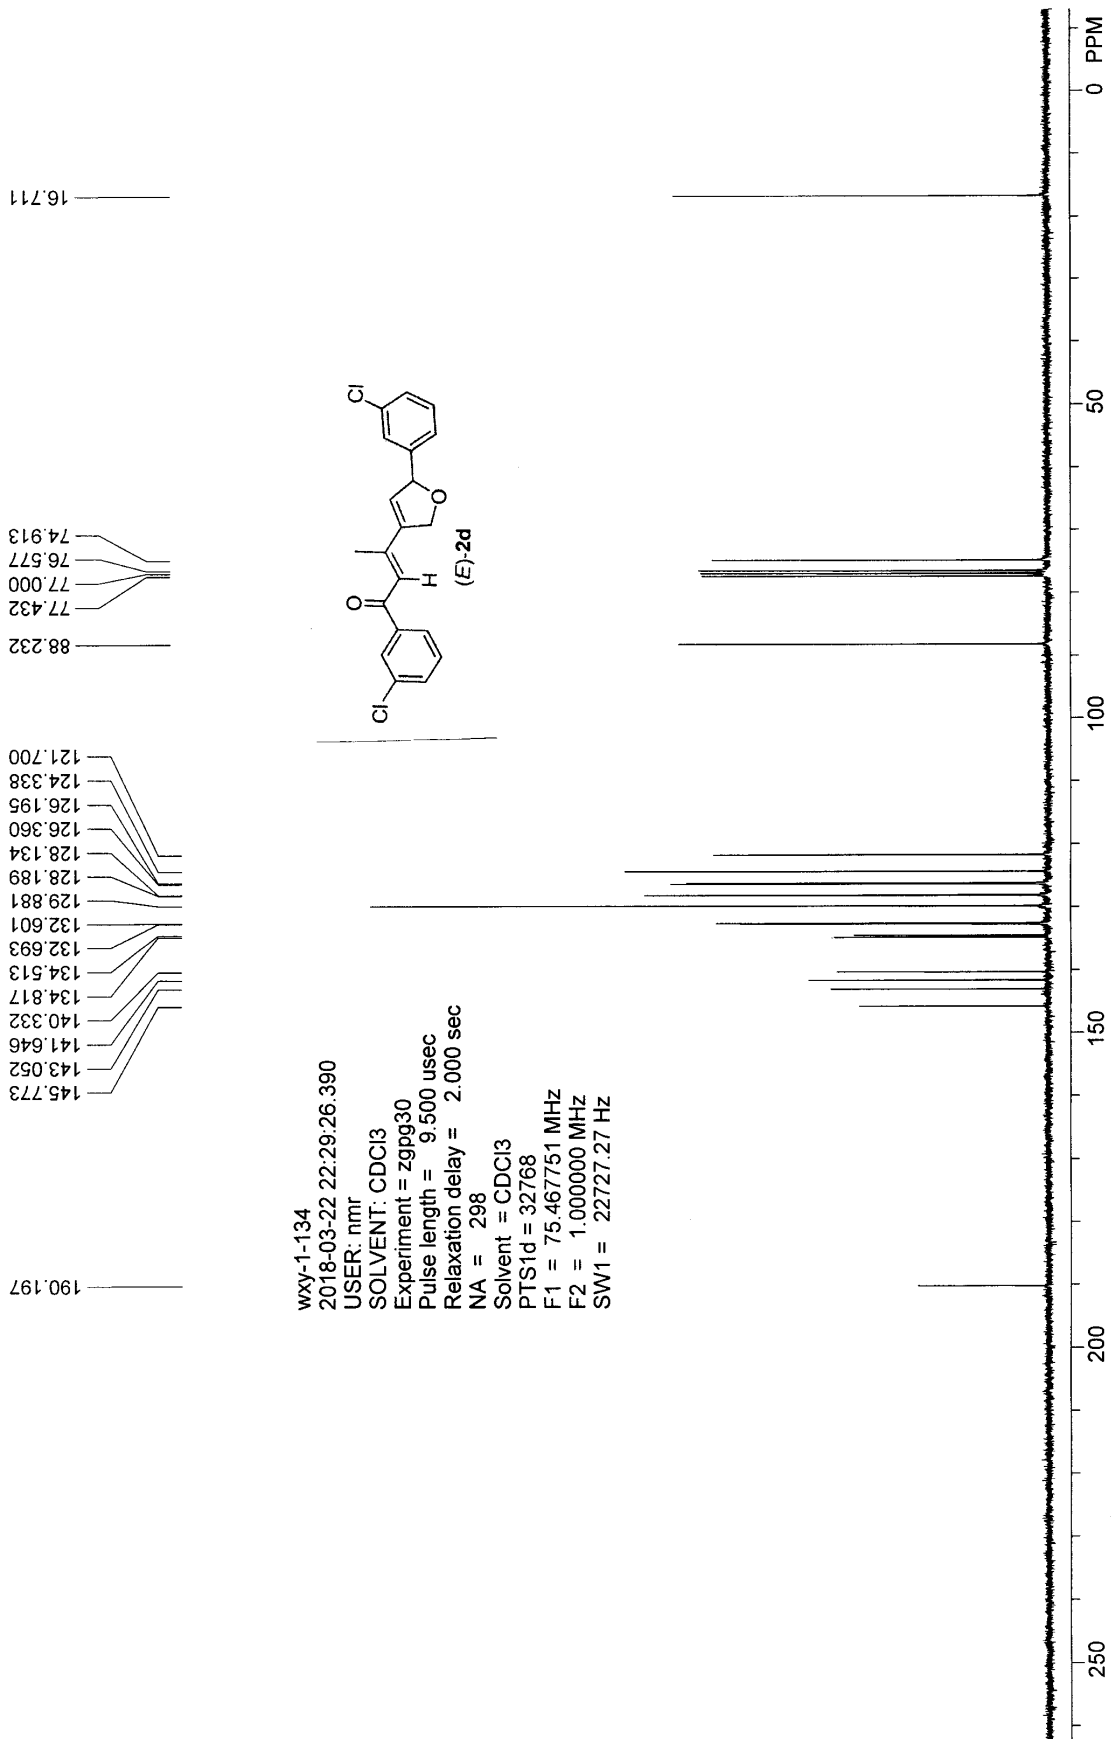

8.026  
8.021  
7.833  
7.807  
7.688  
7.685  
7.662  
7.658  
7.479  
7.442  
7.436  
7.428  
7.420  
7.414  
7.406  
7.371  
7.344  
7.319  
7.270  
7.265  
7.249  
7.227  
7.202  
6.491  
6.331  
6.325  
5.914  
5.189  
5.183  
5.171  
5.165  
5.150  
5.145  
5.133  
5.127  
5.049  
5.042  
5.038  
5.031  
5.011  
5.004  
4.999  
4.992  
2.360

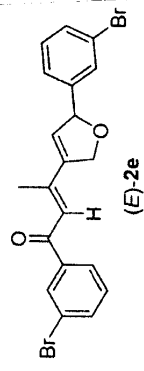

wxy-1-192-1  
2018-04-30 19:04:31.281  
USER: nmr  
SOLVENT: CDCl3  
Experiment = zg30  
Pulse length = 14.000 usec  
Relaxation delay = 1.000 sec  
NA = 8  
Solvent = CDCl3  
PTS'd = 32768  
F1 = 300.130005 MHz  
F2 = 1.000000 MHz  
SW1 = 6188.12 Hz

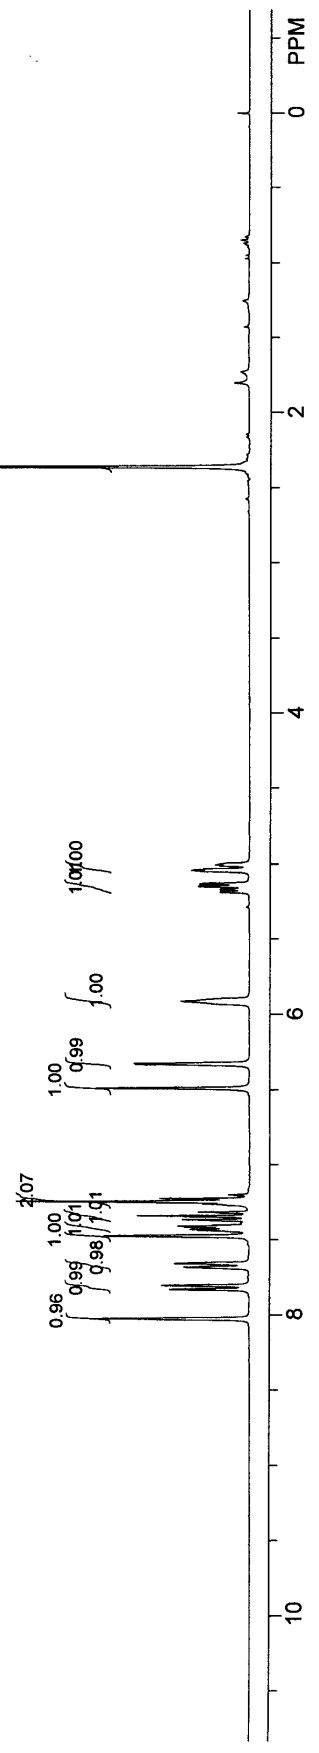

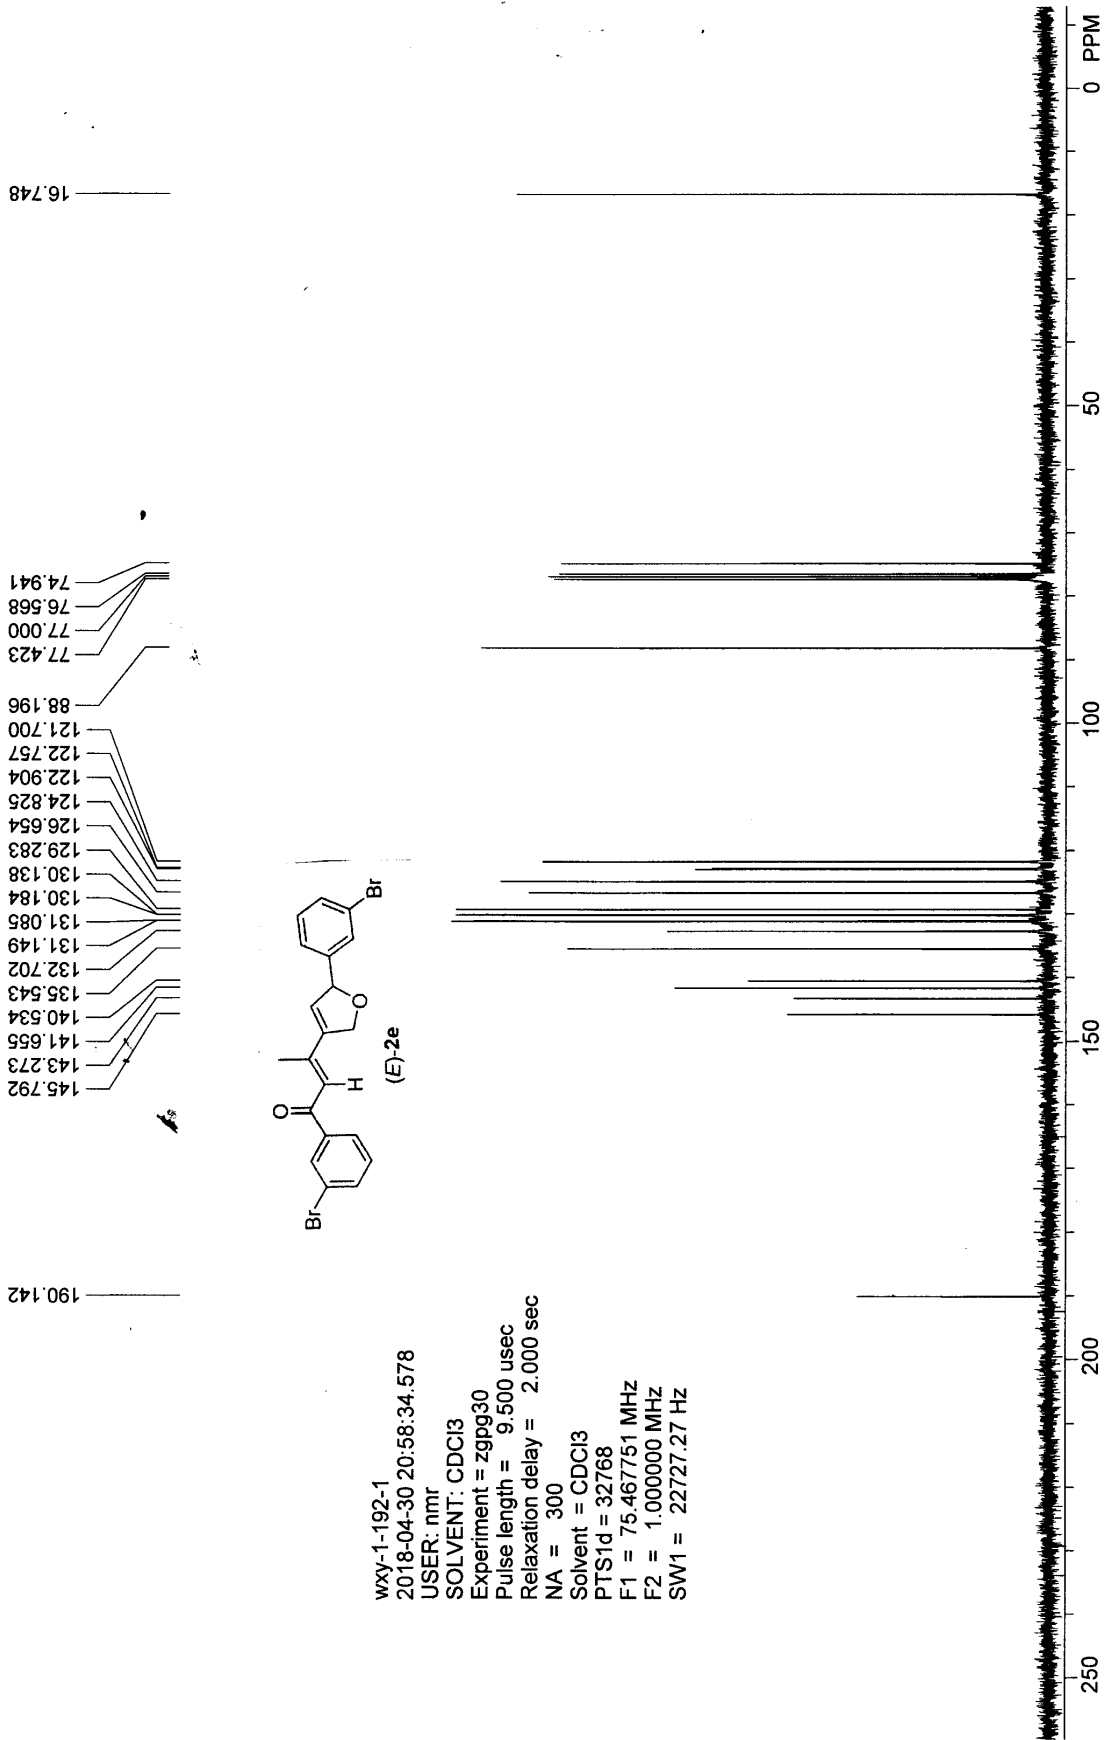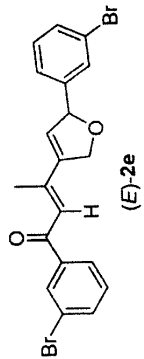

wxy-1-192-1  
 2018-04-30 20:58:34.578  
 USER: nmr  
 SOLVENT: CDCl3  
 Experiment = zgpg30  
 Pulse length = 9.500 usec  
 Relaxation delay = 2.000 sec  
 NA = 300  
 Solvent = CDCl3  
 PTD1d = 32768  
 F1 = 75.467751 MHz  
 F2 = 1.000000 MHz  
 SW1 = 22727.27 Hz

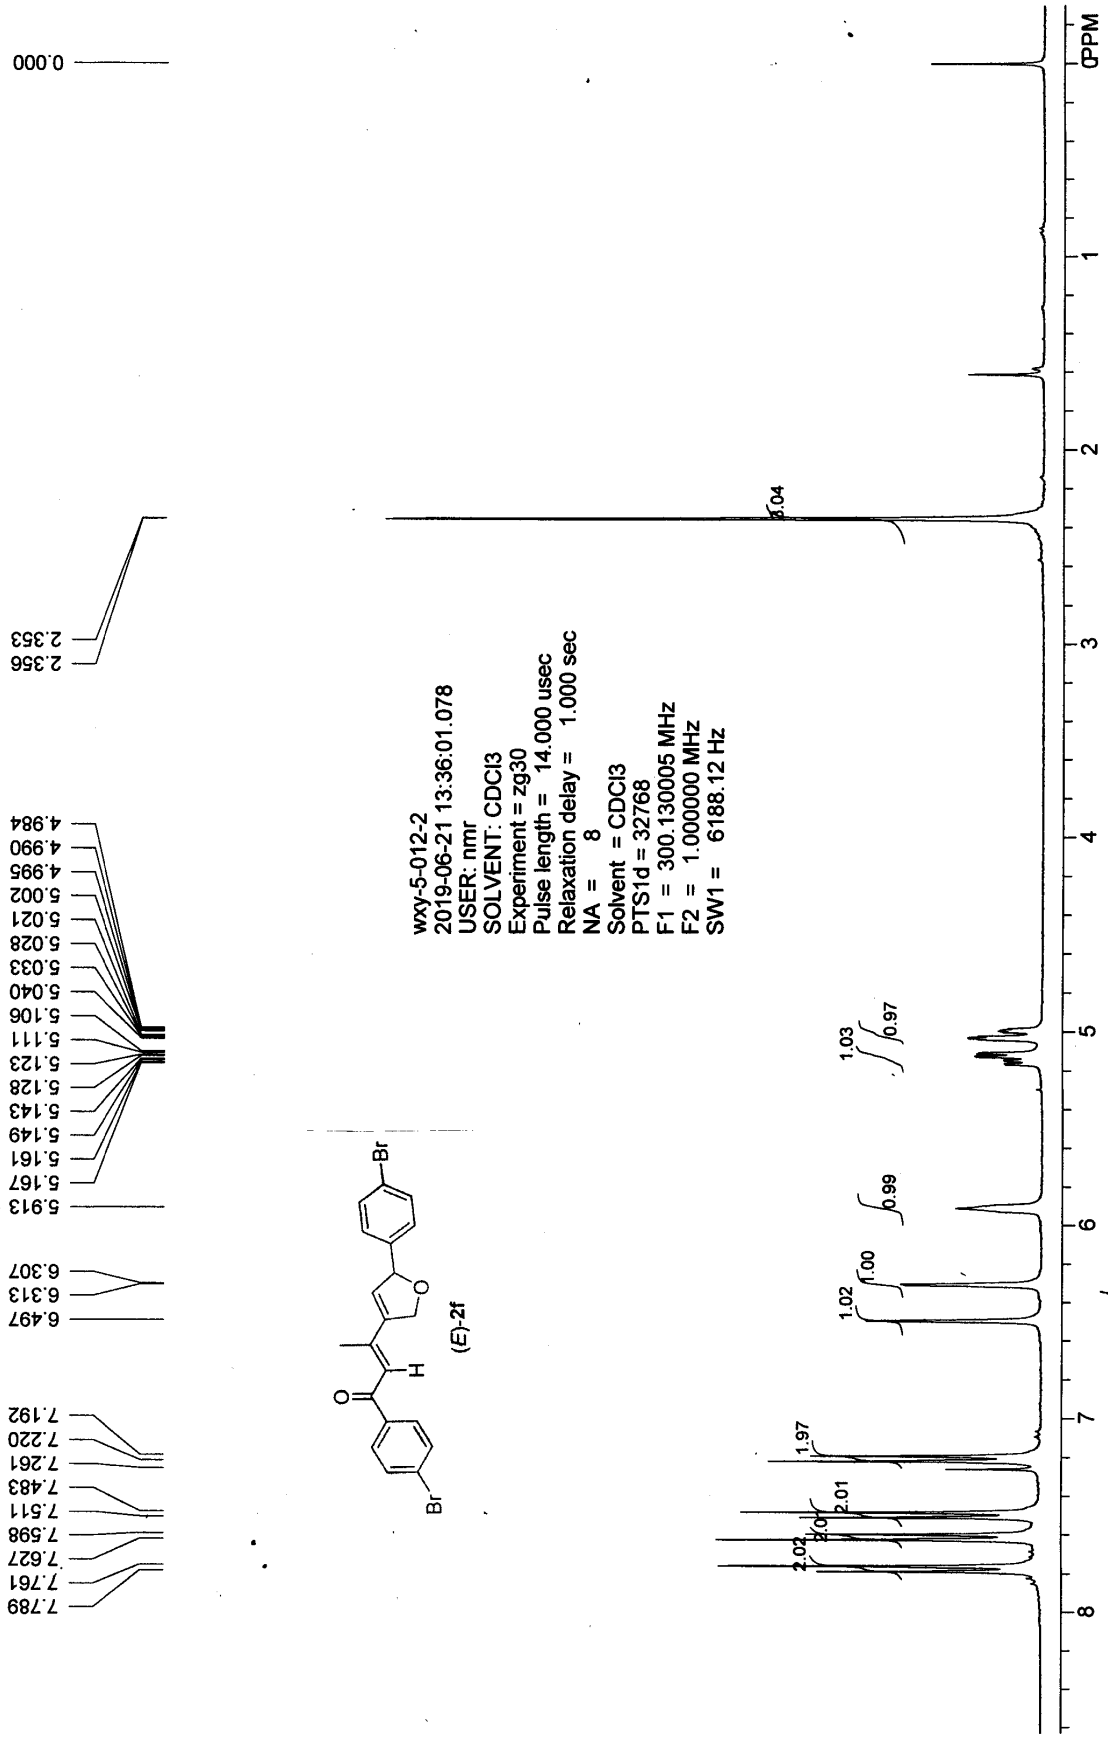



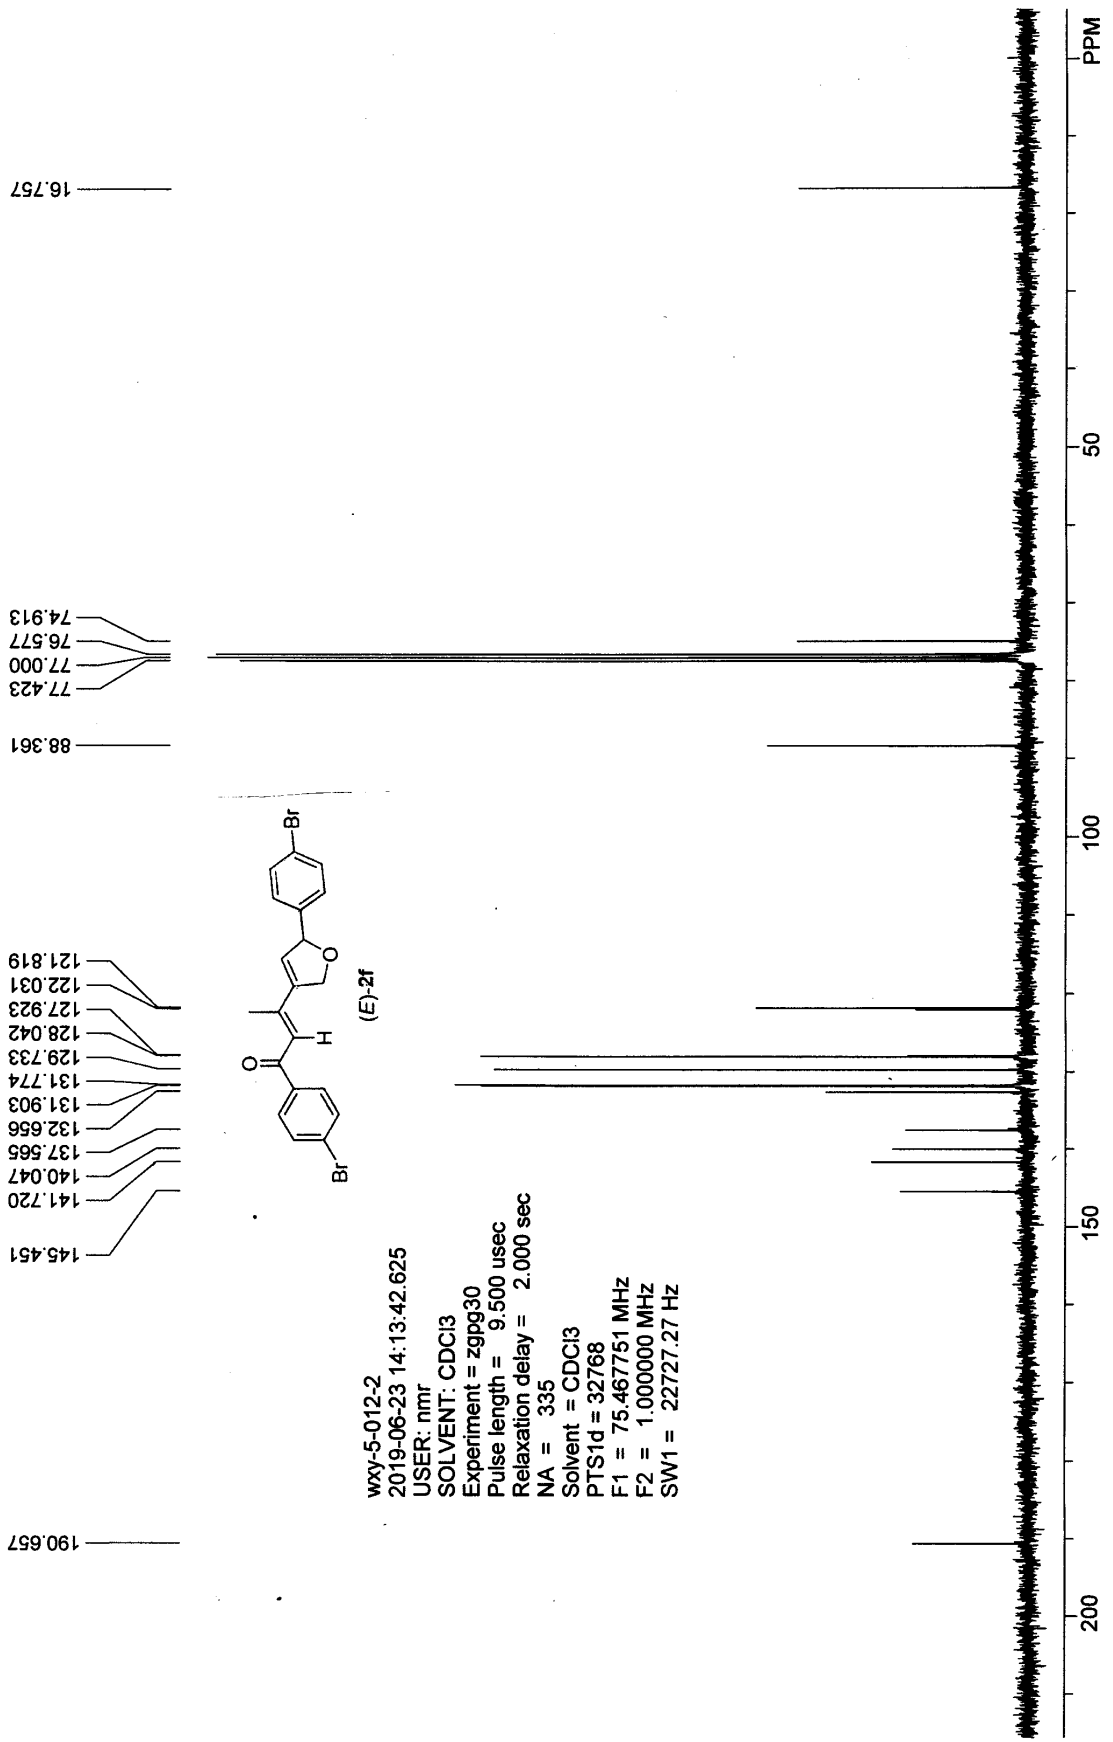

wxy-5-012-2  
 2019-06-23 14:13:42.625  
 USER: nmr  
 SOLVENT: CDCl3  
 Experiment = zgpg30  
 Pulse length = 9.500 usec  
 Relaxation delay = 2.000 sec  
 NA = 335  
 Solvent = CDCl3  
 PTS1d = 32768  
 F1 = 75.467751 MHz  
 F2 = 1.000000 MHz  
 SW1 = 22727.27 Hz

7.860  
7.832  
7.778  
7.635  
7.607  
7.591  
7.584  
7.562  
7.552  
7.530  
7.522  
7.262  
7.101  
6.921

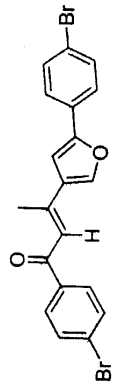

wxy-5-012-1  
2019-06-21 16:51:34.312  
USER: nmr  
SOLVENT: CDCl3  
Experiment = zg30  
Pulse length = 14.000 usec  
Relaxation delay = 1.000 sec  
NA = 10  
Solvent = CDCl3  
PTS1d = 32768  
F1 = 300.130005 MHz  
F2 = 1.000000 MHz  
SW1 = 6188.12 Hz

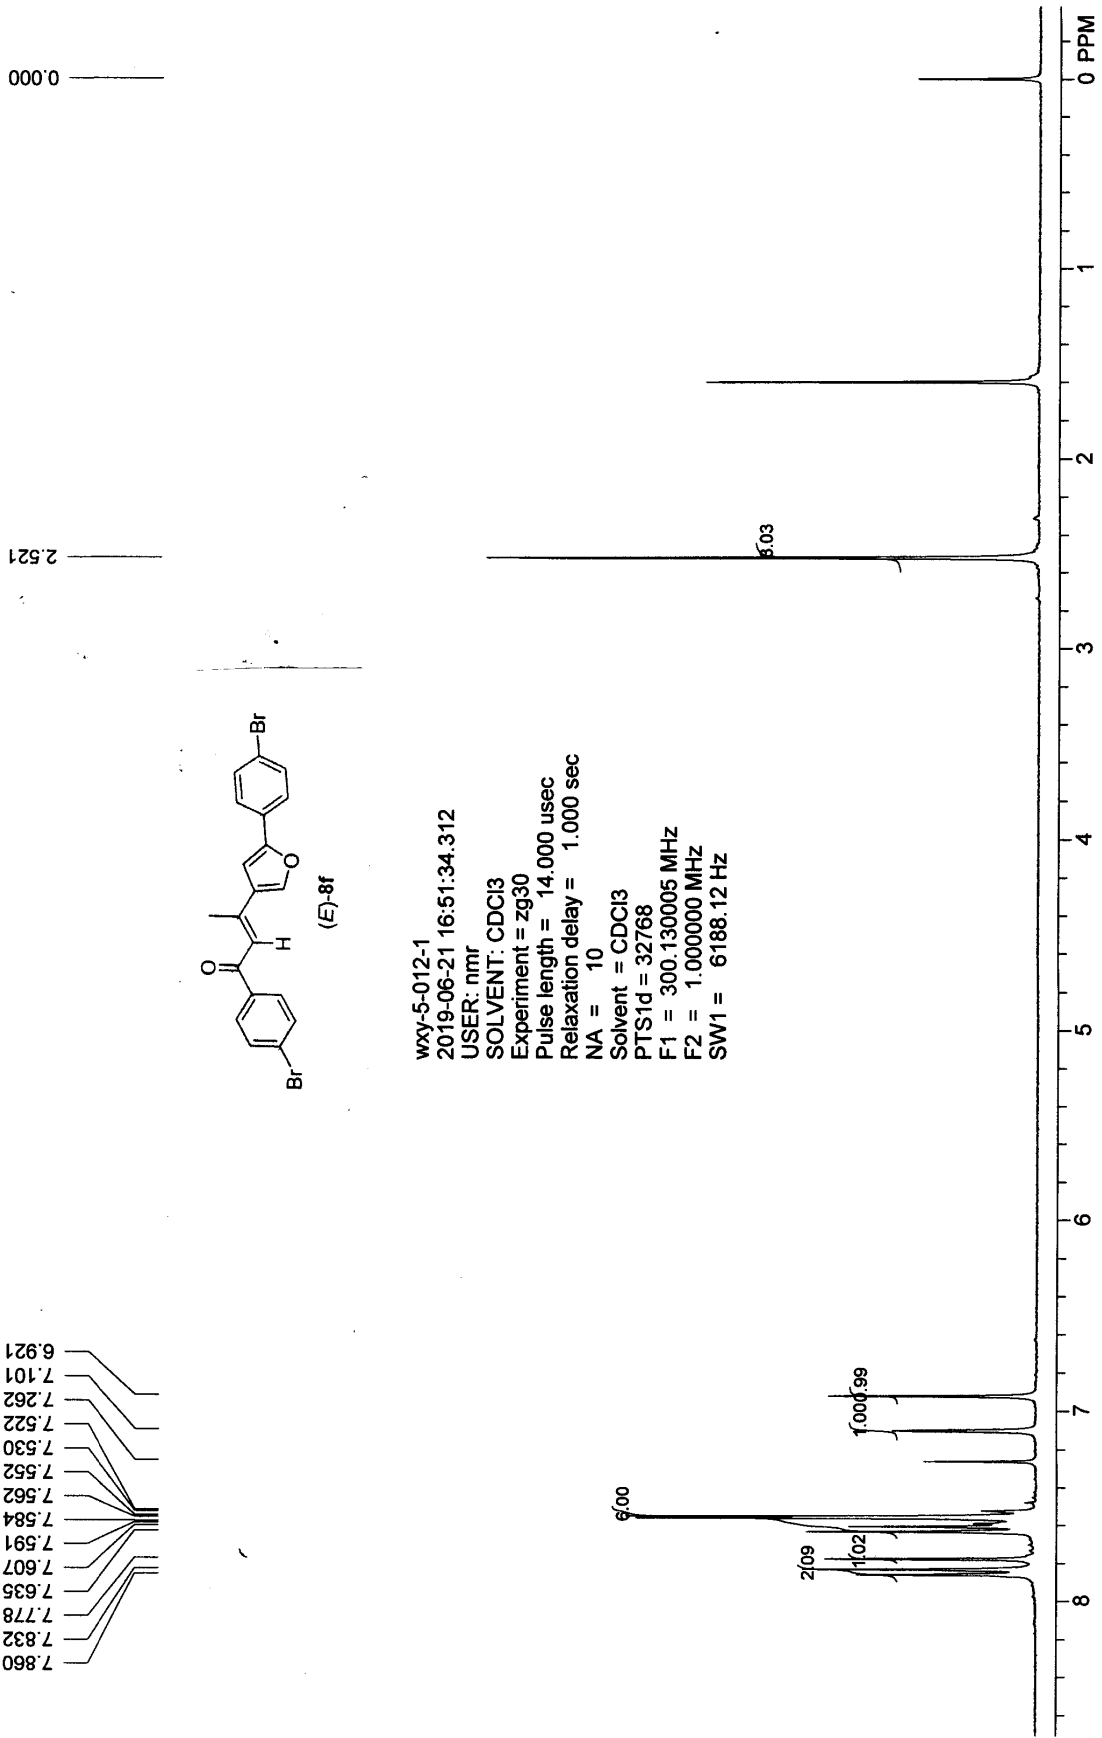

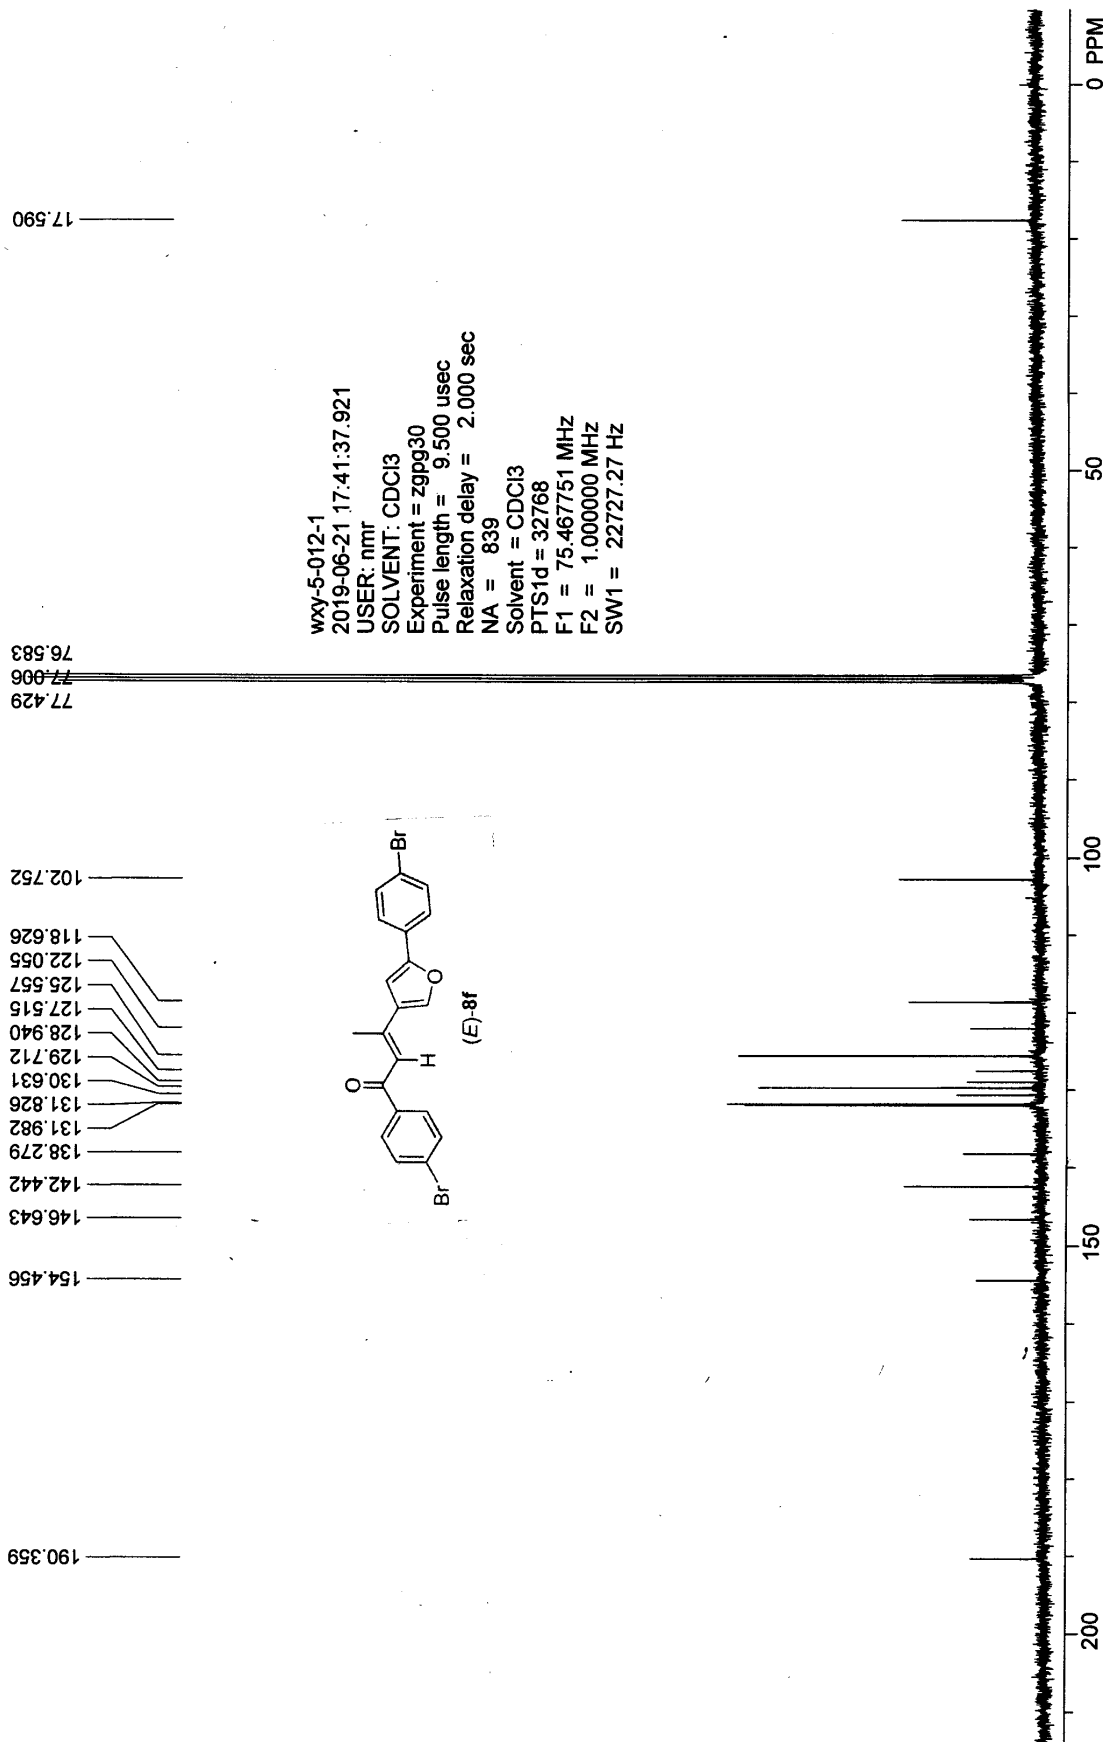



wxy-1-151  
 2018-04-02 20:43:48.578  
 USER: nmr  
 SOLVENT: CDCl3  
 Experiment = zpgp30  
 Pulse length = 9.500 usec  
 Relaxation delay = 2.000 sec  
 NA = 265  
 Solvent = CDCl3  
 PTS1d = 32768  
 F1 = 75.467751 MHz  
 F2 = 1.000000 MHz  
 SW1 = 22727.27 Hz

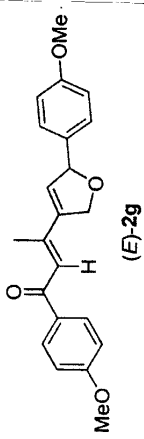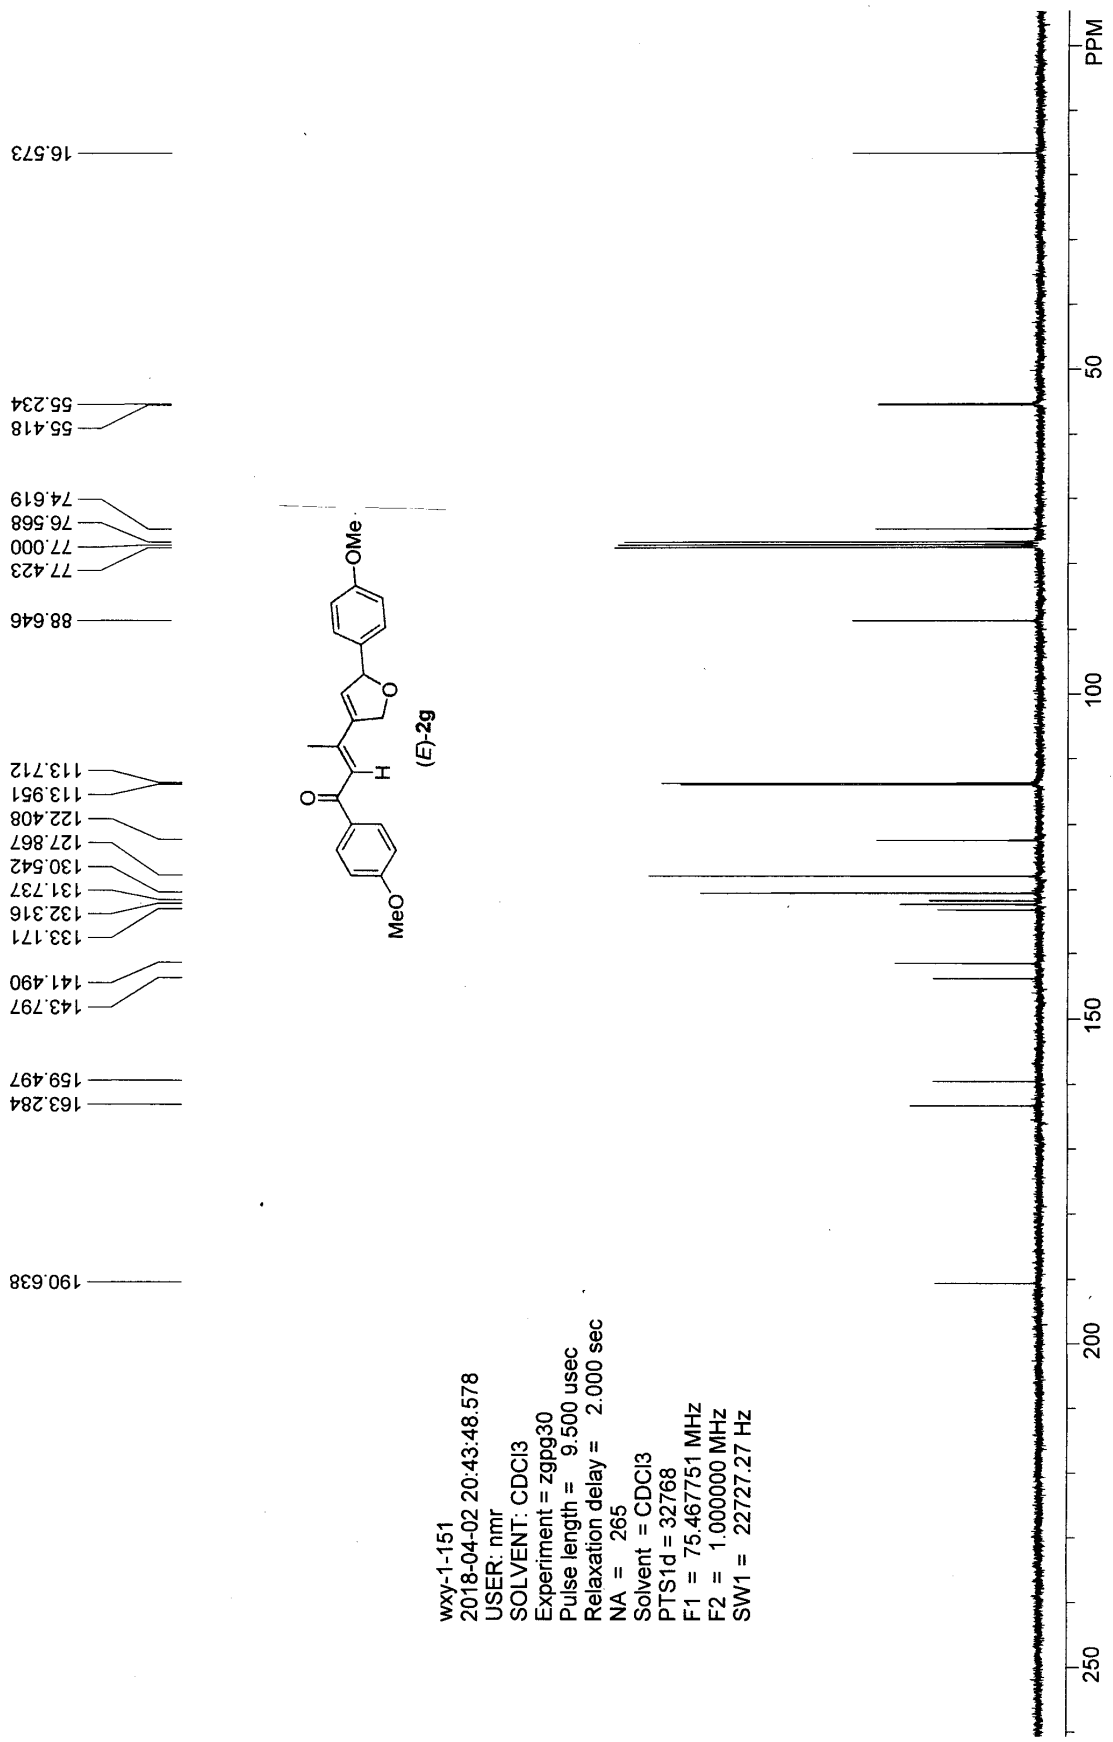

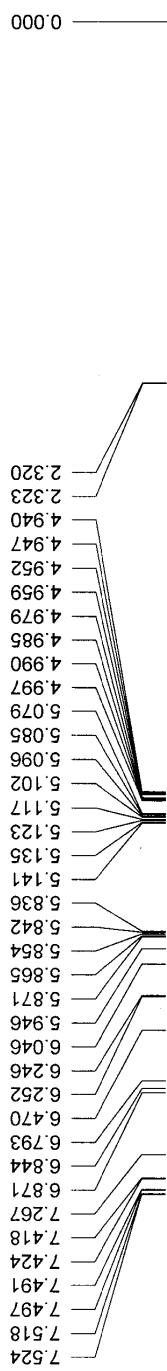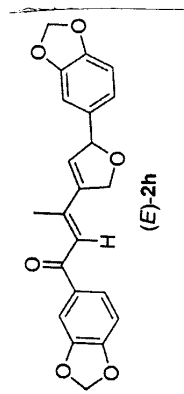

wxy-1-147-3  
2018-03-28 18:31:43.421  
USER: nmr  
SOLVENT: CDCl3  
Experiment = zg30  
Pulse length = 14.000 usec  
Relaxation delay = 1.000 sec  
NA = 8  
Solvent = CDCl3  
PTS1d = 32768  
F1 = 300.130005 MHz  
F2 = 1.000000 MHz  
SW1 = 6188.12 Hz

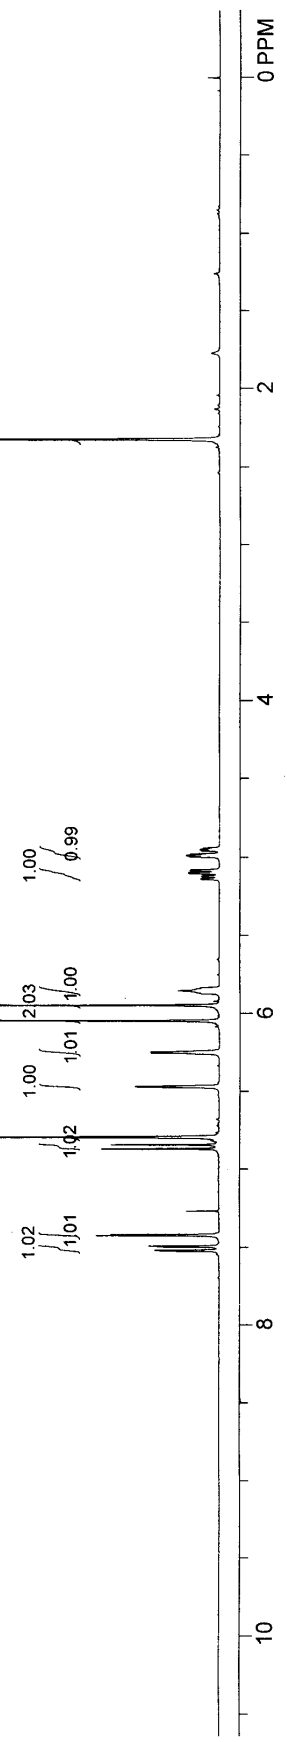

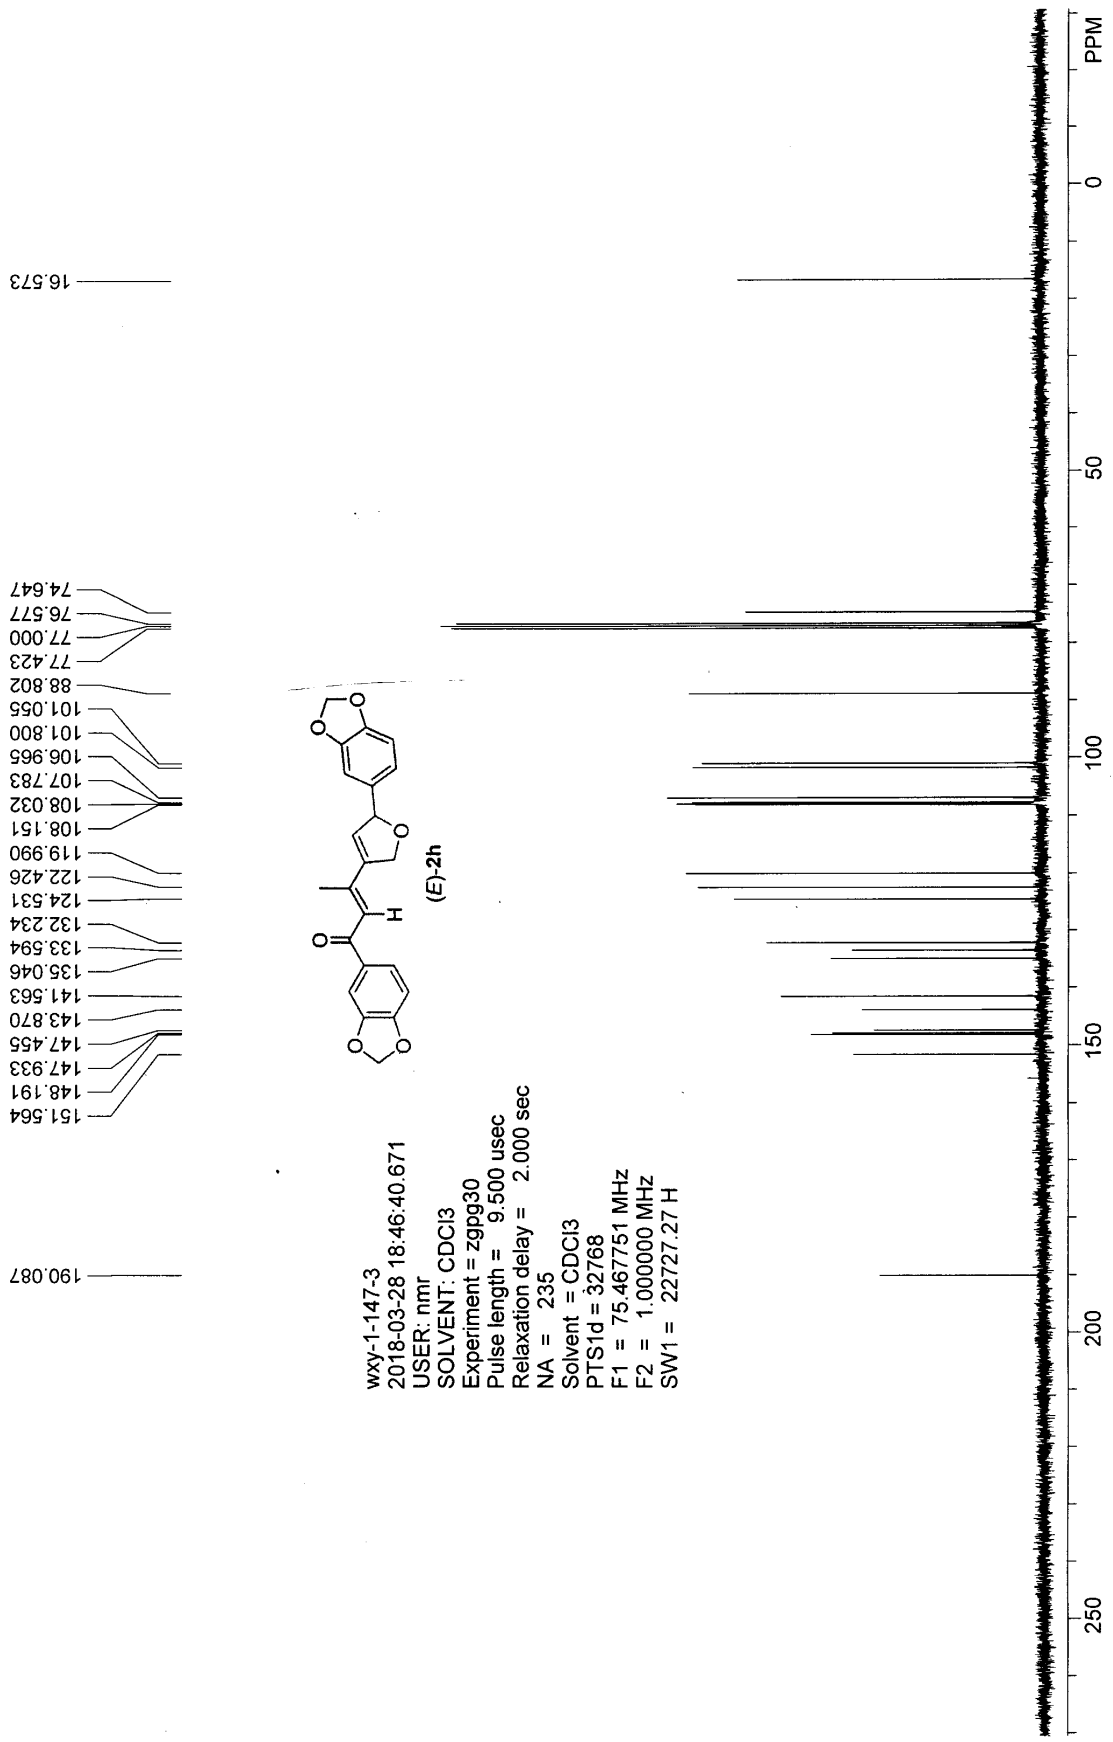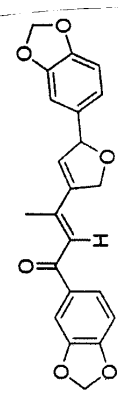

wxy-1-147-3  
 2018-03-28 18:46:40.671  
 USER: nmr  
 SOLVENT: CDCl3  
 Experiment = zgpg30  
 Pulse length = 9.500 usec  
 Relaxation delay = 2.000 sec  
 NA = 235  
 Solvent = CDCl3  
 PTS1d = 32768  
 F1 = 75.467751 MHz  
 F2 = 1.000000 MHz  
 SW1 = 22727.27 H

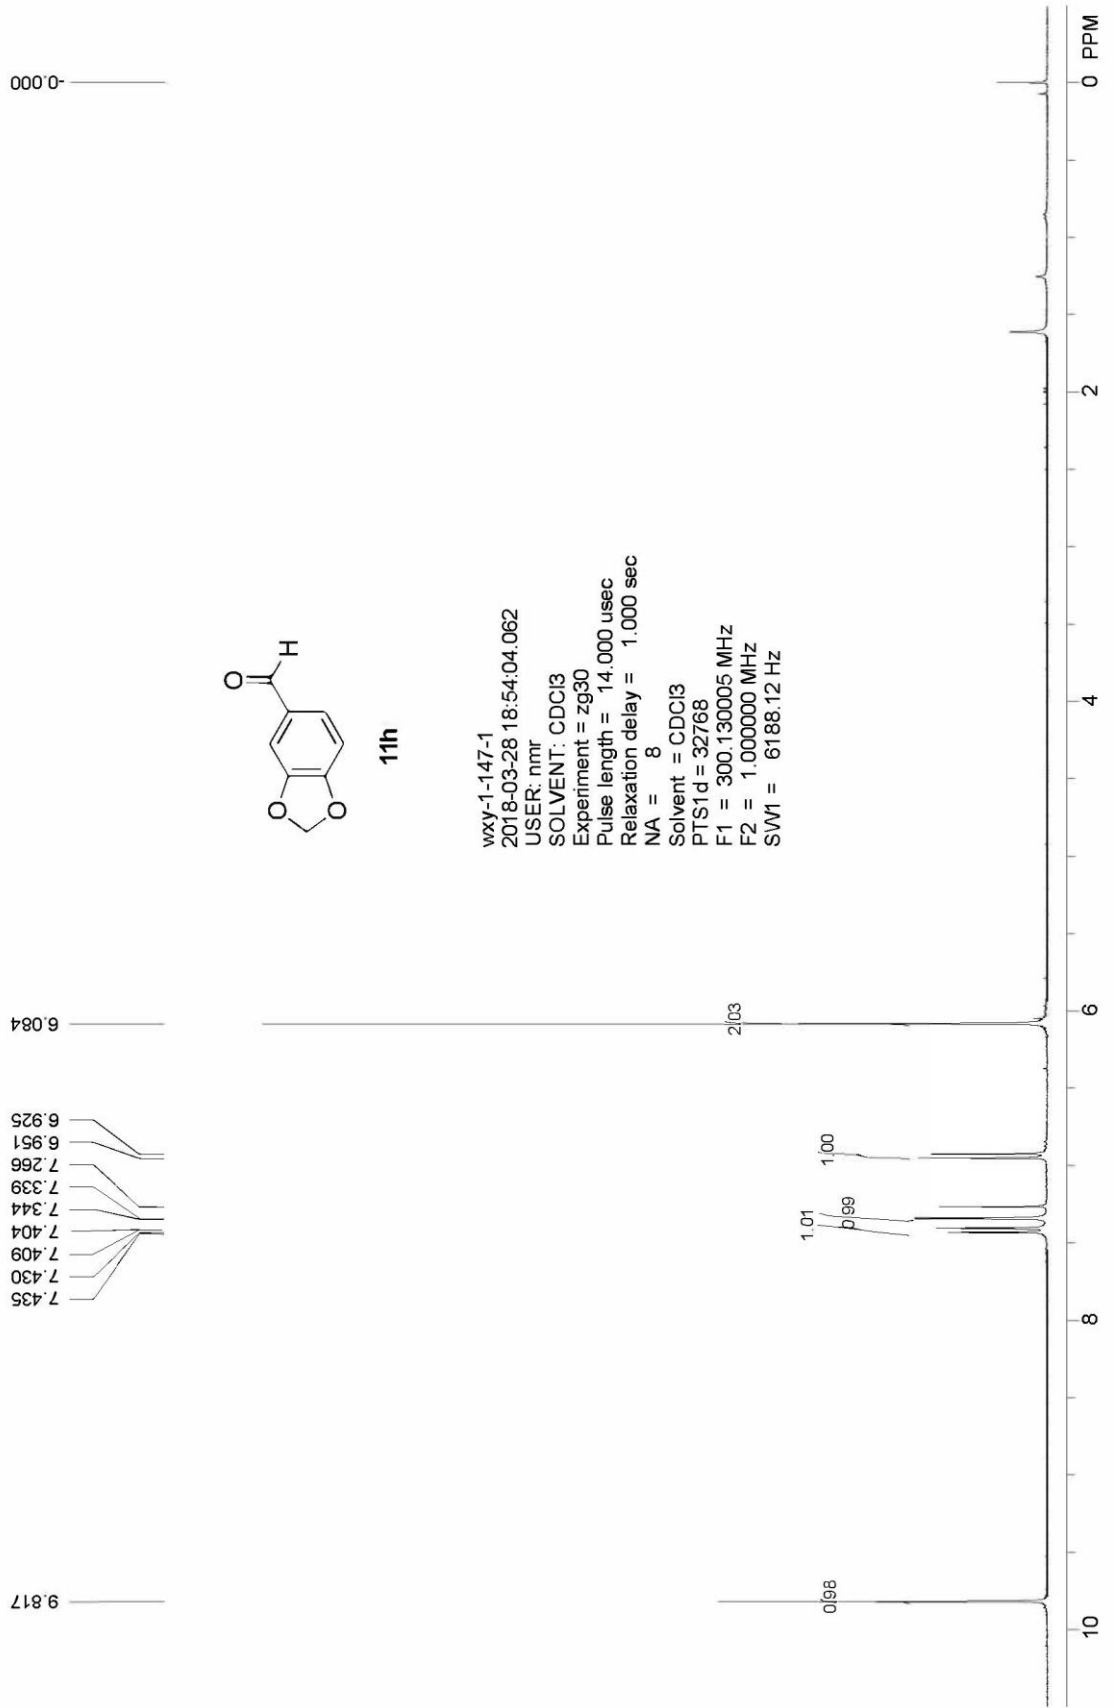



8.503  
8.500  
8.475  
8.472  
8.096  
8.068  
7.972  
7.945  
7.889  
7.869  
7.863  
7.815  
7.784  
7.781  
7.760  
7.756  
7.604  
7.570  
7.515  
7.494  
7.467  
7.443  
7.218  
6.706  
6.602  
6.596  
6.590  
6.584  
6.443  
5.176  
5.170  
5.158  
5.152  
5.138  
5.131  
5.120  
5.114  
5.081  
5.074  
5.069  
5.062  
5.043  
5.036  
5.030  
5.023  
2.410  
2.407

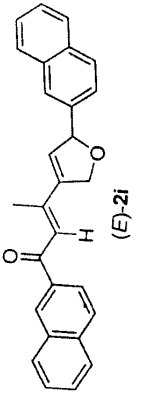

wxy-2-073  
2018-05-25 19:43:19.468  
USER: nmr  
SOLVENT: CDCl3  
Experiment = zg30  
Pulse length = 14.000 usec  
Relaxation delay = 1.000 sec  
NA = 8  
Solvent = CDCl3  
PTS1d = 32768  
F1 = 300.130005 MHz  
F2 = 1.000000 MHz  
SW1 = 6188.12 Hz

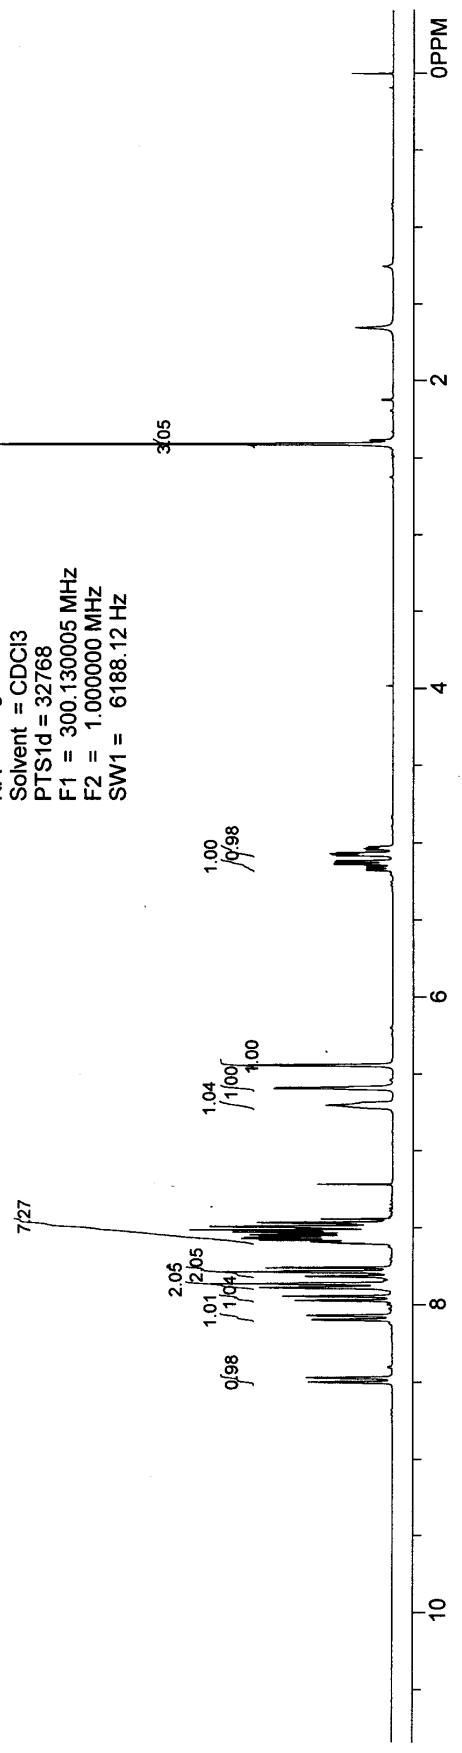

0.000

6.800  
6.720

purity (97%) is determined by mesitylene (12.5  $\mu$ L, 10.8 mg, 0.27 mmol)  
as the internal standard in 105.8 mg of sample.

wxy-2-073-purity  
2018-05-25 21:31:22.609  
USER: nmr  
SOLVENT: CDCl3  
Experiment = zg30  
Pulse length = 14.000 usec  
Relaxation delay = 1.000 sec  
NA = 8  
Solvent = CDCl3  
PTS1d = 32768  
F1 = 300.130005 MHz  
F2 = 1.000000 MHz  
SW1 = 6188.12 Hz

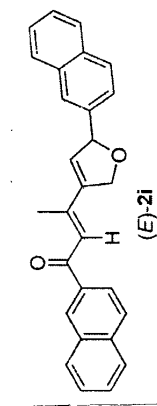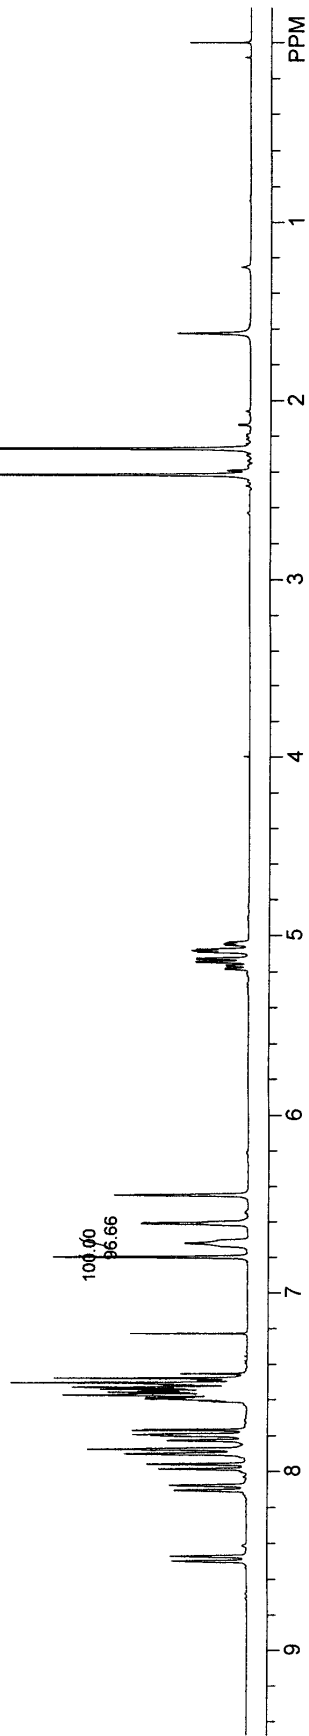

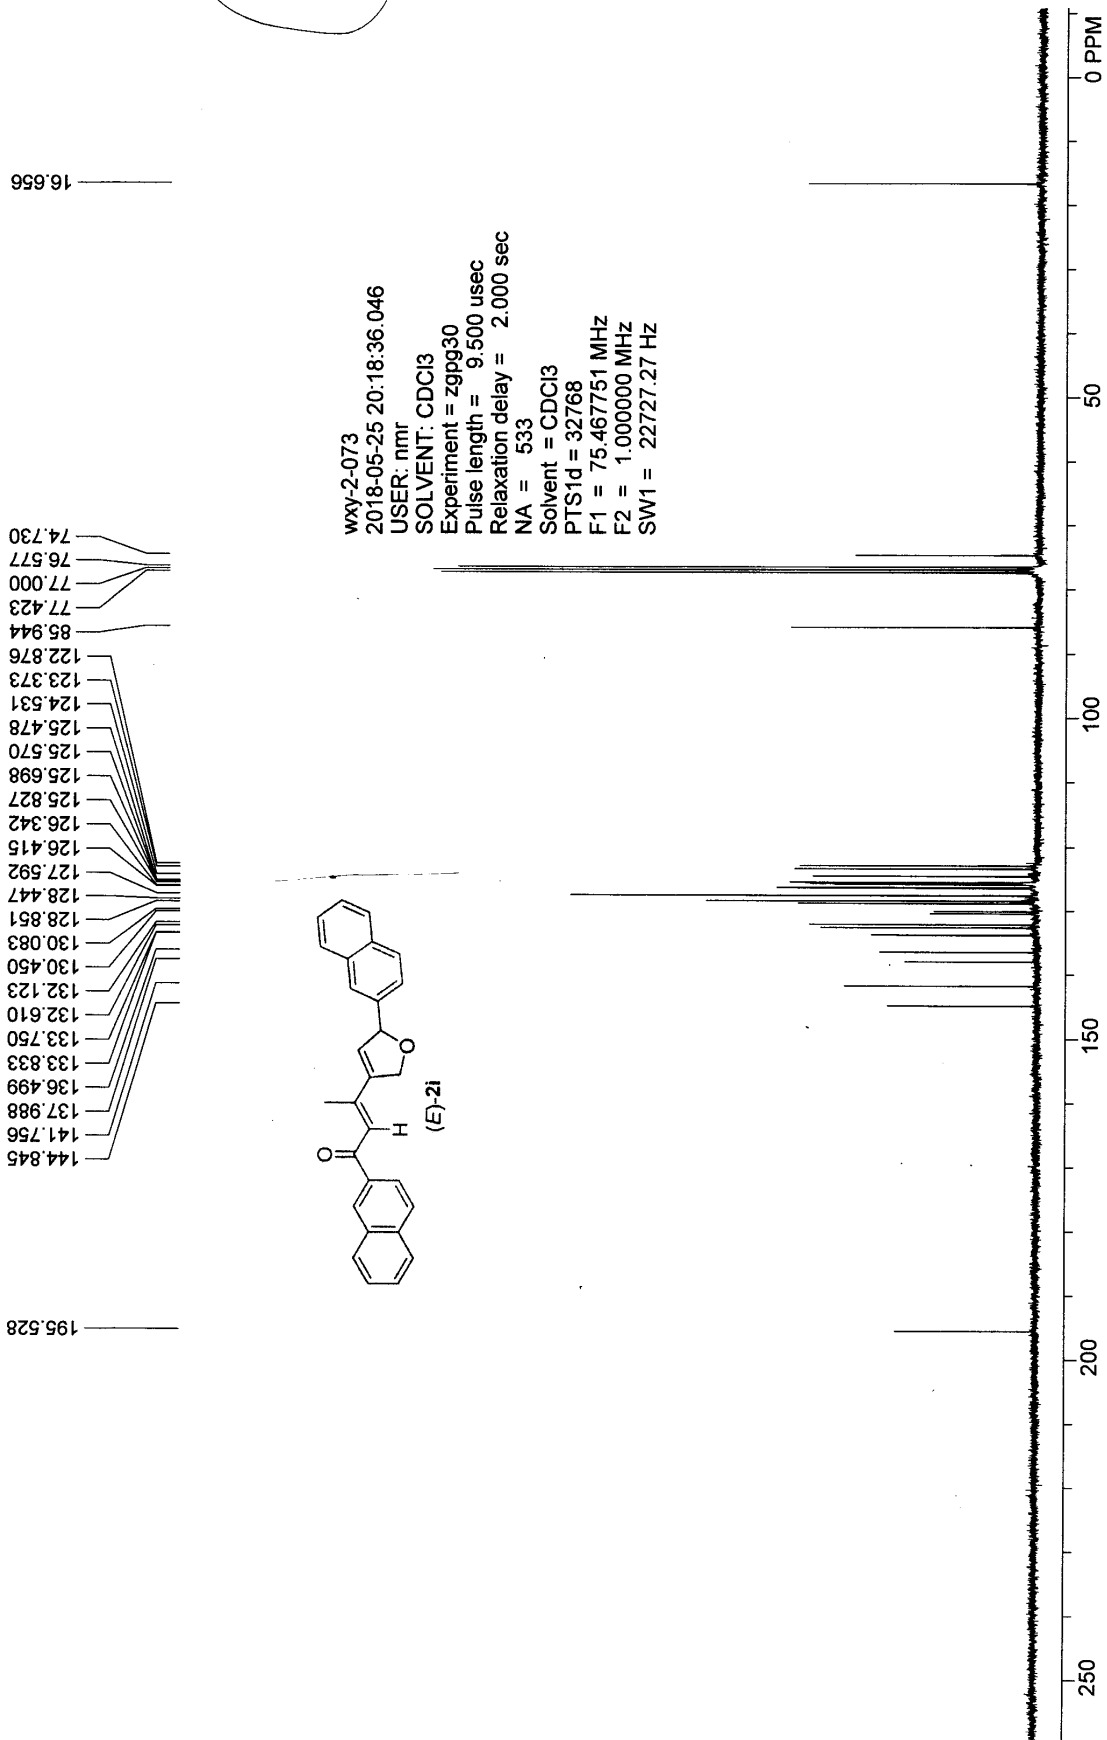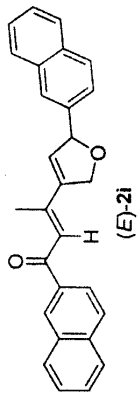

-0.000

7.596  
7.592  
7.414  
7.411  
7.280  
7.210  
7.198  
6.562  
6.556  
6.550  
6.543  
6.535  
6.368  
6.357  
6.350  
6.341  
6.335  
6.317  
6.306  
5.975  
5.966  
5.958  
5.949  
5.941  
5.112  
5.105  
5.094  
5.087  
5.074  
5.067  
5.056  
5.050  
4.969  
4.962  
4.958  
4.951  
4.931  
4.924  
4.921  
4.914  
2.494  
2.491

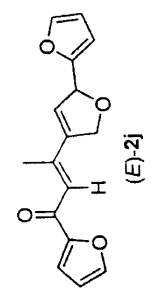

wxy-2-020  
2018-05-12 20:29:10.765  
USER: nmr  
SOLVENT: CDCl3  
Experiment = zg30  
Pulse length = 14.000 usec  
Relaxation delay = 1.000 sec  
NA = 8  
Solvent = CDCl3  
PTS1d = 32768  
F1 = 300.130005 MHz  
F2 = 1.000000 MHz  
SW1 = 6188.12 Hz

3|03  
2|03  
1|01|001|00  
1|00|00  
1|00|00

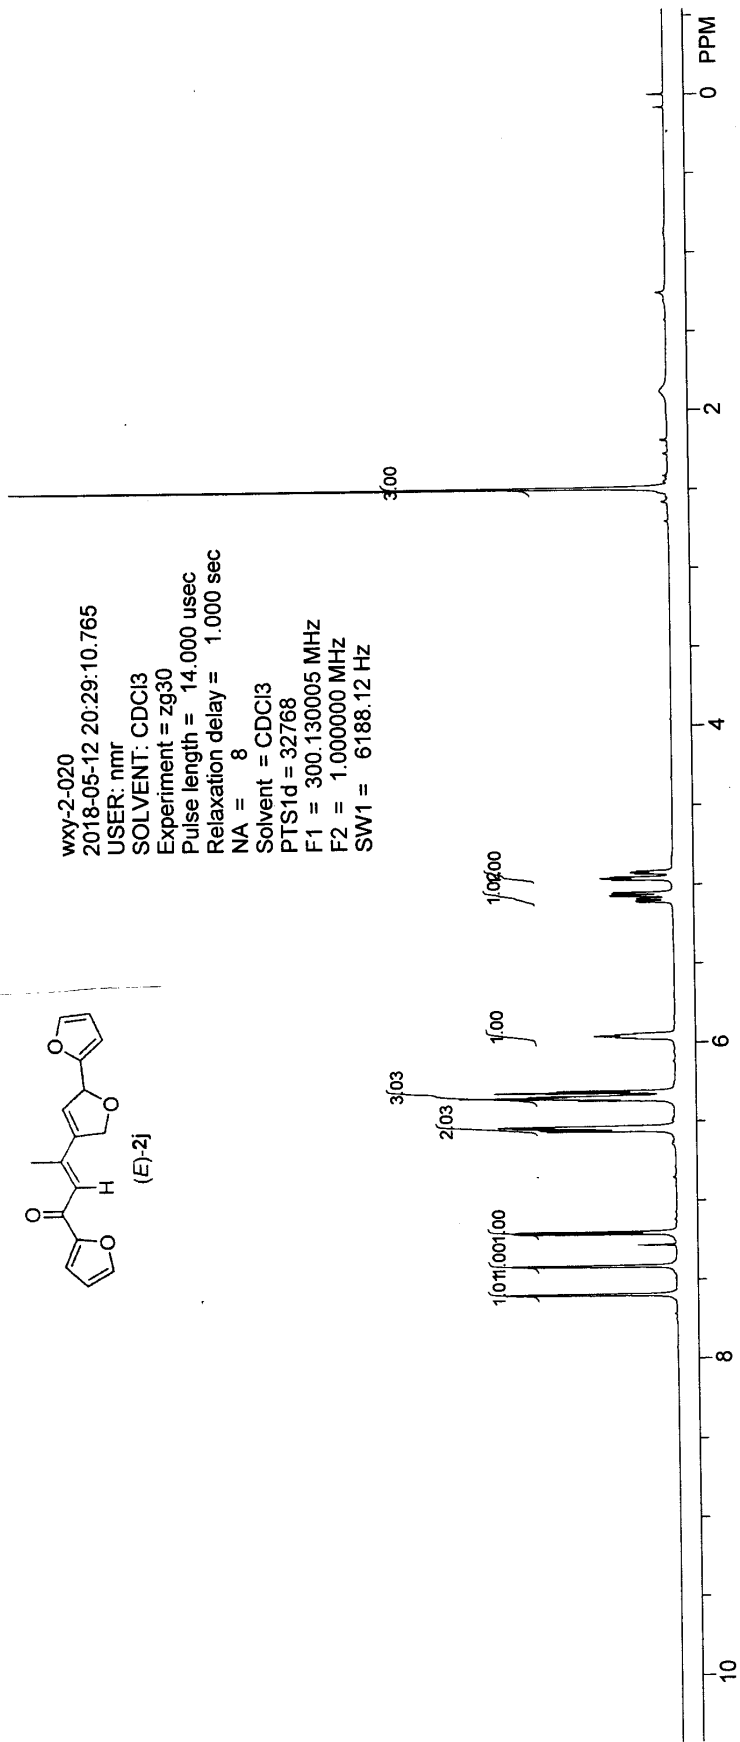

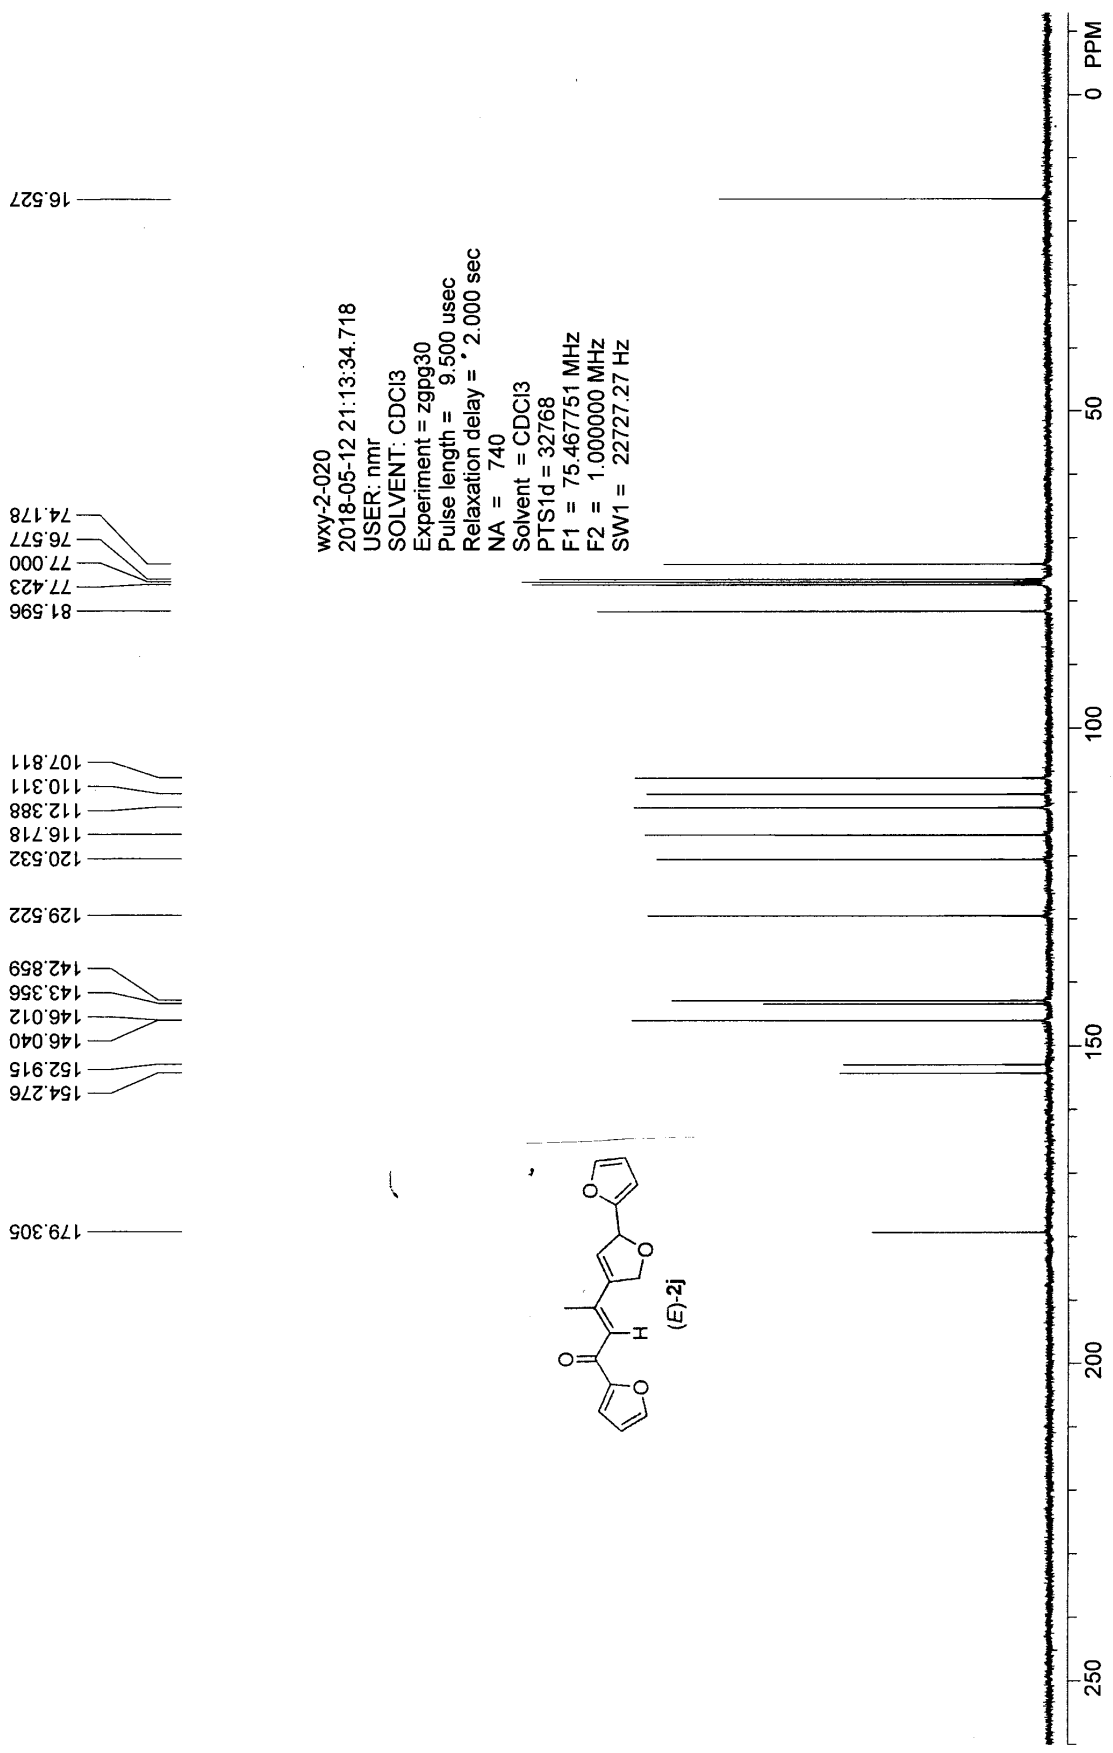

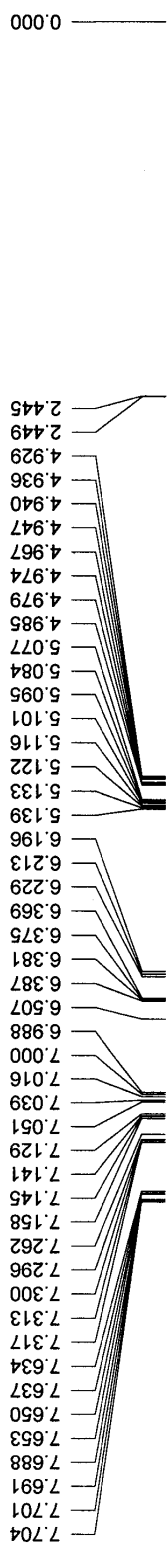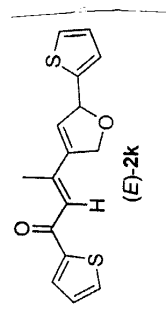

wxy-1-191  
2018-04-29 13:51:36.234  
USER: nmr  
SOLVENT: CDCl3  
Experiment = zg30  
Pulse length = 14.000 usec  
Relaxation delay = 1.000 sec  
NA = 8  
Solvent = CDCl3  
PTS1d = 32768  
F1 = 300.130005 MHz  
F2 = 1.000000 MHz  
SW1 = 6188.12 Hz

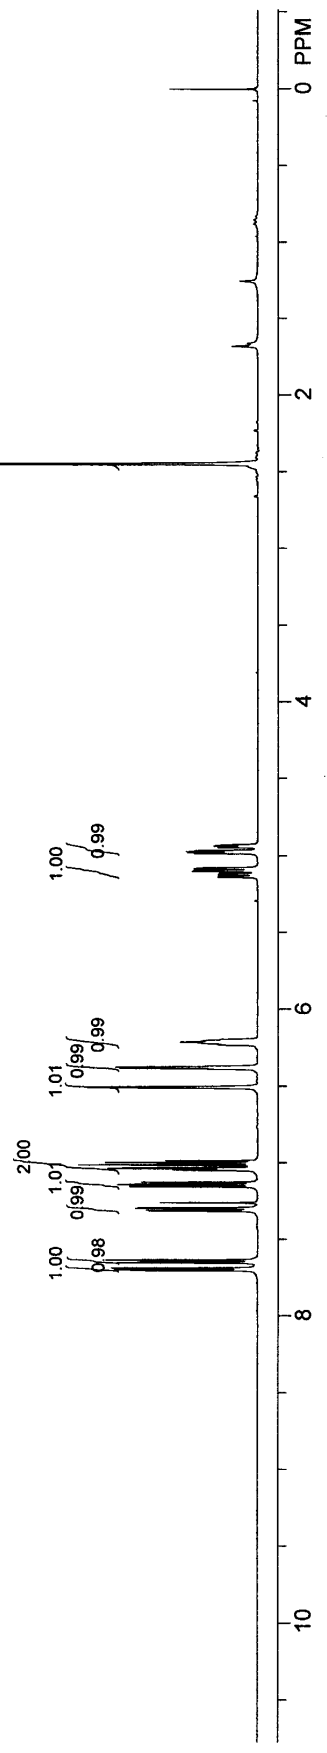

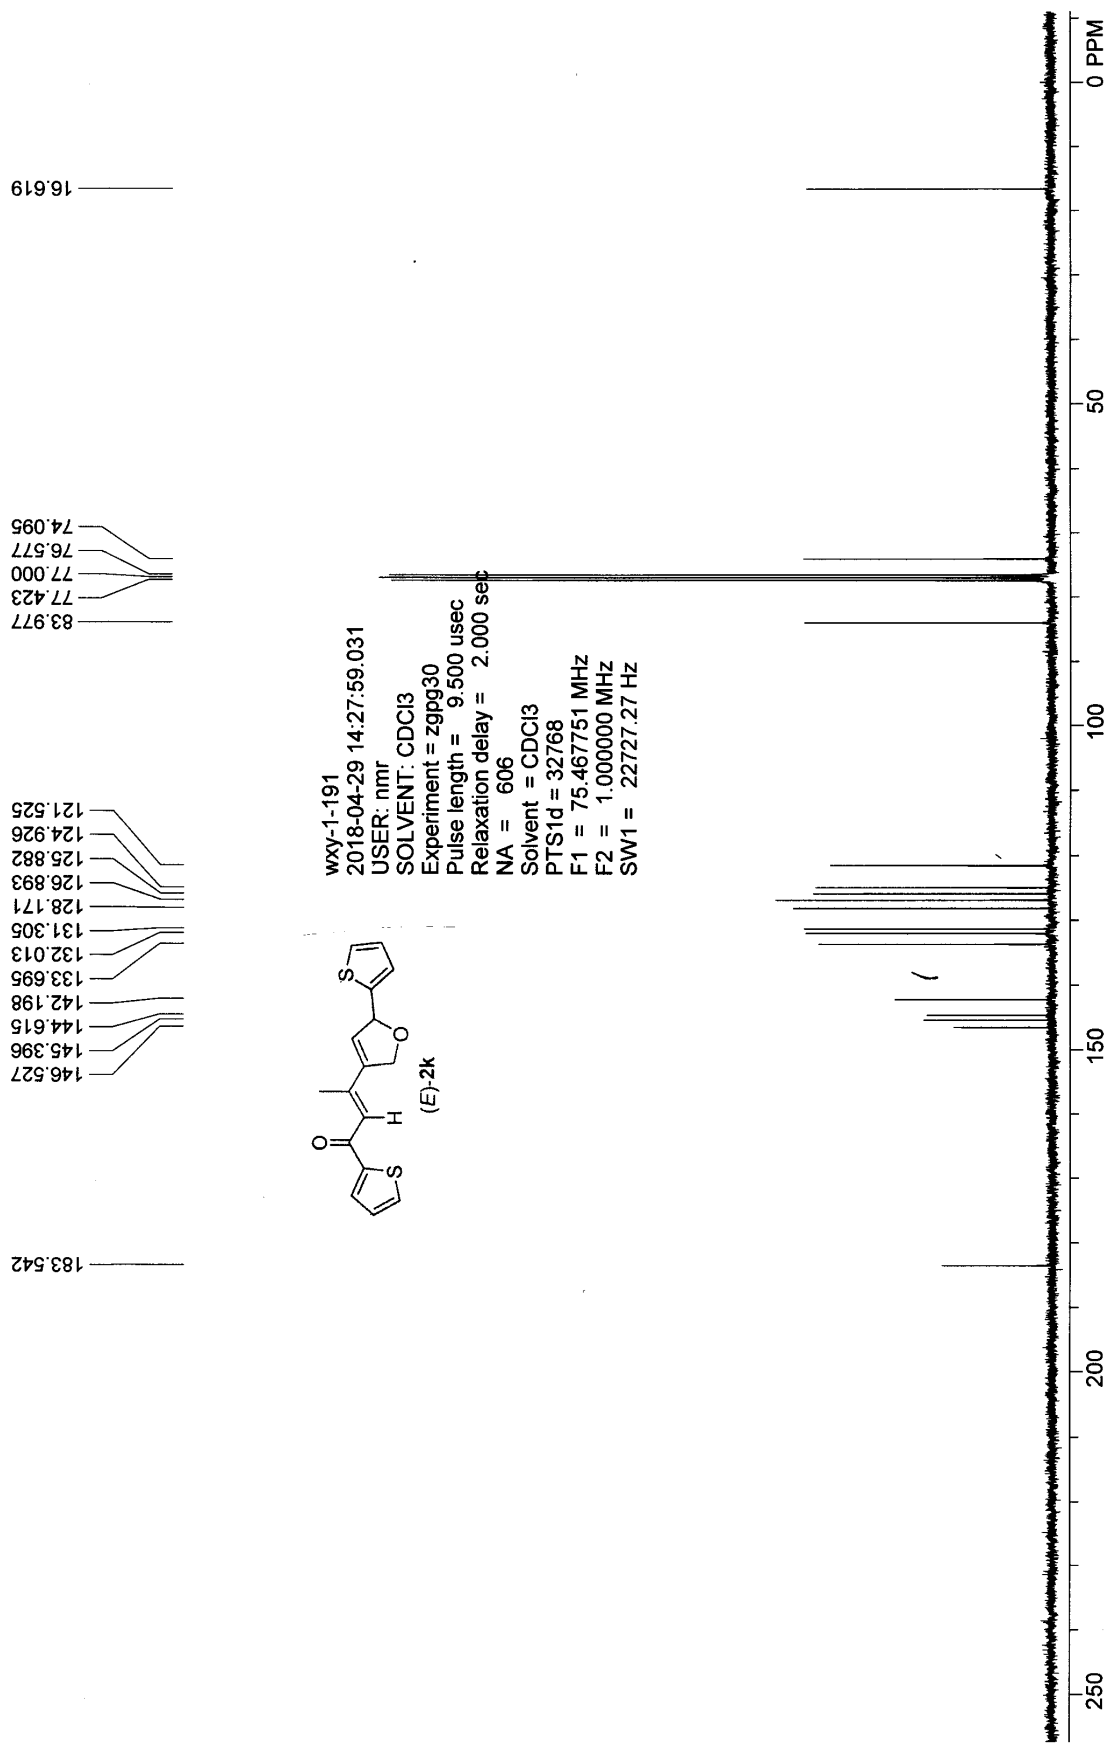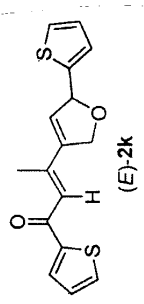

## checkCIF/PLATON report

Structure factors have been supplied for datablock(s) 180508\_wxy\_1\_191

THIS REPORT IS FOR GUIDANCE ONLY. IF USED AS PART OF A REVIEW PROCEDURE FOR PUBLICATION, IT SHOULD NOT REPLACE THE EXPERTISE OF AN EXPERIENCED CRYSTALLOGRAPHIC REFEREE.

No syntax errors found.    CIF dictionary    Interpreting this report

### Datablock: 180508\_wxy\_1\_191

---

|                 |                |                    |                |
|-----------------|----------------|--------------------|----------------|
| Bond precision: | C-C = 0.0043 A | Wavelength=0.71073 |                |
| Cell:           | a=8.1839 (7)   | b=17.0403 (12)     | c=21.7793 (14) |
|                 | alpha=90       | beta=90            | gamma=90       |
| Temperature:    | 293 K          |                    |                |
|                 | Calculated     | Reported           |                |
| Volume          | 3037.3(4)      | 3037.2(4)          |                |
| Space group     | P b c a        | P b c a            |                |
| Hall group      | -P 2ac 2ab     | -P 2ac 2ab         |                |
| Moiety formula  | C16 H14 O2 S2  | C16 H14 O2 S2      |                |
| Sum formula     | C16 H14 O2 S2  | C16 H14 O2 S2      |                |
| Mr              | 302.39         | 302.39             |                |
| Dx,g cm-3       | 1.323          | 1.323              |                |
| Z               | 8              | 8                  |                |
| Mu (mm-1)       | 0.348          | 0.348              |                |
| F000            | 1264.0         | 1264.0             |                |
| F000'           | 1266.47        |                    |                |
| h,k,lmax        | 9,20,26        | 9,20,26            |                |
| Nref            | 2781           | 2777               |                |
| Tmin,Tmax       | 0.843,0.870    | 0.865,1.000        |                |
| Tmin'           | 0.843          |                    |                |

Correction method= # Reported T Limits: Tmin=0.865 Tmax=1.000  
AbsCorr = MULTI-SCAN

Data completeness= 0.999                      Theta(max)= 25.349

R(reflections)= 0.0502( 1994)              wR2(reflections)= 0.1420( 2777)

S = 1.035                      Npar= 181

---

The following ALERTS were generated. Each ALERT has the format  
**test-name\_ALERT\_alert-type\_alert-level.**  
Click on the hyperlinks for more details of the test.



---

● **Alert level C**  
PLAT340\_ALERT\_3\_C Low Bond Precision on C-C Bonds ..... 0.00427 Ang.  
PLAT978\_ALERT\_2\_C Number C-C Bonds with Positive Residual Density. 0 Info

---

● **Alert level G**  
PLAT199\_ALERT\_1\_G Reported \_cell\_measurement\_temperature ..... (K) 293 Check  
PLAT200\_ALERT\_1\_G Reported \_diffn\_ambient\_temperature ..... (K) 293 Check  
PLAT380\_ALERT\_4\_G Incorrectly? Oriented X(sp<sup>2</sup>)-Methyl Moiety ..... C16 Check  
PLAT398\_ALERT\_2\_G Deviating C-O-C Angle From 120 for O2 109.5 Degree  
PLAT793\_ALERT\_4\_G Model has Chirality at C10 (Centro SPGR) S Verify  
PLAT910\_ALERT\_3\_G Missing # of FCF Reflection(s) Below Theta(Min). 4 Note

---

0 **ALERT level A** = Most likely a serious problem - resolve or explain  
0 **ALERT level B** = A potentially serious problem, consider carefully  
2 **ALERT level C** = Check. Ensure it is not caused by an omission or oversight  
6 **ALERT level G** = General information/check it is not something unexpected

2 ALERT type 1 CIF construction/syntax error, inconsistent or missing data  
2 ALERT type 2 Indicator that the structure model may be wrong or deficient  
2 ALERT type 3 Indicator that the structure quality may be low  
2 ALERT type 4 Improvement, methodology, query or suggestion  
0 ALERT type 5 Informative message, check

---

It is advisable to attempt to resolve as many as possible of the alerts in all categories. Often the minor alerts point to easily fixed oversights, errors and omissions in your CIF or refinement strategy, so attention to these fine details can be worthwhile. In order to resolve some of the more serious problems it may be necessary to carry out additional measurements or structure refinements. However, the purpose of your study may justify the reported deviations and the more serious of these should normally be commented upon in the discussion or experimental section of a paper or in the "special\_details" fields of the CIF. checkCIF was carefully designed to identify outliers and unusual parameters, but every test has its limitations and alerts that are not important in a particular case may appear. Conversely, the absence of alerts does not guarantee there are no aspects of the results needing attention. It is up to the individual to critically assess their own results and, if necessary, seek expert advice.

#### **Publication of your CIF in IUCr journals**

A basic structural check has been run on your CIF. These basic checks will be run on all CIFs submitted for publication in IUCr journals (*Acta Crystallographica*, *Journal of Applied Crystallography*, *Journal of Synchrotron Radiation*); however, if you intend to submit to *Acta Crystallographica Section C* or *E* or *IUCrData*, you should make sure that full publication checks are run on the final version of your CIF prior to submission.

#### **Publication of your CIF in other journals**

Please refer to the *Notes for Authors* of the relevant journal for any special instructions relating to CIF submission.

---

**PLATON version of 23/04/2018; check.def file version of 23/04/2018**

Datablock 180508\_wxy\_1\_191 - ellipsoid plot

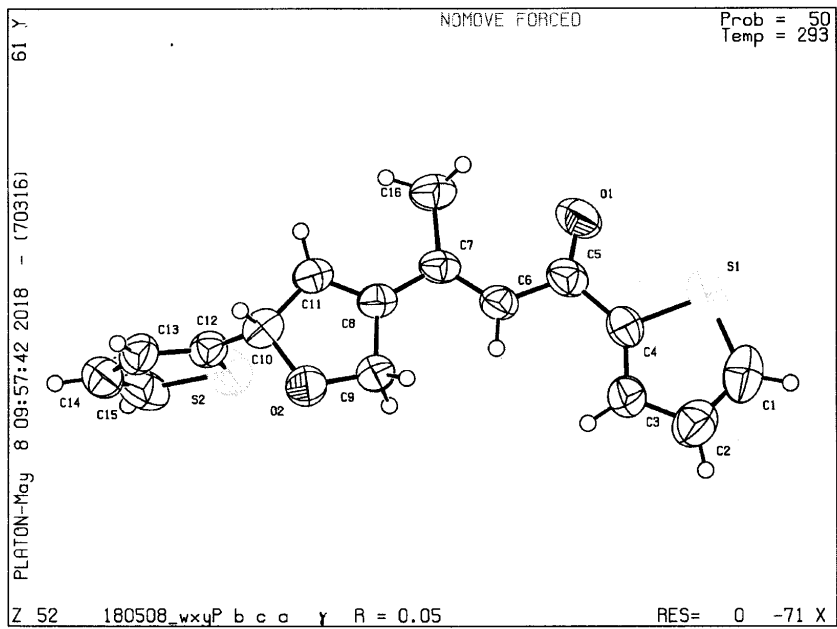

7.609  
7.575  
7.563  
7.555  
7.544  
7.406  
7.400  
7.387  
7.375  
7.365  
7.329  
7.306  
7.281  
7.256  
7.233  
7.209  
6.876  
6.822  
6.663  
6.610  
6.249  
6.243  
6.216  
6.192  
6.163  
6.139  
6.107  
5.539  
5.040  
5.034  
5.023  
5.017  
5.002  
4.996  
4.985  
4.979  
4.926  
4.919  
4.914  
4.908  
4.888  
4.881  
4.877  
4.870  
2.407  
2.404

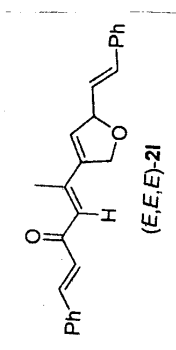

wxy-3-024  
2018-09-14 19:46:33.765  
USER: nmf  
SOLVENT: CDCI3  
Experiment = zg30  
Pulse length = 14.000 usec  
Relaxation delay = 1.000 sec  
NA = 8  
Solvent = CDCI3  
PTSD = 32768  
F1 = 300.130005 MHz  
F2 = 1.000000 MHz  
SW1 = 6188.12 Hz

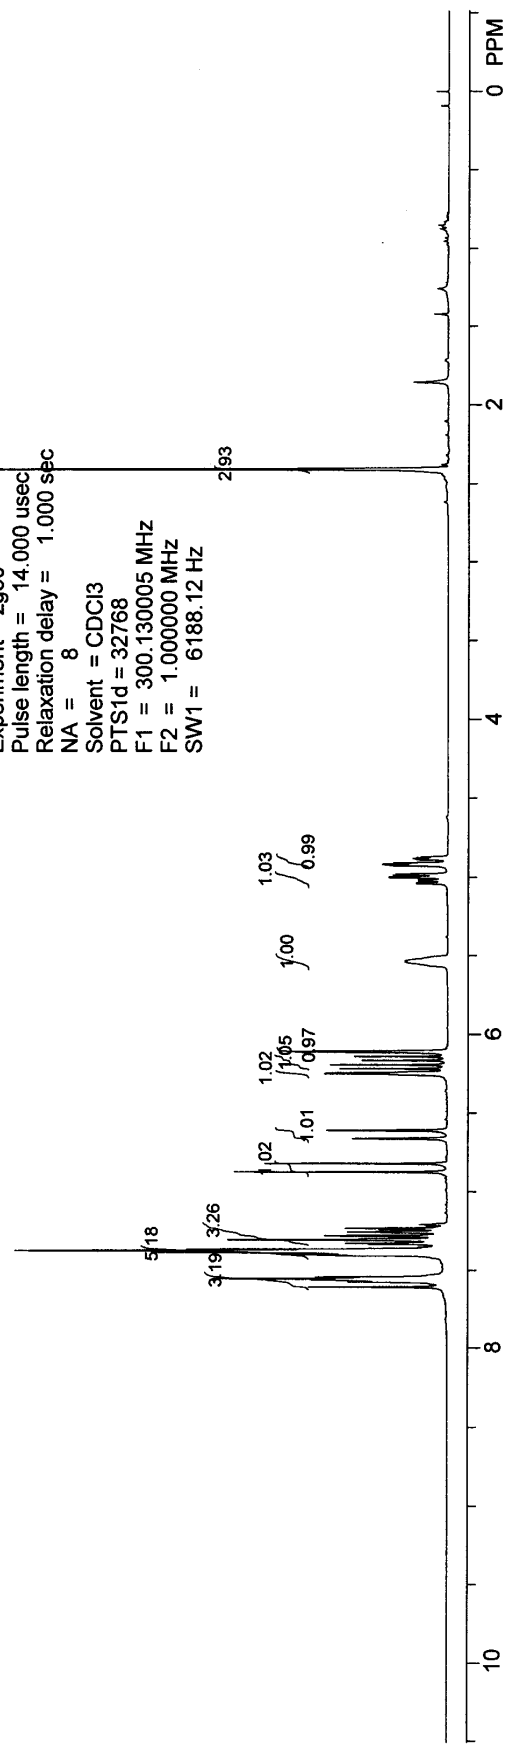

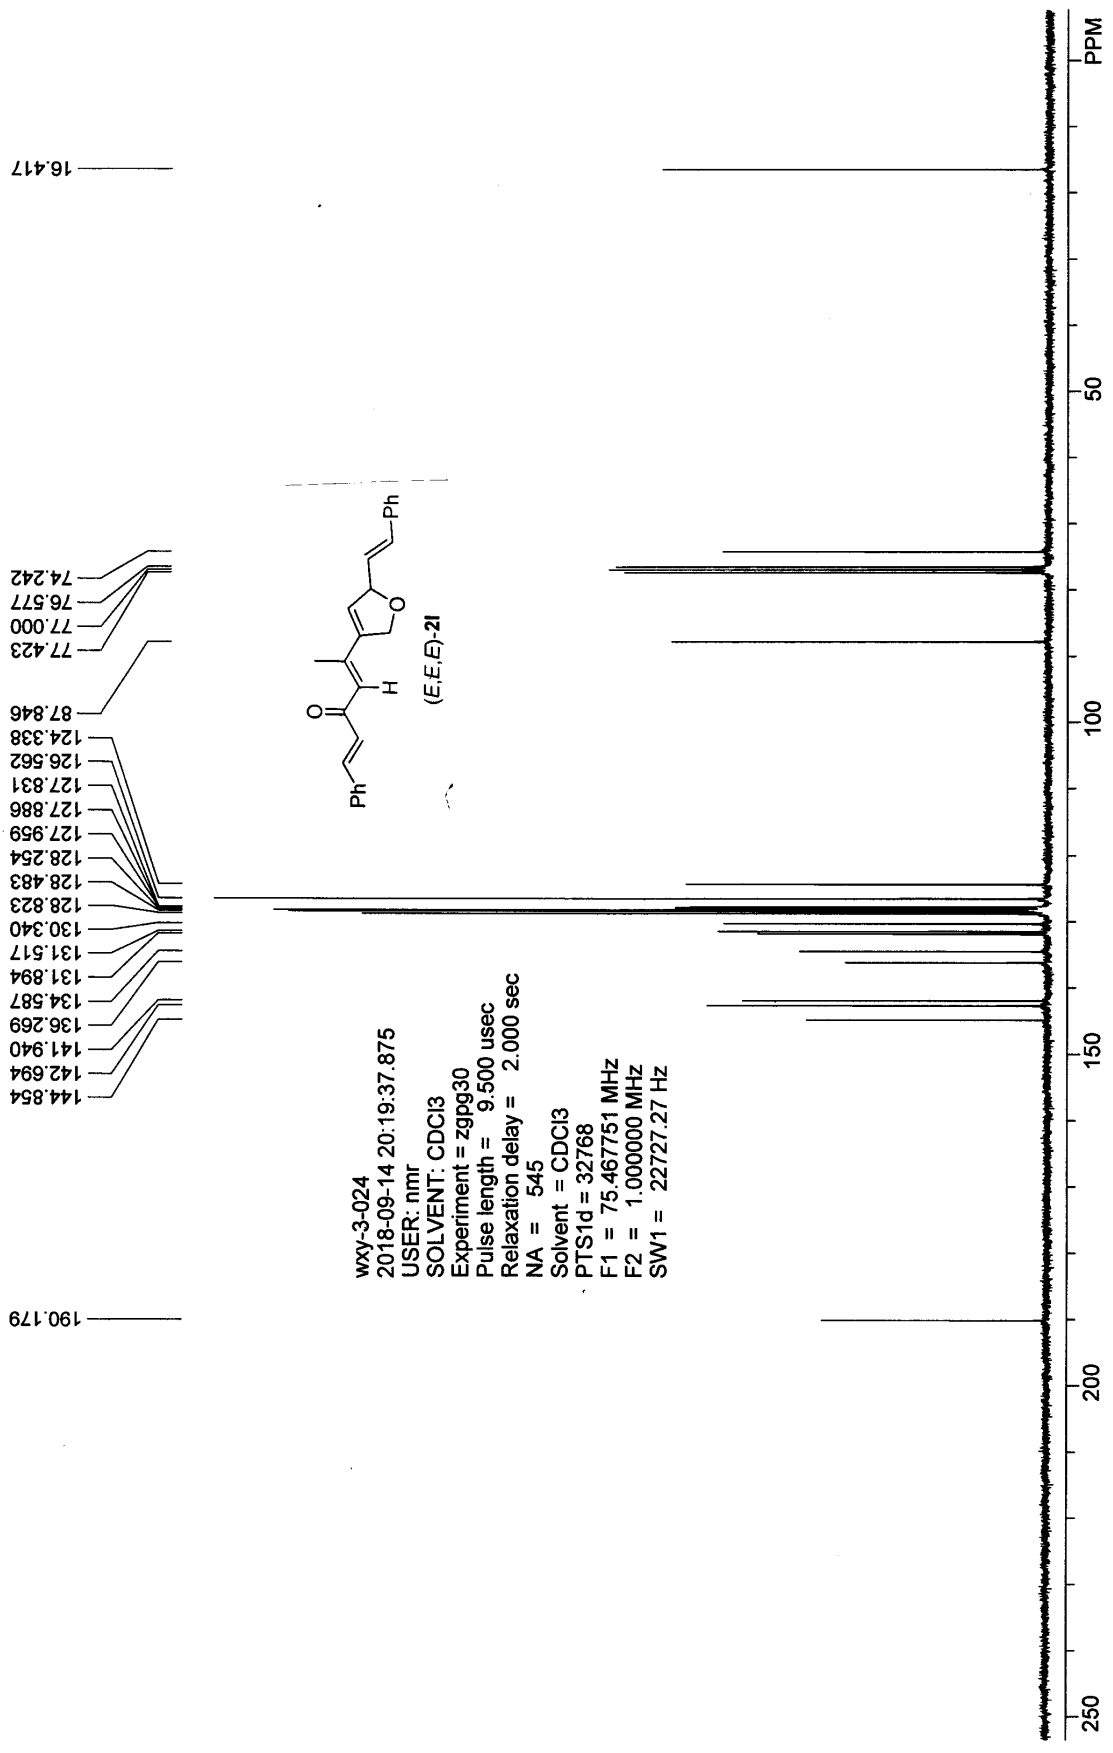



hx-16-8

2018-01-30 20:05:41.968

USER: nmr

SOLVENT: CDCl3

Experiment = z9pg30

Pulse length = 9.500 usec

Relaxation delay = 2.000 sec

NA = 105

Solvent = CDCl3

PTS1d = 32768

F1 = 75.467751 MHz

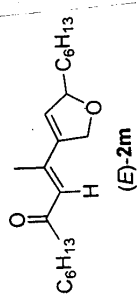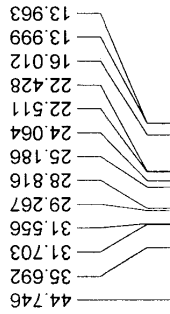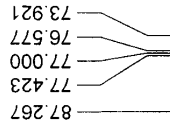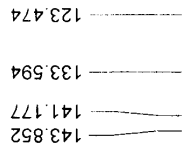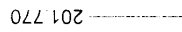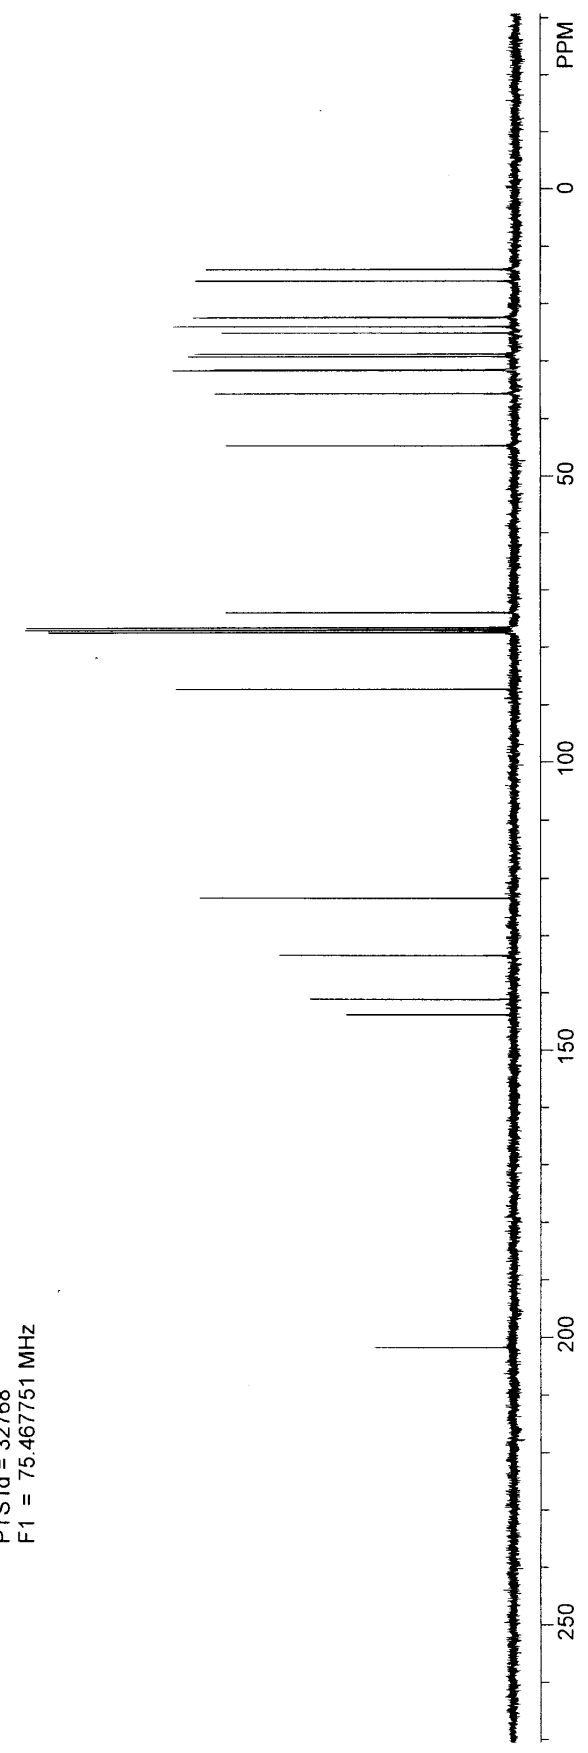

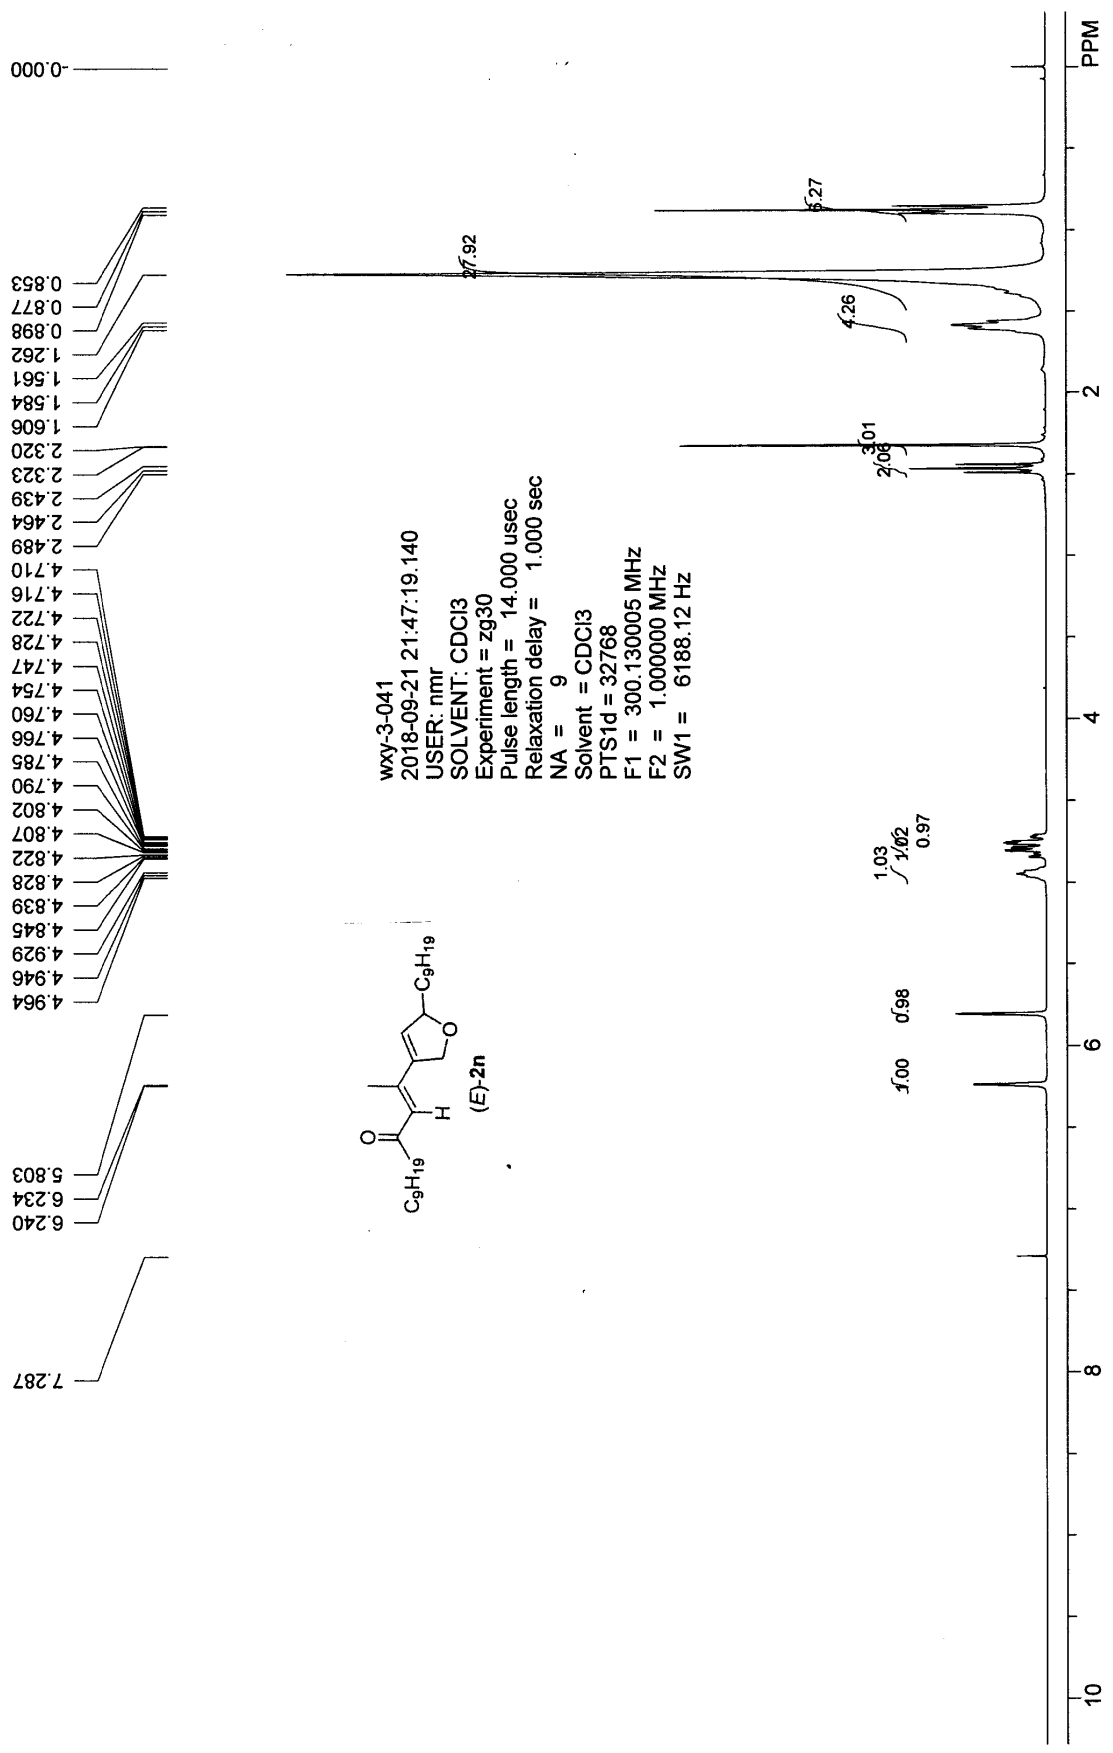

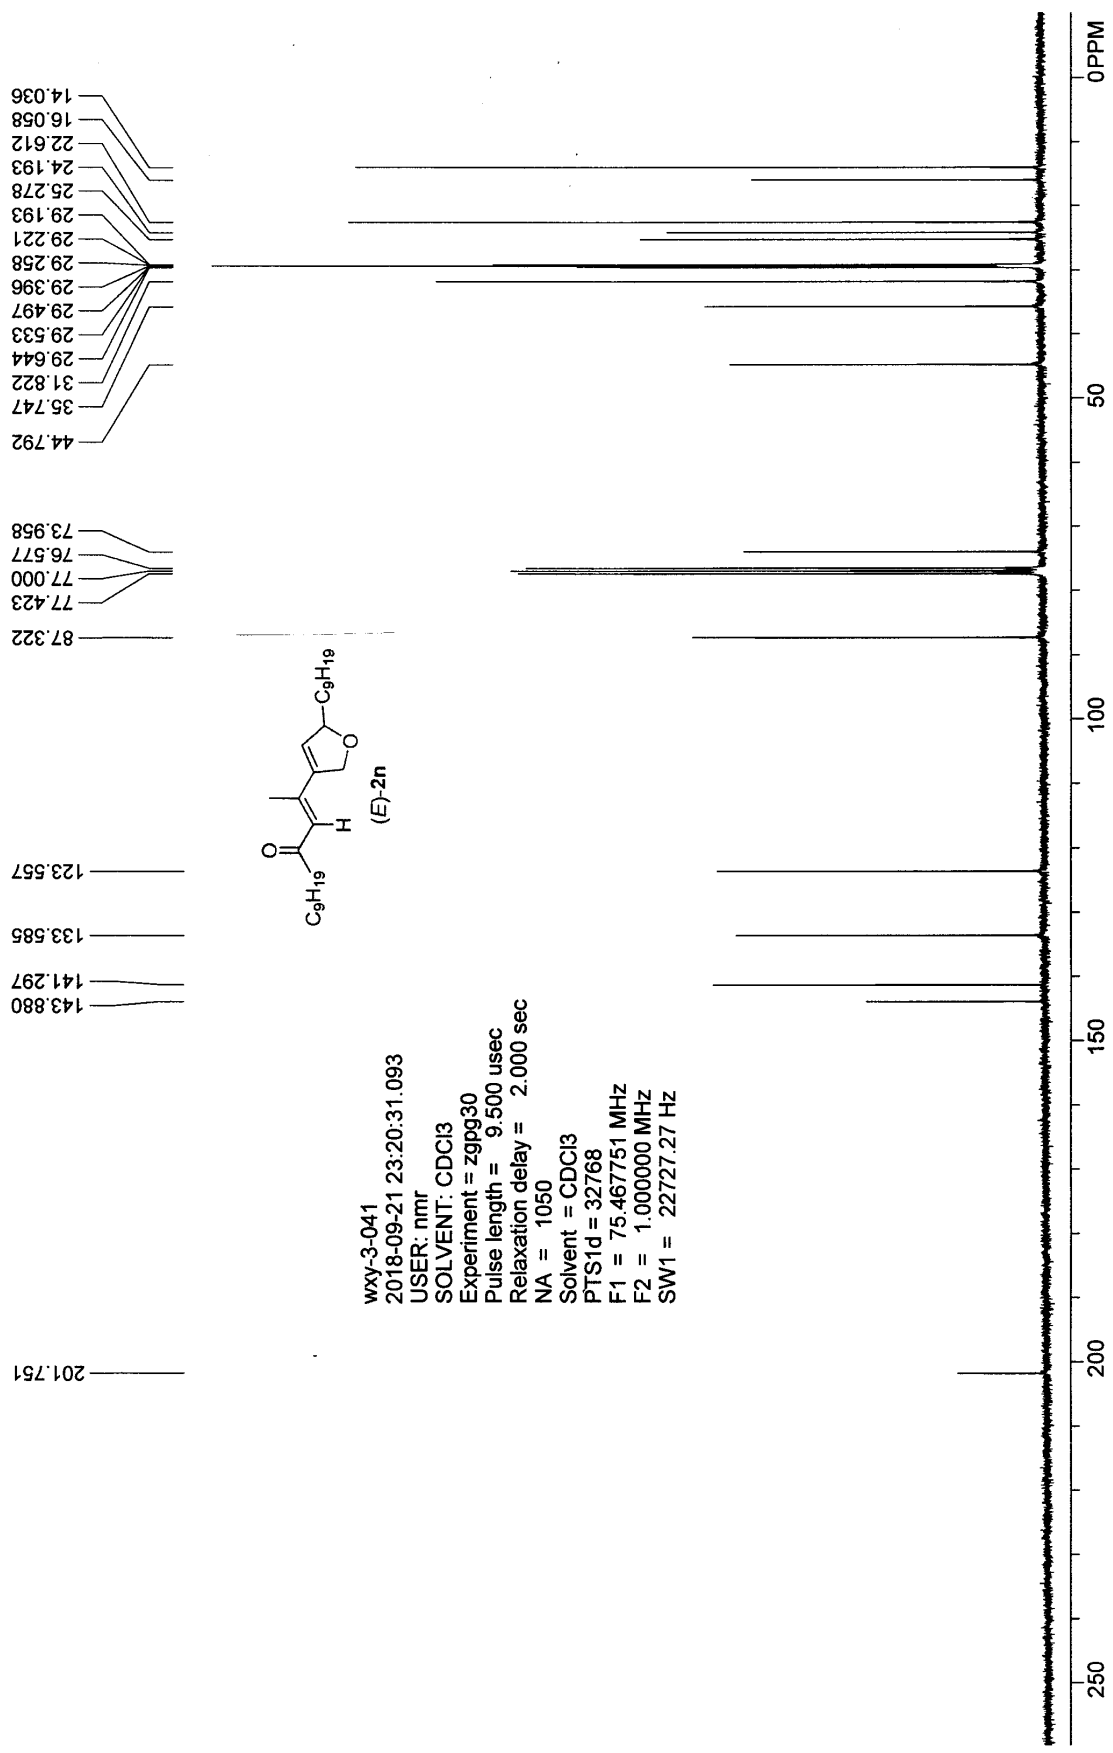

44.792  
35.747  
31.822  
29.644  
29.533  
29.497  
29.396  
29.258  
29.221  
29.193  
25.278  
24.193  
22.612  
16.058  
14.036

87.322  
77.423  
77.000  
76.577  
73.958

143.880  
141.297  
133.585  
123.557

201.751

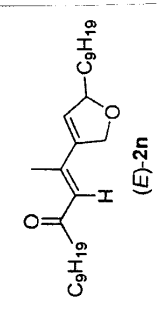

wxy-3-041  
 2018-09-21 23:20:31.093  
 USER: nmr  
 SOLVENT: CDCl3  
 Experiment = zgpg30  
 Pulse length = 9.500 usec  
 Relaxation delay = 2.000 sec  
 NA = 1050  
 Solvent = CDCl3  
 PTS1d = 32768  
 F1 = 75.467751 MHz  
 F2 = 1.000000 MHz  
 SW1 = 22727.27 Hz





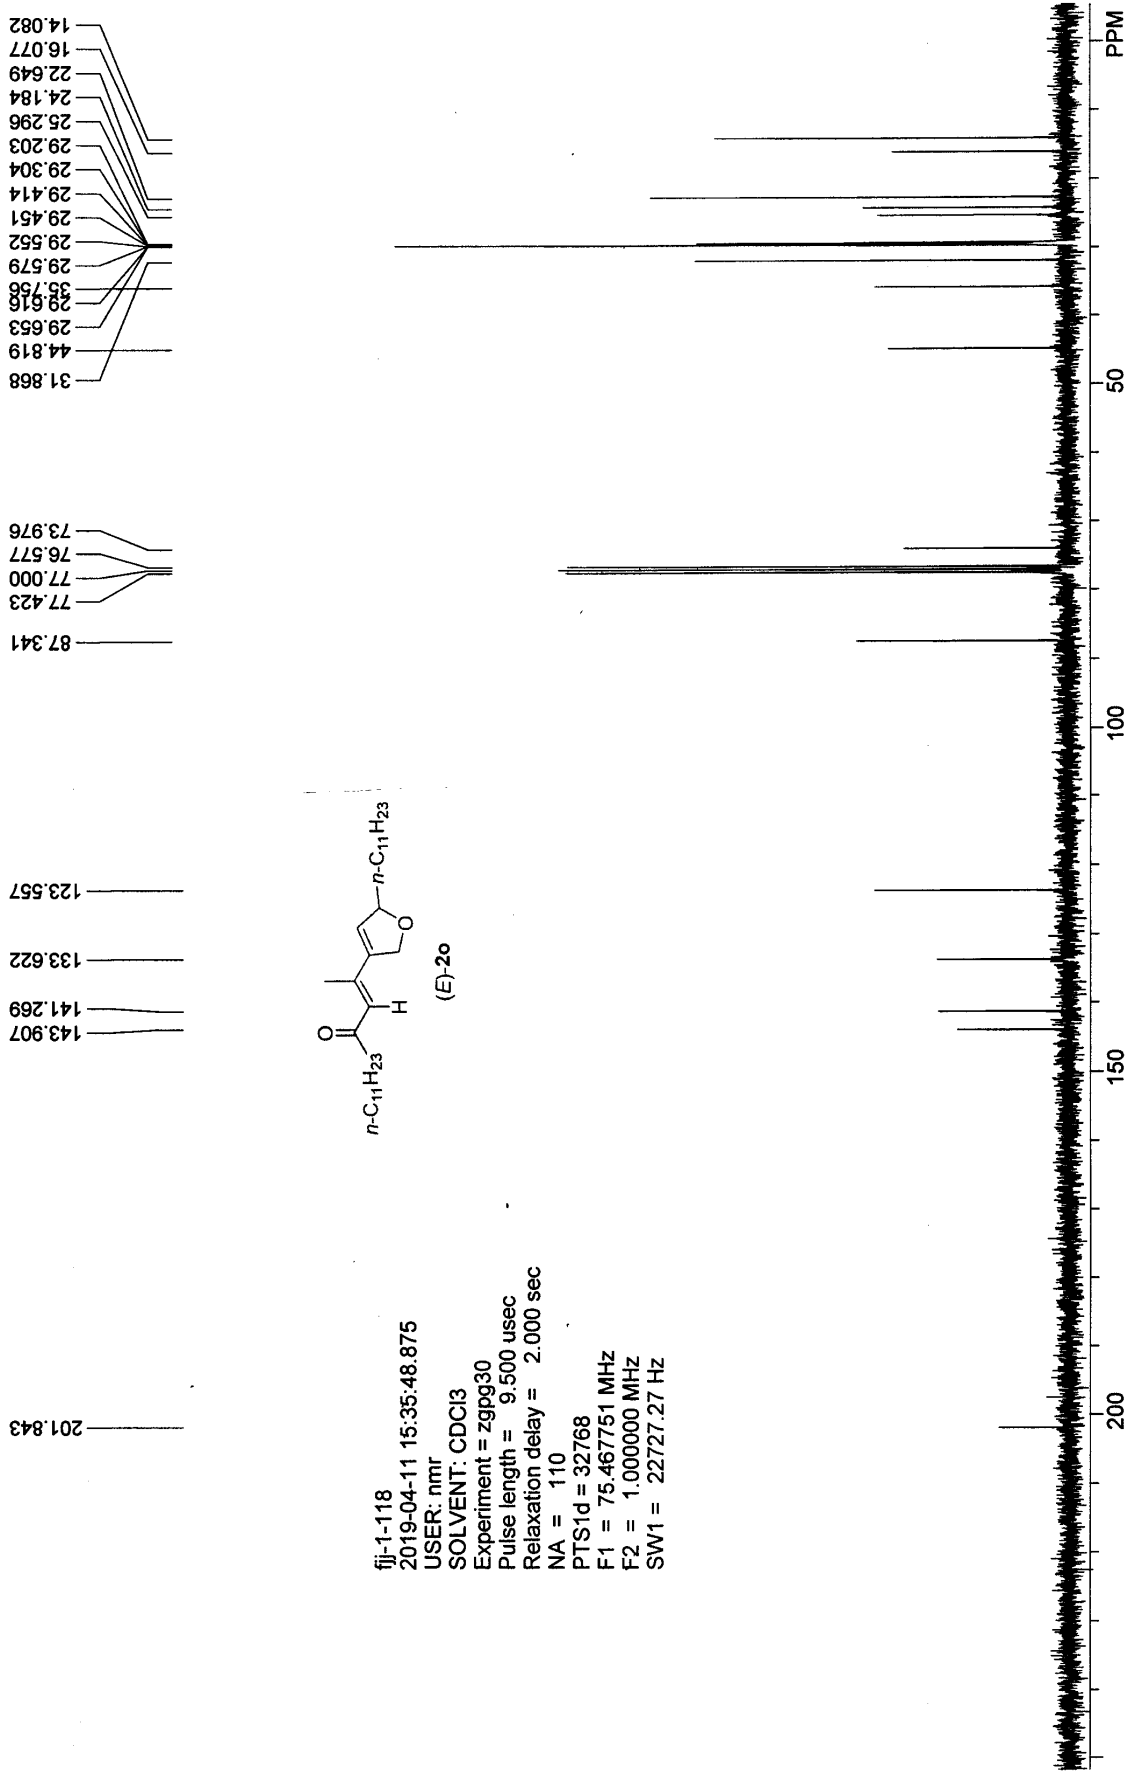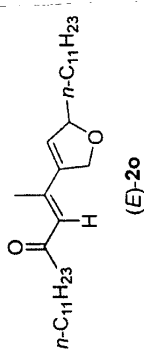

fji-1-118  
 2019-04-11 15:35:48.875  
 USER: nmr  
 SOLVENT: CDCl3  
 Experiment = zgpg30  
 Pulse length = 9.500 usec  
 Relaxation delay = 2.000 sec  
 NA = 110  
 PTS1d = 32768  
 F1 = 75.467751 MHz  
 F2 = 1.000000 MHz  
 SW1 = 22727.27 Hz

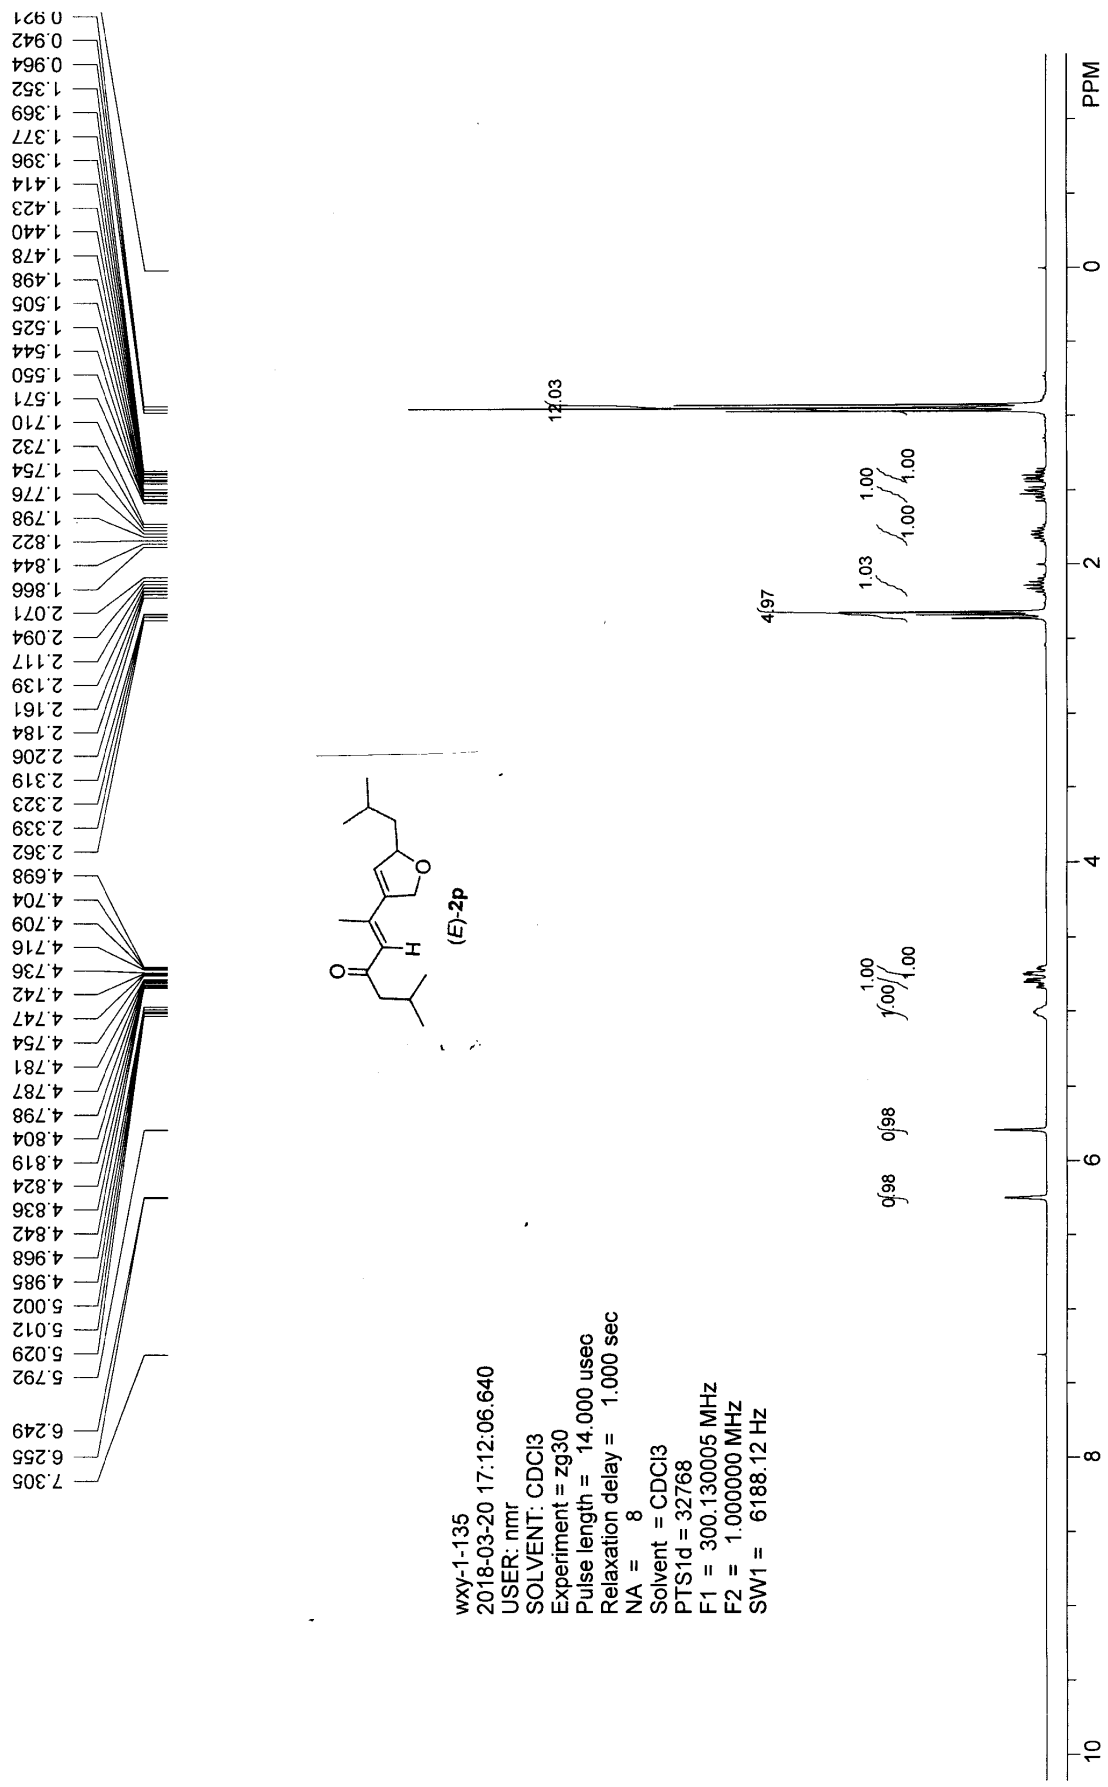

wxy-1-135  
 2018-03-20 17:12:06.640  
 USER: nmr  
 SOLVENT: CDCl<sub>3</sub>  
 Experiment = zg30  
 Pulse length = 14.000 usec  
 Relaxation delay = 1.000 sec  
 NA = 8  
 Solvent = CDCl<sub>3</sub>  
 PTS1d = 32768  
 F1 = 300.130005 MHz  
 F2 = 1.000000 MHz  
 SW1 = 6188.12 Hz

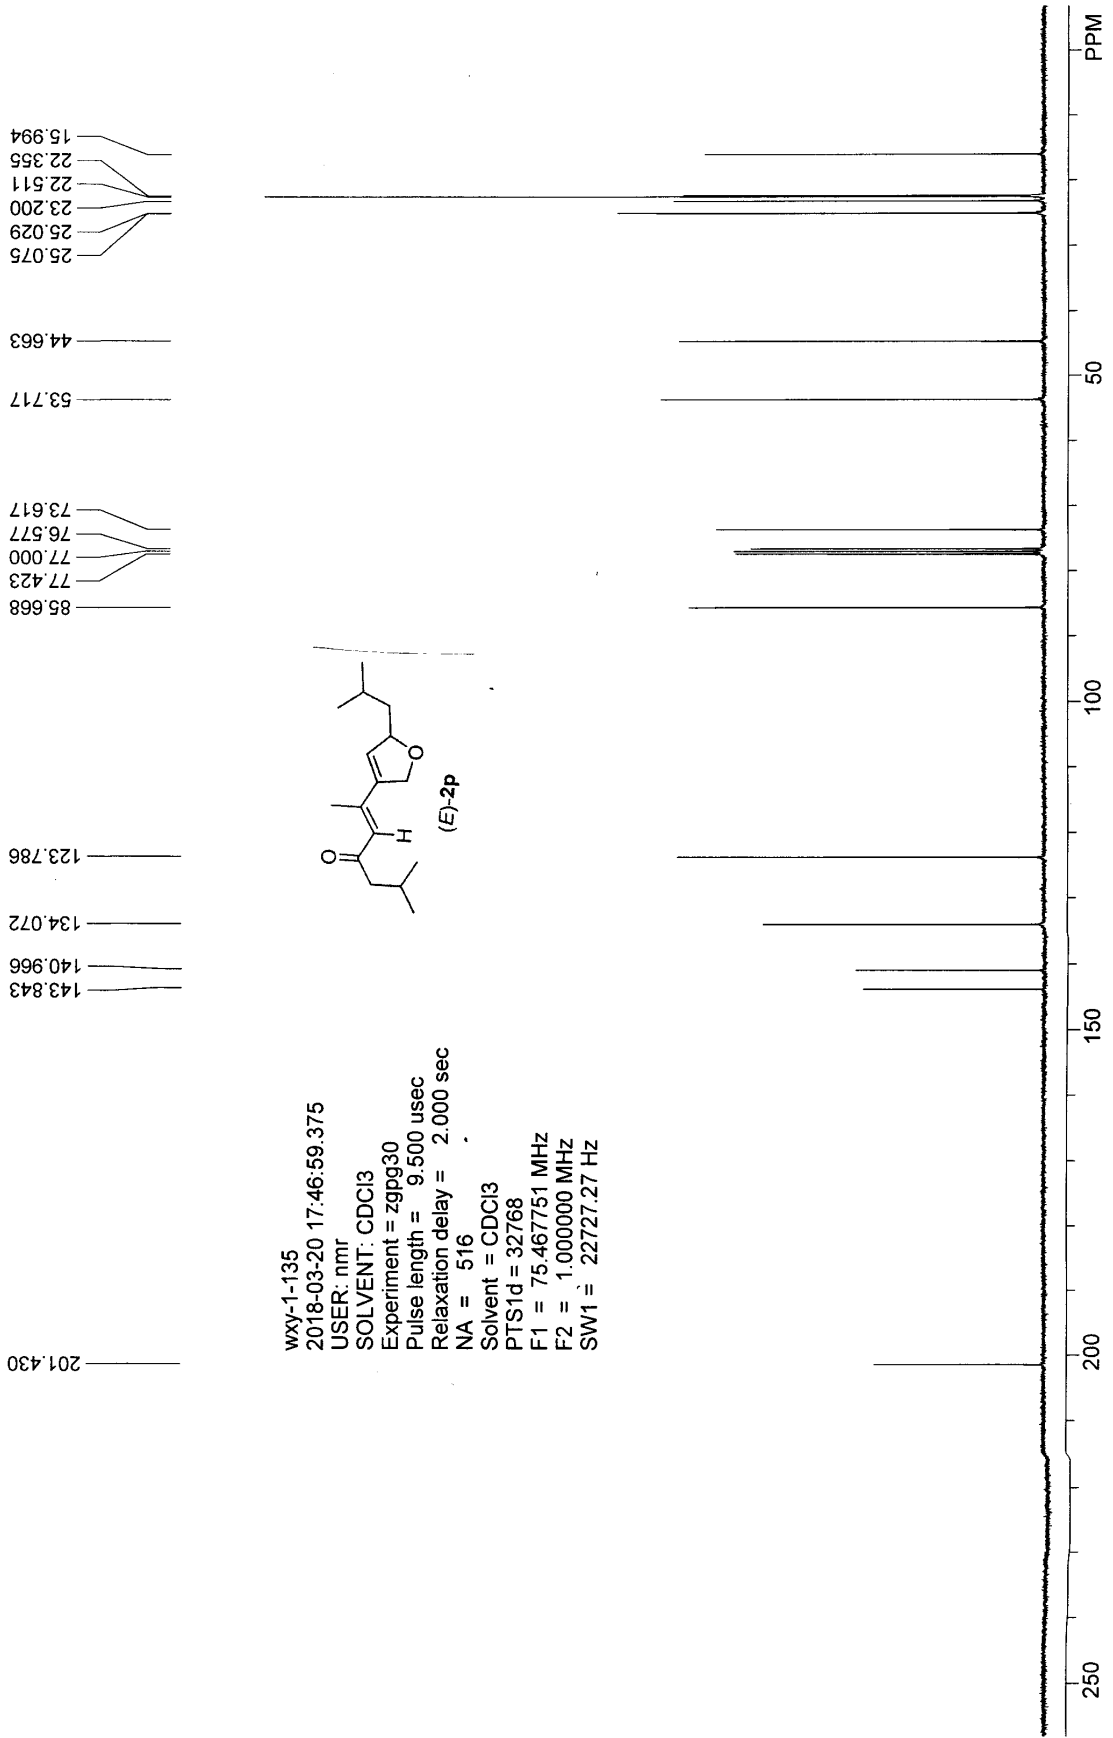

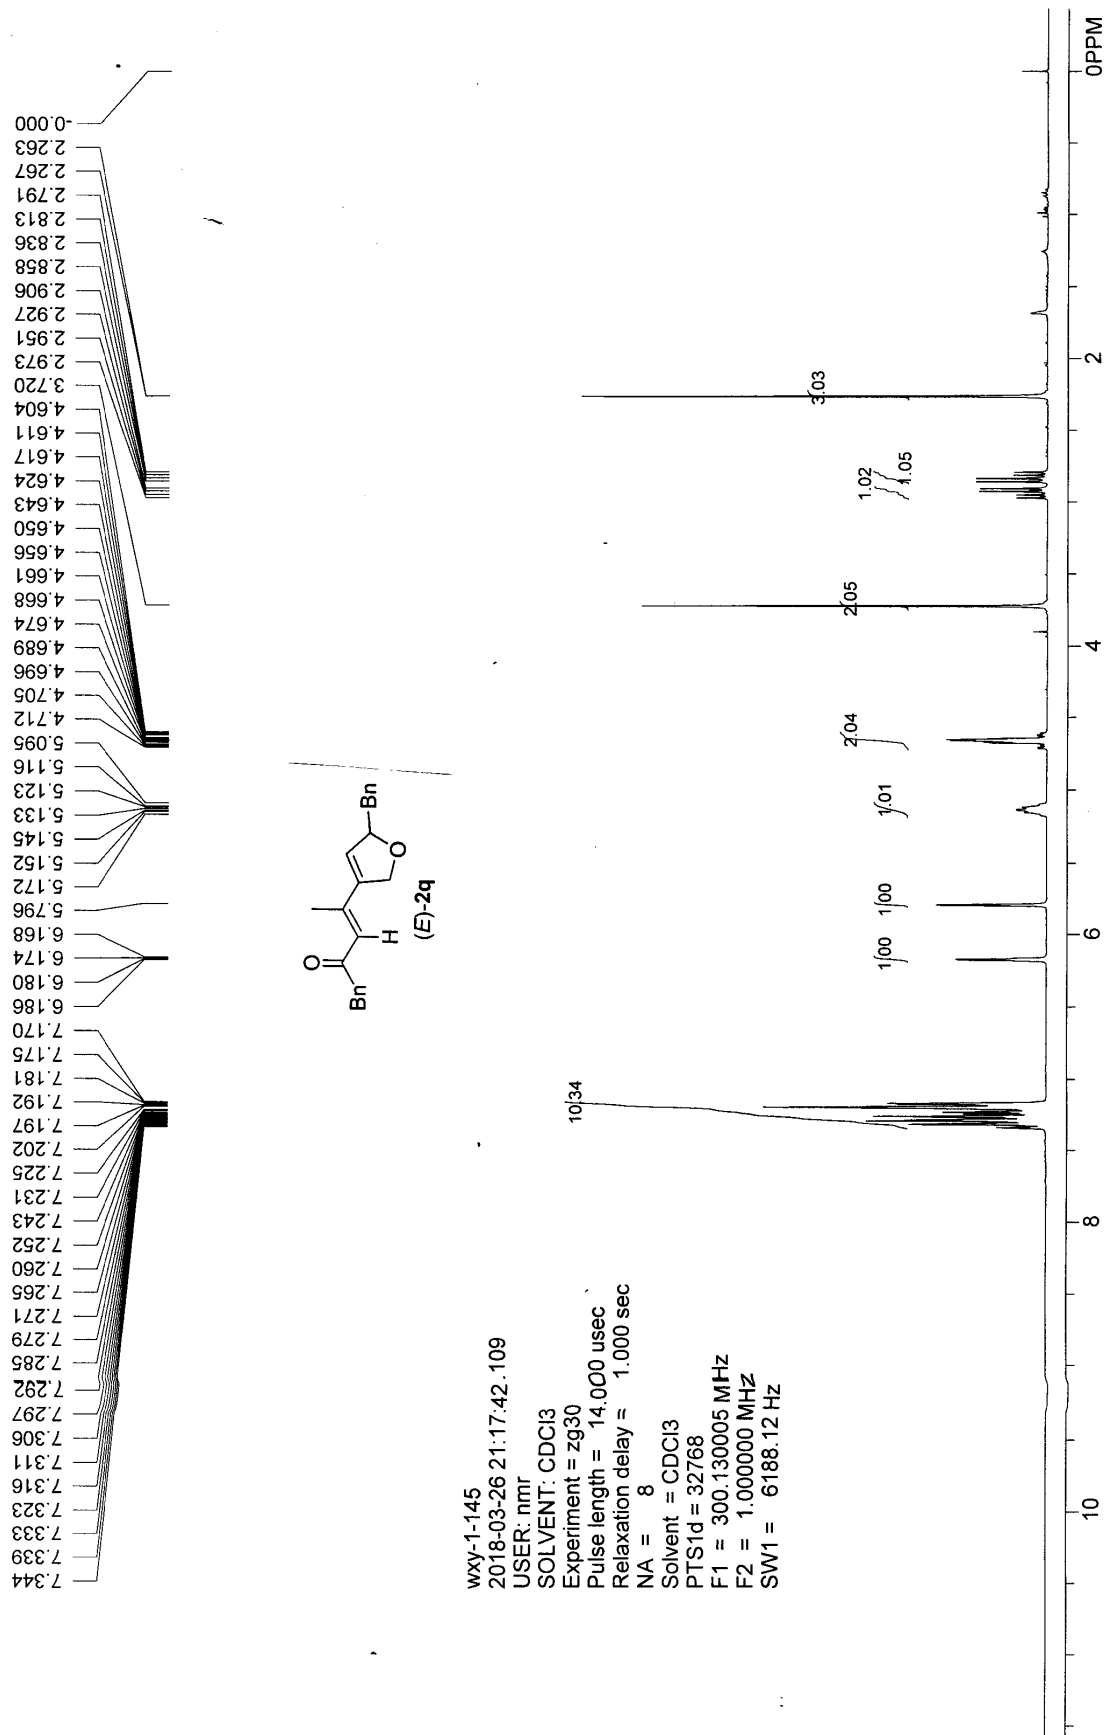

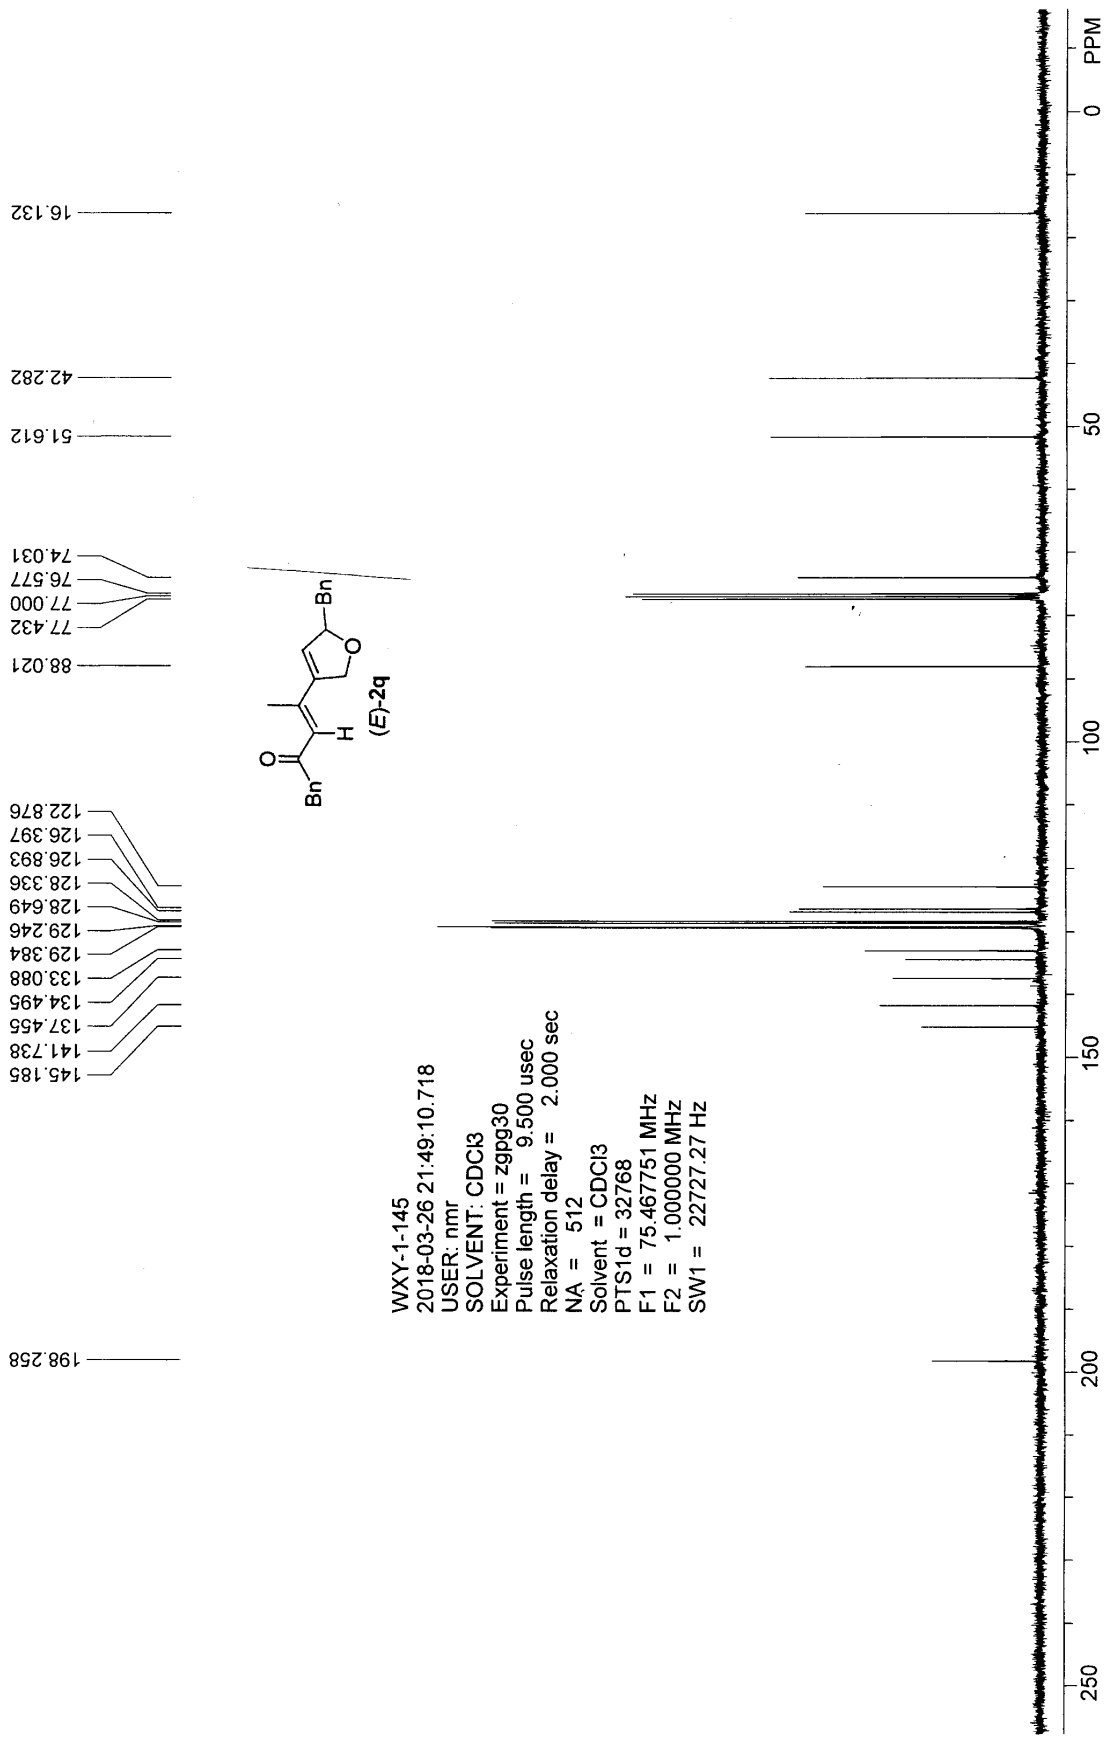

WXY-1-145  
 2018-03-26 21:49:10.718  
 USER: nmr  
 SOLVENT: CDCl3  
 Experiment = zgpg30  
 Pulse length = 9.500 usec  
 Relaxation delay = 2.000 sec  
 NA = 512  
 Solvent = CDCl3  
 P1 = 32768  
 F1 = 75.46751 MHz  
 F2 = 1.000000 MHz  
 SW1 = 22727.27 Hz

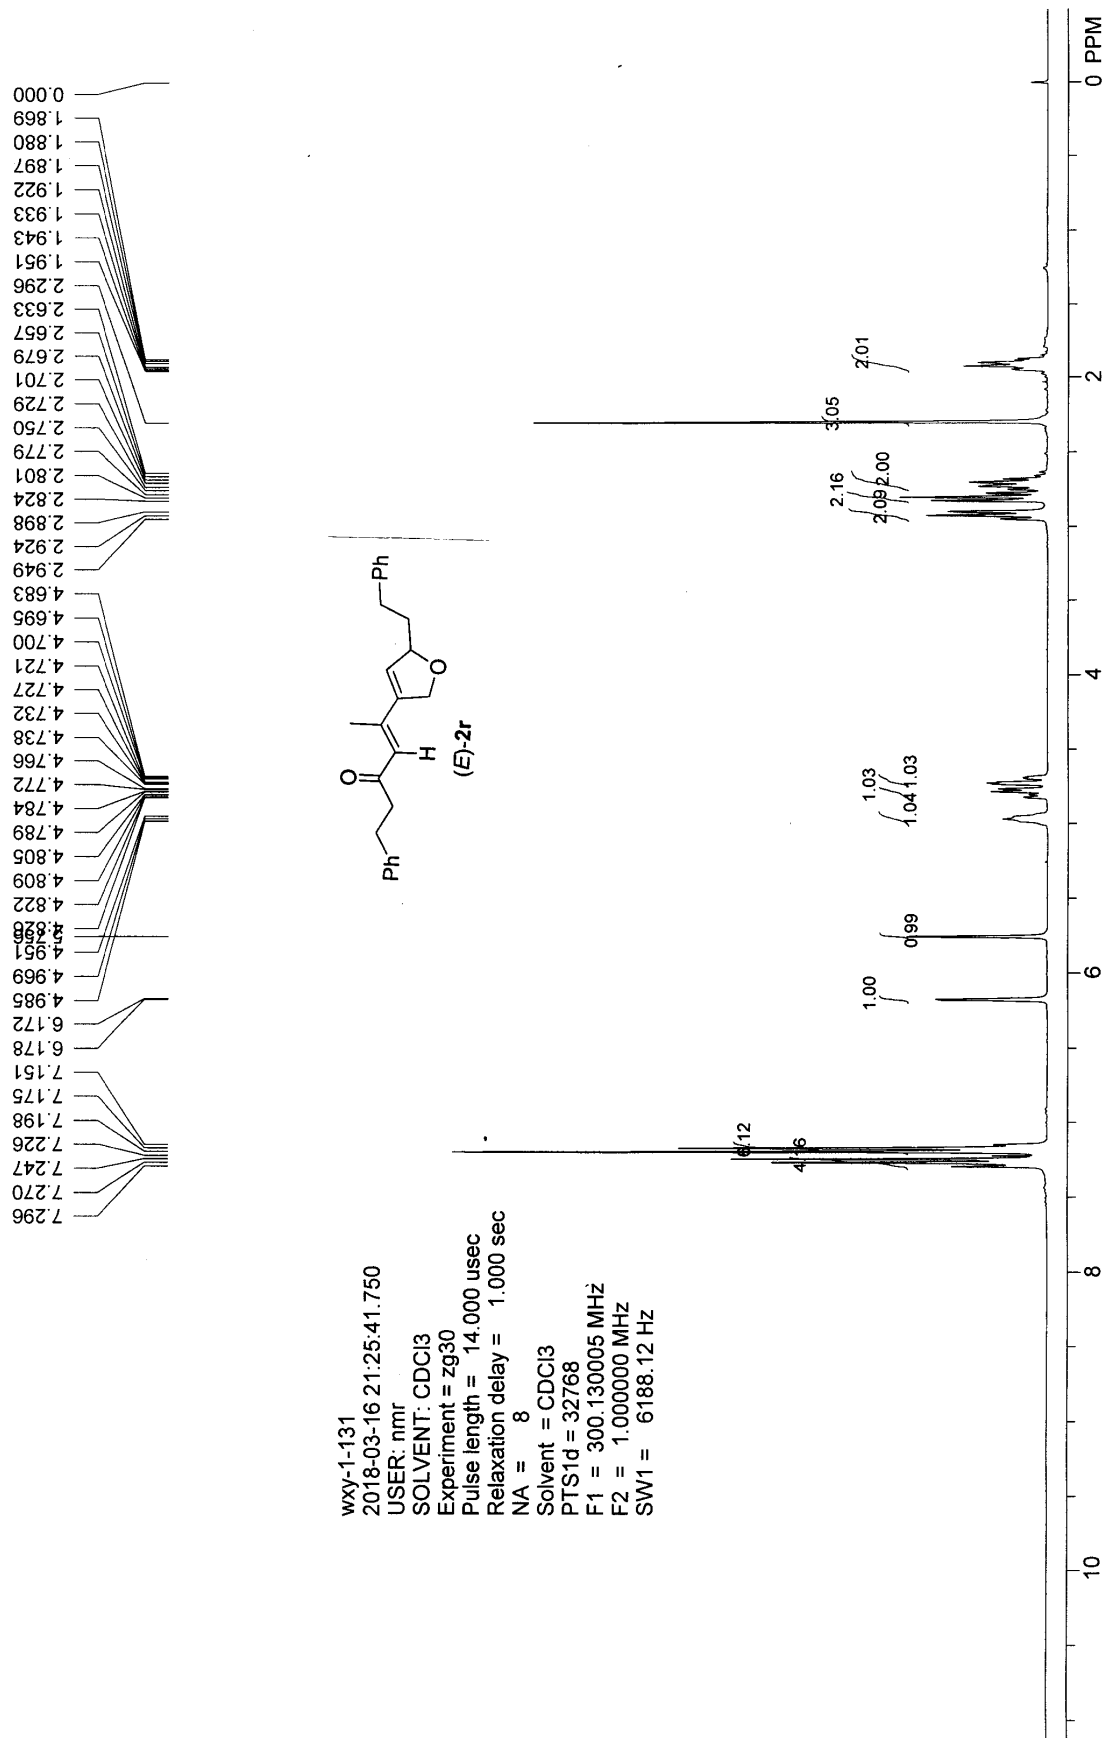

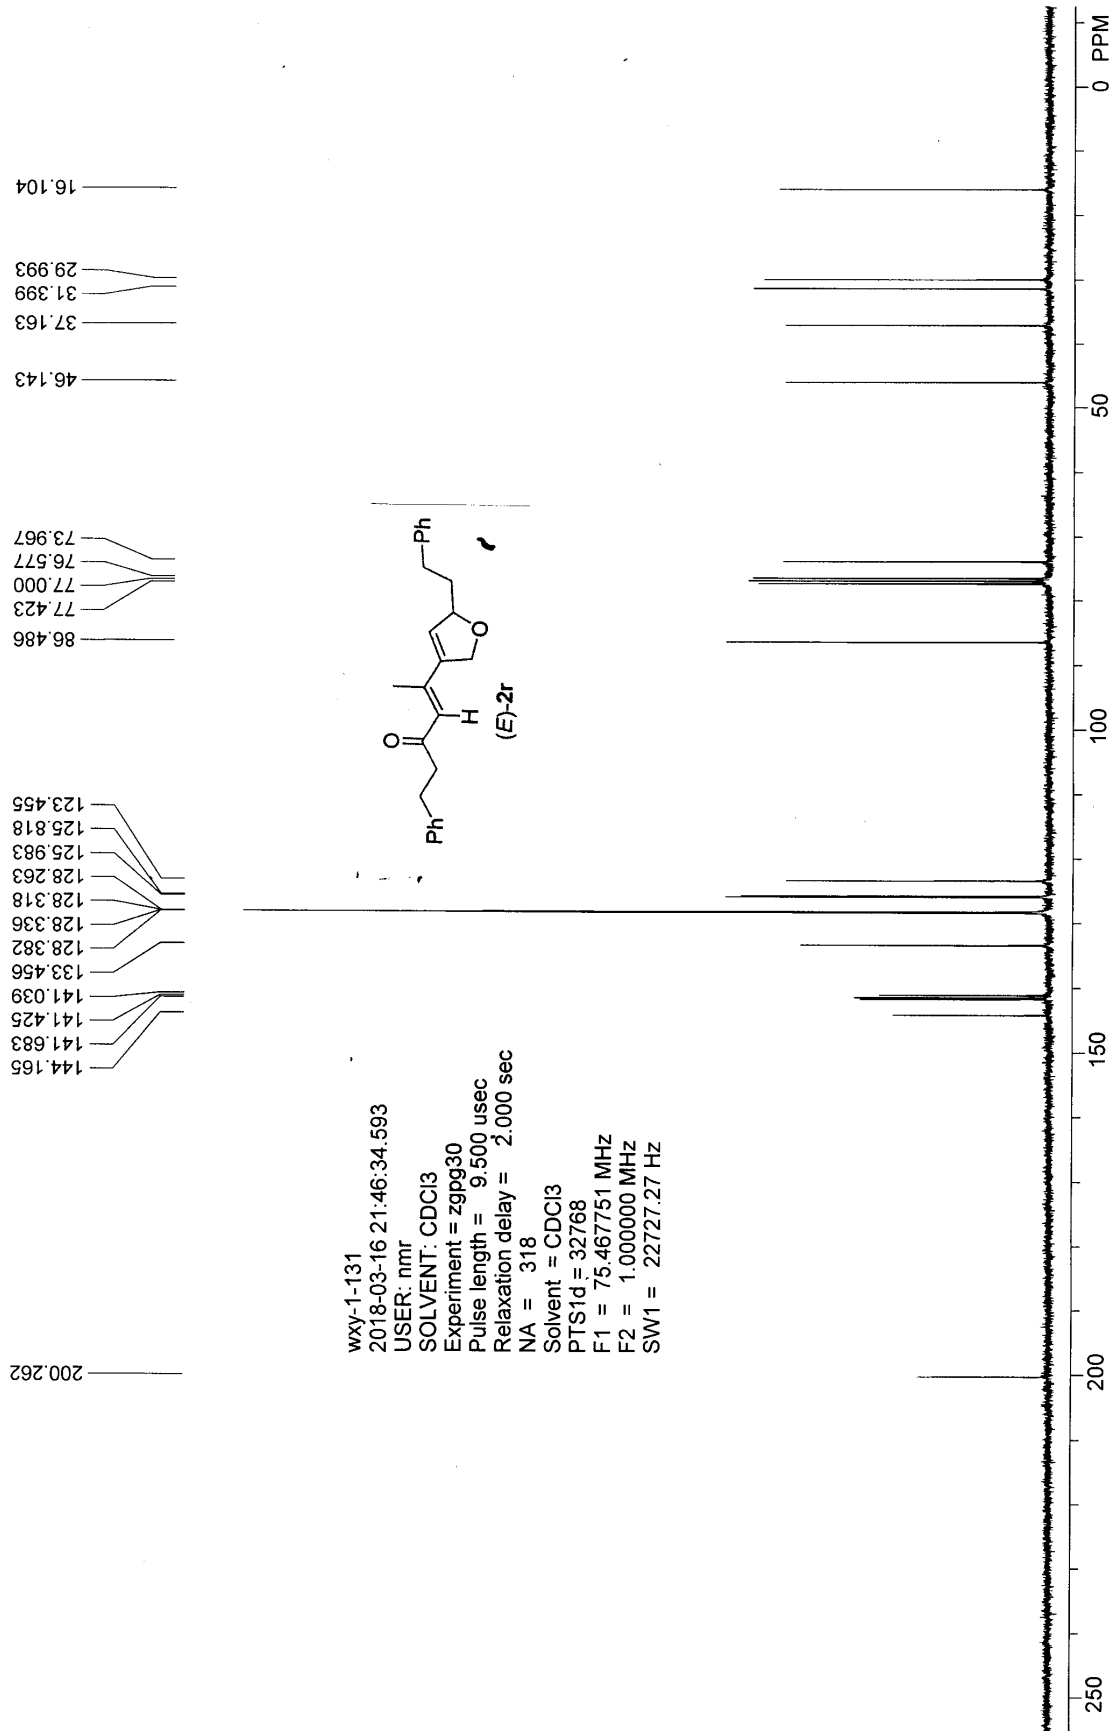

200.262  
 144.165  
 141.683  
 141.425  
 141.039  
 133.456  
 128.382  
 128.336  
 128.318  
 128.263  
 125.983  
 125.818  
 123.455  
 86.486  
 77.423  
 77.000  
 76.577  
 73.967  
 46.143  
 37.163  
 31.399  
 29.993  
 16.104

wxy-1-131  
 2018-03-16 21:46:34.593  
 USER: nmr  
 SOLVENT: CDCl3  
 Experiment = zgpg30  
 Pulse length = 9.500 usec  
 Relaxation delay = 2.000 sec  
 NA = 318  
 Solvent = CDCl3  
 PTS1d = 32768  
 F1 = 75.467751 MHz  
 F2 = 1.000000 MHz  
 SW1 = 22727.27 Hz

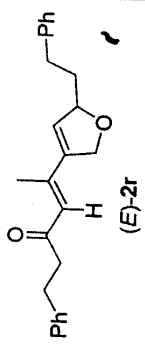



7.297  
6.245  
6.240  
5.804  
4.982  
4.966  
4.950  
4.847  
4.830  
4.809  
4.792  
4.770  
4.764  
4.759  
4.727  
3.565  
3.542  
3.522  
2.532  
2.508  
2.484  
2.327  
1.841  
1.818  
1.795  
1.769  
1.747  
1.684  
1.659  
1.634  
1.609  
1.584  
1.503  
1.486  
1.476  
1.464  
1.453  
1.425  
1.404  
-0.000

wxy-2-018  
2018-05-12 21:24:00.125  
USER: nmr  
SOLVENT: CDCl3  
Experiment = zg30  
Pulse length = 14.000 usec  
Relaxation delay = 1.000 sec  
NA = 8  
Solvent = CDCl3  
PTS1d = 32768  
F1 = 300.130005 MHz  
F2 = 1.000000 MHz  
SW1 = 6188.12 Hz

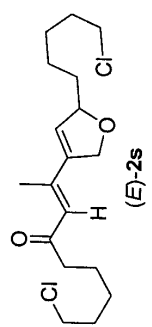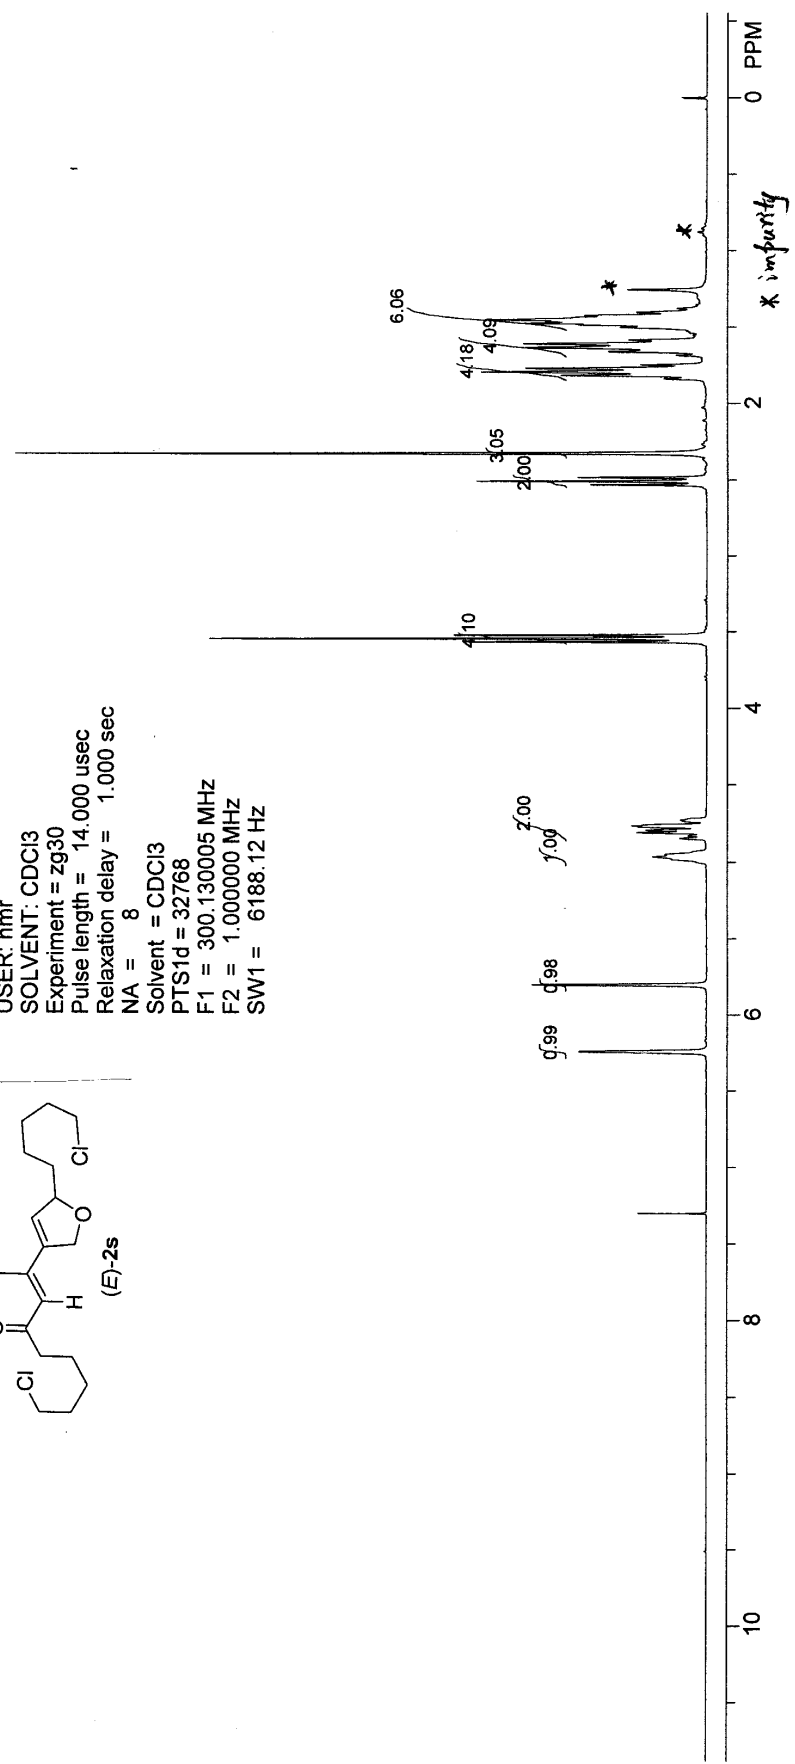

44.801  
44.663  
44.213  
35.288  
32.291  
32.190  
26.666  
26.206  
24.358  
23.081  
15.939

86.900  
77.423  
77.000  
76.577  
73.820

143.880  
141.196  
133.383  
123.327

200.952

wxy-2-018  
2018-05-11 22:42:04.406  
USER: nmr  
SOLVENT: CDCl3  
Experiment = zgpg30  
Pulse length = 9.500 usec  
Relaxation delay = 2.000 sec  
NA = 131  
Solvent = CDCl3  
PTS1d = 32768  
F1 = 75.467751 MHz  
F2 = 1.000000 MHz  
SW1 = 22727.27 Hz

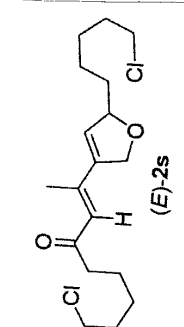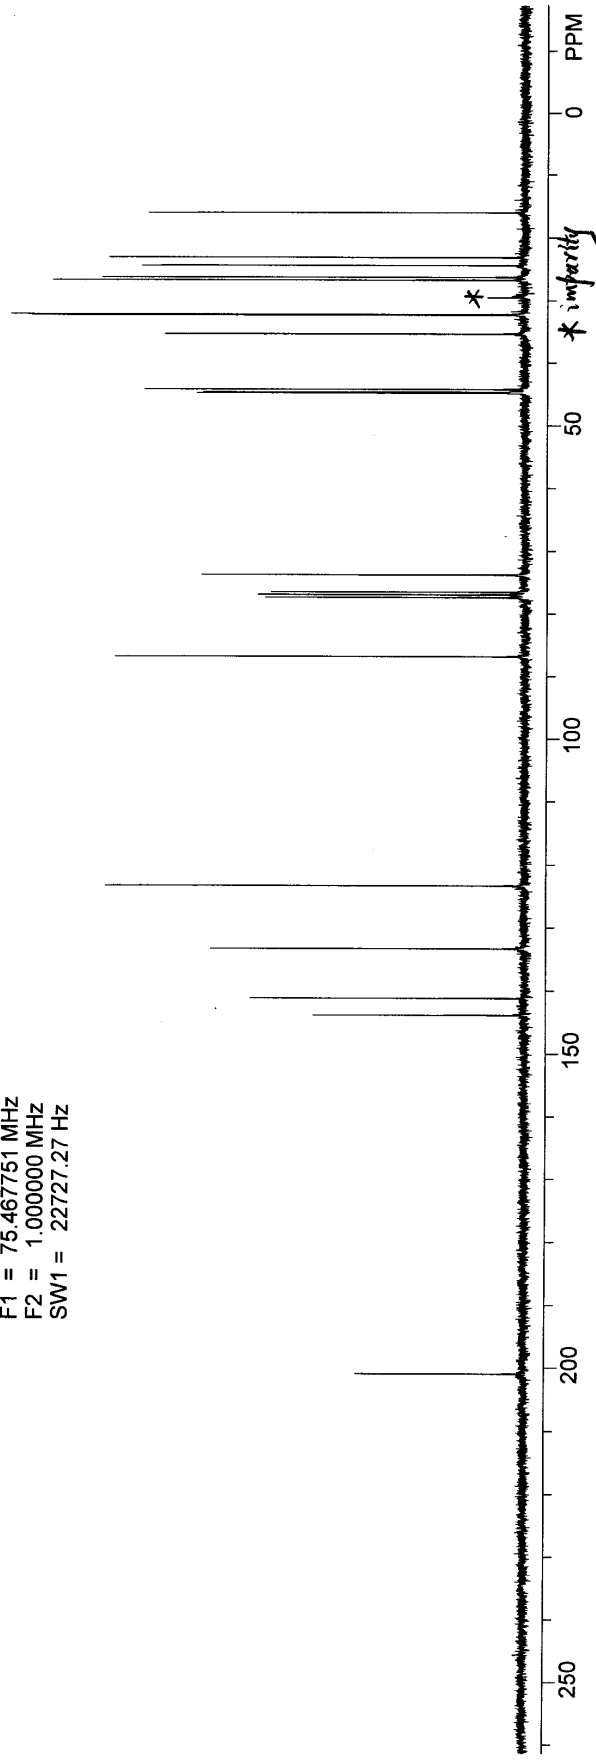

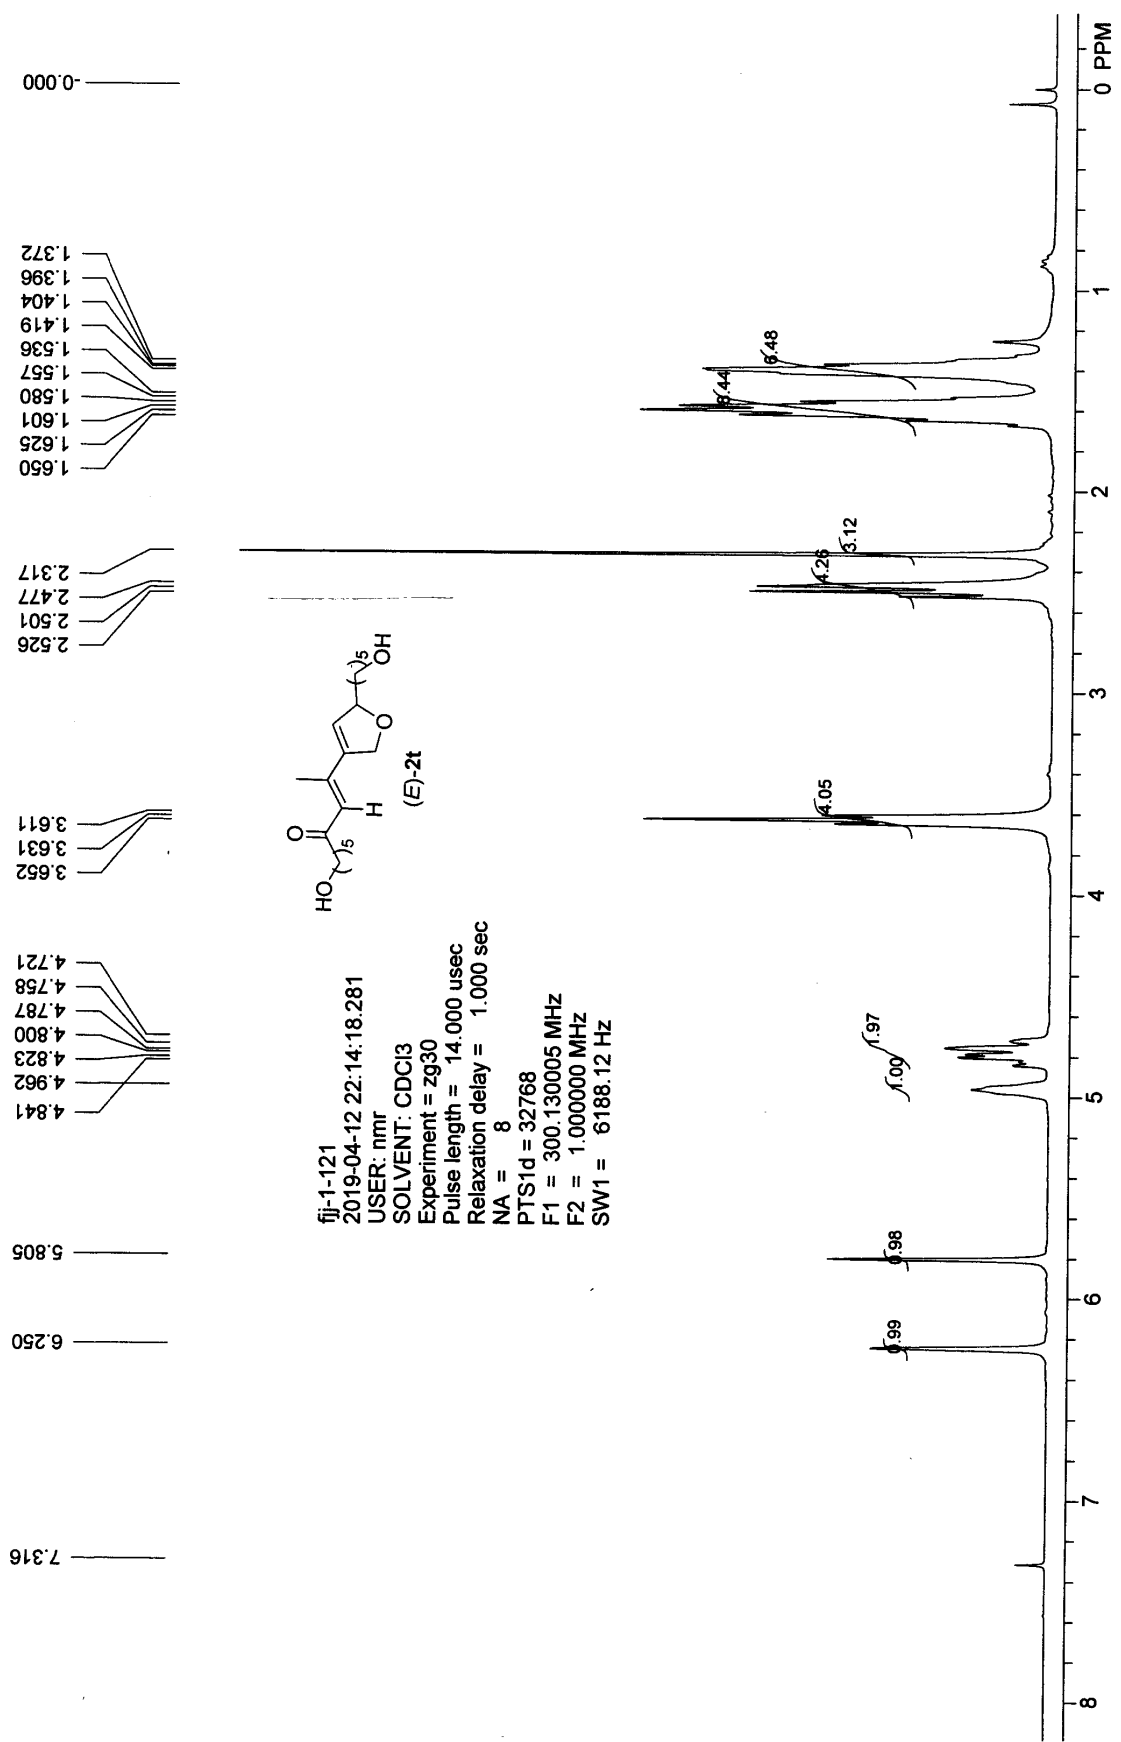

44.507  
35.499  
32.447  
32.273  
25.636  
25.177  
24.928  
23.642  
16.031

87.129  
77.423  
77.000  
76.568  
73.856  
62.449  
62.266

144.063  
141.122  
133.548  
123.428

201.687

fji-1-121  
2019-04-12 22:21:02.921  
USER: nmr  
SOLVENT: CDCl3  
Experiment = zgpg30  
Pulse length = 9.500 usec  
Relaxation delay = 2.000 sec  
NA = 95  
PTS1d = 32768  
F1 = 75.467751 MHz  
F2 = 1.000000 MHz  
SW1 = 22727.27 Hz

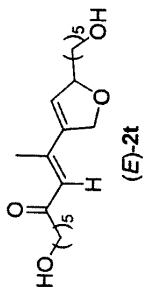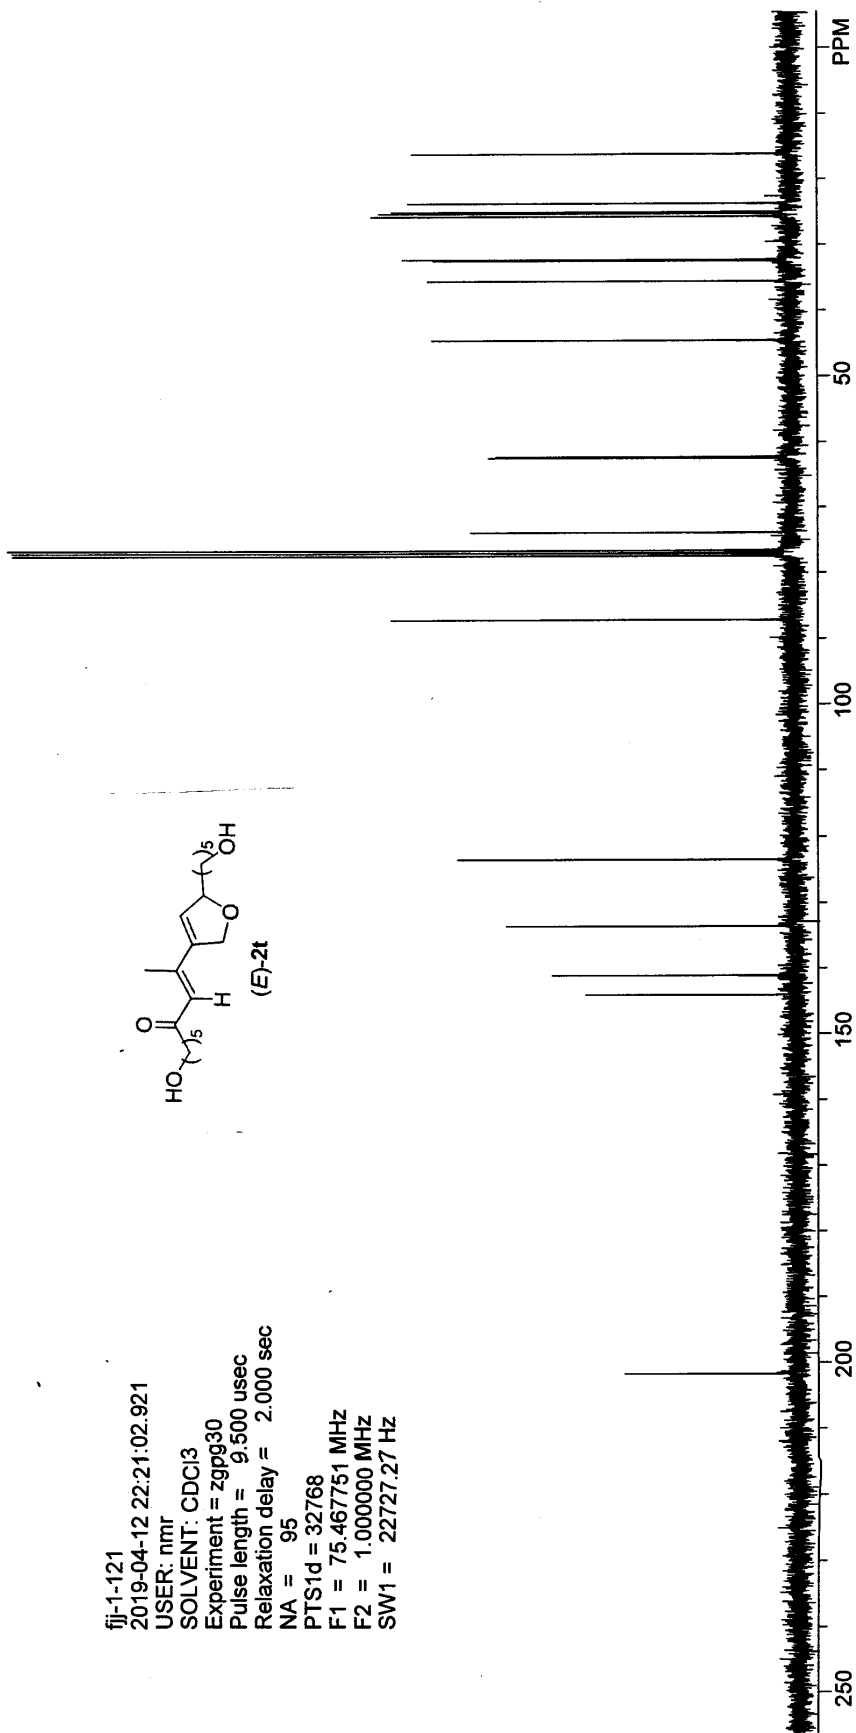

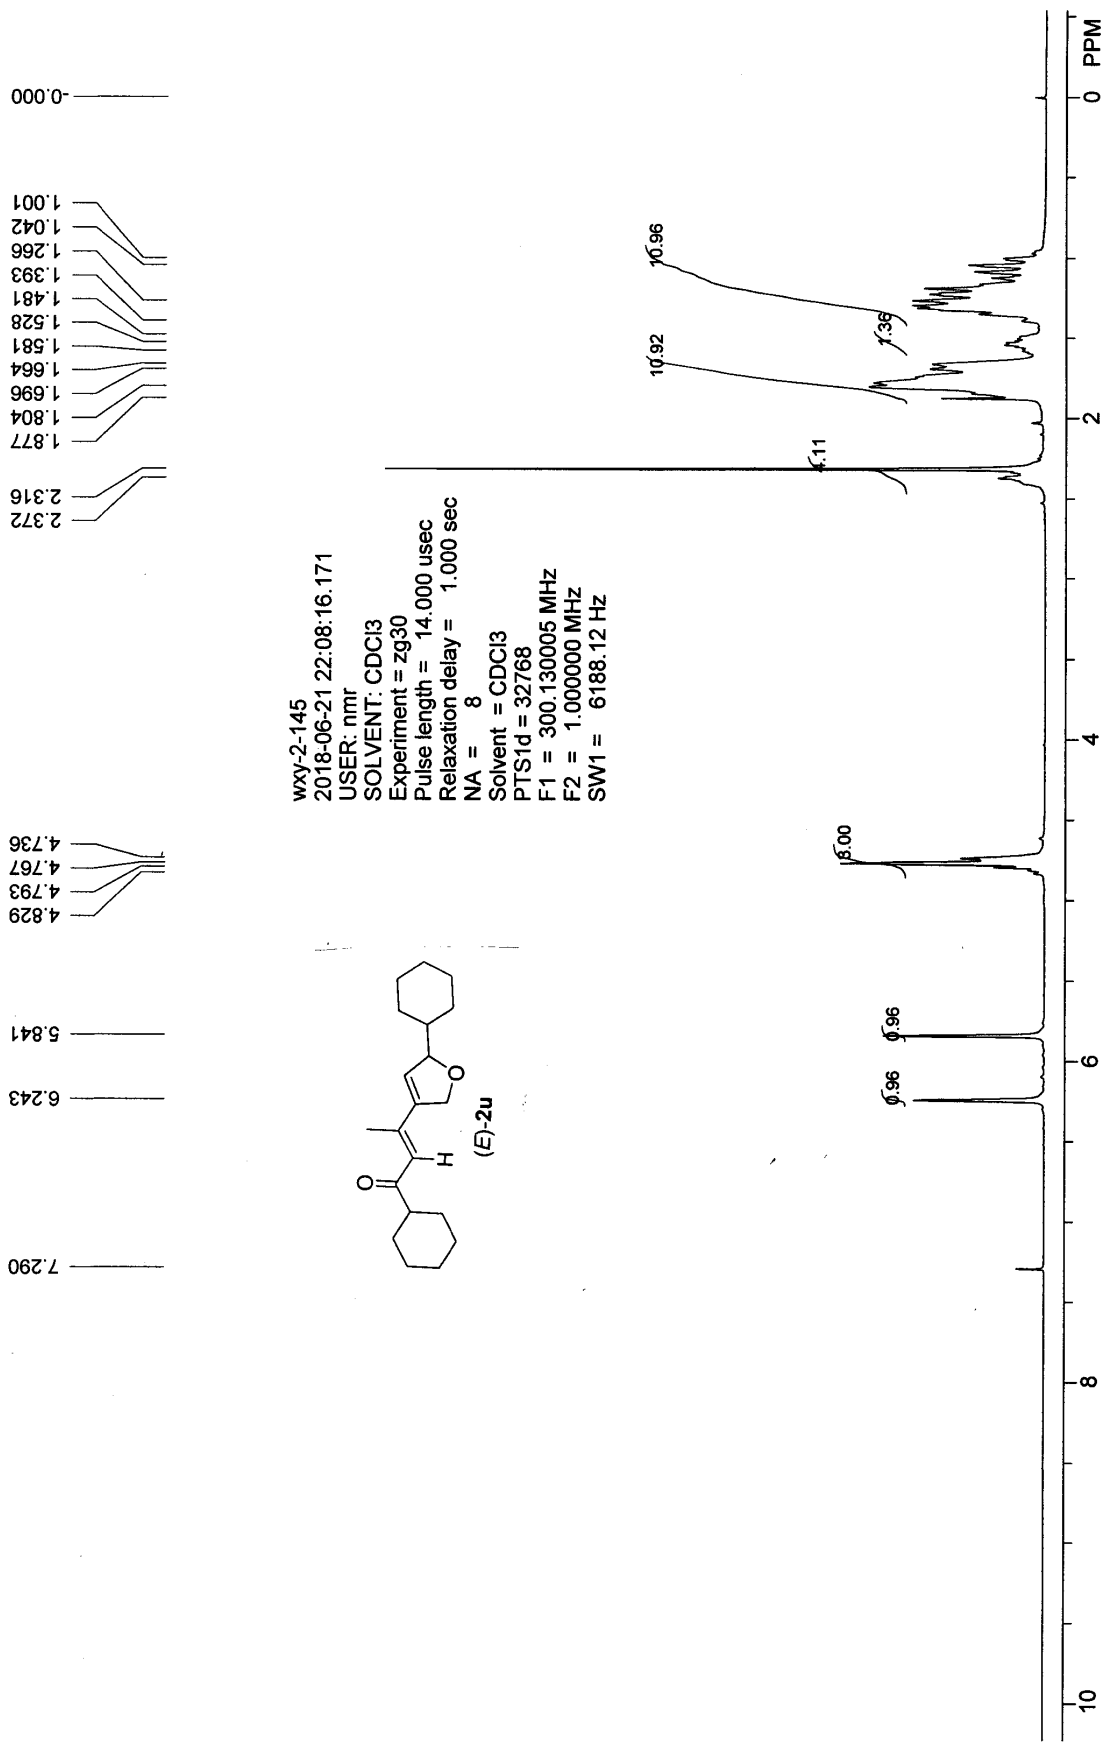

wxy-2-145  
 2018-06-21 22:08:16.171  
 USER: nmr  
 SOLVENT: CDCl3  
 Experiment = zg30  
 Pulse length = 14.000 usec  
 Relaxation delay = 1.000 sec  
 NA = 8  
 Solvent = CDCl3  
 PTS1d = 32768  
 F1 = 300.130005 MHz  
 F2 = 1.000000 MHz  
 SW1 = 6188.12 Hz

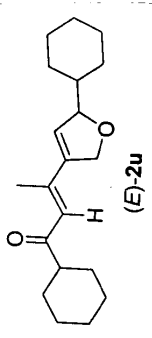

2.372  
 2.316  
 1.877  
 1.804  
 1.696  
 1.664  
 1.581  
 1.528  
 1.481  
 1.393  
 1.266  
 1.042  
 1.001  
 -0.000

4.829  
 4.793  
 4.767  
 4.736

7.290  
 6.243  
 5.841

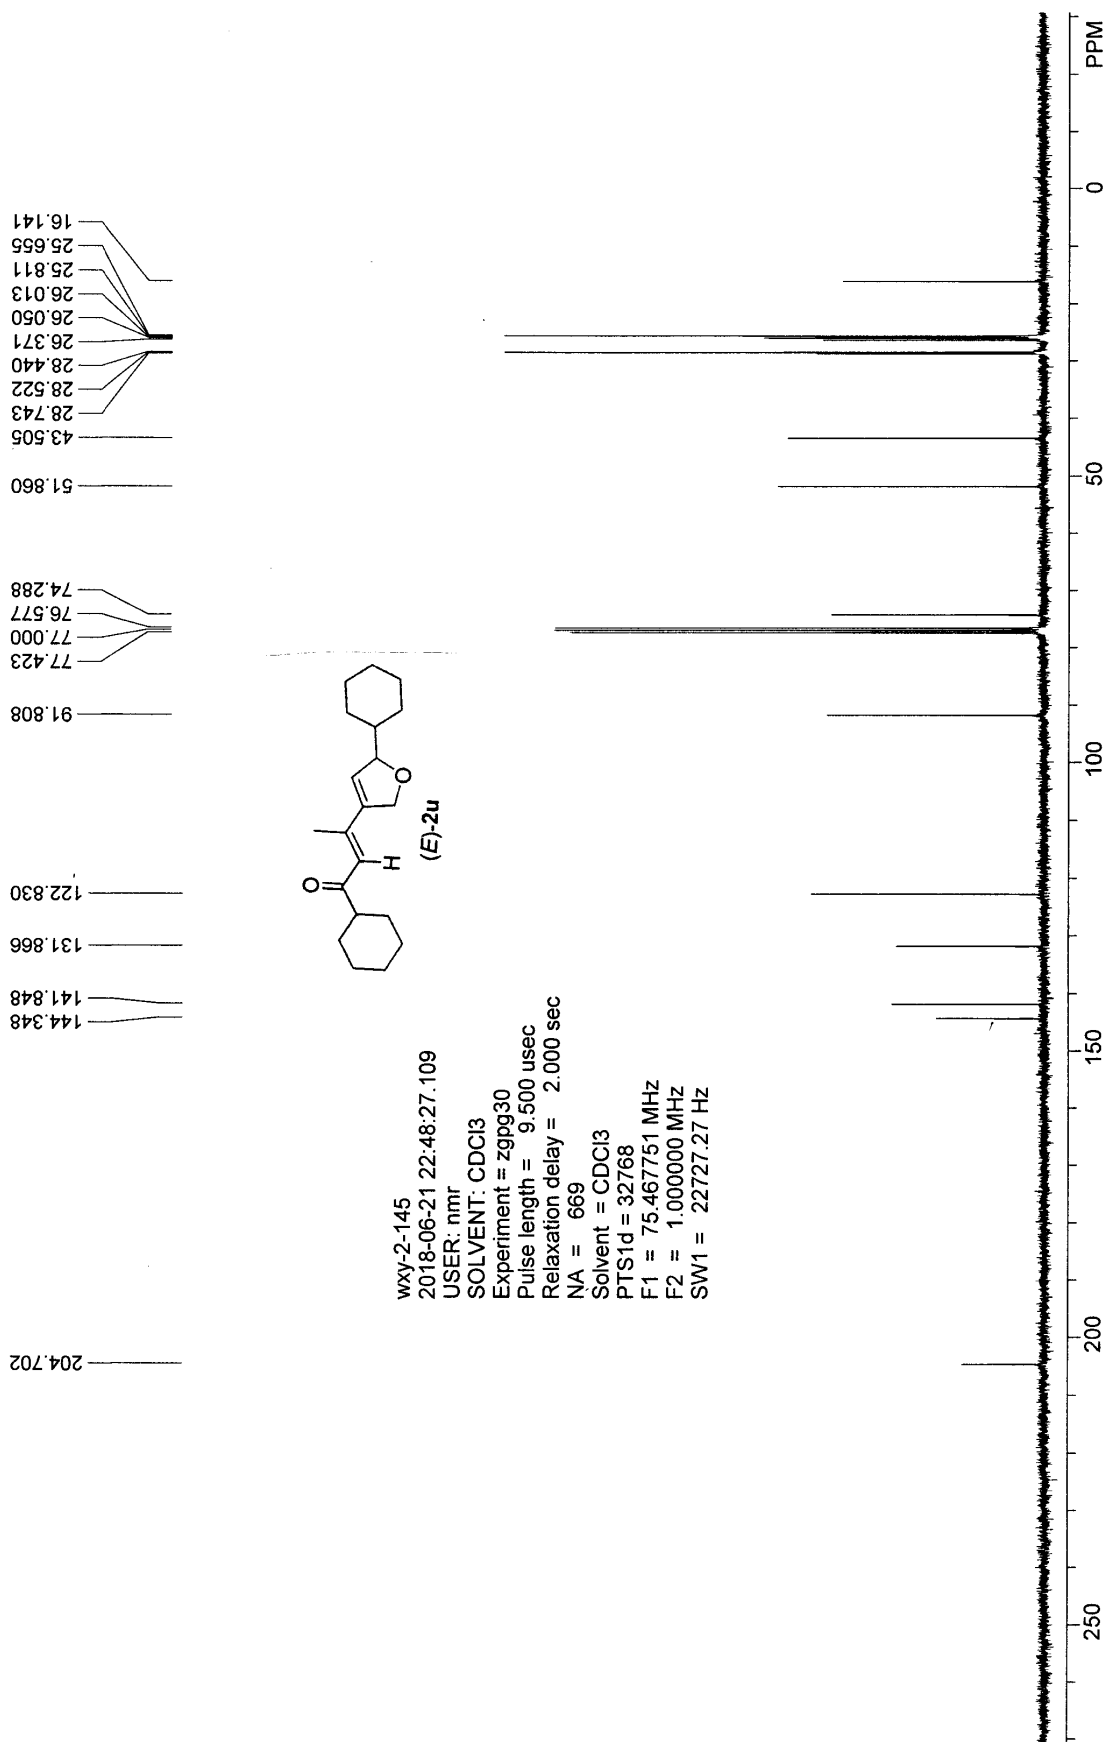

wxy-2-145  
 2018-06-21 22:48:27.109  
 USER: nmr  
 SOLVENT: CDCl3  
 Experiment = zgpg30  
 Pulse length = 9.500 usec  
 Relaxation delay = 2.000 sec  
 NA = 669  
 Solvent = CDCl3  
 PTS1d = 32768  
 F1 = 75.467751 MHz  
 F2 = 1.000000 MHz  
 SW1 = 22727.27 Hz

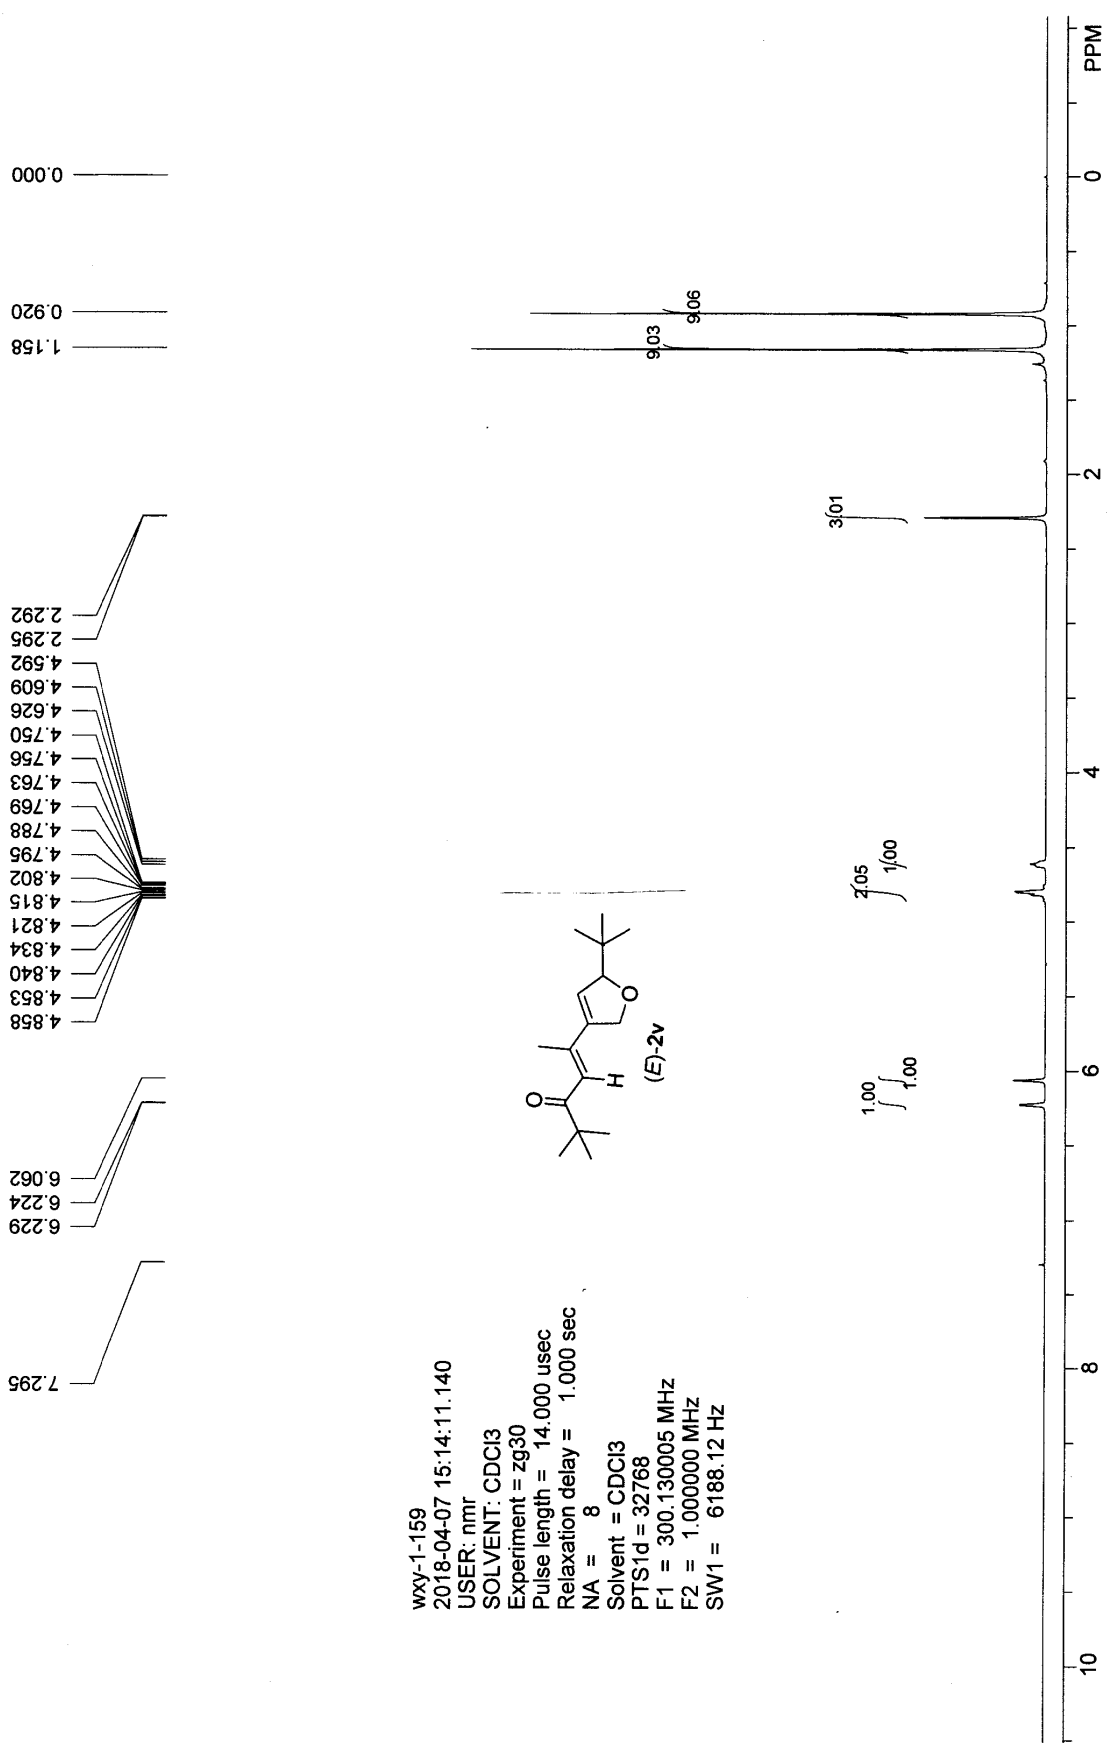

wxy-1-159  
 2018-04-07 15:14:11.140  
 USER: nmr  
 SOLVENT: CDCl3  
 Experiment = zg30  
 Pulse length = 14.000 usec  
 Relaxation delay = 1.000 sec  
 NA = 8  
 Solvent = CDCl3  
 PTS1d = 32768  
 F1 = 300.130005 MHz  
 F2 = 1.000000 MHz  
 SW1 = 6188.12 Hz

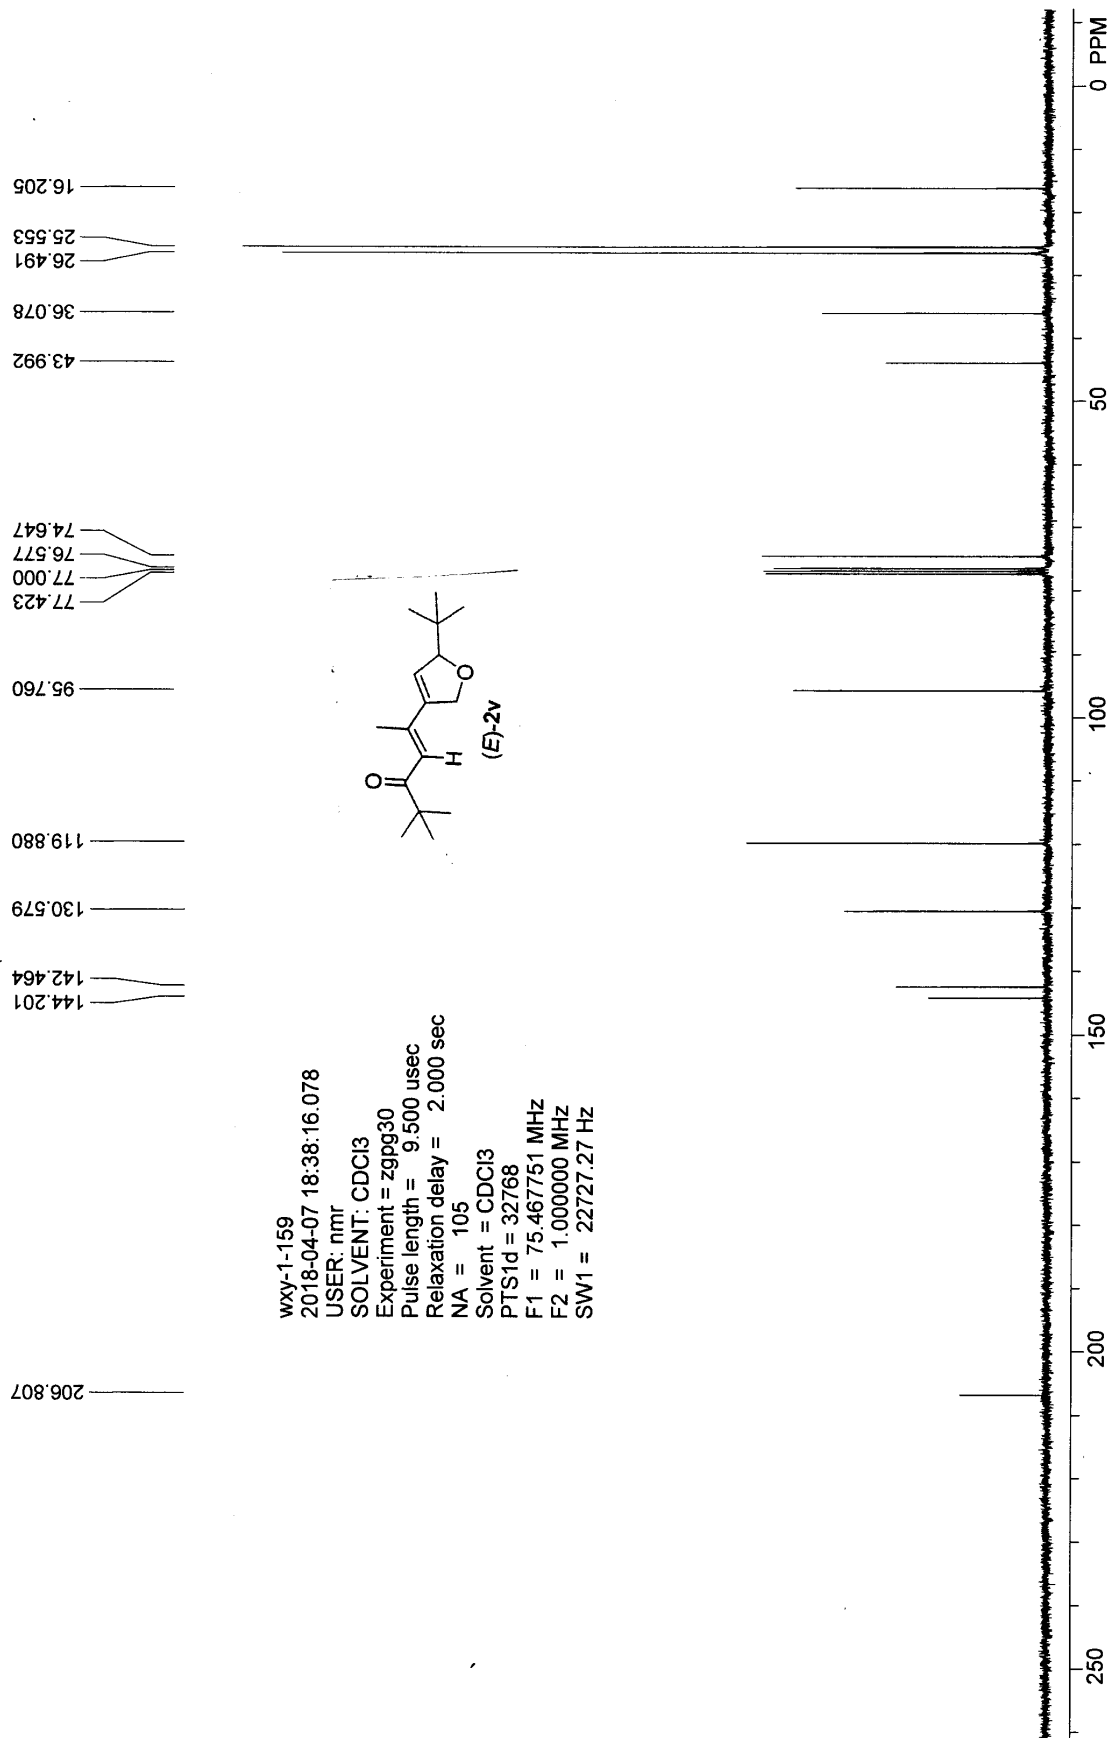

wxy-1-159  
 2018-04-07 18:38:16.078  
 USER: nmr  
 SOLVENT: CDCl3  
 Experiment = zgpg30  
 Pulse length = 9.500 usec  
 Relaxation delay = 2.000 sec  
 NA = 105  
 Solvent = CDCl3  
 PTS1d = 32768  
 F1 = 75.467751 MHz  
 F2 = 1.000000 MHz  
 SW1 = 22727.27 Hz



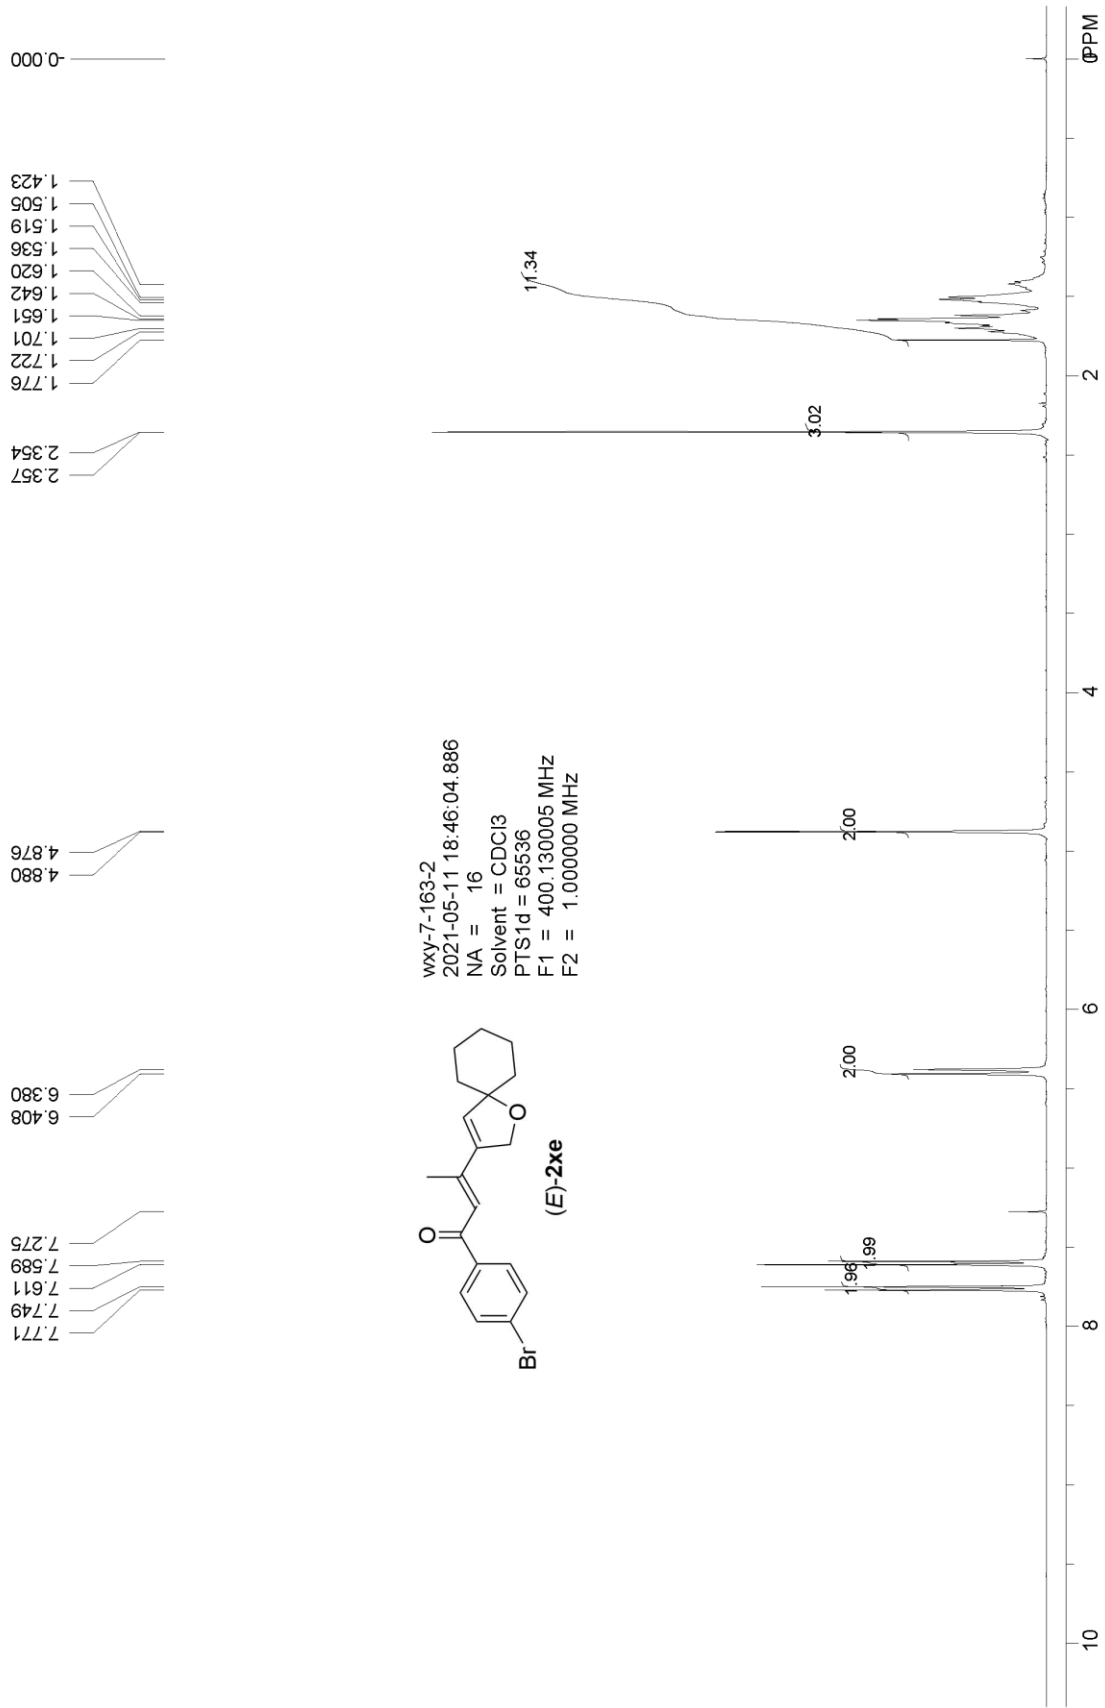

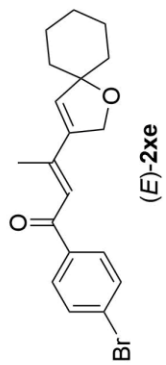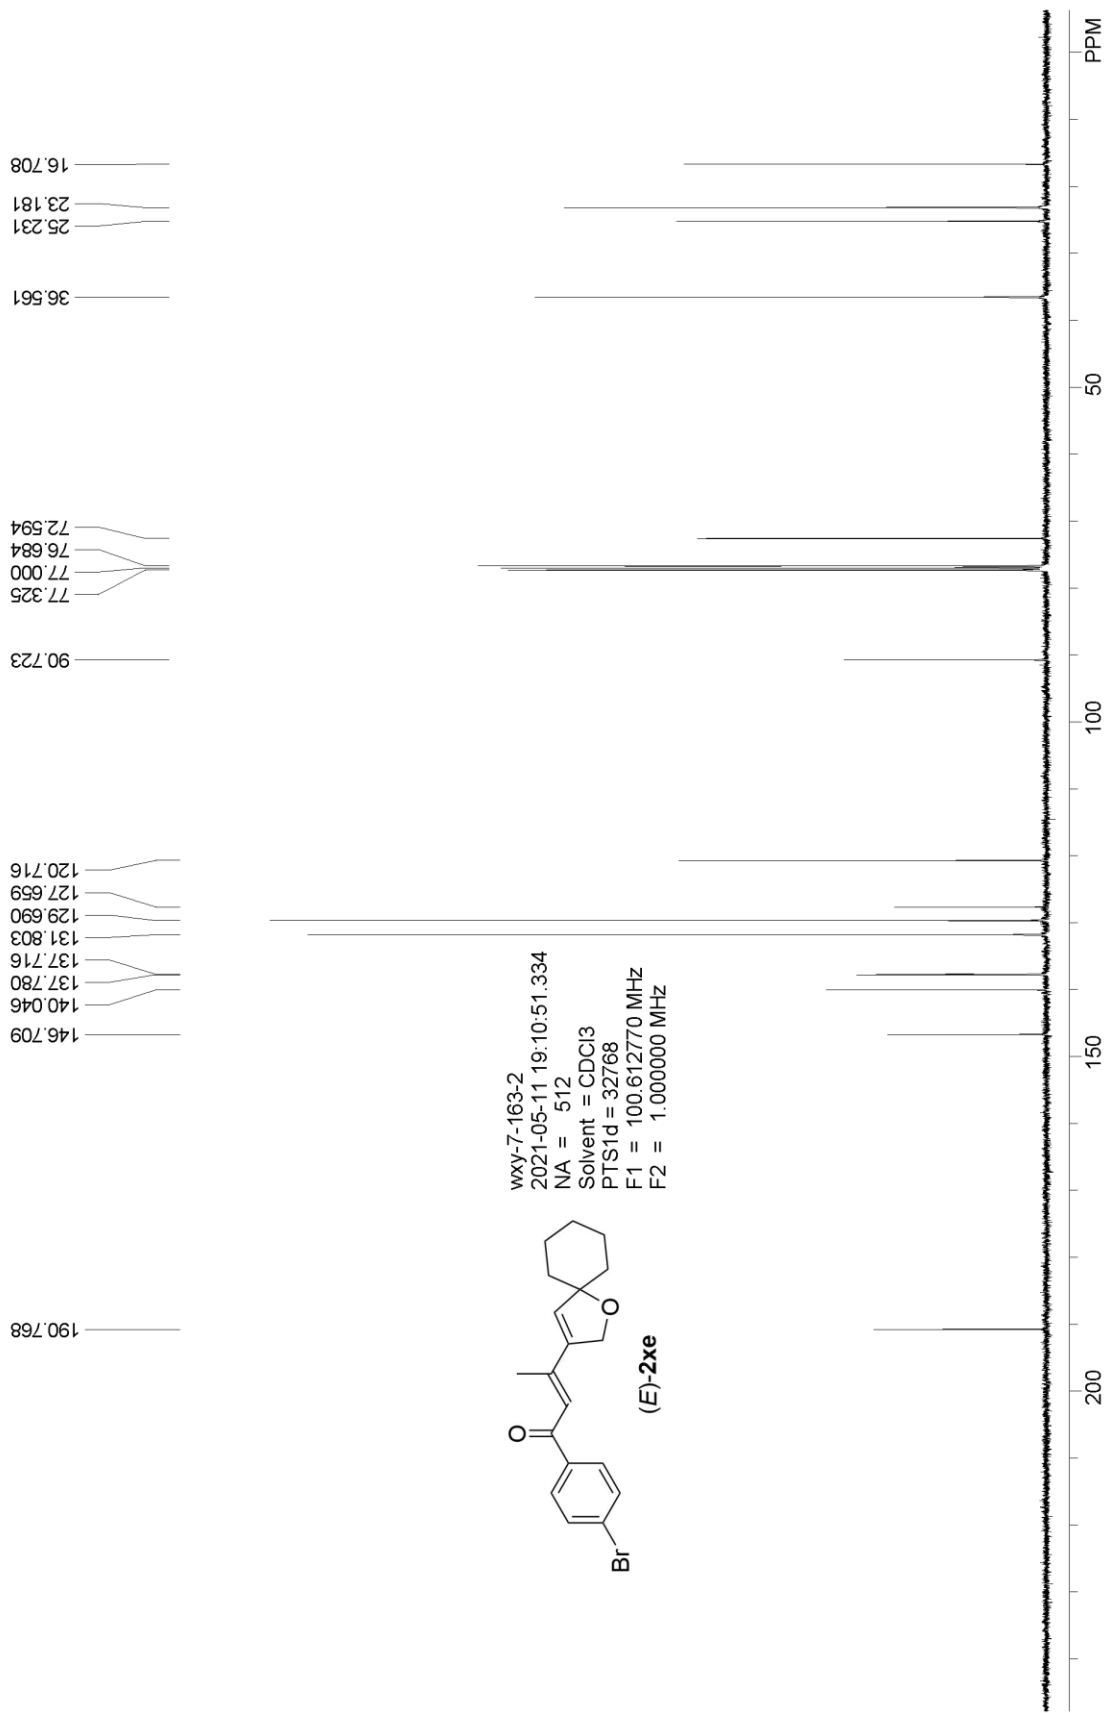

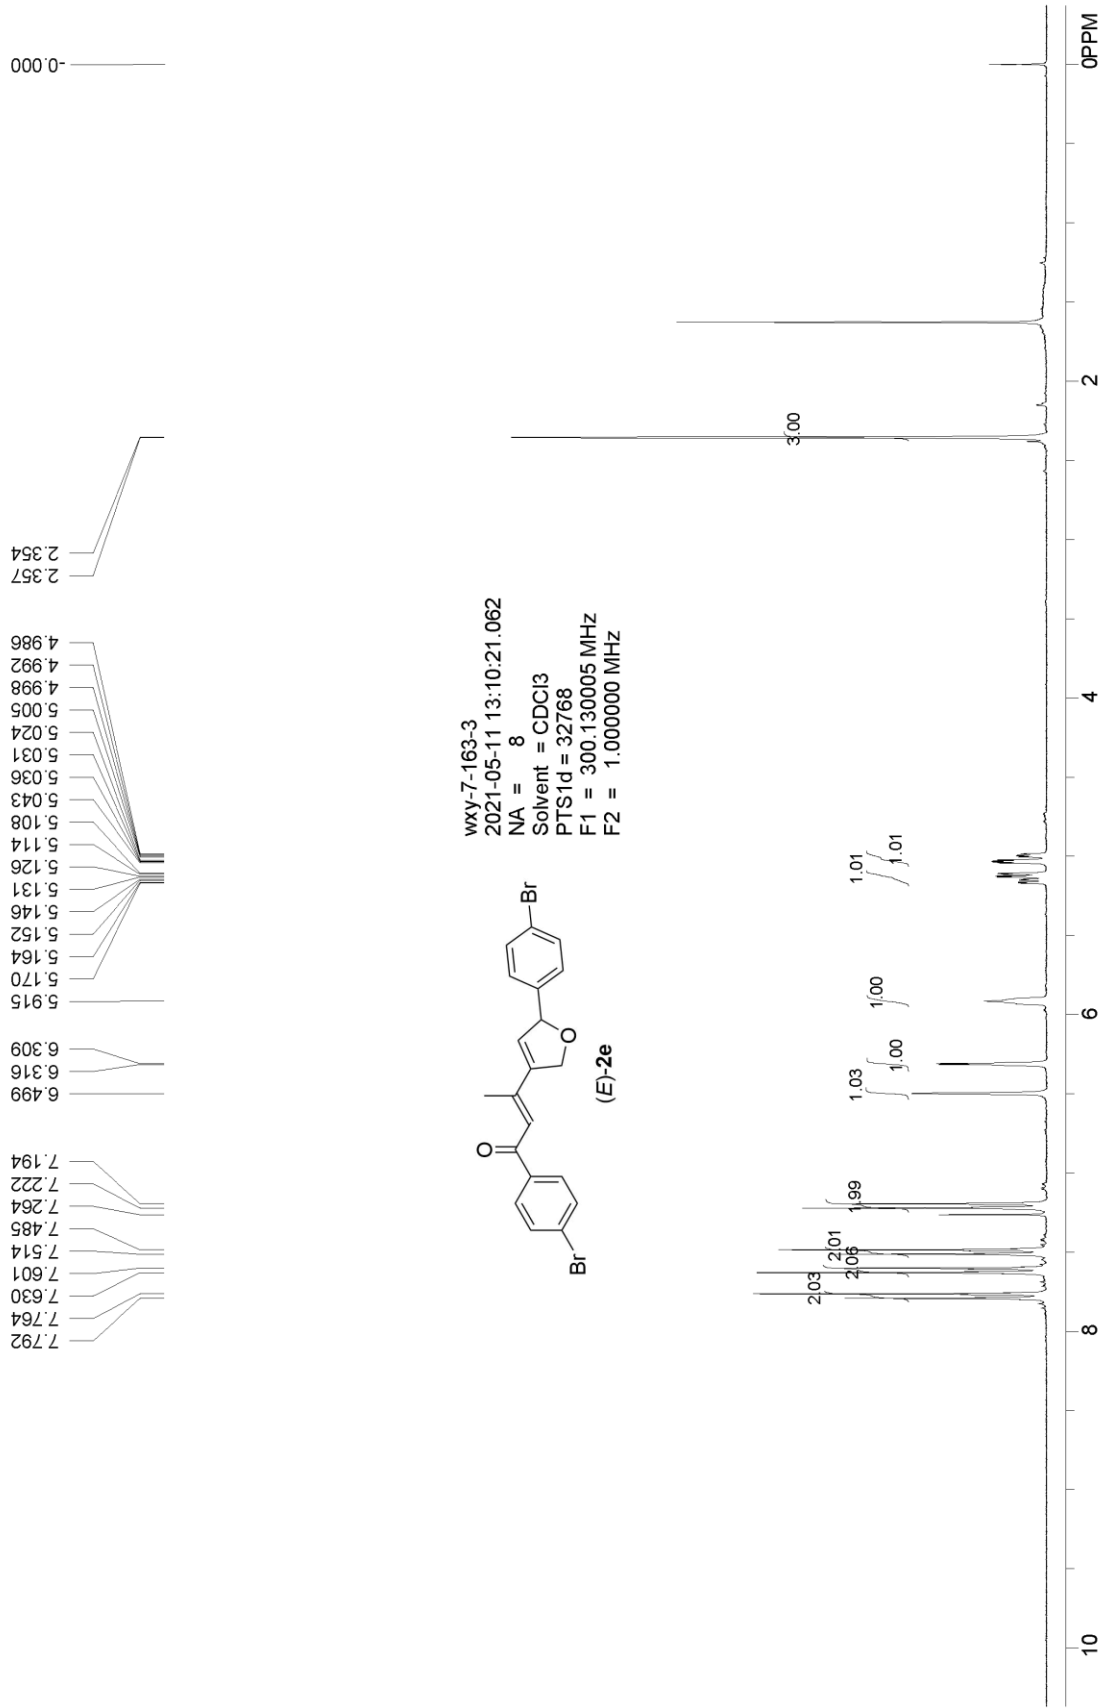

7.937  
7.933  
7.910  
7.904  
7.591  
7.567  
7.542  
7.503  
7.478  
7.455  
7.401  
7.383  
7.360  
7.346  
7.337  
7.324  
7.310  
7.288  
7.256  
6.570  
6.353  
6.348  
6.341  
6.335  
5.981  
5.964  
5.946  
5.198  
5.191  
5.180  
5.174  
5.160  
5.153  
5.142  
5.136  
5.061  
5.054  
5.049  
5.042  
5.023  
5.016  
5.011  
5.004  
2.372  
2.368

wxy-3-112  
2018-11-24 14:49:29.375  
USER: nmr  
SOLVENT: CDCl3  
Experiment = zg30  
Pulse length = 14.000 usec  
Relaxation delay = 1.000 sec  
NA = 8  
Solvent = CDCl3  
PTS1d = 32768  
F1 = 300.130005 MHz  
F2 = 1.000000 MHz  
SW1 = 6188.12 Hz

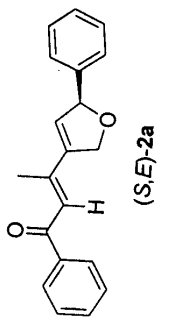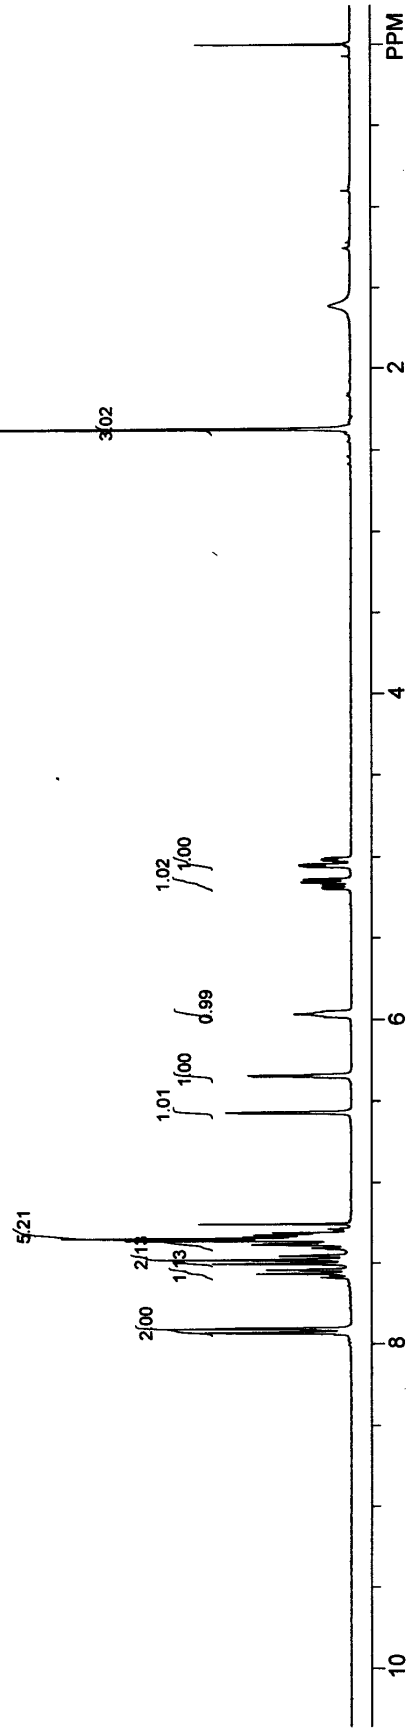

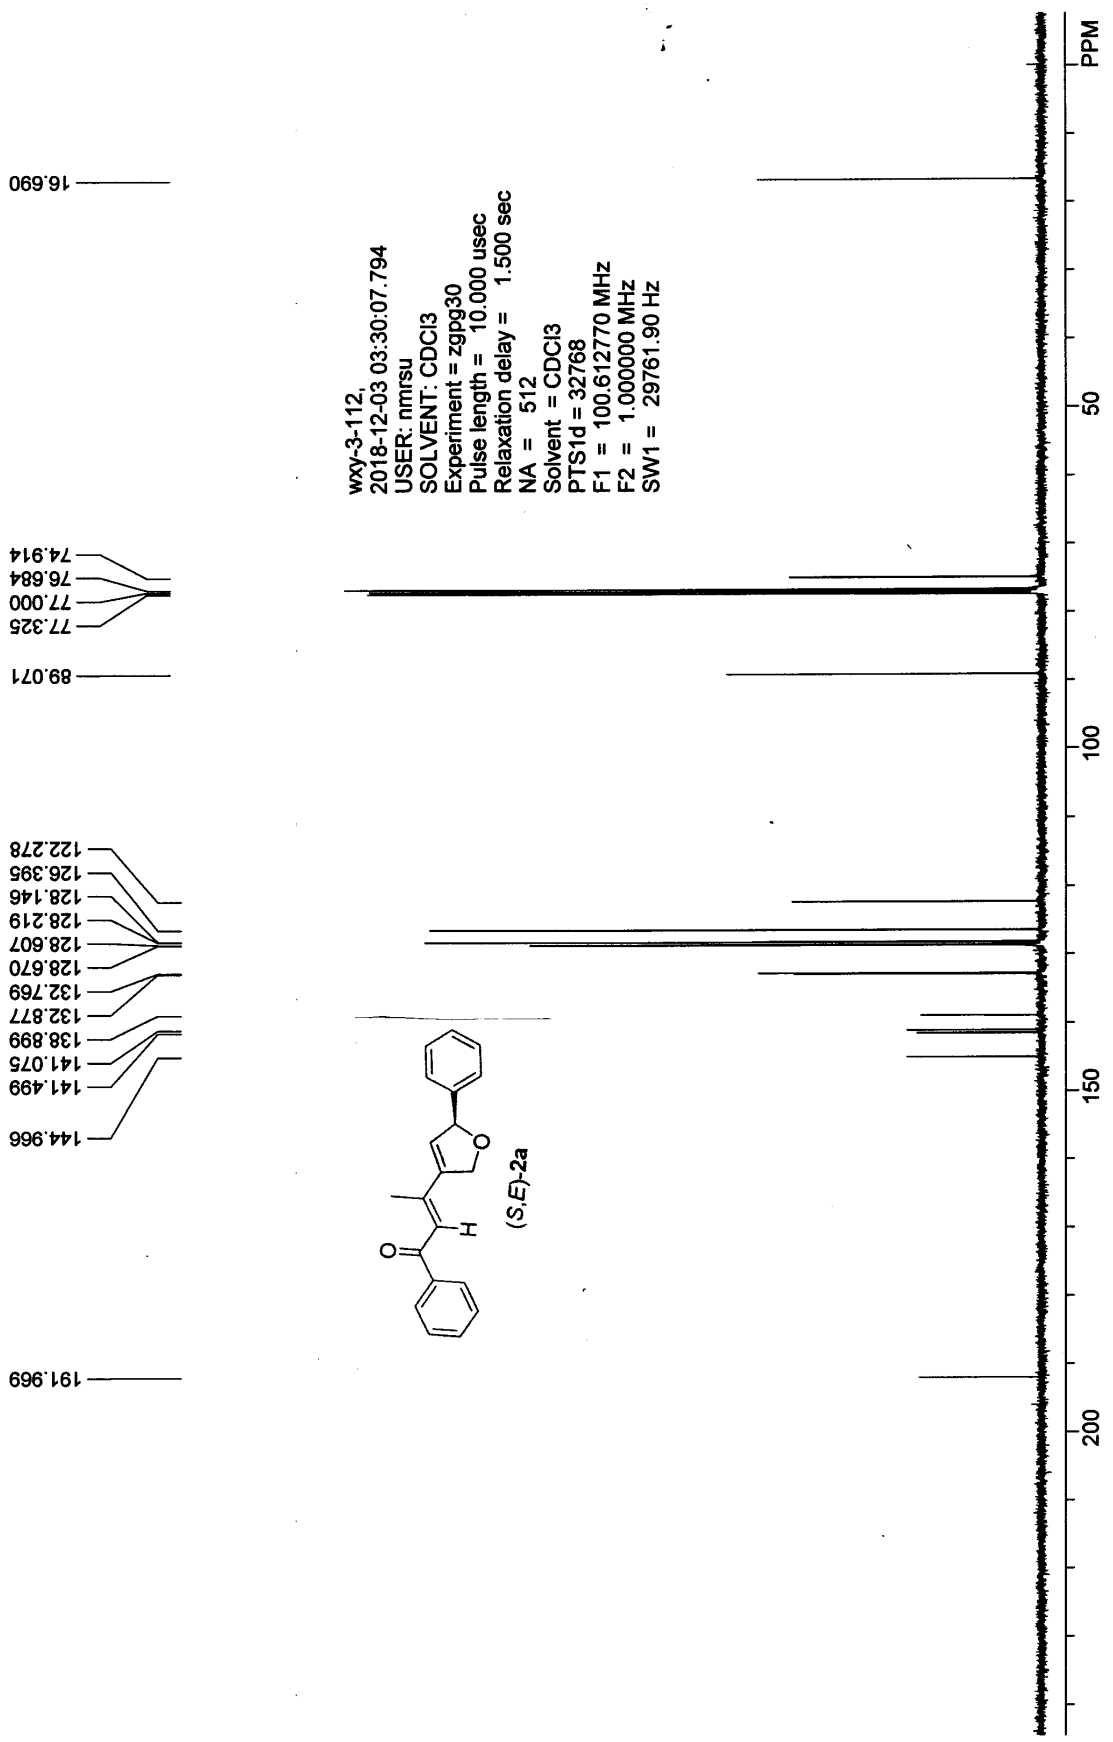

中国科学院上海有机化学研究所

Project Name: defaults for copy

Reported by User: Breeze user (Breeze)

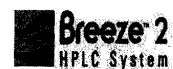

### SAMPLE INFORMATION

Sample Name: wy-3-112-ic-60-10-1-214  
Sample Type: 未知  
Vial: 999  
Injection #: 77  
Injection Volume: 10.00  $\mu$ l  
Run Time: 45.00 Minutes  
Column Type:

Acquired By: Breeze  
Date Acquired: 2018/12/7 9:48:07 CST  
Acq. Method: zg90  
Date Processed: 2018/12/7 18:05:33 CST  
Channel Name: V2489 ChA  
Channel Desc: V2489 ChA.210nm  
Sample Set Name:

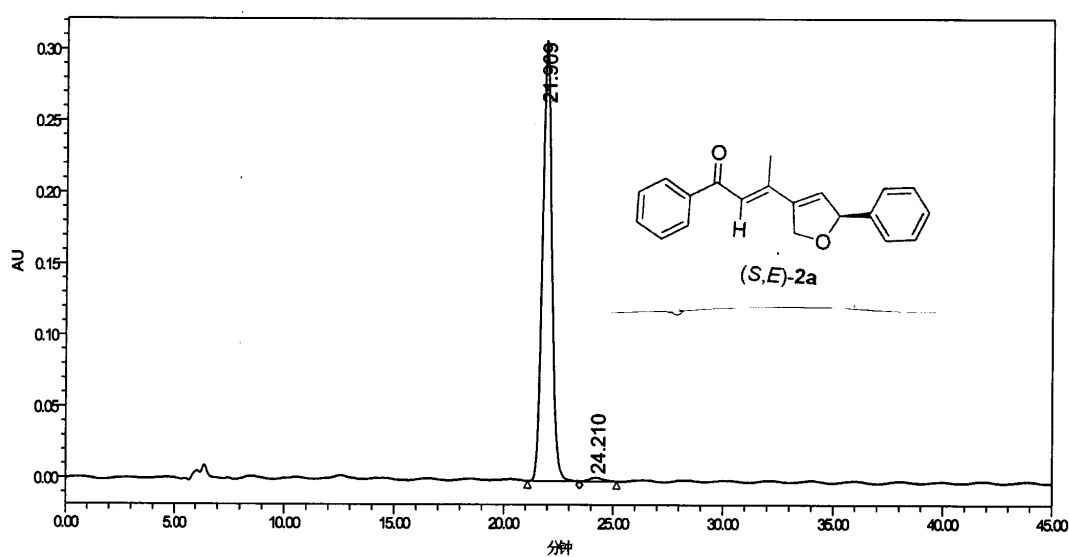

|   | RT<br>(min) | Area<br>(峰面积) | %Area | Height<br>(峰高) | %<br>Height |
|---|-------------|---------------|-------|----------------|-------------|
| 1 | 21.906      | 9180817       | 98.72 | 308271         | 99.12       |
| 2 | 24.210      | 11864         | 1.28  | 2743           | 0.88        |

中国科学院上海有机化学研究所

Project Name: defaults for copy

Reported by User: Breeze user (Breeze)

**Breeze 2**  
HPLC System

### SAMPLE INFORMATION

|                   |                         |                  |                        |
|-------------------|-------------------------|------------------|------------------------|
| Sample Name:      | hx-15-18810-90-10-1-214 | Acquired By:     | Breeze                 |
| Sample Type:      | 未知                      | Date Acquired:   | 2018/12/7 8:46:28 CST  |
| Vial:             | 999                     | Acq. Method:     | zg90                   |
| Injection#:       | 76                      | Date Processed:  | 2018/12/7 18:05:08 CST |
| Injection Volume: | 10.00 $\mu$ l           | Channel Name:    | W2489 ChA              |
| Run Time:         | 45.00 Minutes           | Channel Desc.:   | W2489 ChA.210m         |
| Column Type:      |                         | Sample Set Name: |                        |

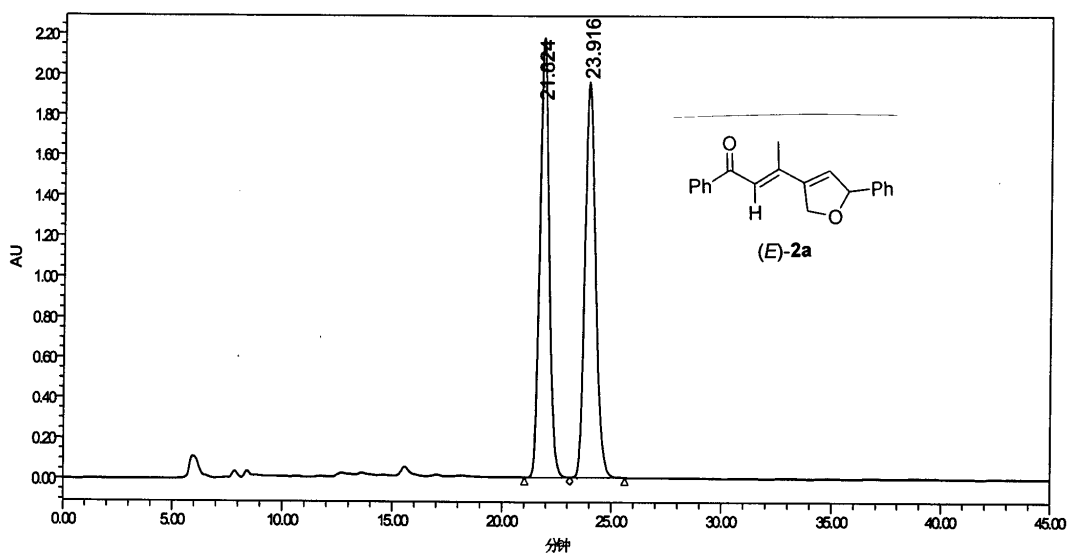

|   | RT<br>(min) | Area<br>(峰面积) | %Area | Height<br>(峰高) | %<br>Height |
|---|-------------|---------------|-------|----------------|-------------|
| 1 | 21.824      | 65882232      | 49.83 | 2174727        | 52.65       |
| 2 | 23.916      | 65338397      | 50.17 | 1955548        | 47.35       |

# fjj-1-018-Chiral

实验时间: 2018-11-22, 23:19:43  
谱图文件: D:\浙大智达\N2000\样品\S20181122231944.org  
方法文件: D:\浙大智达\N2000\djx.mtd

实验者: fjj  
报告时间: 2018-11-22, 23:39:13  
积分方法: 面积归一法

实验内容简介:  
od-H, n-hexane/i-PrOH = 95/5, 1.0, 220

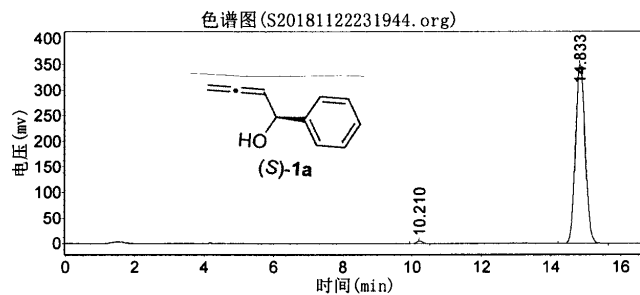

分析结果表

| 峰号 | 峰名 | 保留时间   | 峰高         | 峰面积         | 含量       |
|----|----|--------|------------|-------------|----------|
| 1  |    | 10.210 | 5387.825   | 65427.152   | 0.9580   |
| 2  |    | 14.833 | 349620.563 | 6763982.000 | 99.0420  |
| 总计 |    |        | 355008.387 | 6829409.152 | 100.0000 |



# fjj-1-018-racemic

实验时间: 2018-11-22, 22:34:30  
谱图文件: D:\浙大智达\N2000\样品\S20181122223430.org  
方法文件: D:\浙大智达\N2000\djx.mtd

实验者: ssh  
报告时间: 2018-11-22, 22:55:01  
积分方法: 面积归一法

实验内容简介:  
od-H, n-hexane/i-PrOH = 95/5, 1.0, 220

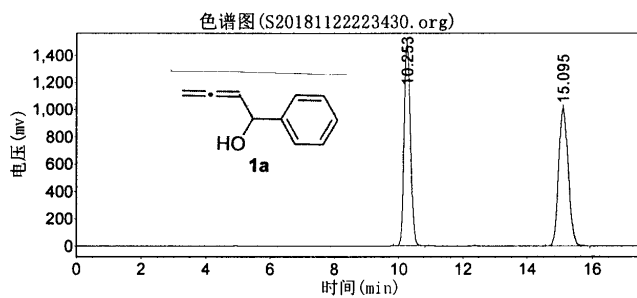

分析结果表

| 峰号 | 峰名 | 保留时间   | 峰高          | 峰面积          | 含量       |
|----|----|--------|-------------|--------------|----------|
| 1  |    | 10.253 | 1485339.625 | 20370190.000 | 49.4233  |
| 2  |    | 15.095 | 1007126.188 | 20845612.000 | 50.5767  |
| 总计 |    |        | 2492465.813 | 41215802.000 | 100.0000 |

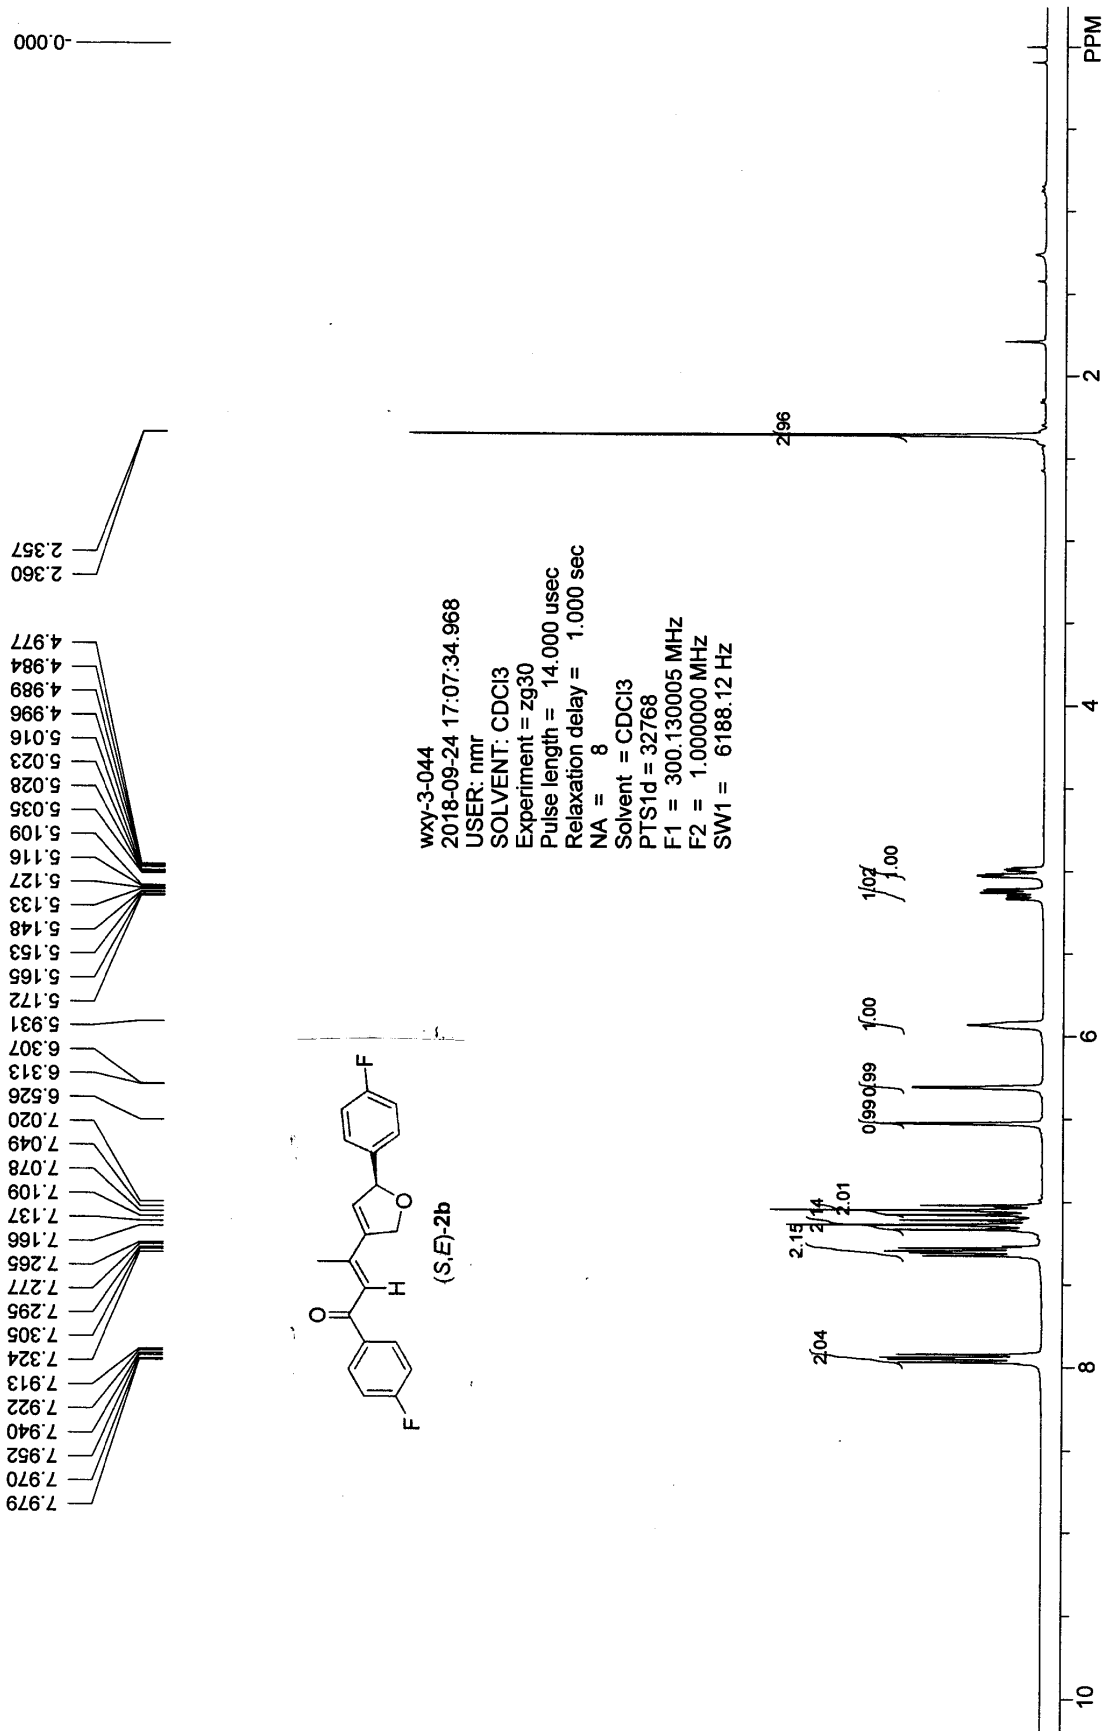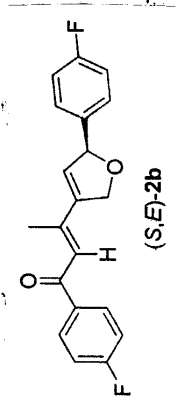



0.000

105.877  
114.408

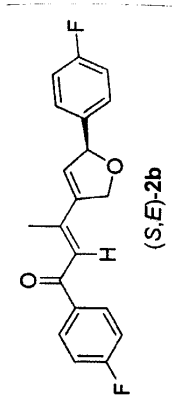

wxy-3-044  
2018-09-24 20:23:12.906  
USER: nmr  
SOLVENT: CDCl3  
Experiment = zgpg30  
Pulse length = 13.500 usec  
Relaxation delay = 1.000 sec  
NA = 16  
Solvent = CDCl3  
PTS1d = 65536  
F1 = 282.404358 MHz  
F2 = 1.000000 MHz  
SW1 = 66964.29 Hz

1.11

1.00

PPM

-150

-100

-50

0

# wxy-3-044-oz-h-90-10-1-214

实验时间: 2018-09-29, 12:33:40

报告时间: 2018-09-29, 18:19:29

谱图文件: D:\zhuguangjiong\wxy\20190929\wxy-3-044-oz-h-90-10-1-214..org

实验内容简介:

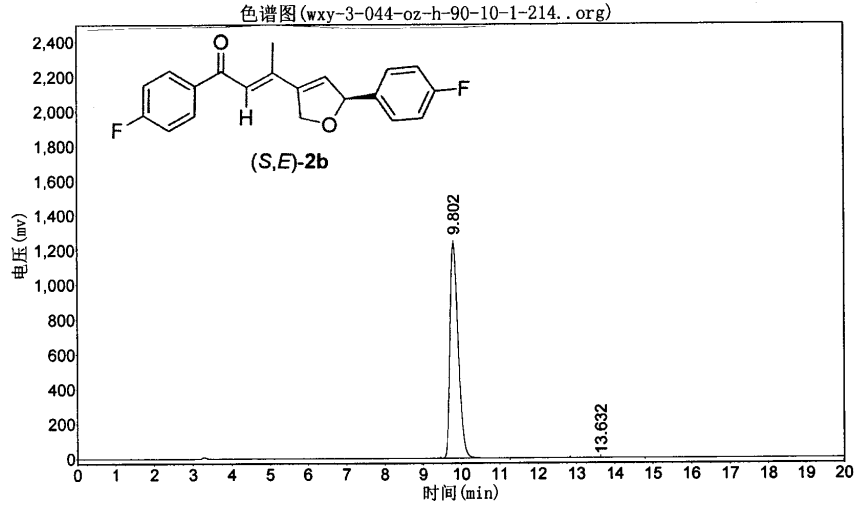

分析结果表

| 峰号 | 峰名 | 保留时间   | 峰高          | 峰面积          | 含量       |
|----|----|--------|-------------|--------------|----------|
| 1  |    | 9.802  | 1238822.125 | 18647398.000 | 99.7822  |
| 2  |    | 13.632 | 873.859     | 40696.656    | 0.2178   |
| 总计 |    |        | 1239695.984 | 18688094.656 | 100.0000 |

# wxy-1-155-oz-h-90-10-1-214

实验时间: 2018-09-29, 12:09:54

报告时间: 2018-09-29, 18:18:35

谱图文件: D:\zhuguangji\wxy\20190929\wxy-1-155-oz-h-90-10-1-214.org

实验内容简介:

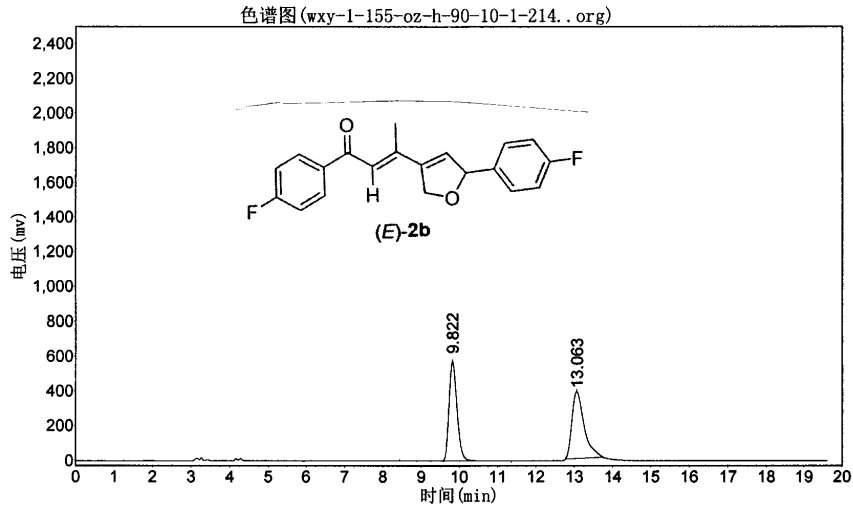

分析结果表

| 峰号 | 峰名 | 保留时间   | 峰高         | 峰面积          | 含量       |
|----|----|--------|------------|--------------|----------|
| 1  |    | 9.822  | 572089.688 | 8352689.000  | 49.6749  |
| 2  |    | 13.063 | 385279.875 | 8462007.000  | 50.3251  |
| 总计 |    |        | 957369.563 | 16814696.000 | 100.0000 |

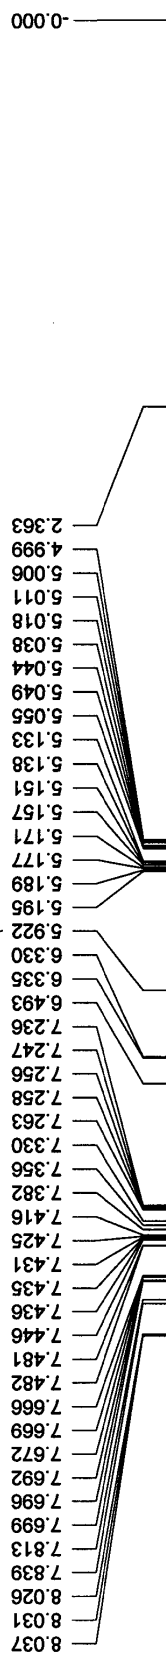

wxy-3-109  
 2018-11-22 13:45:33.250  
 USER: nmr  
 SOLVENT: CDCl3  
 Experiment = zg30  
 Pulse length = 14.000 usec  
 Relaxation delay = 1.000 sec  
 NA = 8  
 Solvent = CDCl3  
 PTS1d = 32768  
 F1 = 300.130005 MHz  
 F2 = 1.000000 MHz  
 SW1 = 6188.12 Hz

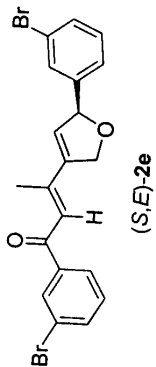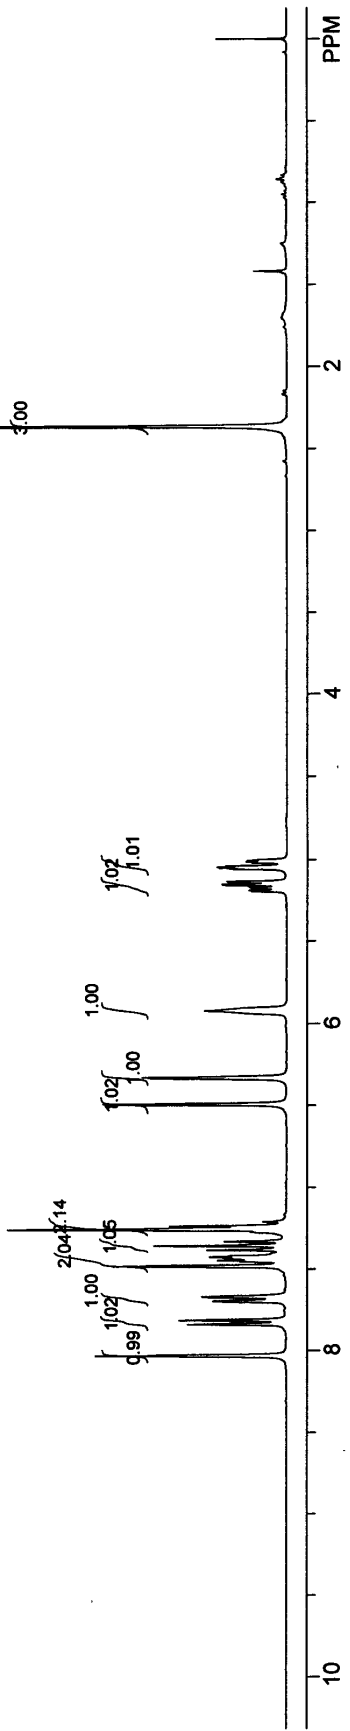

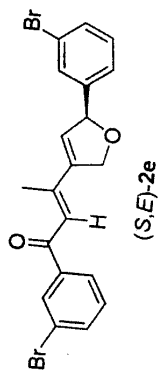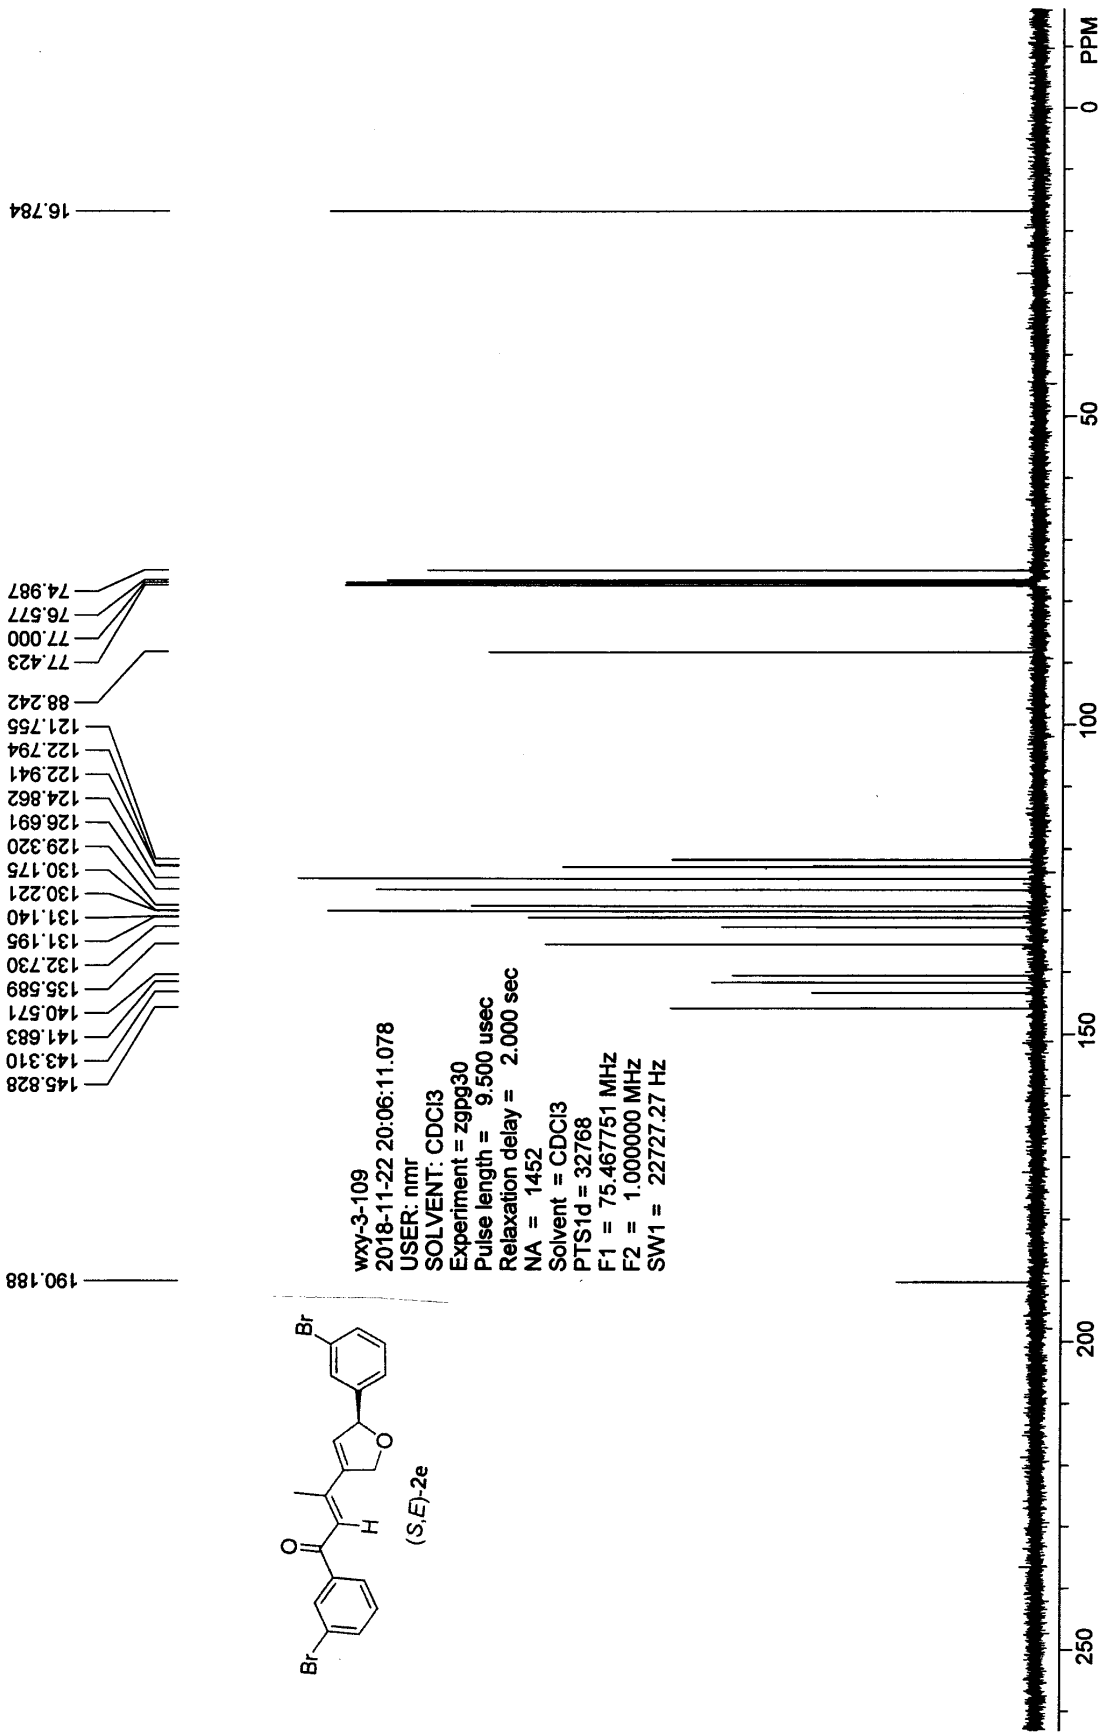



中国科学院上海有机化学研究所

Project Name: defaults for copy

Reported by User: Breeze user (Breeze)

**Breeze 2**  
HPLC System

### SAMPLE INFORMATION

|                   |                        |                  |                        |
|-------------------|------------------------|------------------|------------------------|
| Sample Name:      | wy-3-109io-60-10-1-214 | Acquired By:     | Breeze                 |
| Sample Type:      | 未知                     | Date Acquired:   | 2018/12/7 12:33:21 CST |
| Val:              | 999                    | Acq. Method:     | zg90                   |
| Injection #:      | 81                     | Date Processed:  | 2018/12/7 18:10:28 CST |
| Injection Volume: | 10.00 $\mu$ l          | Channel Name:    | V2489 ChA              |
| Run Time:         | 30.00 Minutes          | Channel Desc.:   | V2489 ChA.210m         |
| Column Type:      |                        | Sample Set Name: |                        |

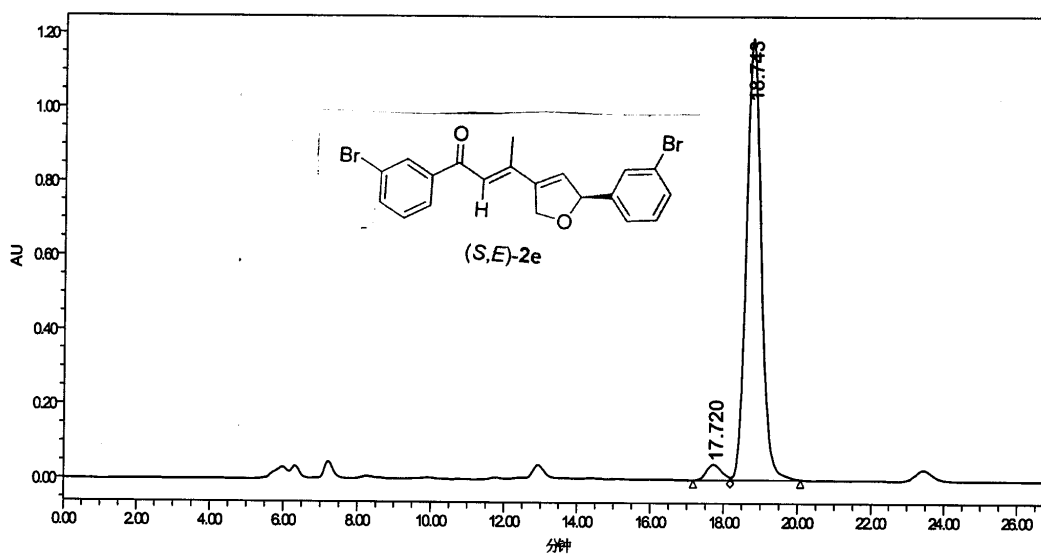

|   | RT<br>(min) | Area<br>(峰面积) | %Area | Height<br>(峰高) | %<br>Height |
|---|-------------|---------------|-------|----------------|-------------|
| 1 | 17.720      | 1221580       | 3.5%  | 41994          | 3.41        |
| 2 | 18.743      | 33232016      | 96.4% | 1187117        | 96.59       |

中国科学院上海有机化学研究所

Project Name defaults for copy

Reported by User: Breeze user (Breeze)

**Breeze 2**  
HPLC System

### SAMPLE INFORMATION

|                   |                         |                  |                        |
|-------------------|-------------------------|------------------|------------------------|
| Sample Name:      | wxy-1-192ic-90-10-1-214 | Acquired By:     | Breeze                 |
| Sample Type:      | 未知                      | Date Acquired:   | 2018/12/7 10:36:57 CST |
| Val:              | 999                     | Acq. Method:     | zg90                   |
| Injection#:       | 78                      | Date Processed:  | 2018/12/7 18:08:22 CST |
| Injection Volume: | 10.00 $\mu$             | Channel Name:    | V2489 ChA              |
| Run Time:         | 45.00 Minutes           | Channel Desc.:   | V2489 ChA 210m         |
| Column Type:      |                         | Sample Set Name: |                        |

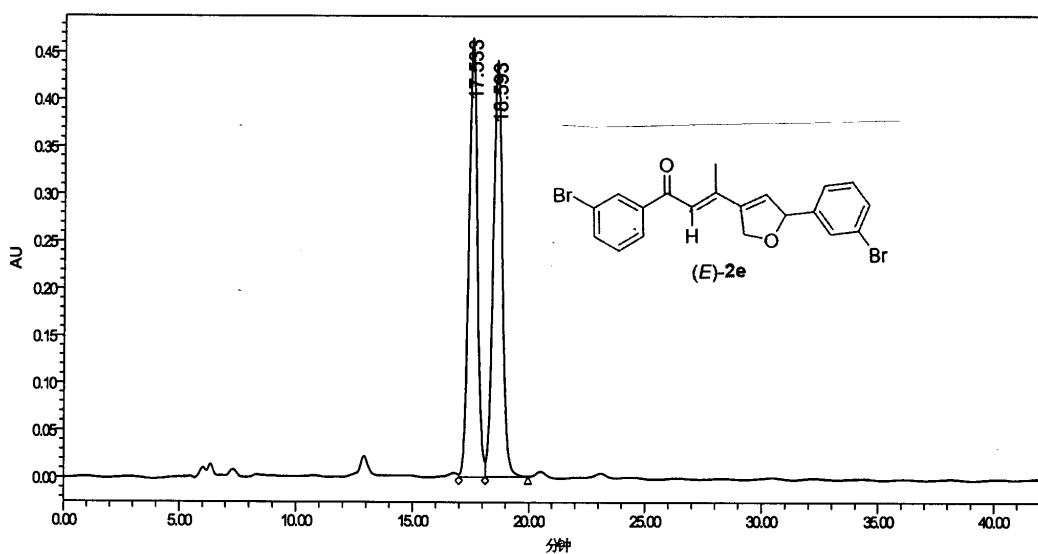

|   | RT<br>(min) | Area<br>(峰面积) | %Area | Height<br>(峰高) | %<br>Height |
|---|-------------|---------------|-------|----------------|-------------|
| 1 | 17.533      | 1188379E      | 49.62 | 46400E         | 51.31       |
| 2 | 18.583      | 12077161      | 50.38 | 440304         | 48.69       |



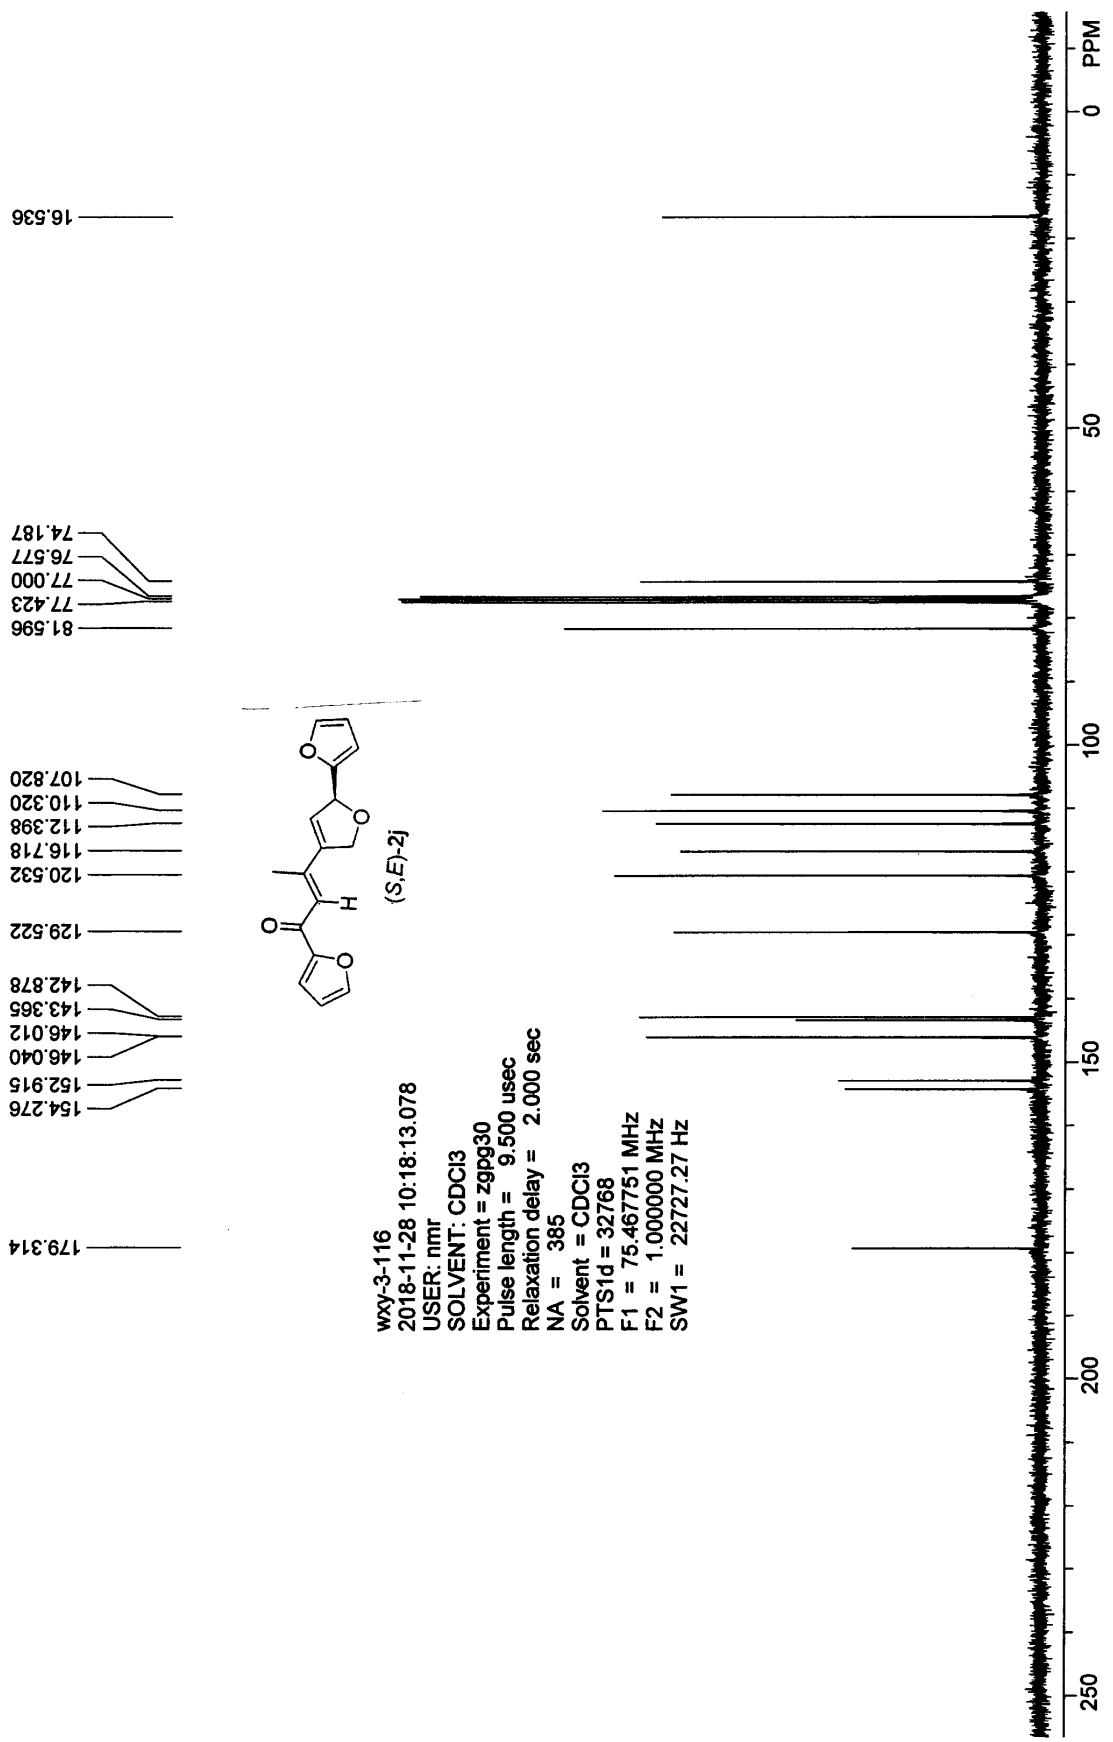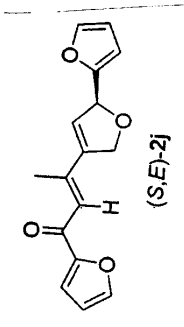

wxy-3-116  
 2018-11-28 10:18:13.078  
 USER: nmr  
 SOLVENT: CDCl3  
 Experiment = zgpg30  
 Pulse length = 9.500 usec  
 Relaxation delay = 2.000 sec  
 NA = 385  
 Solvent = CDCl3  
 PTS1d = 32768  
 F1 = 75.467751 MHz  
 F2 = 1.000000 MHz  
 SW1 = 22727.27 Hz

# wxy-3-116-Chiral

实验时间: 2018-11-28, 20:45:44  
谱图文件: D:\浙大智达\N2000\样品\S20181128204544.org  
方法文件: D:\浙大智达\N2000\djx.mtd

实验者: wxy  
报告时间: 2018-12-03, 15:55:04  
积分方法: 面积归一法

实验内容简介:  
od-H, n-hexane/i-PrOH = 85/15, 1.0, 220

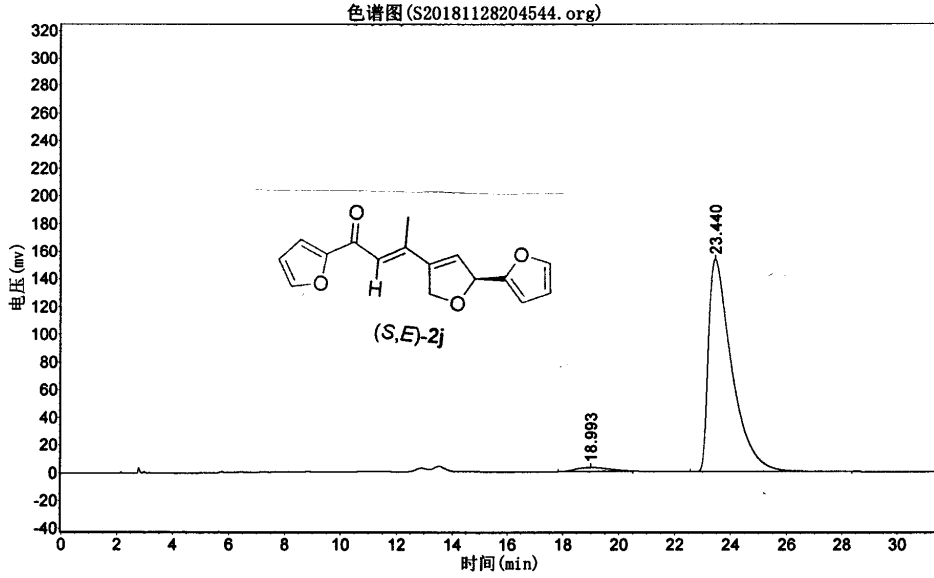

分析结果表

| 峰号 | 峰名 | 保留时间   | 峰高         | 峰面积         | 含量       |
|----|----|--------|------------|-------------|----------|
| 1  |    | 18.993 | 2841.981   | 232215.250  | 2.5592   |
| 2  |    | 23.440 | 153313.500 | 8841646.000 | 97.4408  |
| 总计 |    |        | 156155.481 | 9073861.250 | 100.0000 |

# wxy-3-116-racemic

实验时间: 2018-11-28, 21:24:12  
谱图文件: D:\浙大智达\N2000\样品\S20181128212412.org  
方法文件: D:\浙大智达\N2000\djx.mtd

实验者: wxy  
报告时间: 2018-11-28, 22:46:15  
积分方法: 面积归一法

实验内容简介:  
od-H, n-hexane/i-PrOH = 85/15, 1.0, 220

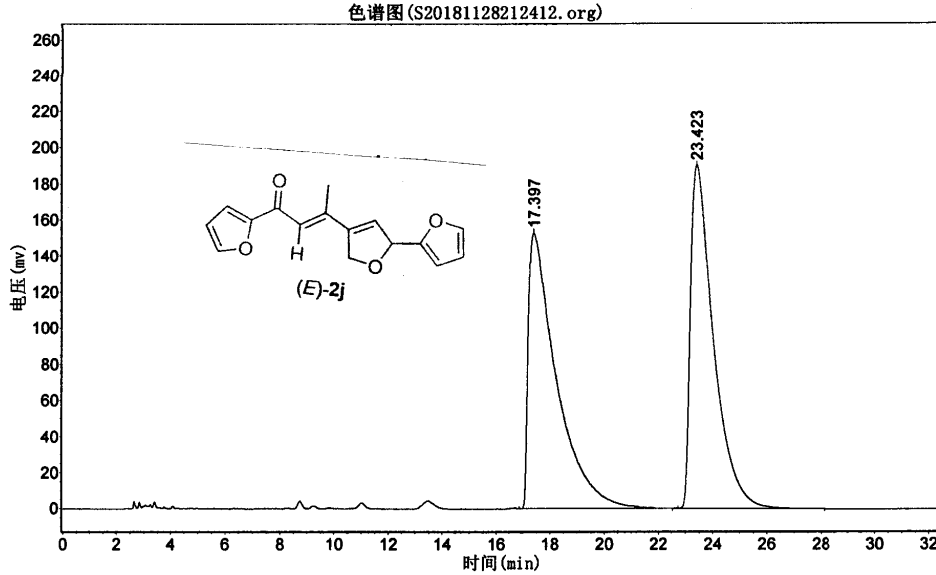

分析结果表

| 峰号 | 峰名 | 保留时间   | 峰高         | 峰面积          | 含量       |
|----|----|--------|------------|--------------|----------|
| 1  |    | 17.397 | 152830.547 | 10991313.000 | 49.6236  |
| 2  |    | 23.423 | 190313.594 | 11158053.000 | 50.3764  |
| 总计 |    |        | 343144.141 | 22149366.000 | 100.0000 |



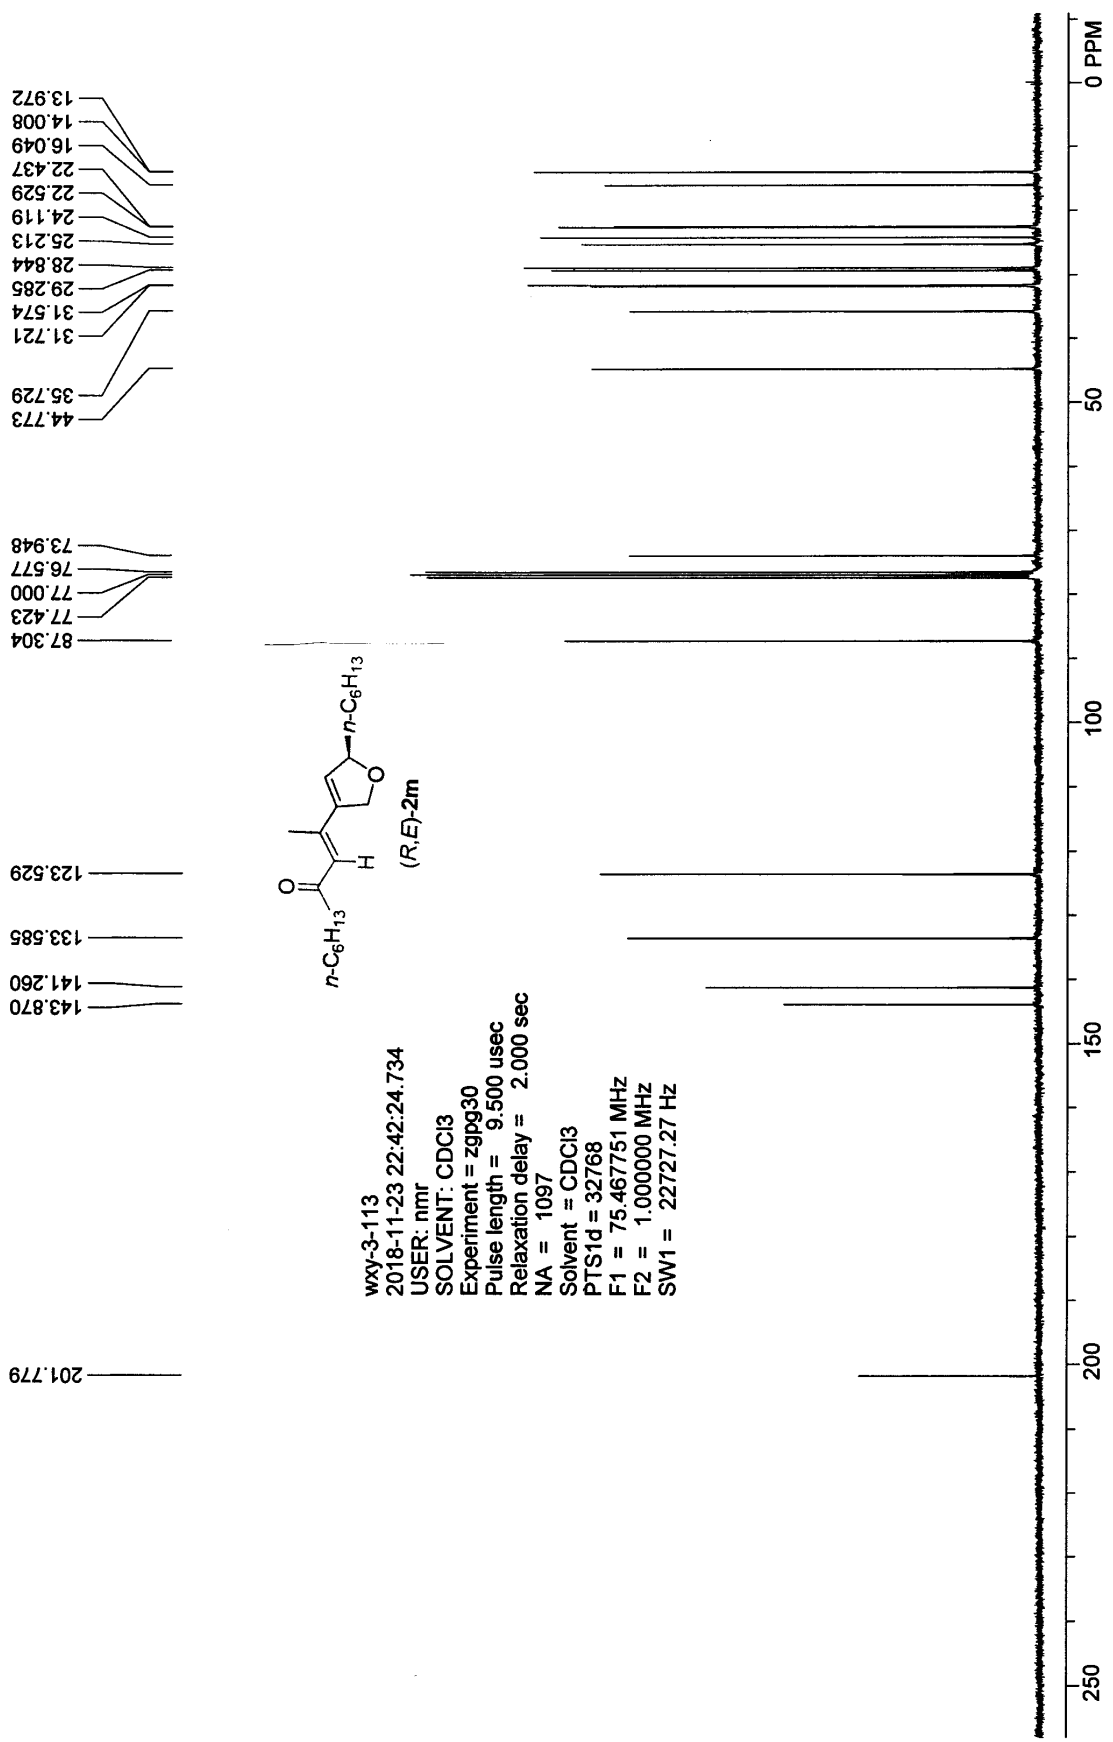



# wxy-3-113-chiral

实验时间: 2018-11-27, 16:49:56  
谱图文件: D:\浙大智达\N2000\样品\S20181127164956.org  
方法文件: D:\浙大智达\N2000\djx.mtd

实验者: wxy  
报告时间: 2018-11-27, 21:42:53  
积分方法: 面积归一法

实验内容简介:  
IC, n-hexane/i-PrOH = 99/1, 1.0, 220

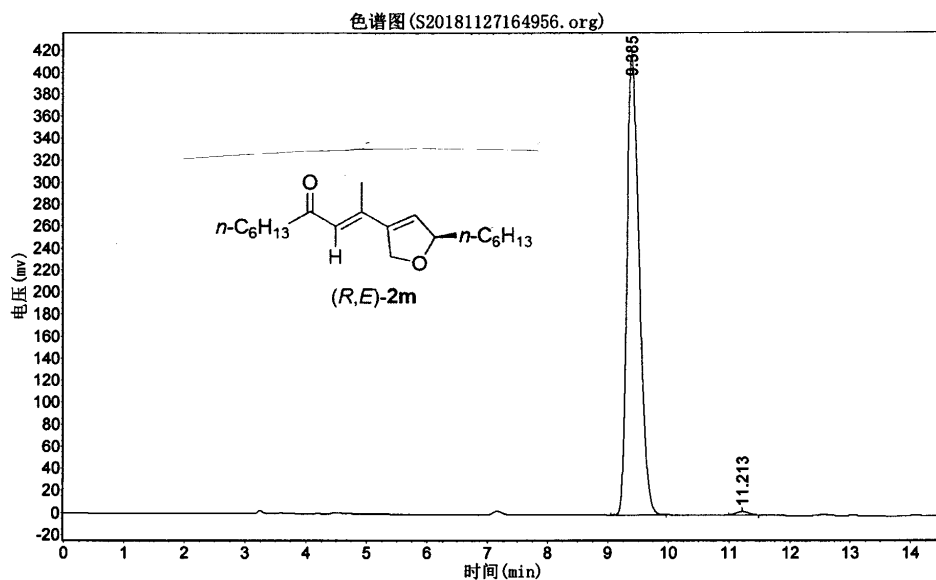

分析结果表

| 峰号 | 峰名 | 保留时间   | 峰高         | 峰面积         | 含量       |
|----|----|--------|------------|-------------|----------|
| 1  |    | 9.385  | 417135.250 | 5857646.000 | 99.1850  |
| 2  |    | 11.213 | 3373.337   | 48129.504   | 0.8150   |
| 总计 |    |        | 420508.587 | 5905775.504 | 100.0000 |

# wxy-3-113-racemic

实验时间: 2018-11-27, 21:21:45  
 谱图文件: D:\浙大智达\N2000\样品\S20181127212145.org  
 方法文件: D:\浙大智达\N2000\djx.mtd

实验者: wxy  
 报告时间: 2018-11-27, 21:40:13  
 积分方法: 面积归一法

实验内容简介:  
 IC, n-hexane/i-PrOH = 99/1, 1.0, 220

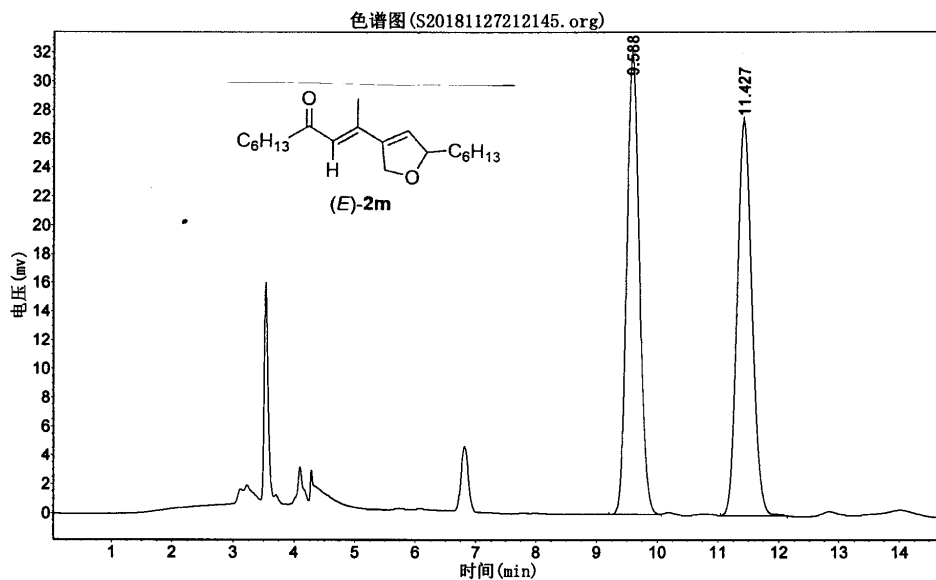

分析结果表

| 峰号 | 峰名 | 保留时间   | 峰高        | 峰面积        | 含量       |
|----|----|--------|-----------|------------|----------|
| 1  |    | 9.588  | 31870.615 | 462511.313 | 50.1733  |
| 2  |    | 11.427 | 27356.883 | 459315.875 | 49.8267  |
| 总计 |    |        | 59227.498 | 921827.188 | 100.0000 |

# fjj-1-016-chiral

实验时间: 2018-11-22, 20:09:40  
 谱图文件: D:\浙大智达\N2000\样品\S20181122200940.org  
 方法文件: D:\浙大智达\N2000\djx.mtd

实验者: wxy  
 报告时间: 2018-11-22, 23:03:32  
 积分方法: 面积归一法

实验内容简介:  
 od-H, n-hexane/i-PrOH = 90/10, 0.7, 220

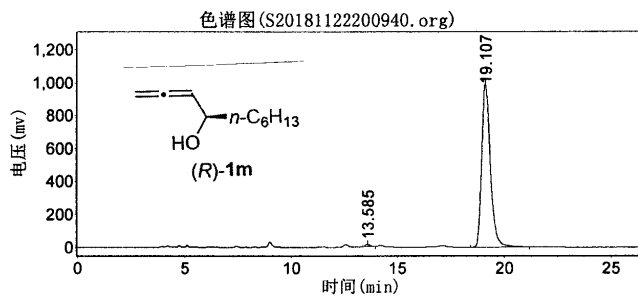

分析结果表

| 峰号 | 峰名 | 保留时间   | 峰高          | 峰面积          | 含量       |
|----|----|--------|-------------|--------------|----------|
| 1  |    | 13.585 | 14308.385   | 224406.656   | 0.7979   |
| 2  |    | 19.107 | 993045.313  | 27898604.000 | 99.2021  |
| 总计 |    |        | 1007353.697 | 28123010.656 | 100.0000 |

# fjj-1-016-racemic

实验时间: 2018-11-22, 21:29:50  
 谱图文件: D:\浙大智达\N2000\样品\S20181122212950.org  
 方法文件: D:\浙大智达\N2000\djx.mtd

实验者: fjj  
 报告时间: 2018-11-22, 22:58:33  
 积分方法: 面积归一法

实验内容简介:  
 od-H, n-hexane/i-PrOH = 90/10, 0.7, 220

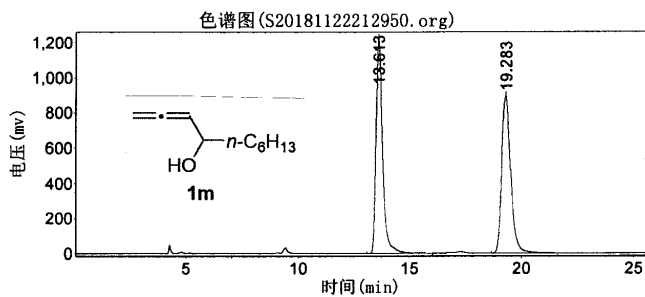

分析结果表

| 峰号 | 峰名 | 保留时间   | 峰高          | 峰面积          | 含量       |
|----|----|--------|-------------|--------------|----------|
| 1  |    | 13.613 | 1225907.500 | 25309176.000 | 49.9859  |
| 2  |    | 19.283 | 895078.813  | 25323422.000 | 50.0141  |
| 总计 |    |        | 2120986.313 | 50632598.000 | 100.0000 |

wxy-3-043  
 2018-09-23 15:30:38.187  
 USER: nmr  
 SOLVENT: CDCl3  
 Experiment = zg30  
 Pulse length = 14.000 usec  
 Relaxation delay = 1.000 sec  
 NA = 8  
 Solvent = CDCl3  
 PTD1d = 32768  
 F1 = 300.130005 MHz  
 F2 = 1.000000 MHz  
 SW1 = 6188.12 Hz

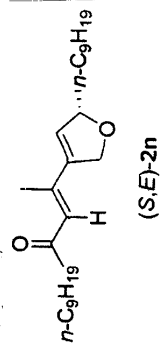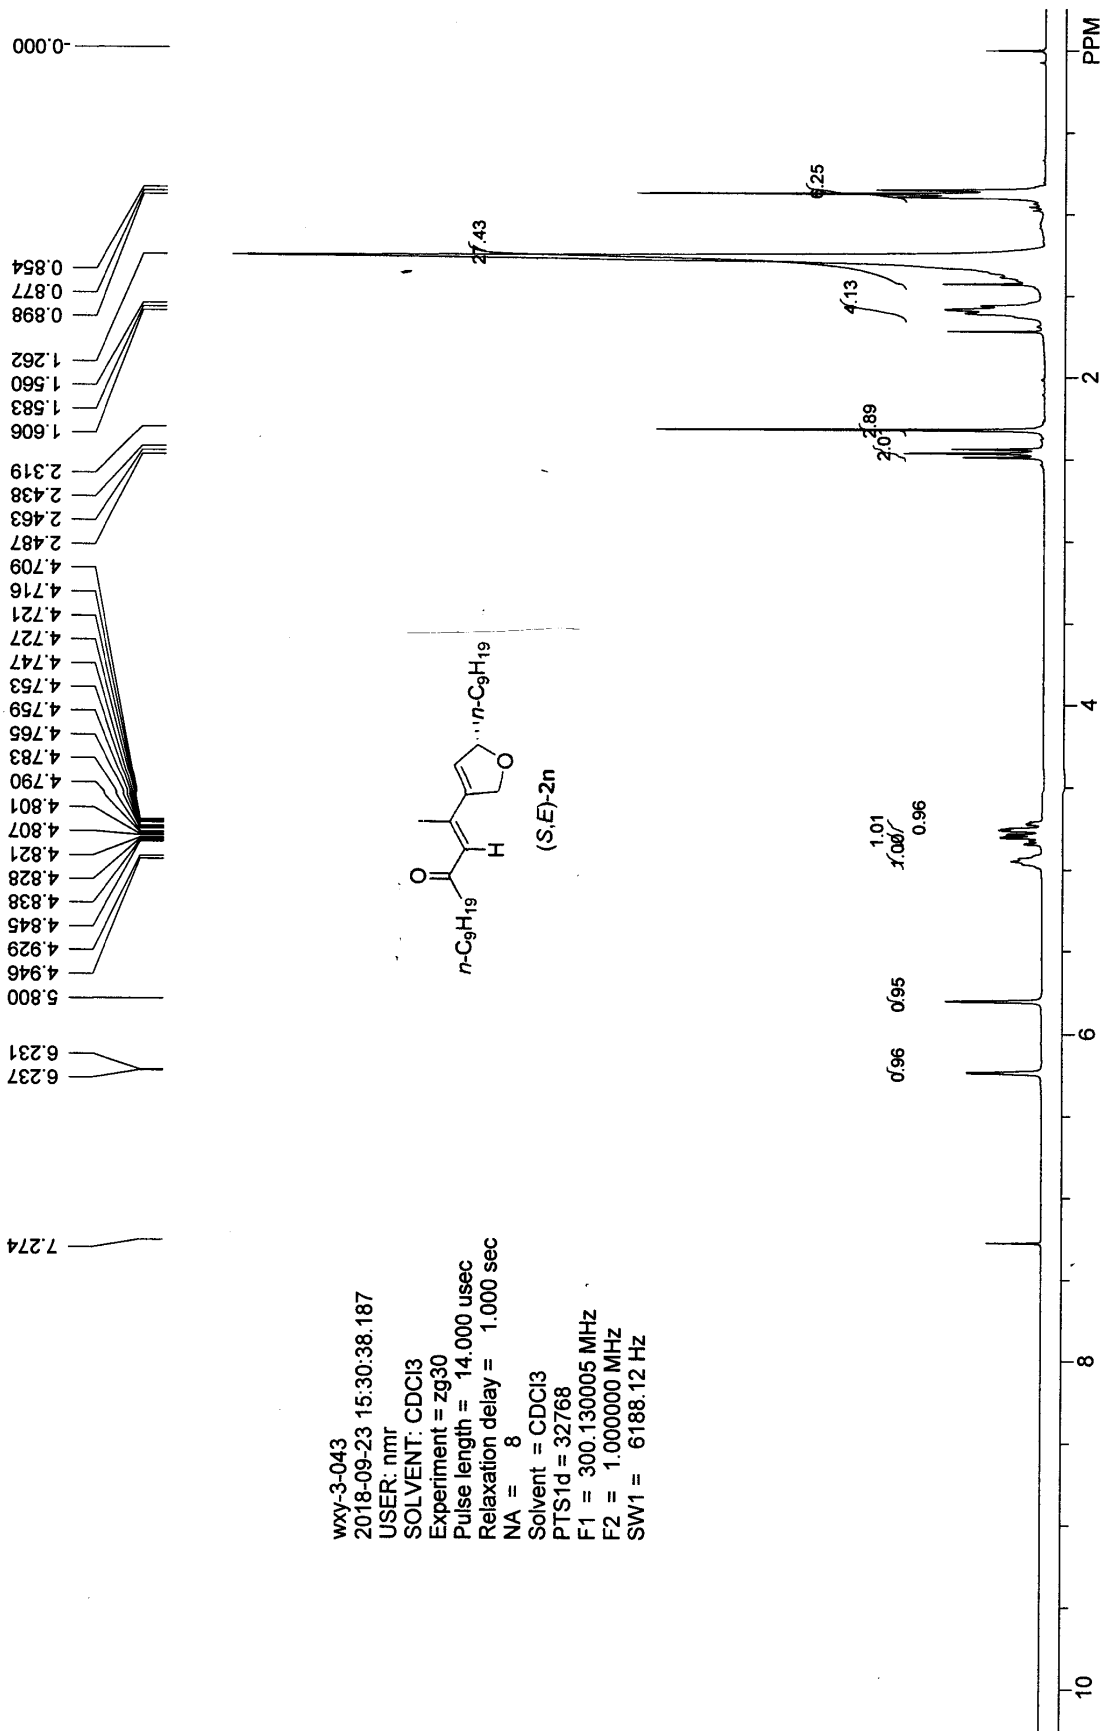

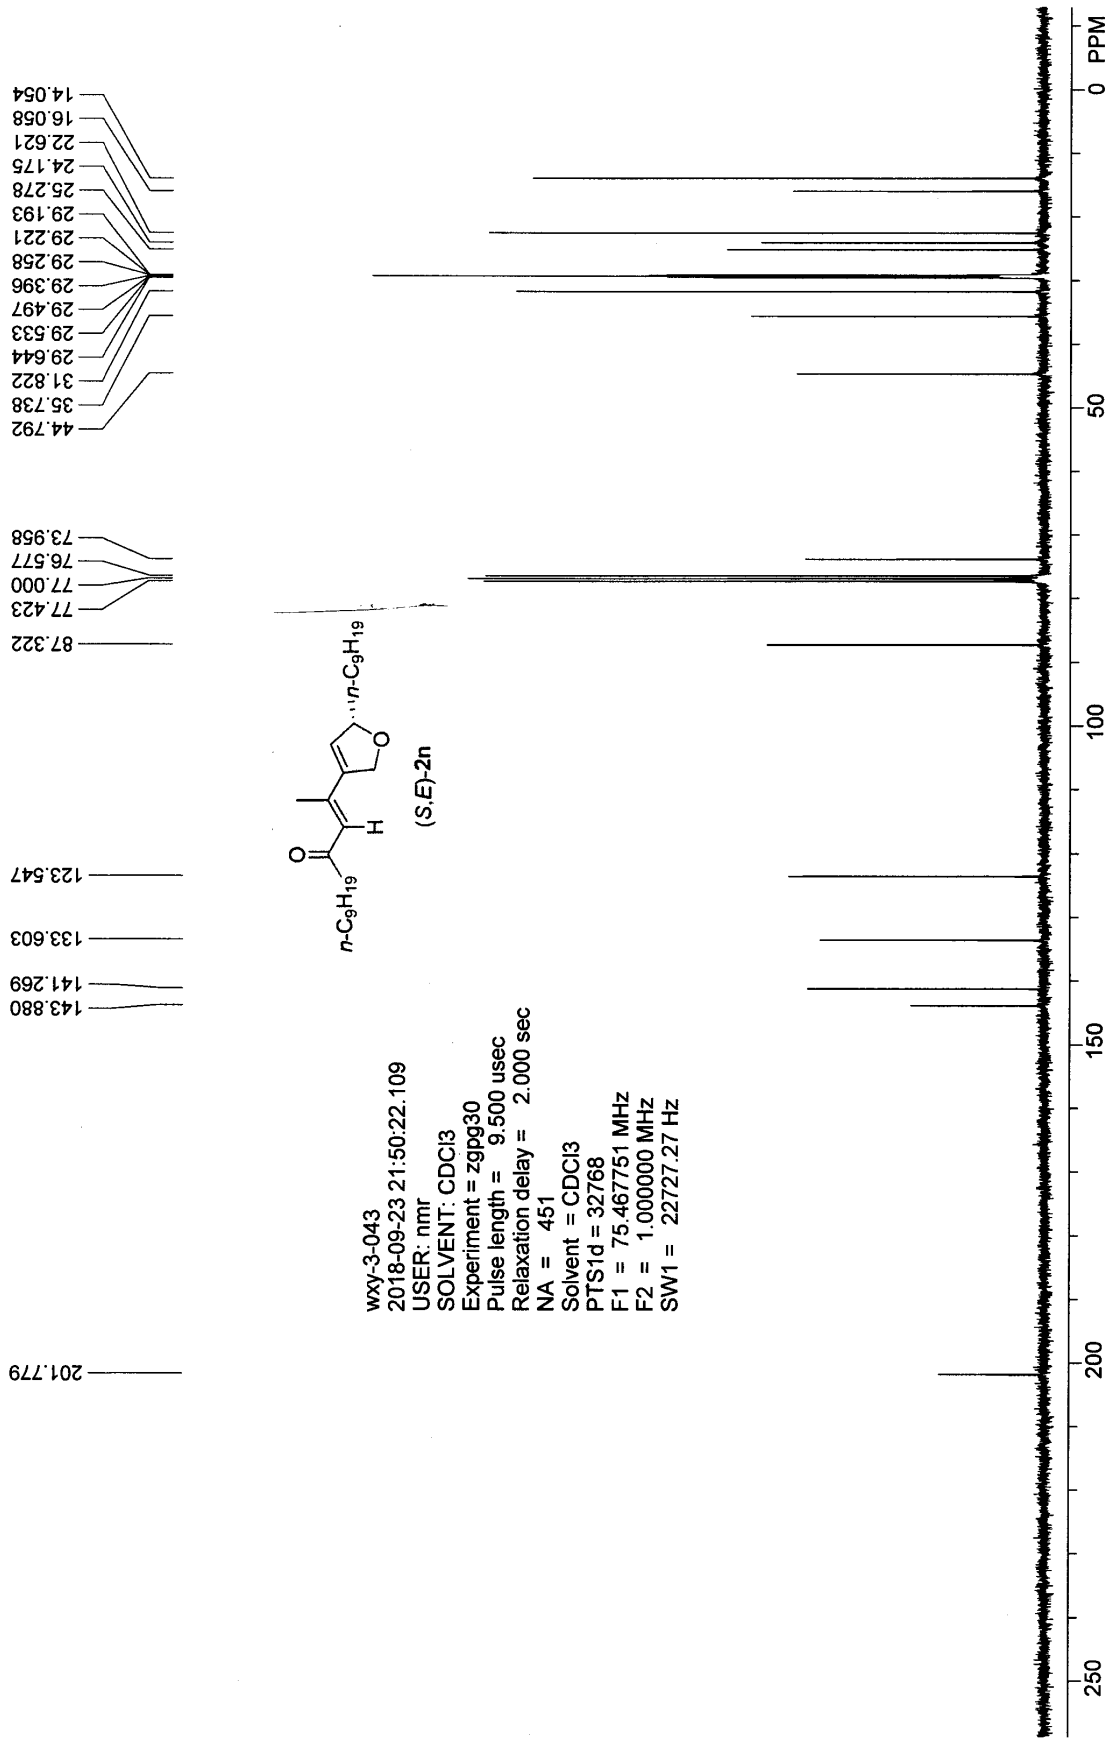

wxy-3-043  
 2018-09-23 21:50:22.109  
 USER: nmr  
 SOLVENT: CDCl3  
 Experiment = zgpg30  
 Pulse length = 9.500 usec  
 Relaxation delay = 2.000 sec  
 NA = 451  
 Solvent = CDCl3  
 PTS1d = 32768  
 F1 = 75.467751 MHz  
 F2 = 1.000000 MHz  
 SW1 = 22727.27 Hz

# wxy-3-043-chiral

实验时间: 2018-10-03, 11:50:38  
 谱图文件: D:\浙大智达\N2000\样品\S20181003115038.org  
 方法文件: D:\浙大智达\N2000\djx.mtd

实验者: wxy  
 报告时间: 2018-10-19, 19:56:54  
 积分方法: 面积归一法

实验内容简介:  
 IC, n-hexane/i-PrOH = 99/1, 0.7, 254

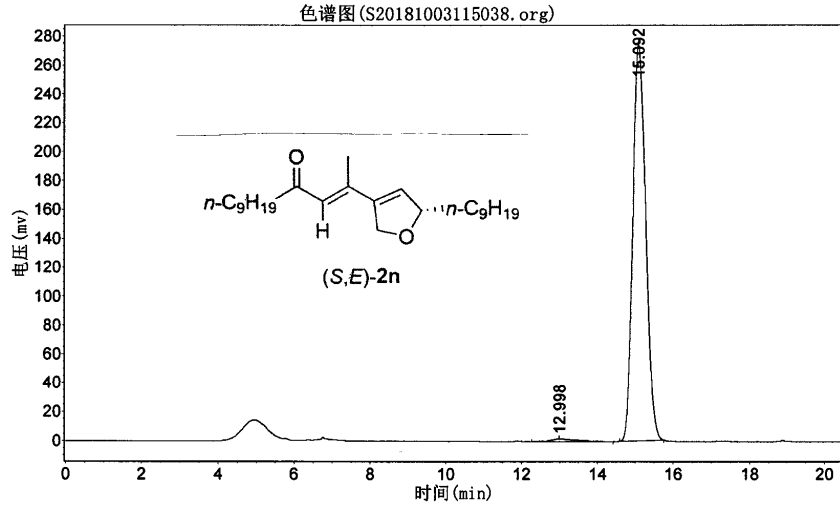

分析结果表

| 峰号 | 峰名 | 保留时间   | 峰高         | 峰面积         | 含量       |
|----|----|--------|------------|-------------|----------|
| 1  |    | 12.998 | 1624.292   | 73424.297   | 1.1237   |
| 2  |    | 15.092 | 274093.281 | 6460805.500 | 98.8763  |
| 总计 |    |        | 275717.573 | 6534229.797 | 100.0000 |

# wxy-3-041-racemic

实验时间: 2018-10-03, 10:49:34  
 谱图文件: D:\浙大智达\N2000\样品\S20181003104934.org  
 方法文件: D:\浙大智达\N2000\djx.mtd

实验者: wxy  
 报告时间: 2018-10-03, 11:32:28  
 积分方法: 面积归一法

实验内容简介:  
 IC, n-hexane/i-PrOH = 99/1, 0.7, 254

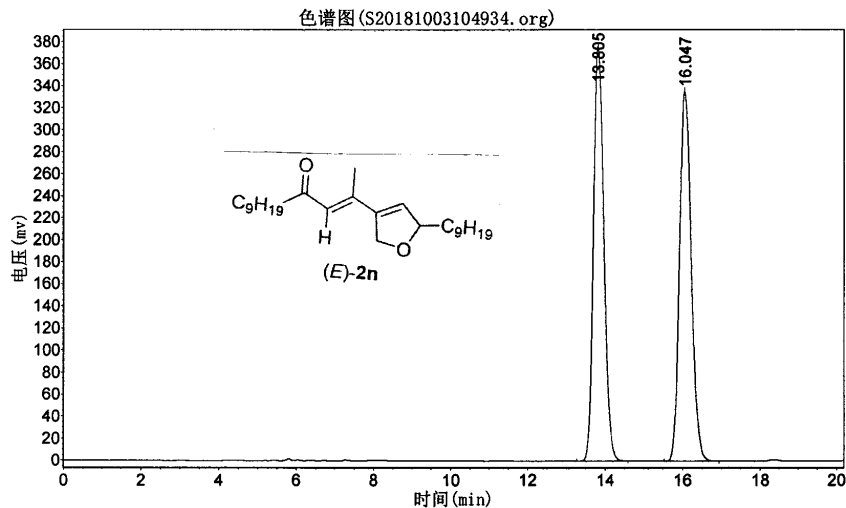

分析结果表

| 峰号 | 峰名 | 保留时间   | 峰高         | 峰面积          | 含量       |
|----|----|--------|------------|--------------|----------|
| 1  |    | 13.805 | 376373.594 | 7049943.500  | 50.0617  |
| 2  |    | 16.047 | 335684.969 | 7032569.500  | 49.9383  |
| 总计 |    |        | 712058.563 | 14082513.000 | 100.0000 |



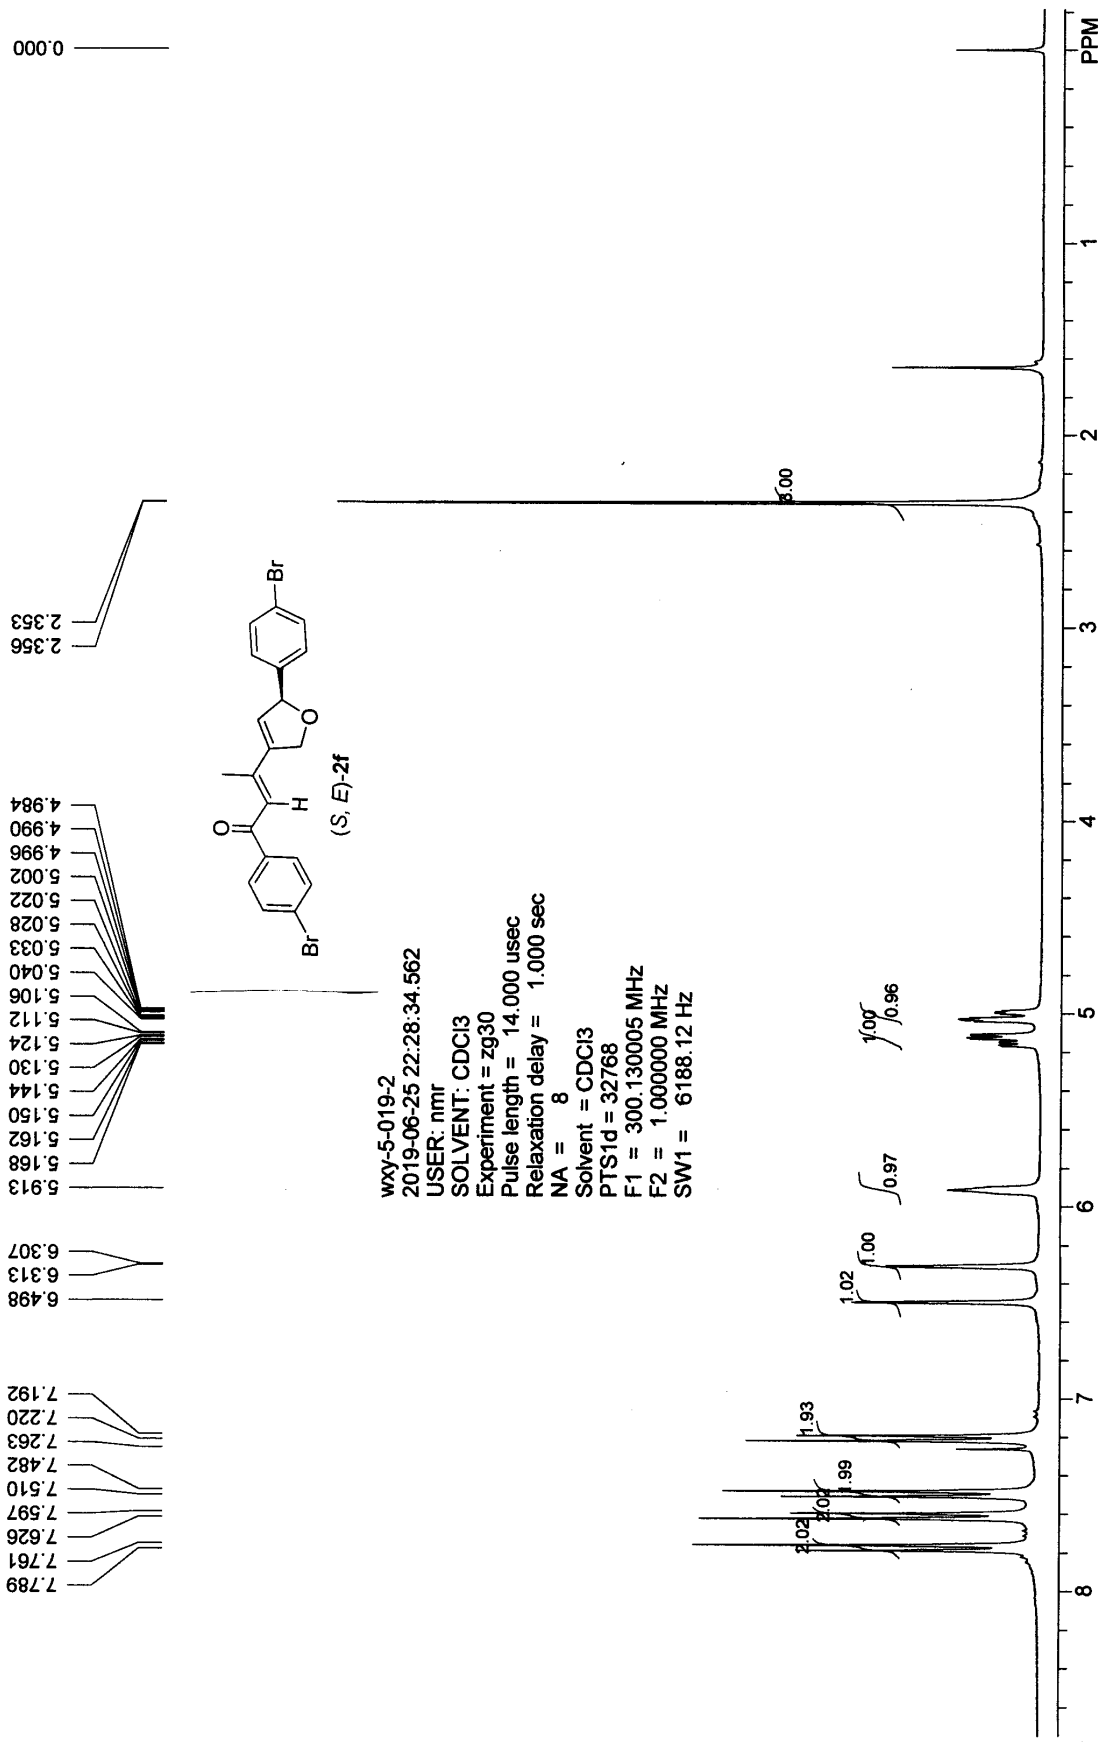

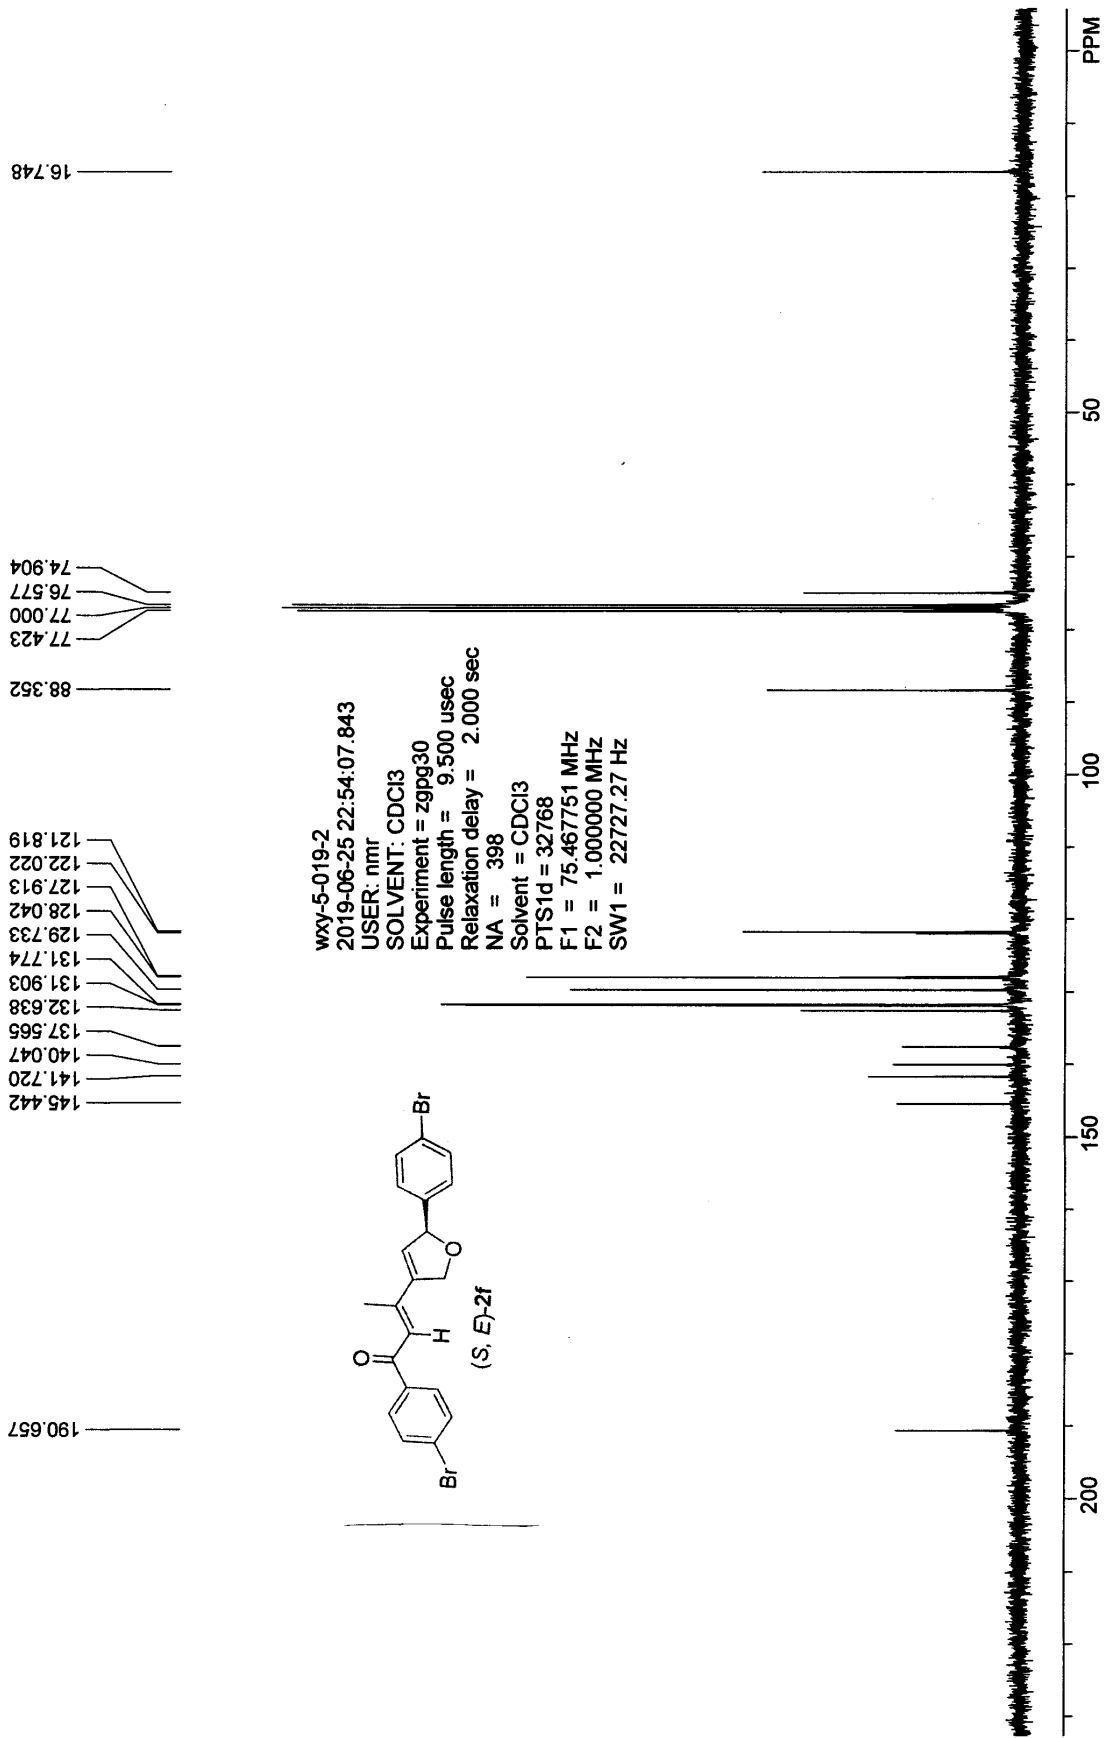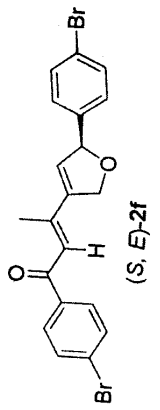

# wxy-5-019(Chiral)

实验时间: 2019-06-25, 15:39:56  
谱图文件: D:\浙大智达\N2000\样品\S20190625153956.org  
方法文件: D:\浙大智达\N2000\djx.mtd

实验者: wxy  
报告时间: 2019-06-25, 16:09:57  
积分方法: 面积归一法

实验内容简介:  
IC, n-hexane/i-PrOH = 90/10, 0.8, 254

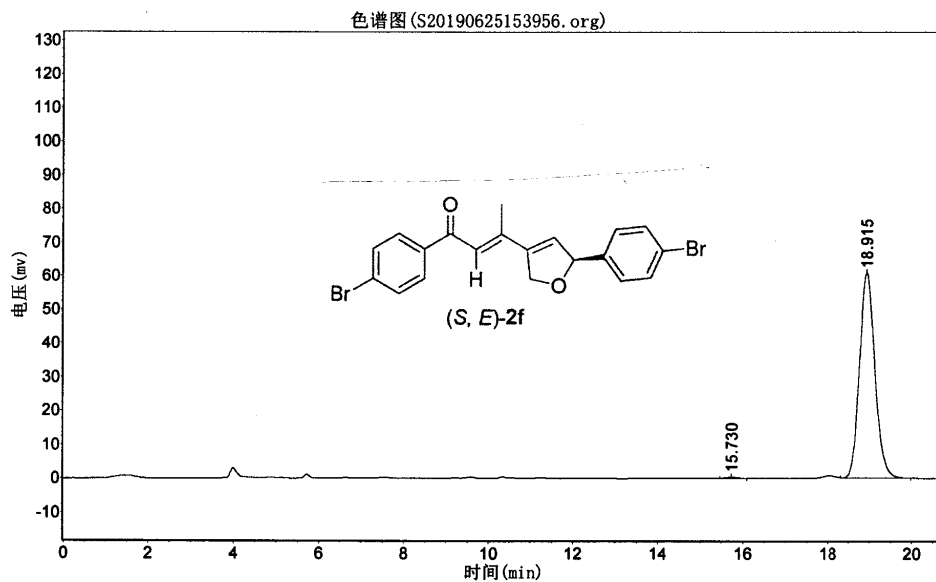

分析结果表

| 峰号 | 峰名 | 保留时间   | 峰高        | 峰面积         | 含量       |
|----|----|--------|-----------|-------------|----------|
| 1  |    | 15.730 | 283.355   | 5224.500    | 0.3407   |
| 2  |    | 18.915 | 60557.109 | 1528178.500 | 99.6593  |
| 总计 |    |        | 60840.465 | 1533403.000 | 100.0000 |

# WXY-5-012(racemic)

实验时间: 2019-06-25, 15:00:32  
 谱图文件: D:\浙大智达\N2000\样品\S20190625150032.org  
 方法文件: D:\浙大智达\N2000\djx.mtd

实验者: wxy  
 报告时间: 2019-06-25, 16:07:08  
 积分方法: 面积归一法

实验内容简介:  
 IC, n-hexane/i-PrOH = 90/10, 0.8, 254

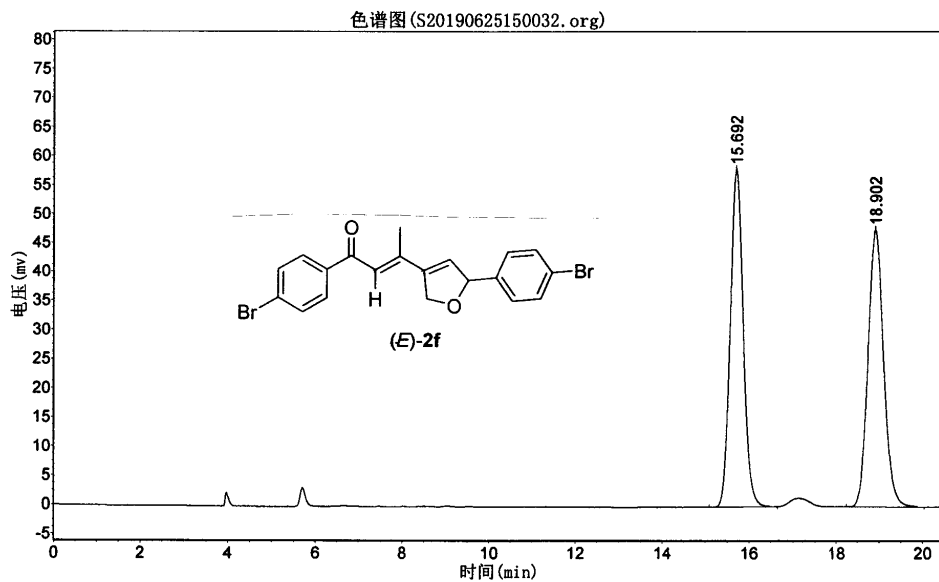

分析结果表

| 峰号 | 峰名 | 保留时间   | 峰高         | 峰面积         | 含量       |
|----|----|--------|------------|-------------|----------|
| 1  |    | 15.692 | 58021.137  | 1190815.125 | 50.0806  |
| 2  |    | 18.902 | 47523.688  | 1186981.500 | 49.9194  |
| 总计 |    |        | 105544.824 | 2377796.625 | 100.0000 |

# wxy-5-015-Chiral

实验时间: 2019-06-24, 11:22:13  
 谱图文件: D:\浙大智达\N2000\样品\S20190624112213.org  
 方法文件: D:\浙大智达\N2000\djx.mtd

实验者: wxy  
 报告时间: 2019-06-24, 12:13:37  
 积分方法: 面积归一法

实验内容简介:  
 AD-H, n-hexane/i-PrOH = 95/5, 1.0, 220

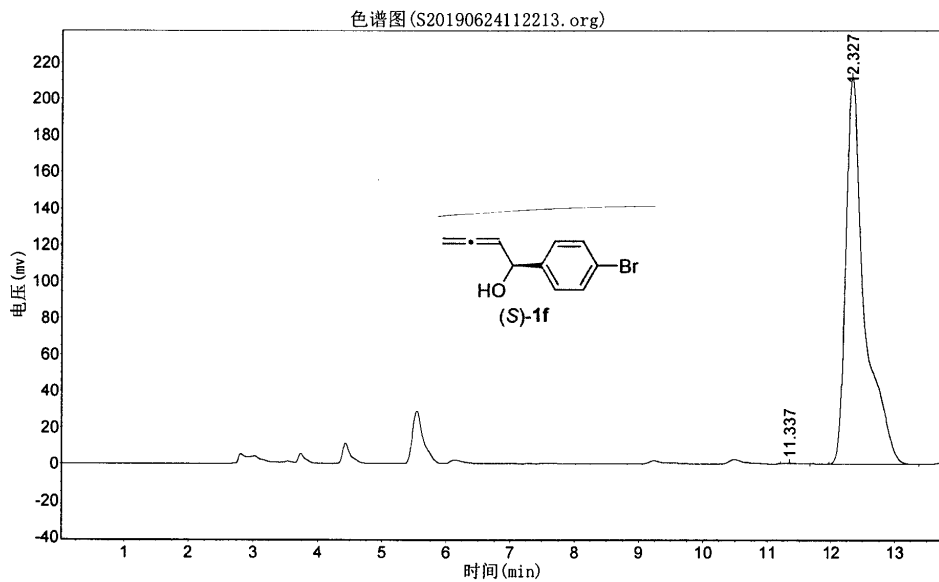

分析结果表

| 峰号 | 峰名 | 保留时间   | 峰高         | 峰面积         | 含量       |
|----|----|--------|------------|-------------|----------|
| 1  |    | 11.337 | 355.909    | 4290.550    | 0.1000   |
| 2  |    | 12.327 | 212233.563 | 4288239.500 | 99.9000  |
| 总计 |    |        | 212589.471 | 4292530.050 | 100.0000 |

# WXY-5-015-racemic

实验时间: 2019-06-23, 10:14:29  
谱图文件: D:\浙大智达\N2000\样品\S20190623101429.org  
方法文件: D:\浙大智达\N2000\djx.mtd

实验者: wxy  
报告时间: 2019-06-23, 22:41:58  
积分方法: 面积归一法

实验内容简介:  
AD-H, n-hexane/i-PrOH = 95/5, 1.0, 220

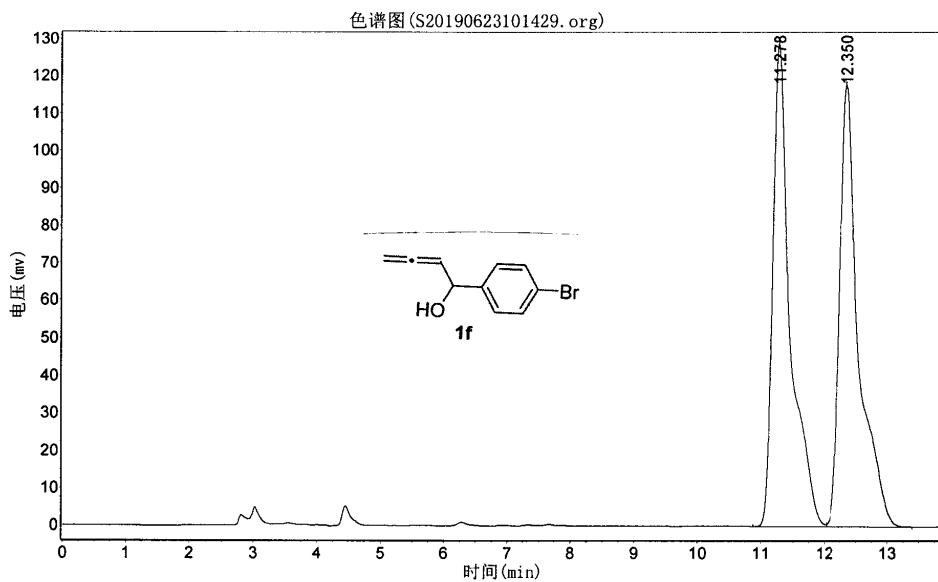

分析结果表

| 峰号 | 峰名 | 保留时间   | 峰高         | 峰面积         | 含量       |
|----|----|--------|------------|-------------|----------|
| 1  |    | 11.278 | 128941.070 | 2447323.250 | 50.0950  |
| 2  |    | 12.350 | 117785.195 | 2438037.750 | 49.9050  |
| 总计 |    |        | 246726.266 | 4885361.000 | 100.0000 |

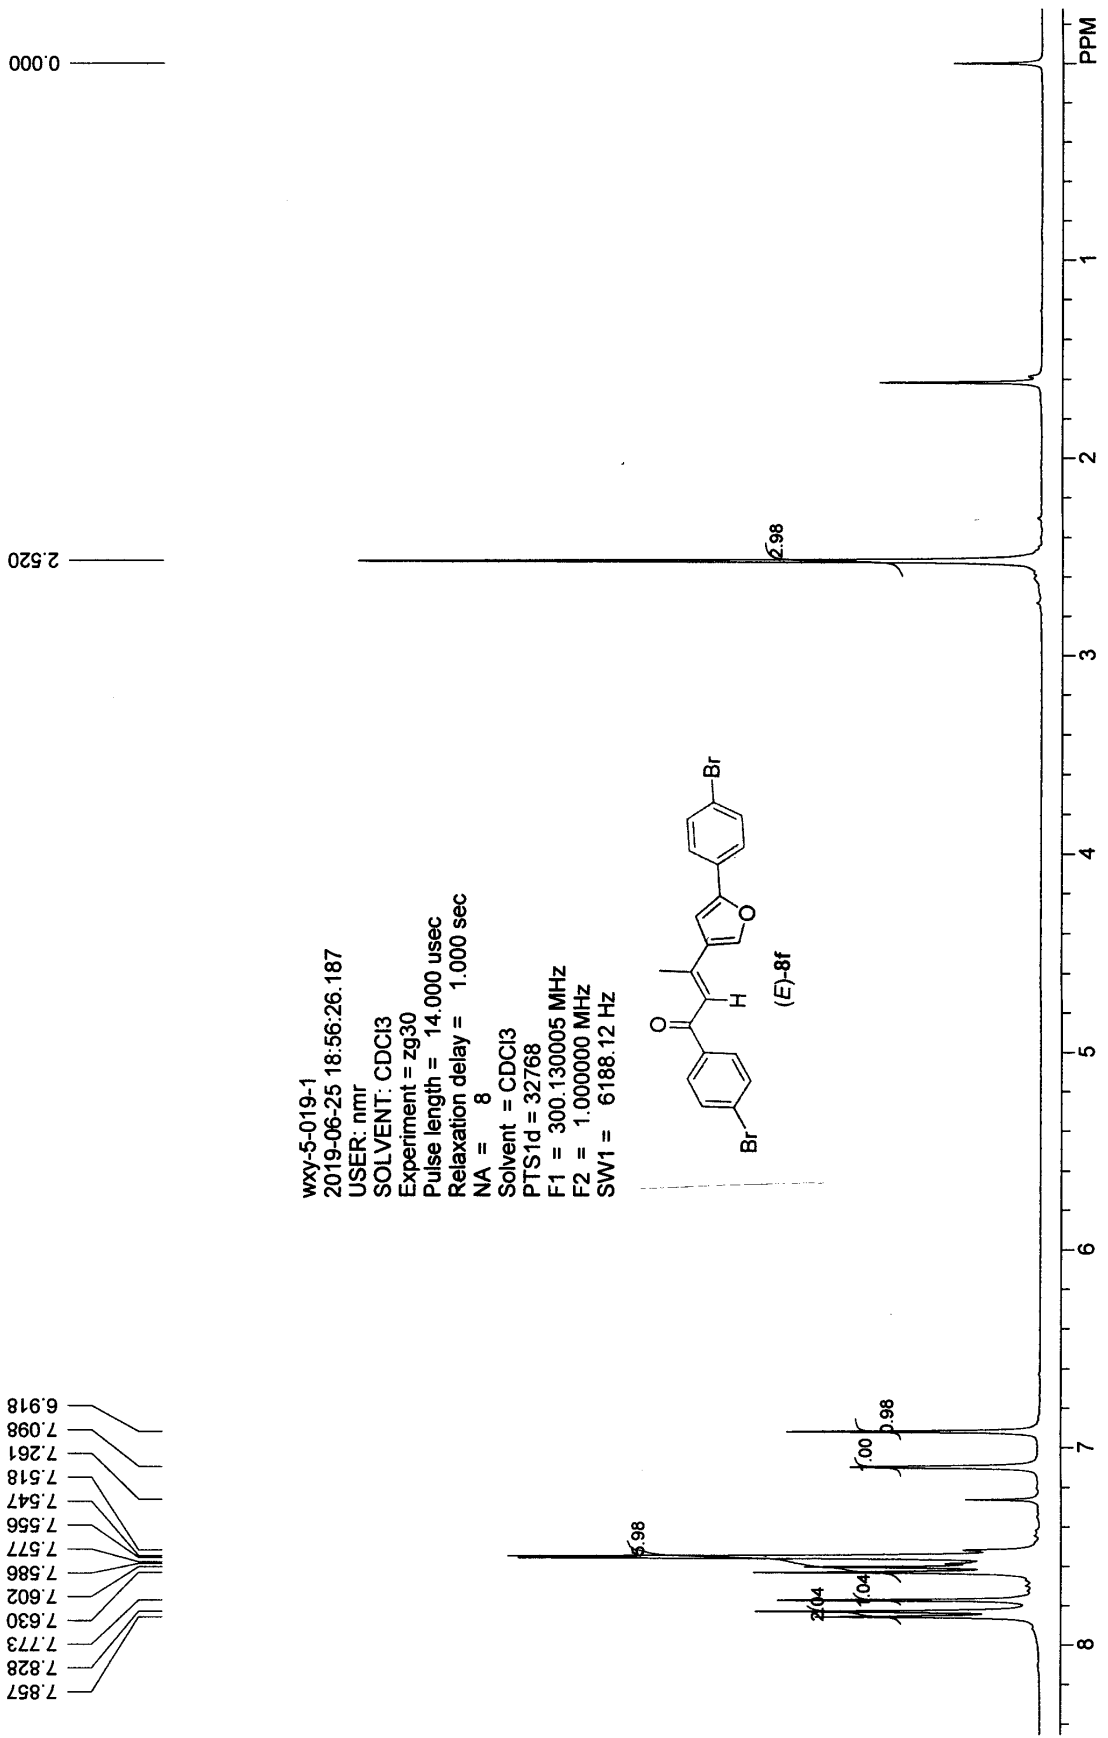

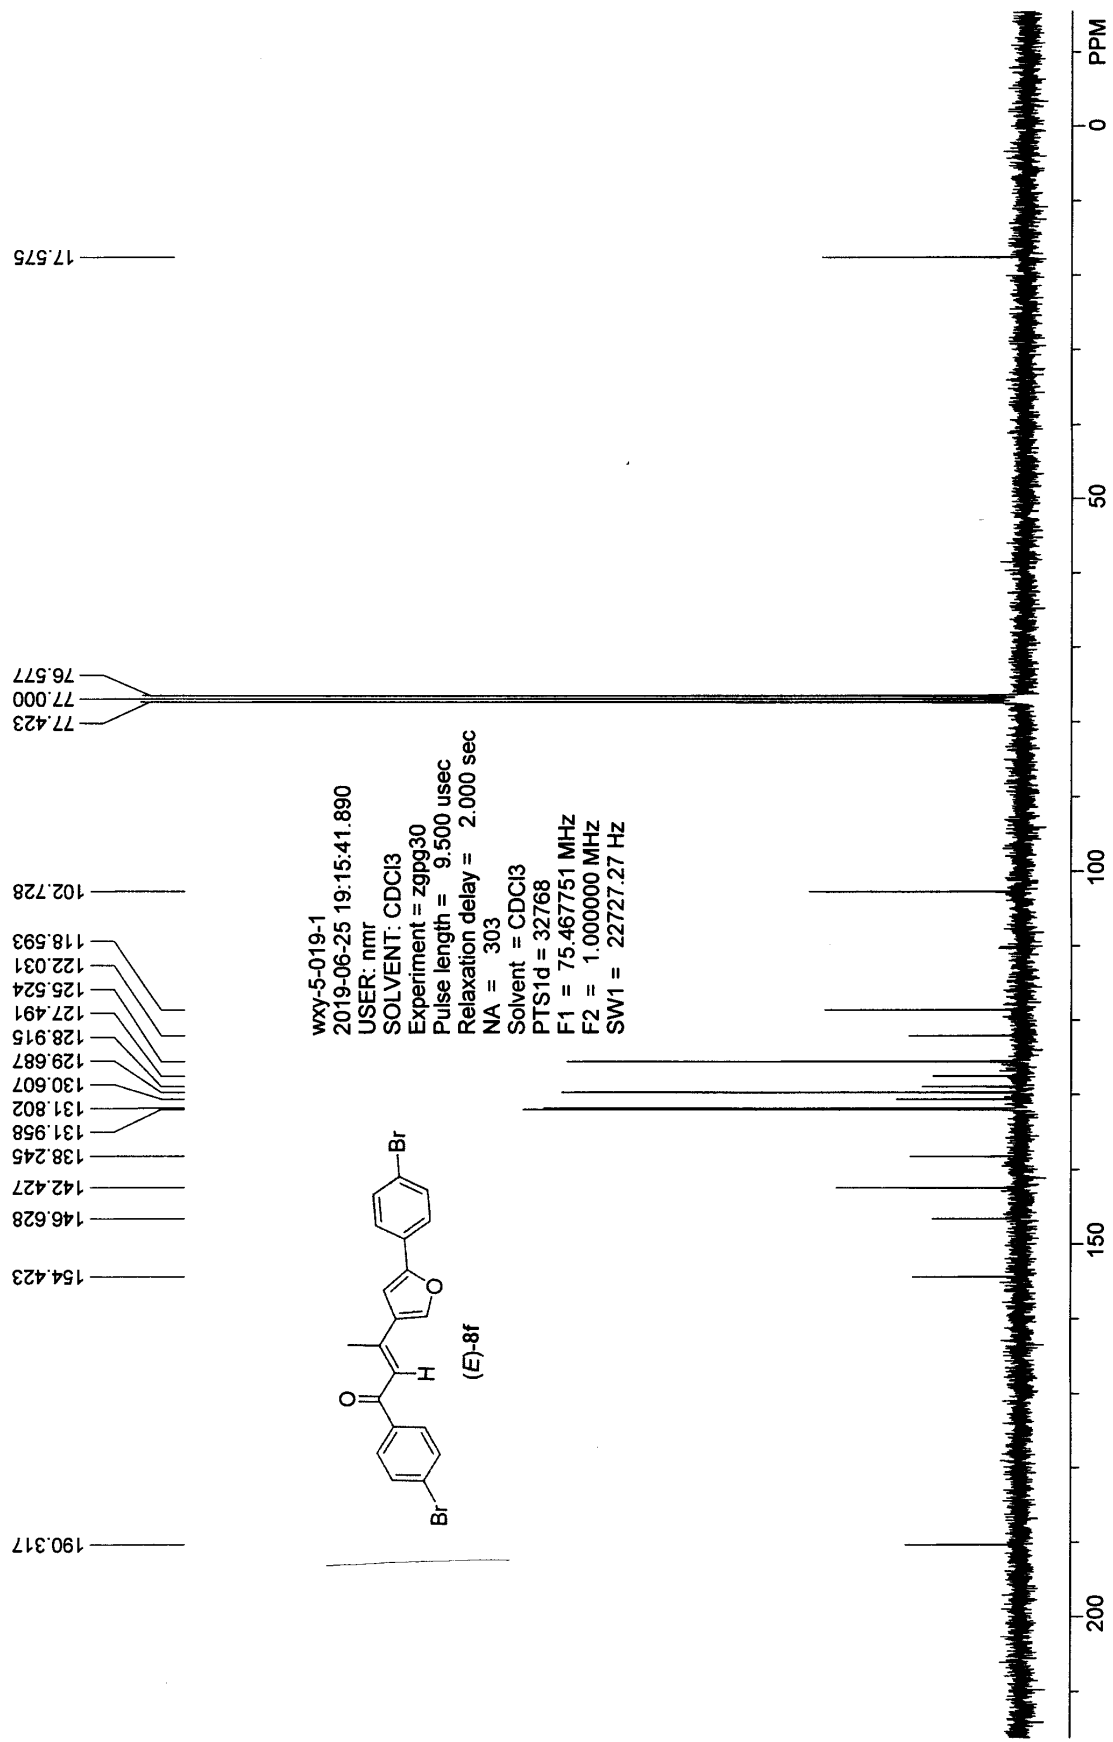



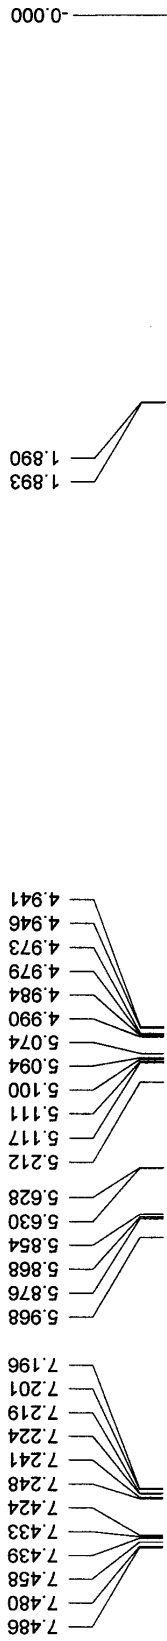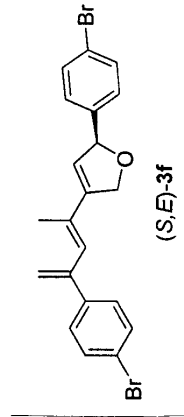

wxy-5-038  
 2019-07-05 18:46:27.187  
 USER: nmr  
 SOLVENT: CDCl3  
 Experiment = zg30  
 Pulse length = 14.000 usec  
 Relaxation delay = 1.000 sec  
 NA = 8  
 Solvent = CDCl3  
 PTS1d = 32768  
 F1 = 300.130005 MHz  
 F2 = 1.000000 MHz  
 SW1 = 6188.12 Hz

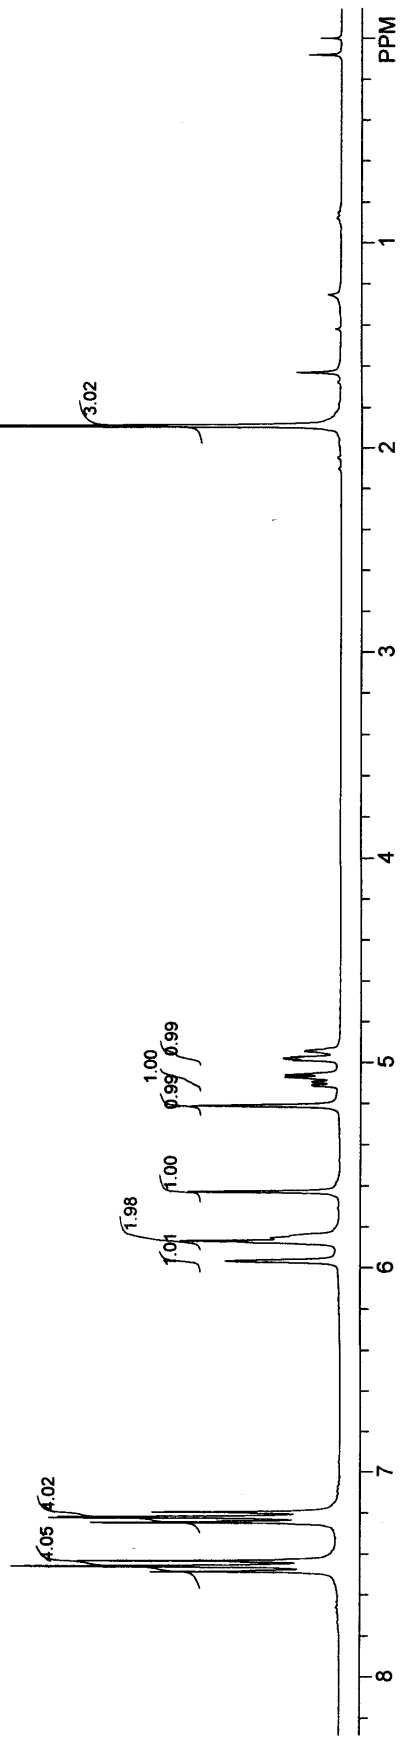

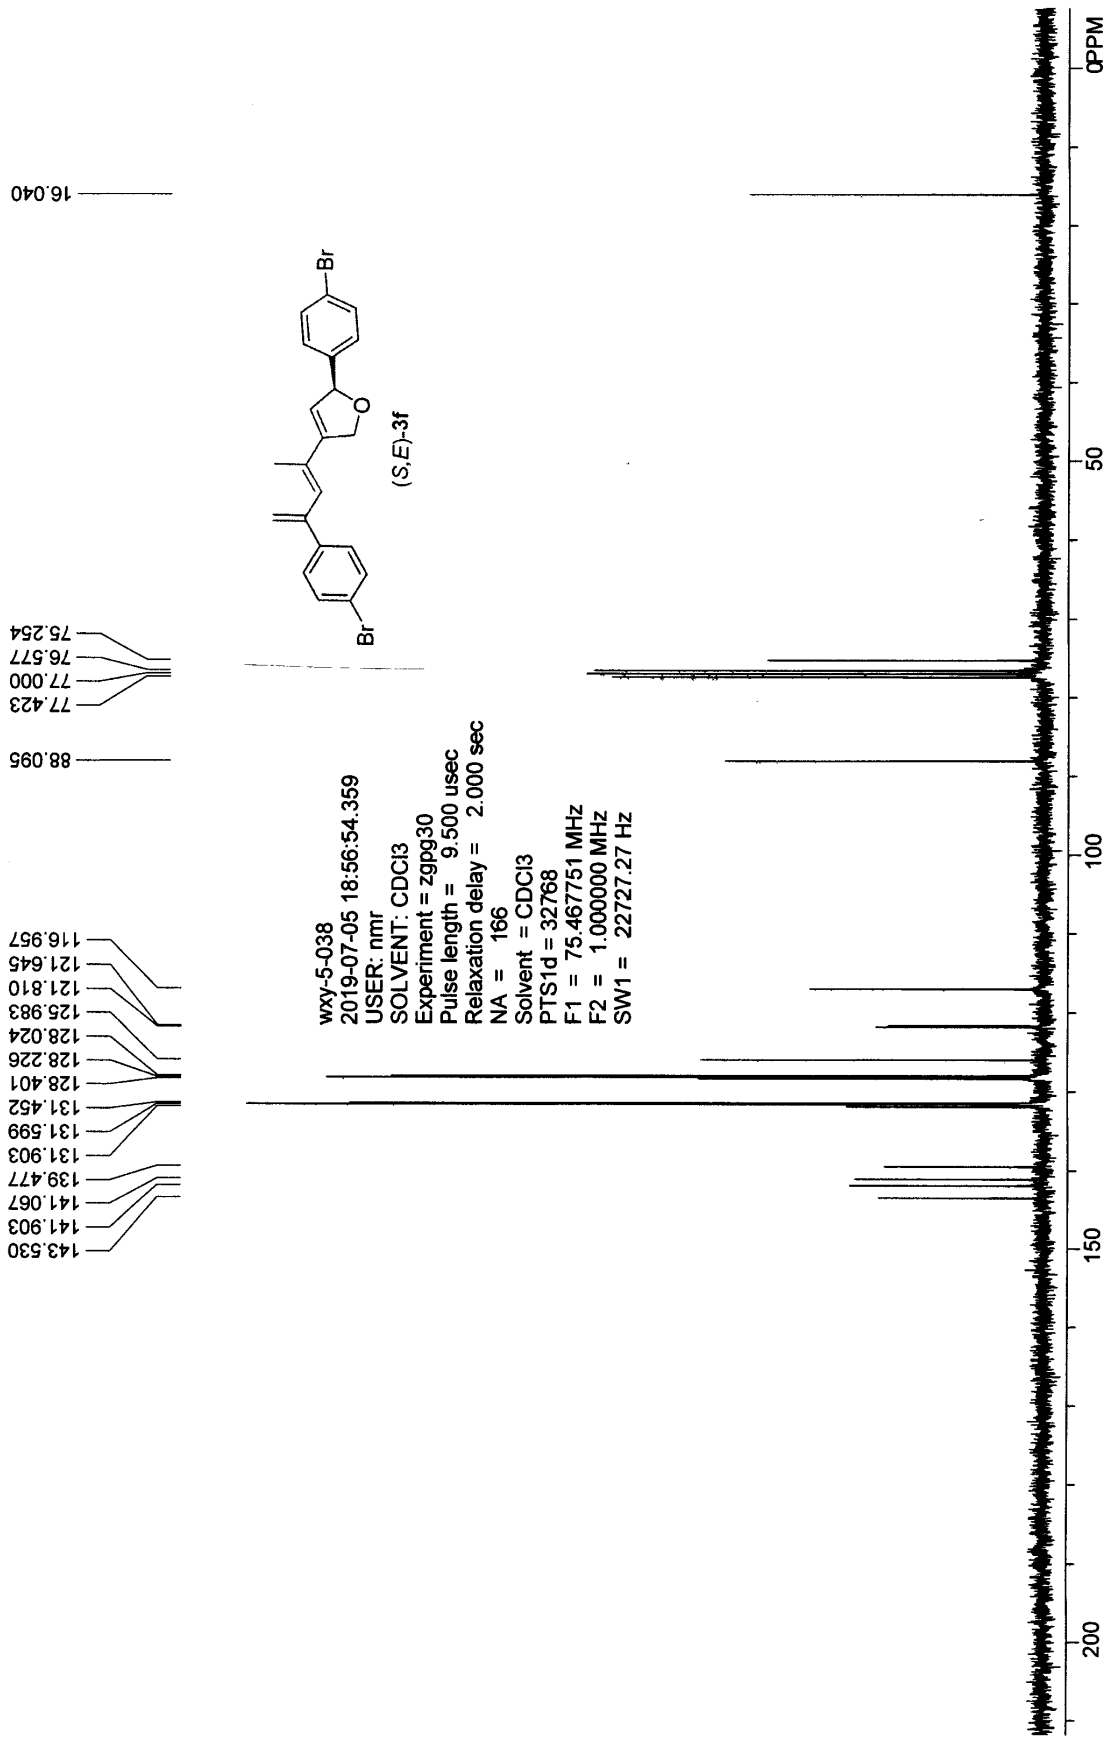

# WXY-5-038 (Chiral)

实验时间: 2019-07-05, 16:45:13  
 谱图文件: D:\浙大智达\N2000\样品\S20190705164513.org  
 方法文件: D:\浙大智达\N2000\djx.mtd

实验者: wxy  
 报告时间: 2019-07-05, 17:09:05  
 积分方法: 面积归一法

实验内容简介:  
 IA, n-hexane/i-PrOH = 80/20, 0.7, 254

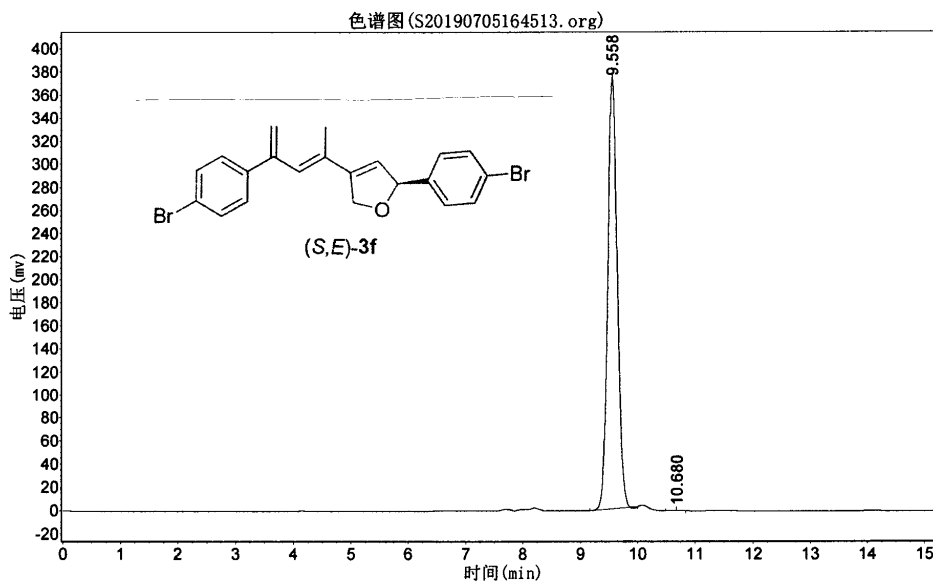

分析结果表

| 峰号 | 峰名 | 保留时间   | 峰高         | 峰面积         | 含量       |
|----|----|--------|------------|-------------|----------|
| 1  |    | 9.558  | 372756.344 | 4288745.000 | 99.9219  |
| 2  |    | 10.680 | 310.067    | 3353.850    | 0.0781   |
| 总计 |    |        | 373066.411 | 4292098.850 | 100.0000 |

# wxy-5-037 (racemic)

实验时间: 2019-07-05, 16:29:36  
谱图文件: D:\浙大智达\N2000\样品\S20190705162936.org  
方法文件: D:\浙大智达\N2000\djx.mtd

实验者: wxy  
报告时间: 2019-07-05, 16:47:41  
积分方法: 面积归一法

实验内容简介:  
IA, n-hexane/i-PrOH = 90/10, 0.7, 254

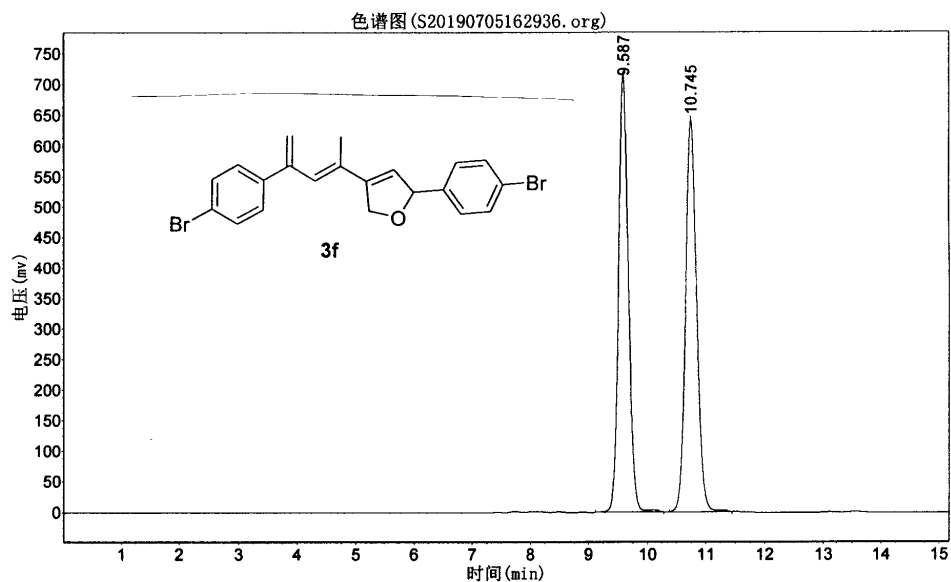

分析结果表

| 峰号 | 峰名 | 保留时间   | 峰高          | 峰面积          | 含量       |
|----|----|--------|-------------|--------------|----------|
| 1  |    | 9.587  | 713513.500  | 8305324.500  | 49.8856  |
| 2  |    | 10.745 | 640357.125  | 8343432.000  | 50.1144  |
| 总计 |    |        | 1353870.625 | 16648756.500 | 100.0000 |

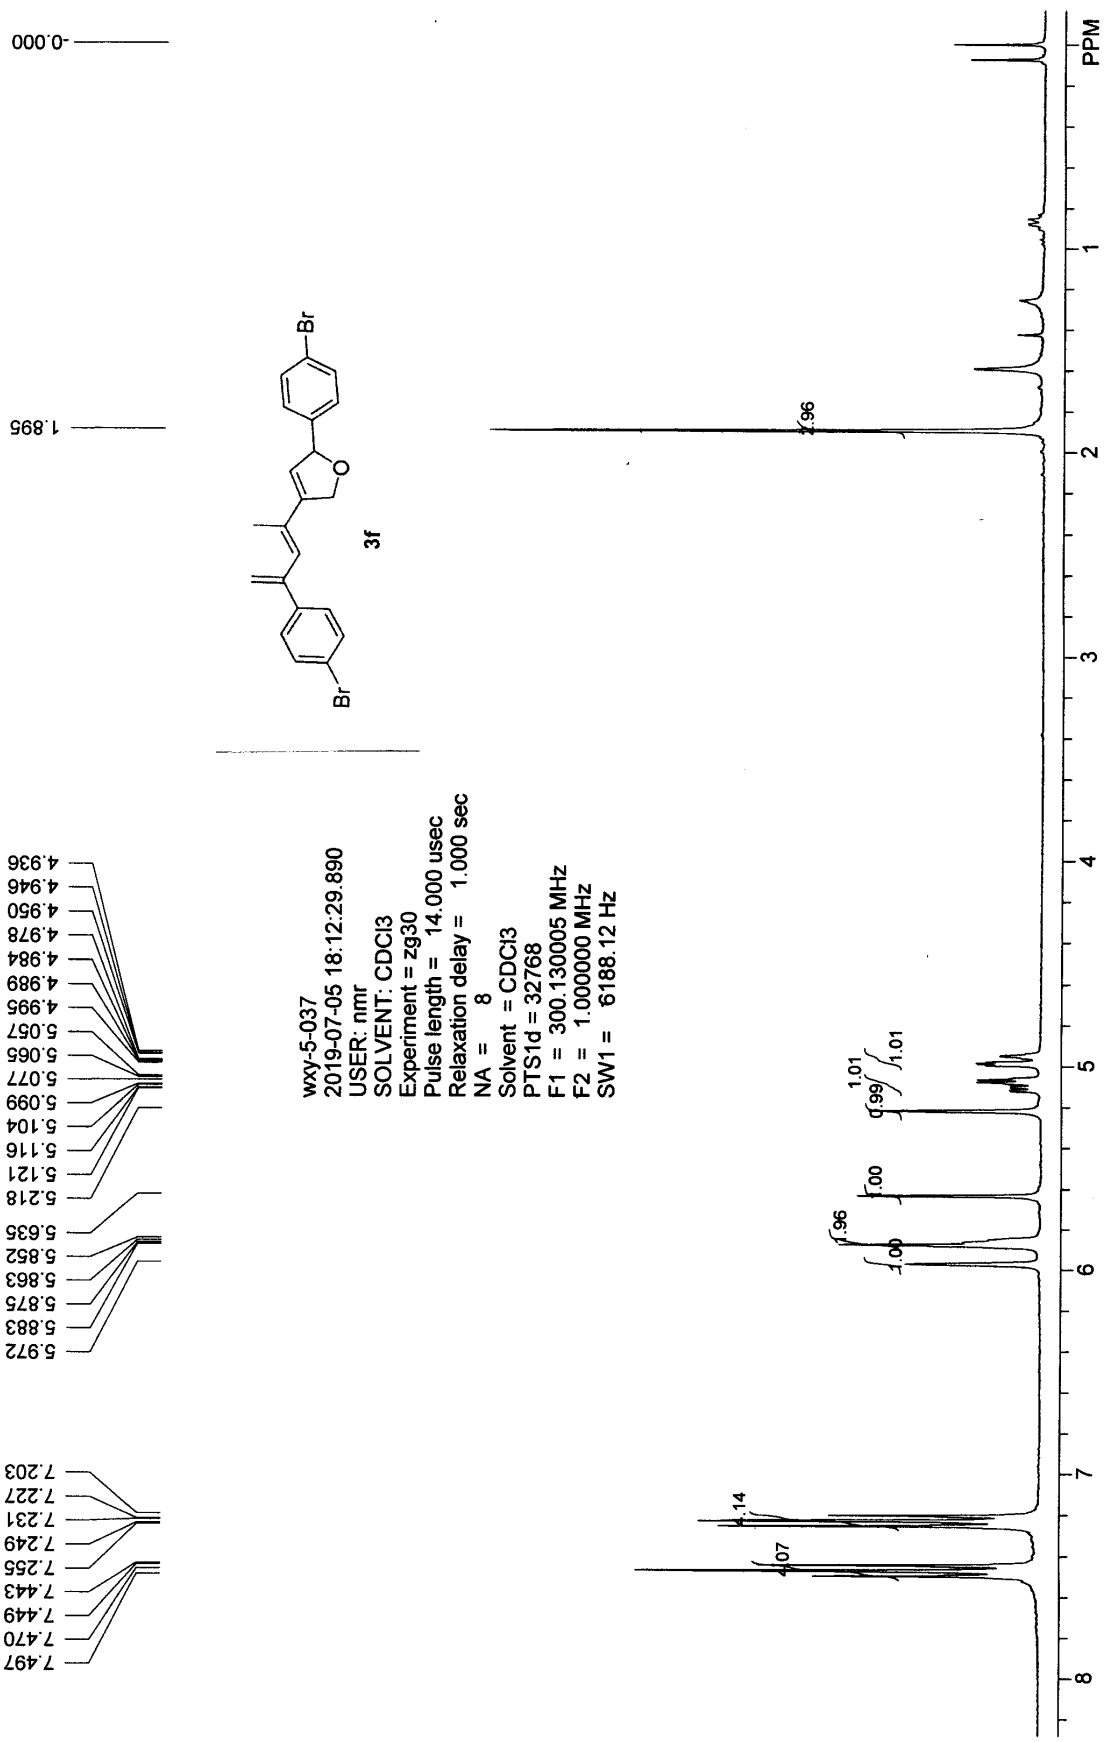

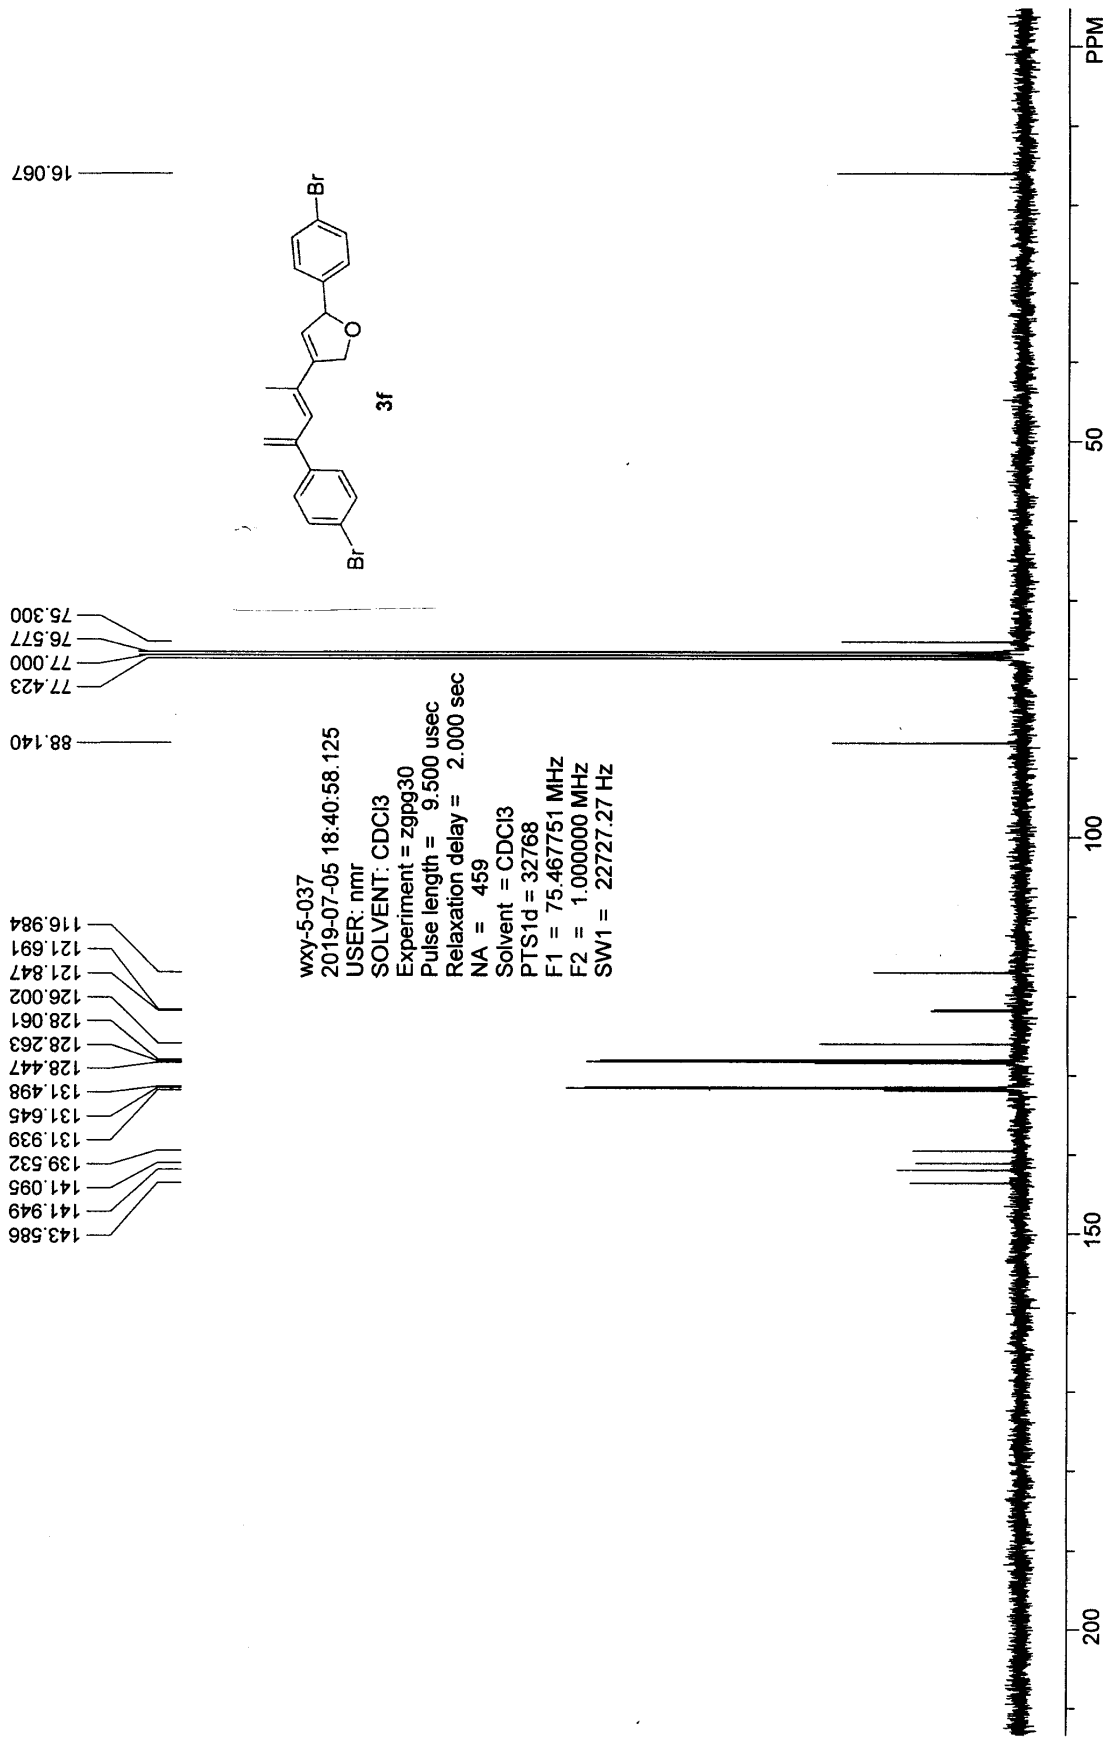

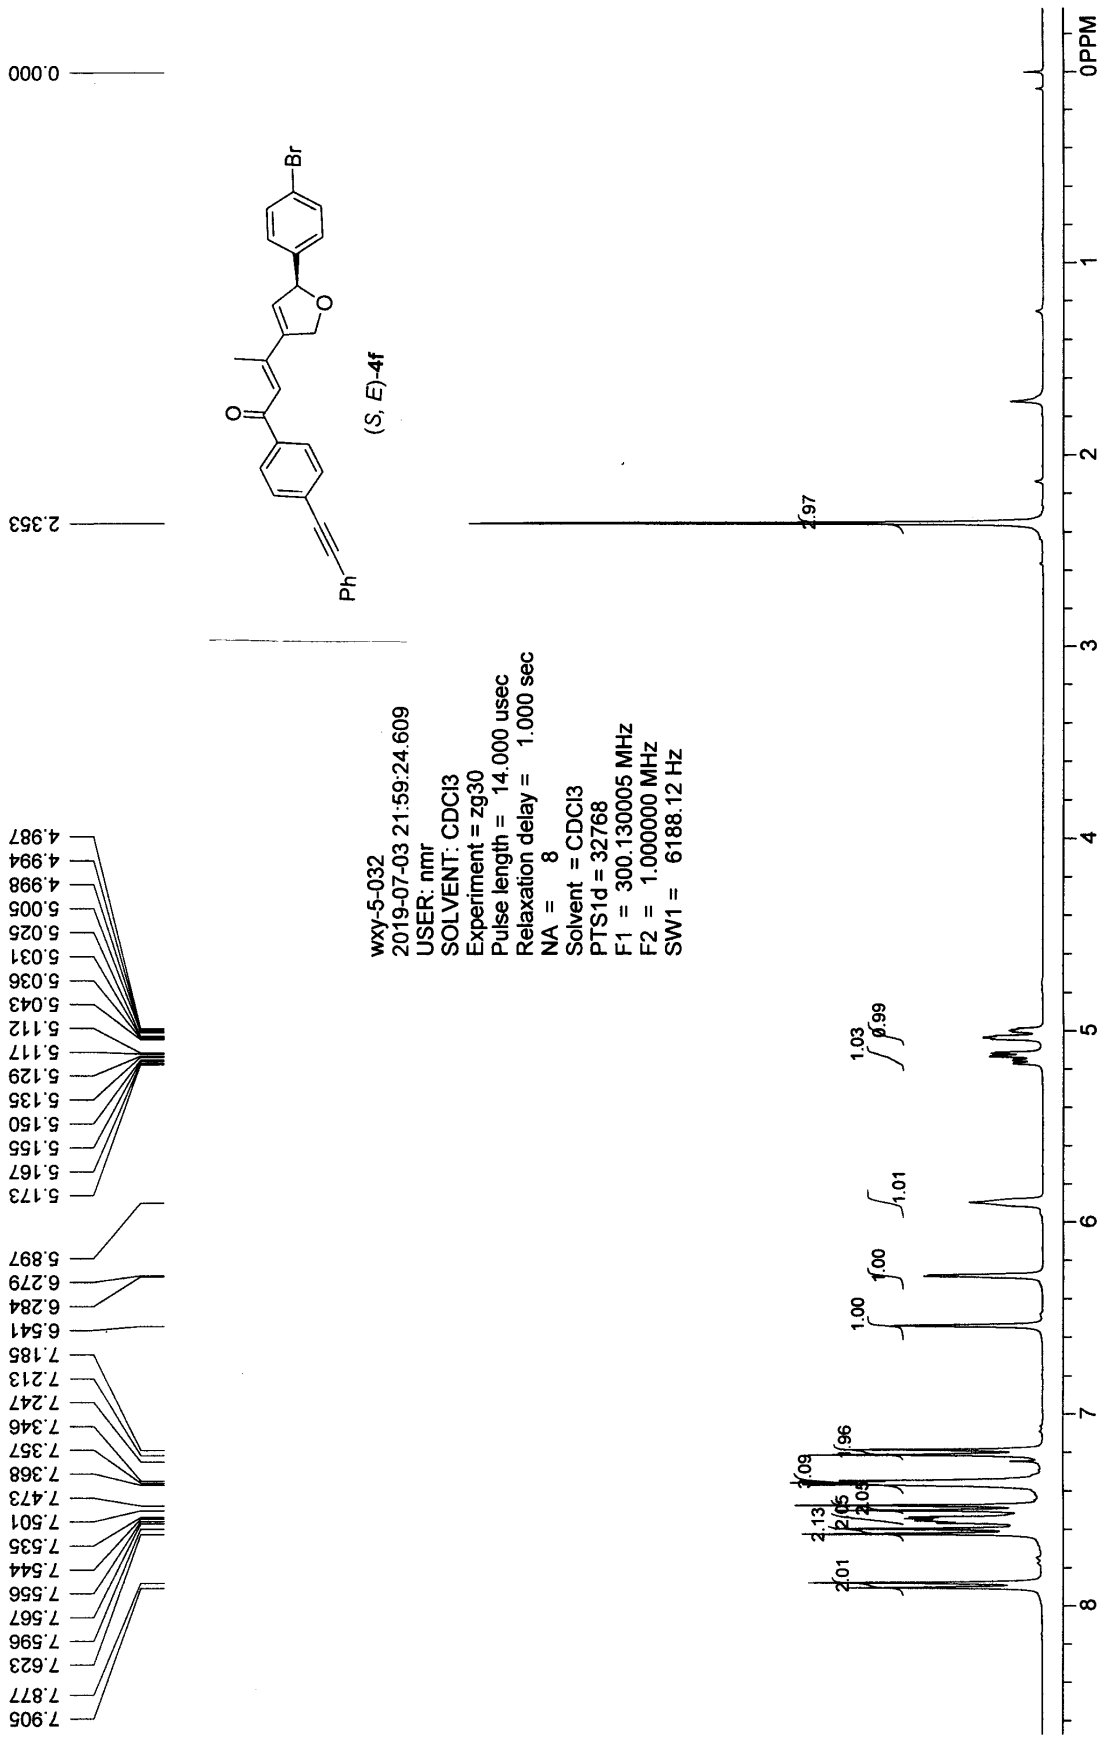

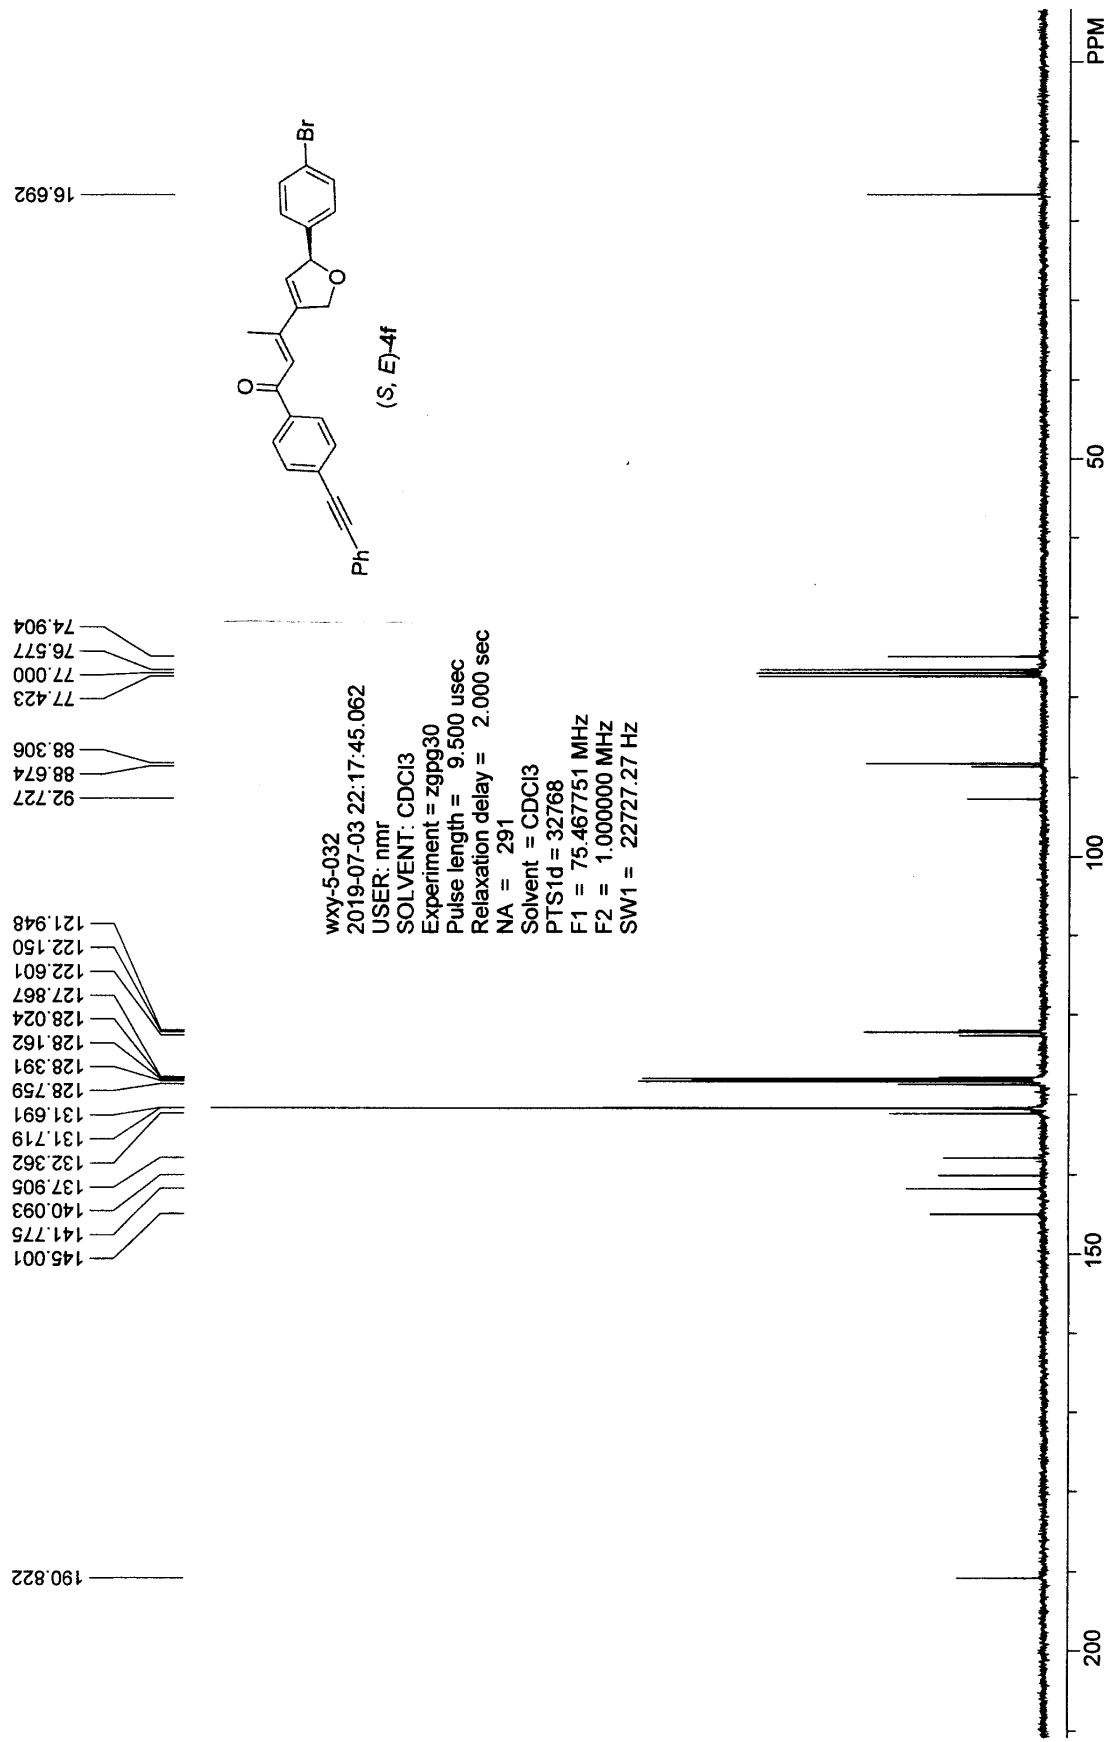



# wxy-5-032(Chiral)

实验时间: 2019-07-03, 22:07:08  
 谱图文件: D:\浙大智达\N2000\样品\S20190703220708.org  
 方法文件: D:\浙大智达\N2000\djx.mtd

实验者: wxy  
 报告时间: 2019-07-04, 9:57:10  
 积分方法: 面积归一法

实验内容简介:  
 IA, n-hexane/i-PrOH = 90/10, 1.3, 254

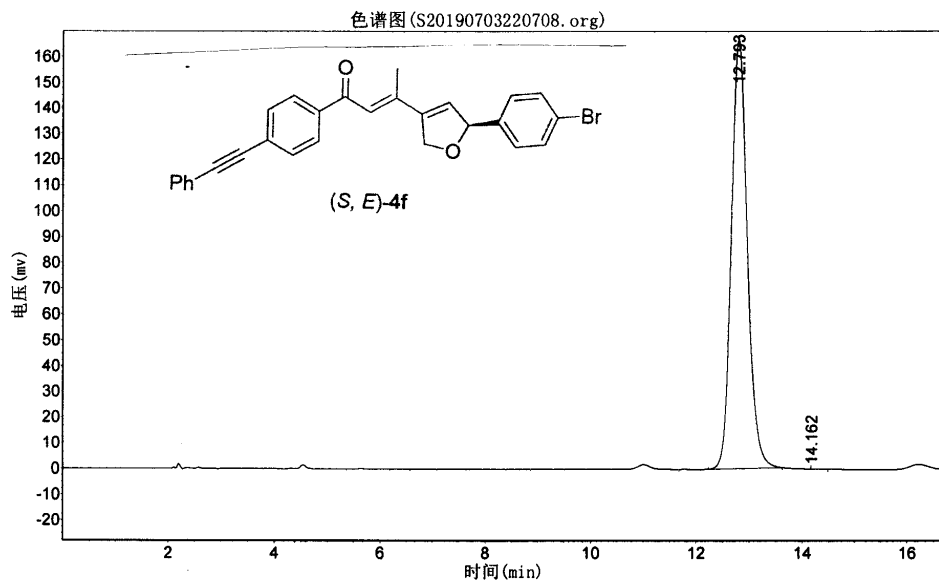

分析结果表

| 峰号 | 峰名 | 保留时间   | 峰高         | 峰面积         | 含量       |
|----|----|--------|------------|-------------|----------|
| 1  |    | 12.793 | 167018.141 | 3491009.250 | 100.0034 |
| 2  |    | 14.162 | 2.522      | -119.200    | -0.0034  |
| 总计 |    |        | 167020.663 | 3490890.050 | 100.0000 |

# wxy-5-026(racemic)

实验时间: 2019-07-03, 22:34:12  
 谱图文件: D:\浙大智达\N2000\样品\S20190703223412.org  
 方法文件: D:\浙大智达\N2000\djx.mtd

实验者: wxy  
 报告时间: 2019-07-04, 9:51:31  
 积分方法: 面积归一法

实验内容简介:  
 IA, n-hexane/i-PrOH = 90/10, 1.3, 254

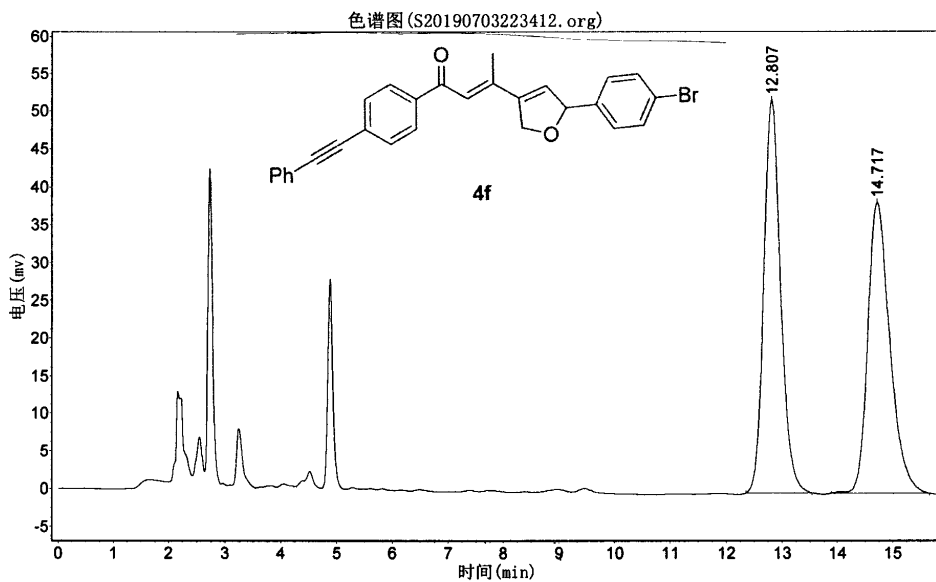

分析结果表

| 峰号 | 峰名 | 保留时间   | 峰高        | 峰面积         | 含量       |
|----|----|--------|-----------|-------------|----------|
| 1  |    | 12.807 | 52011.453 | 1089278.625 | 50.4702  |
| 2  |    | 14.717 | 38594.563 | 1068981.625 | 49.5298  |
| 总计 |    |        | 90606.016 | 2158260.250 | 100.0000 |



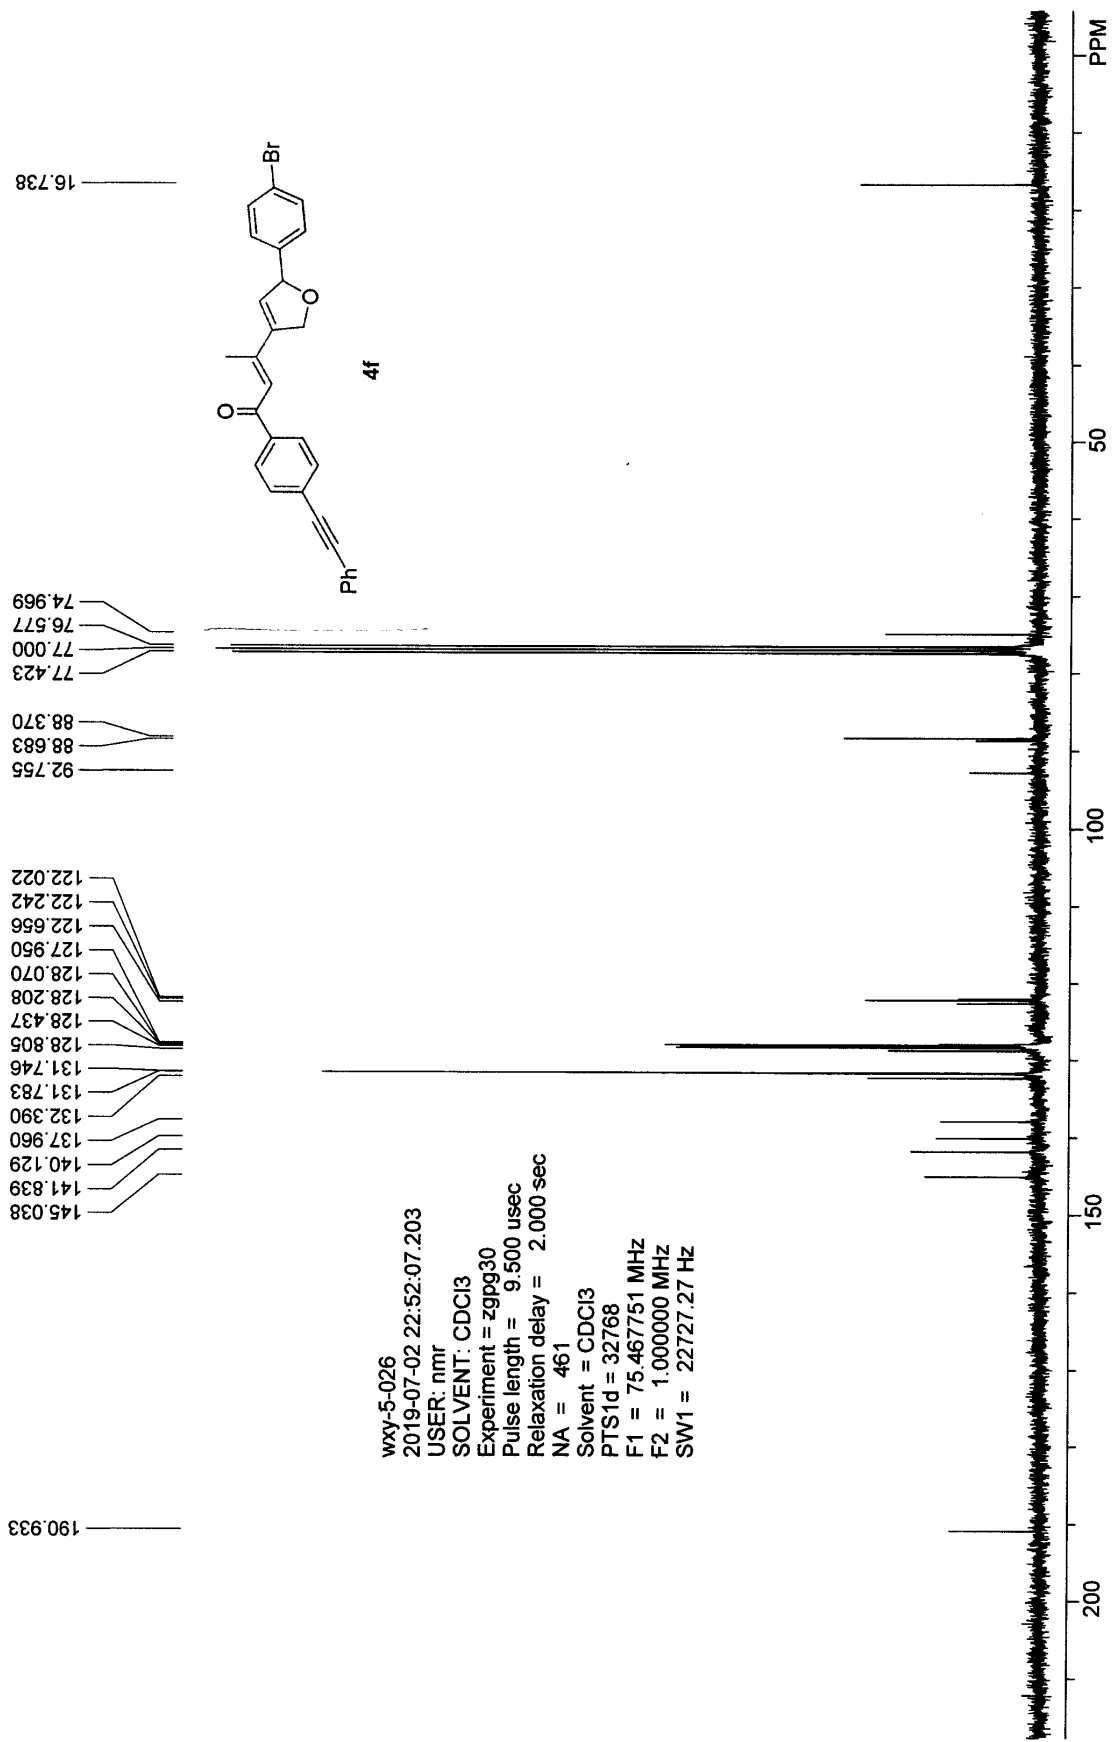

wxy-5-026  
 2019-07-02 22:52:07.203  
 USER: nmr  
 SOLVENT: CDCl3  
 Experiment = zgpg30  
 Pulse length = 9.500 usec  
 Relaxation delay = 2.000 sec  
 NA = 461  
 Solvent = CDCl3  
 PTS1d = 32768  
 F1 = 75.467751 MHz  
 F2 = 1.000000 MHz  
 SW1 = 22727.27 Hz

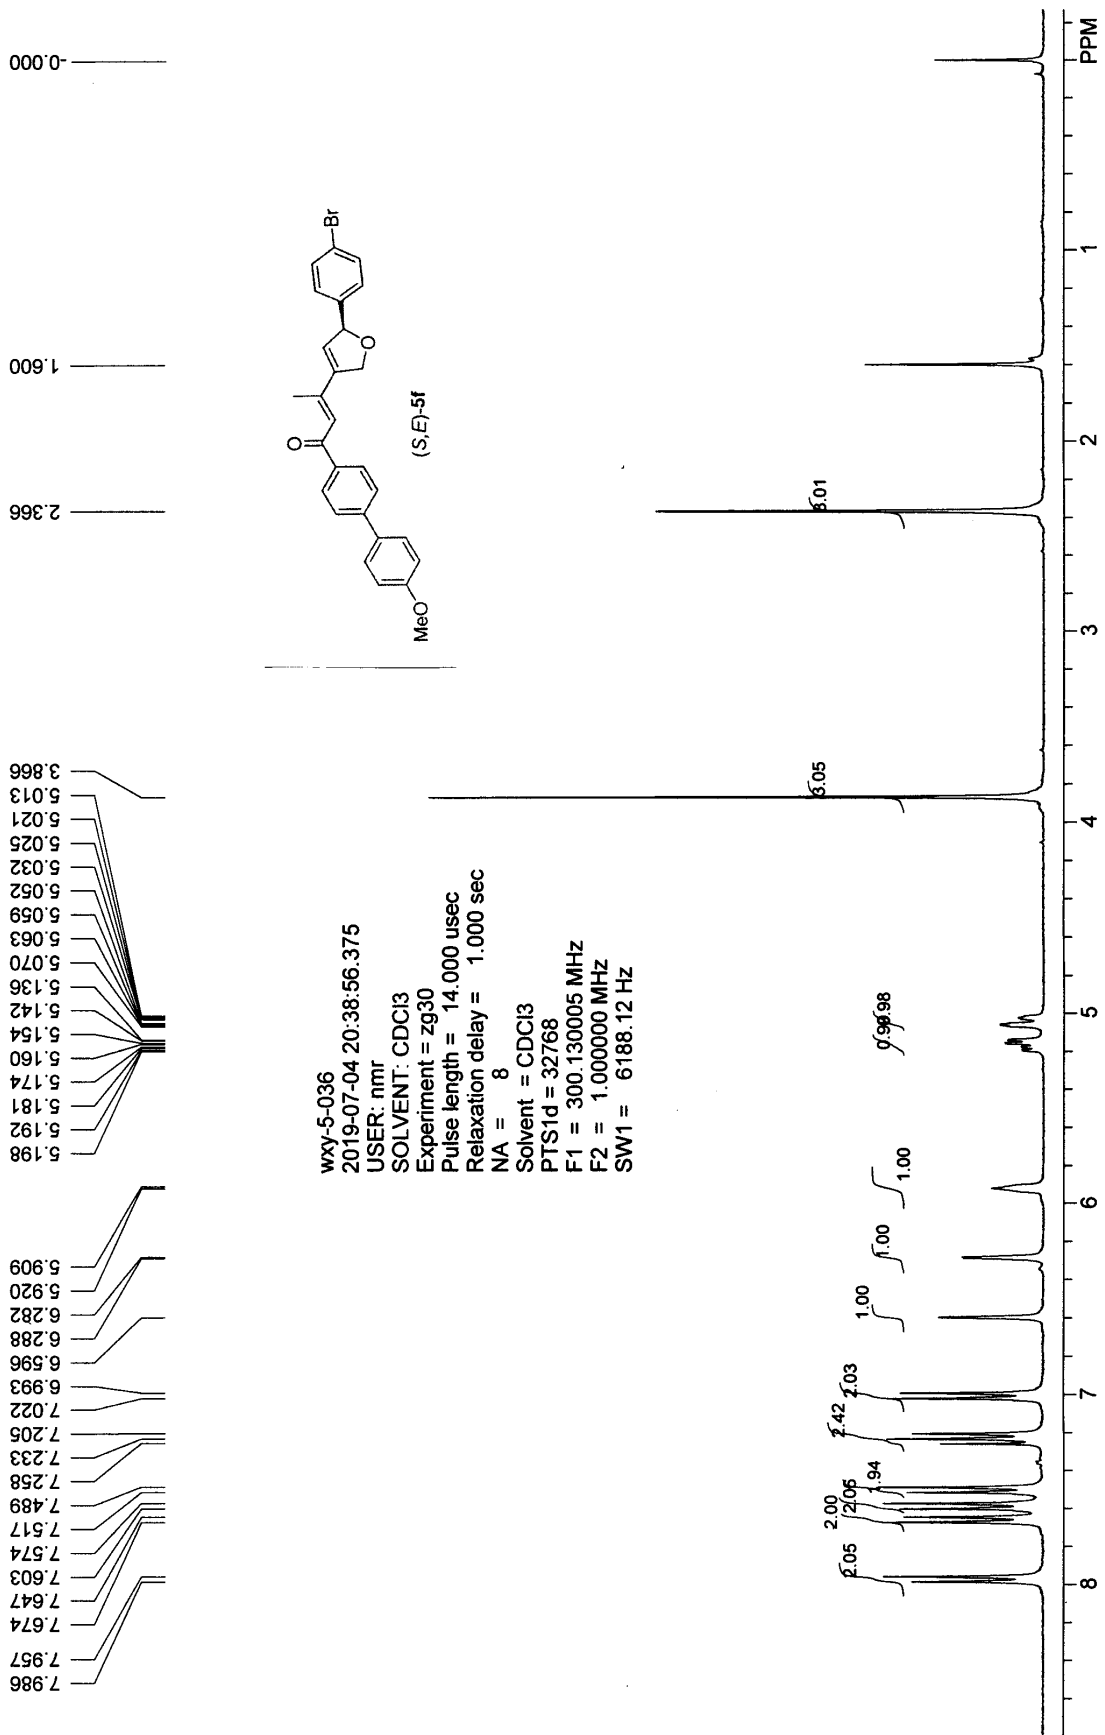

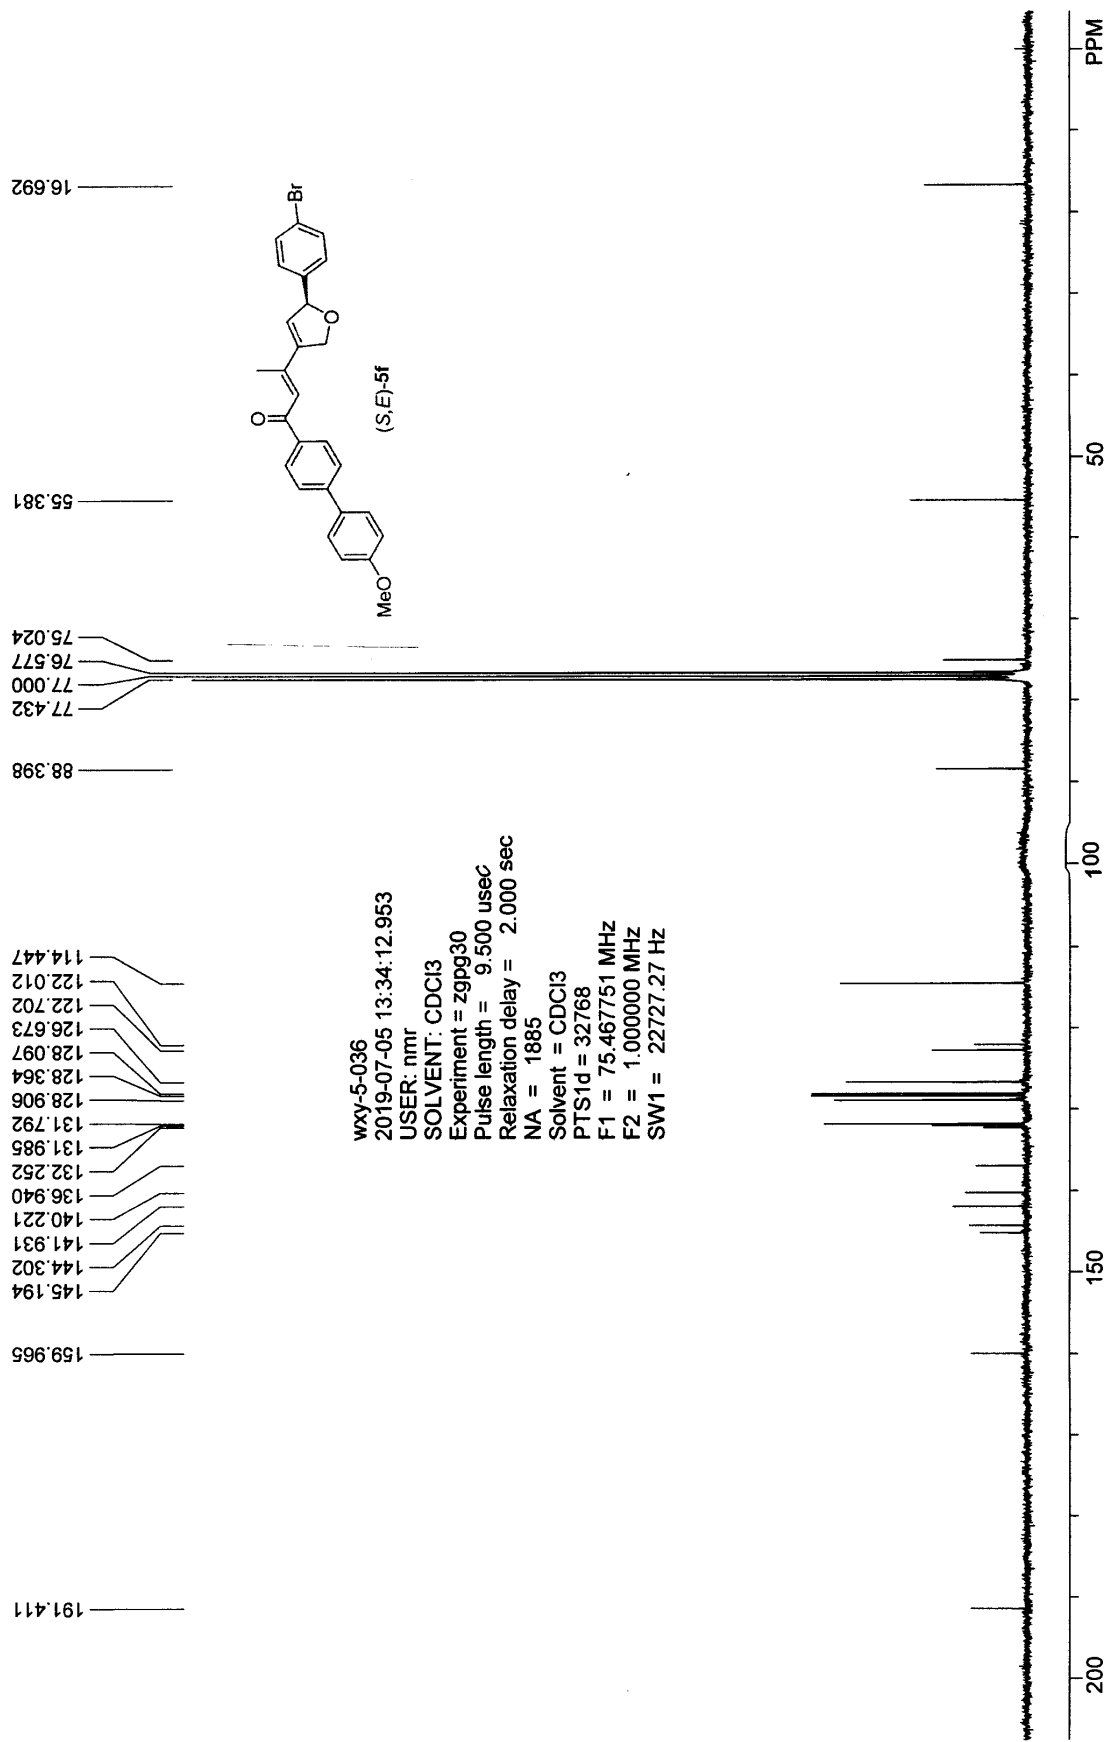

# WXY-5-029 (Chiral)

实验时间: 2019-07-05, 8:42:55  
 谱图文件: D:\浙大智达\N2000\样品\S20190705084255.org  
 方法文件: D:\浙大智达\N2000\djx.mtd

实验者: WXY  
 报告时间: 2019-07-05, 9:35:50  
 积分方法: 面积归一法

实验内容简介:  
 IA, n-hexane/i-PrOH = 80/20, 1.3, 254

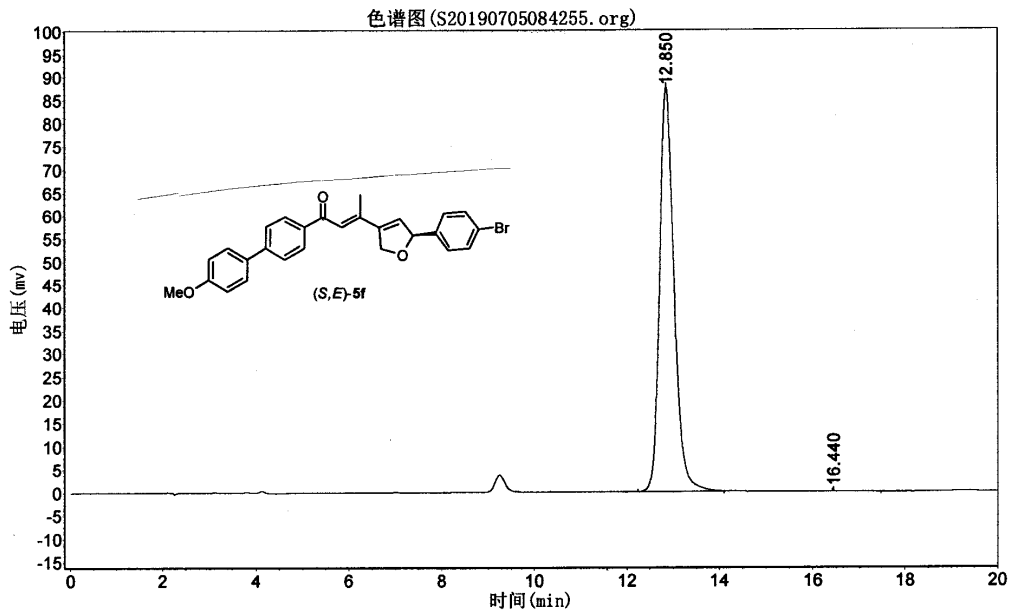

分析结果表

| 峰号 | 峰名 | 保留时间   | 峰高        | 峰面积         | 含量       |
|----|----|--------|-----------|-------------|----------|
| 1  |    | 12.850 | 87458.180 | 1886878.750 | 100.0077 |
| 2  |    | 16.440 | 8.189     | -144.900    | -0.0077  |
| 总计 |    |        | 87466.369 | 1886733.850 | 100.0000 |

# wxy-5-036 (Racemic)

实验时间: 2019-07-05, 9:08:41  
 谱图文件: D:\浙大智达\N2000\样品\S20190705090841.org  
 方法文件: D:\浙大智达\N2000\djx.mtd

实验者: wxy  
 报告时间: 2019-07-05, 9:31:39  
 积分方法: 面积归一法

实验内容简介:  
 IA, n-hexane/i-PrOH = 80/20, 1. 3, 254

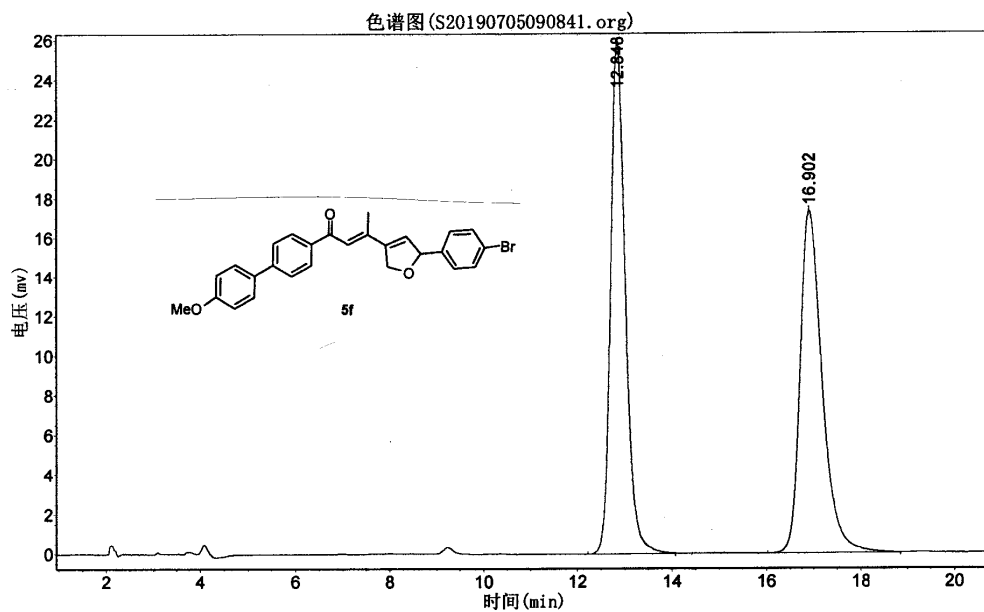

分析结果表

| 峰号 | 峰名 | 保留时间   | 峰高        | 峰面积         | 含量       |
|----|----|--------|-----------|-------------|----------|
| 1  |    | 12.848 | 25912.004 | 561805.438  | 50.1787  |
| 2  |    | 16.902 | 17321.164 | 557803.063  | 49.8213  |
| 总计 |    |        | 43233.168 | 1119608.500 | 100.0000 |



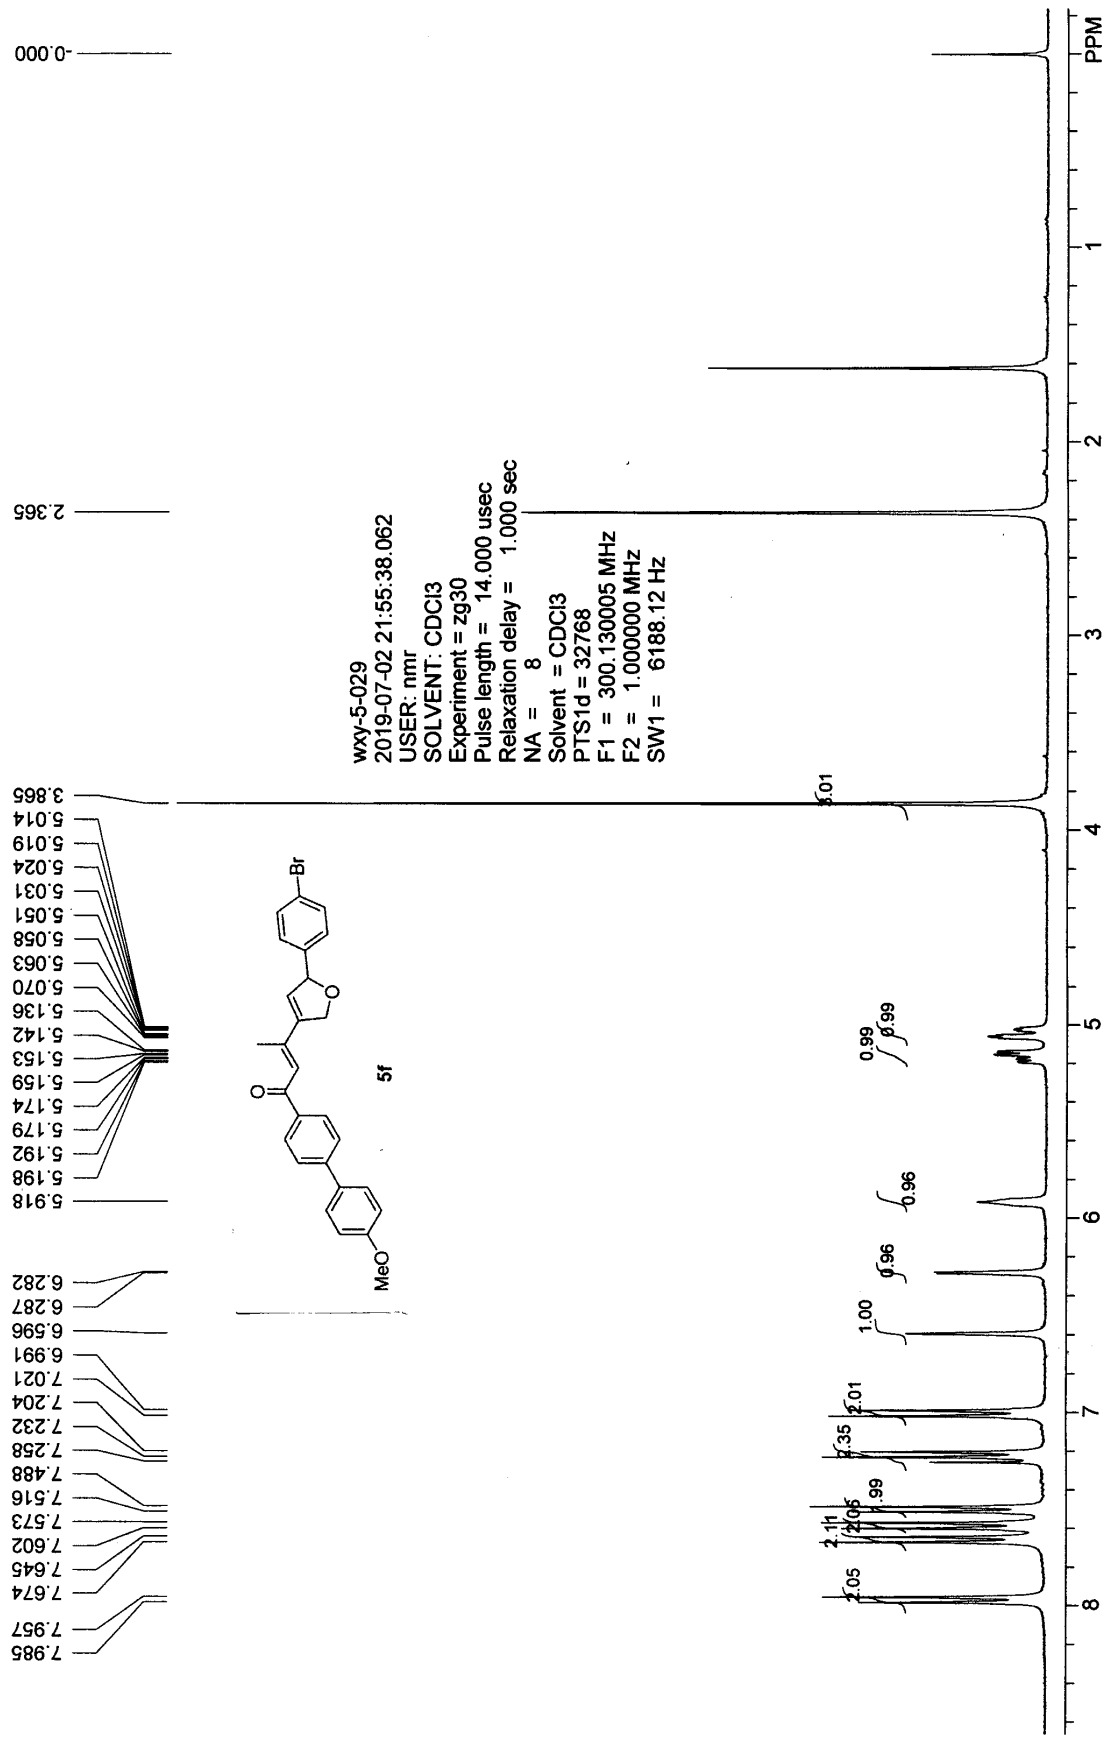

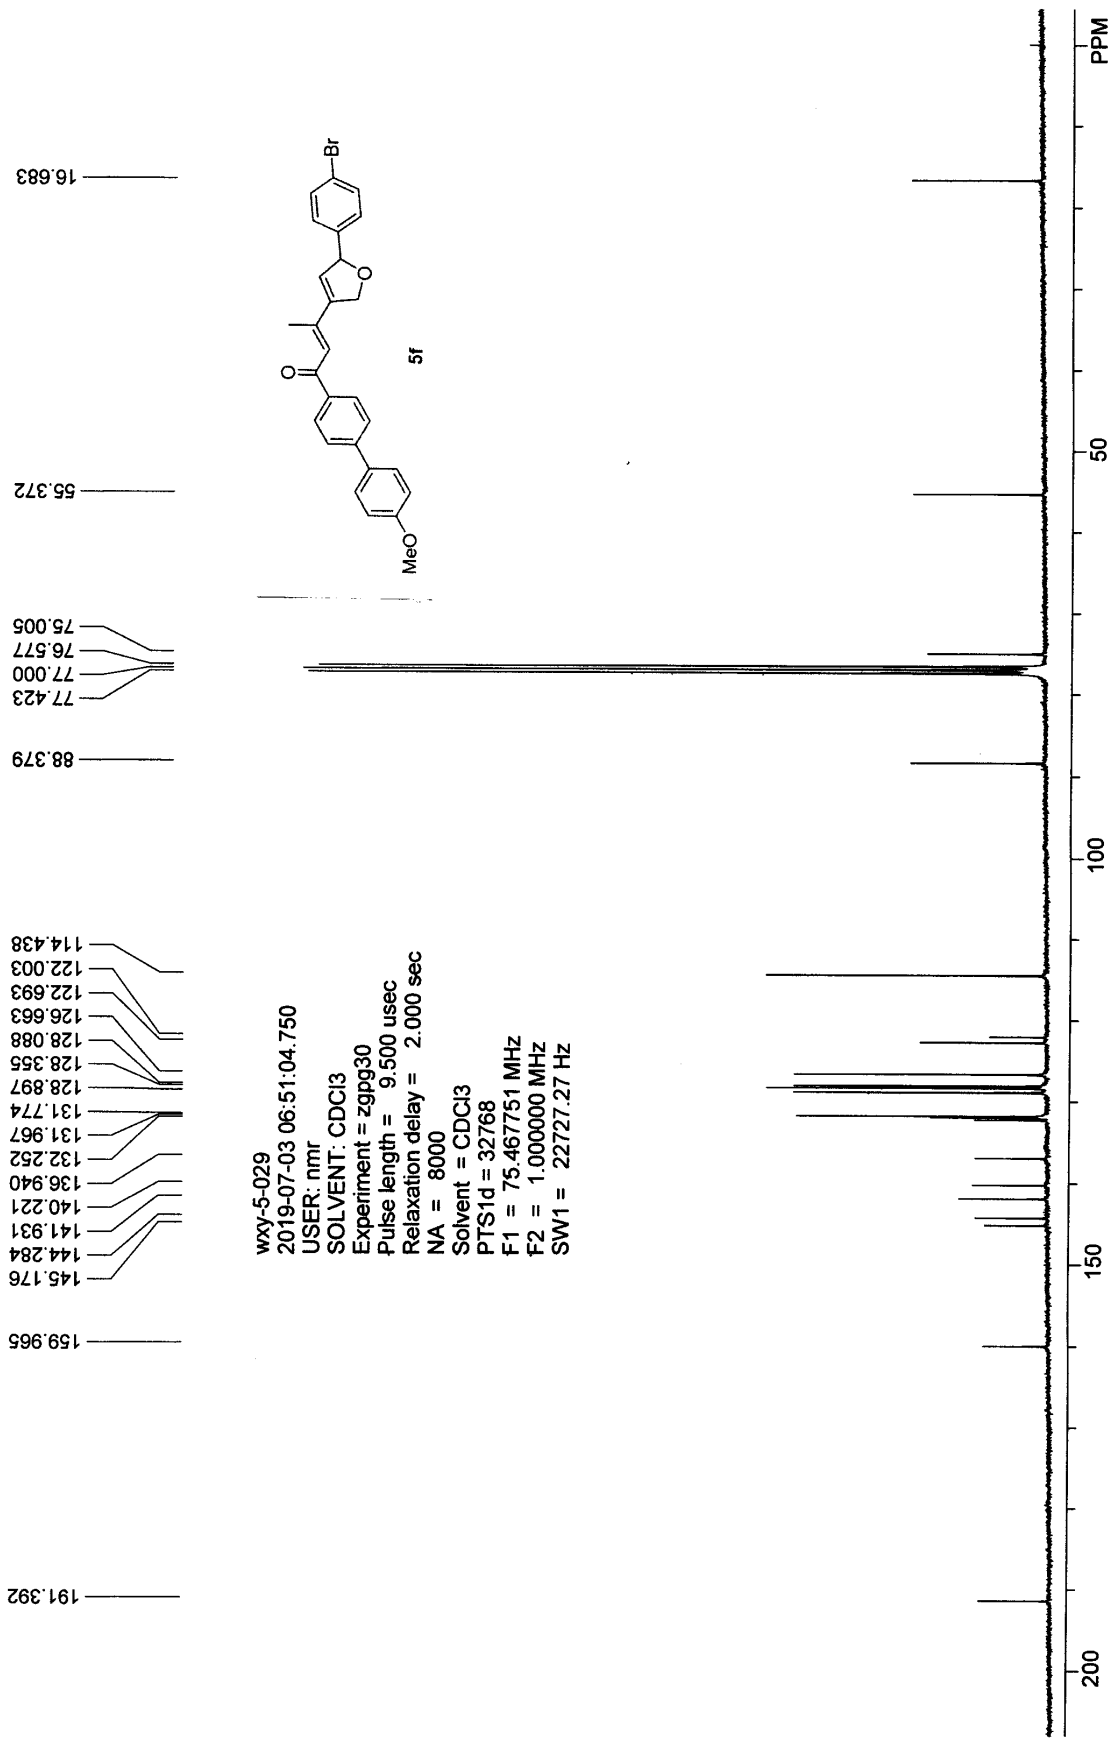

wxy-5-029  
 2019-07-03 06:51:04.750  
 USER: nmr  
 SOLVENT: CDCl3  
 Experiment = zgpg30  
 Pulse length = 9.500 usec  
 Relaxation delay = 2.000 sec  
 NA = 8000  
 Solvent = CDCl3  
 PTS1d = 32768  
 F1 = 75.467751 MHz  
 F2 = 1.000000 MHz  
 SW1 = 22727.27 Hz

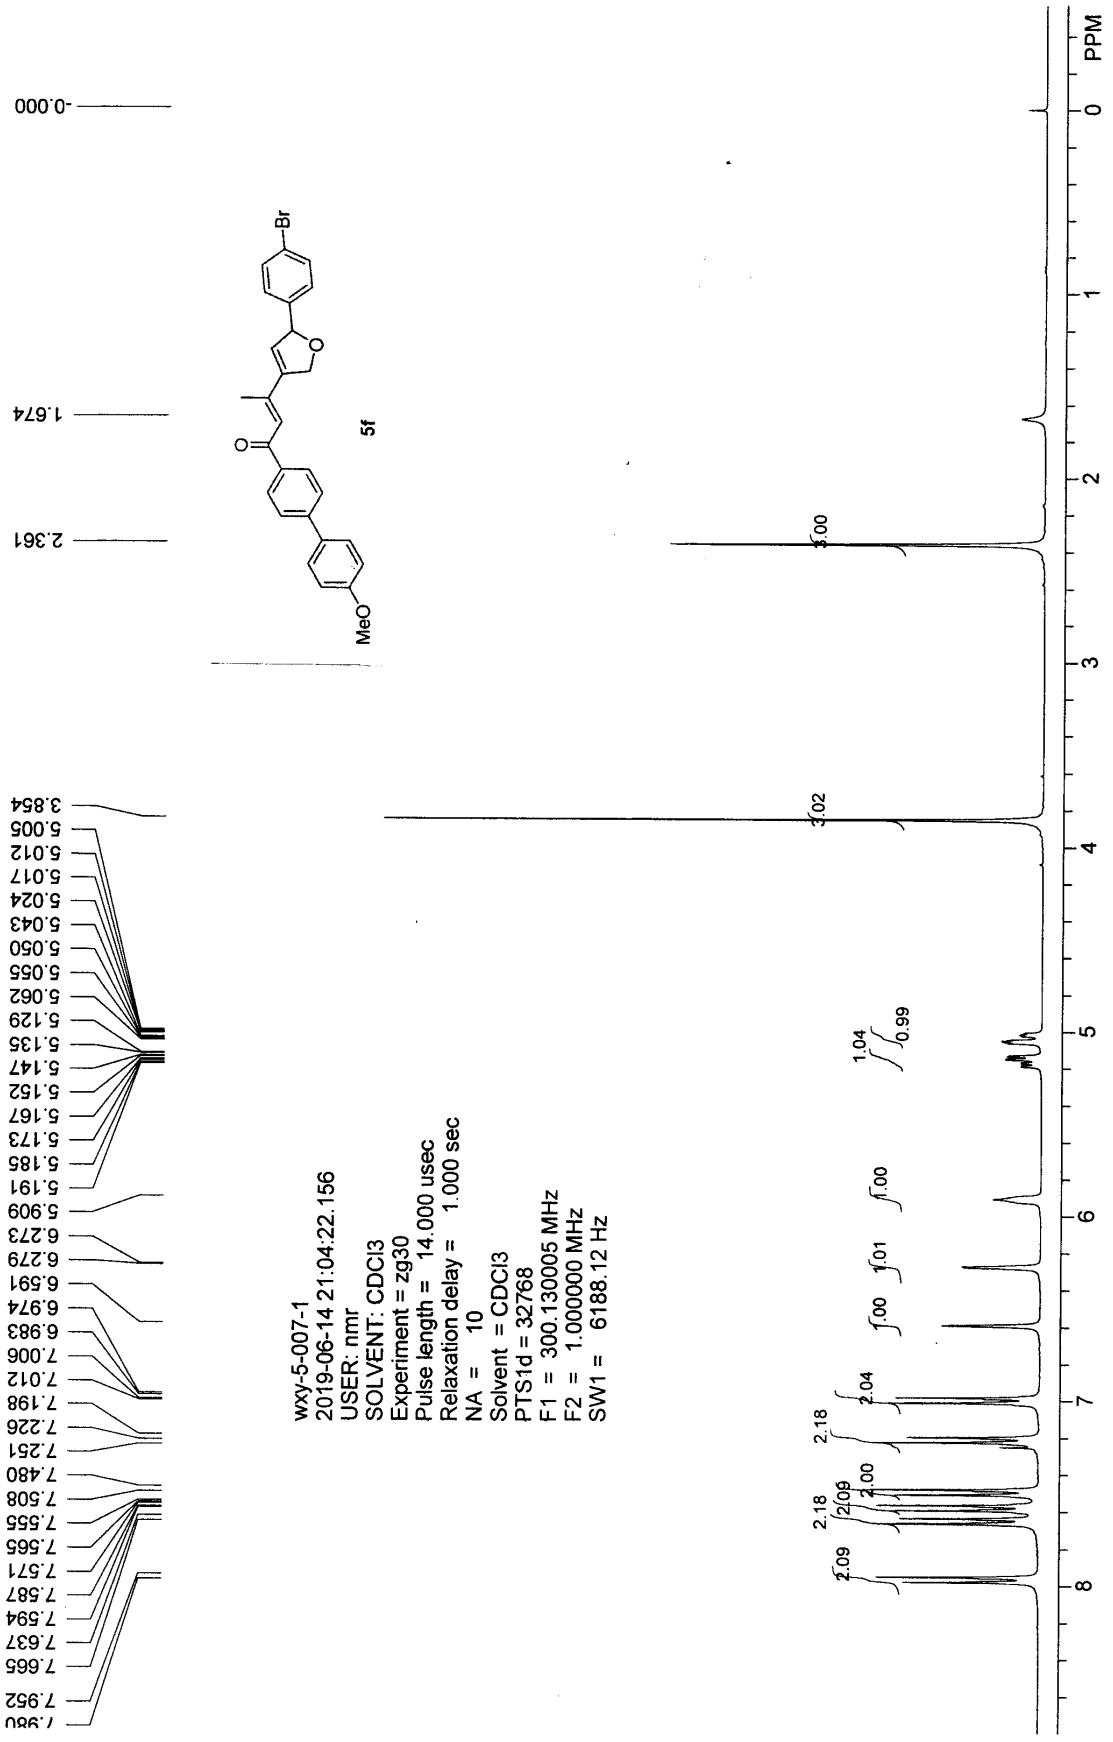

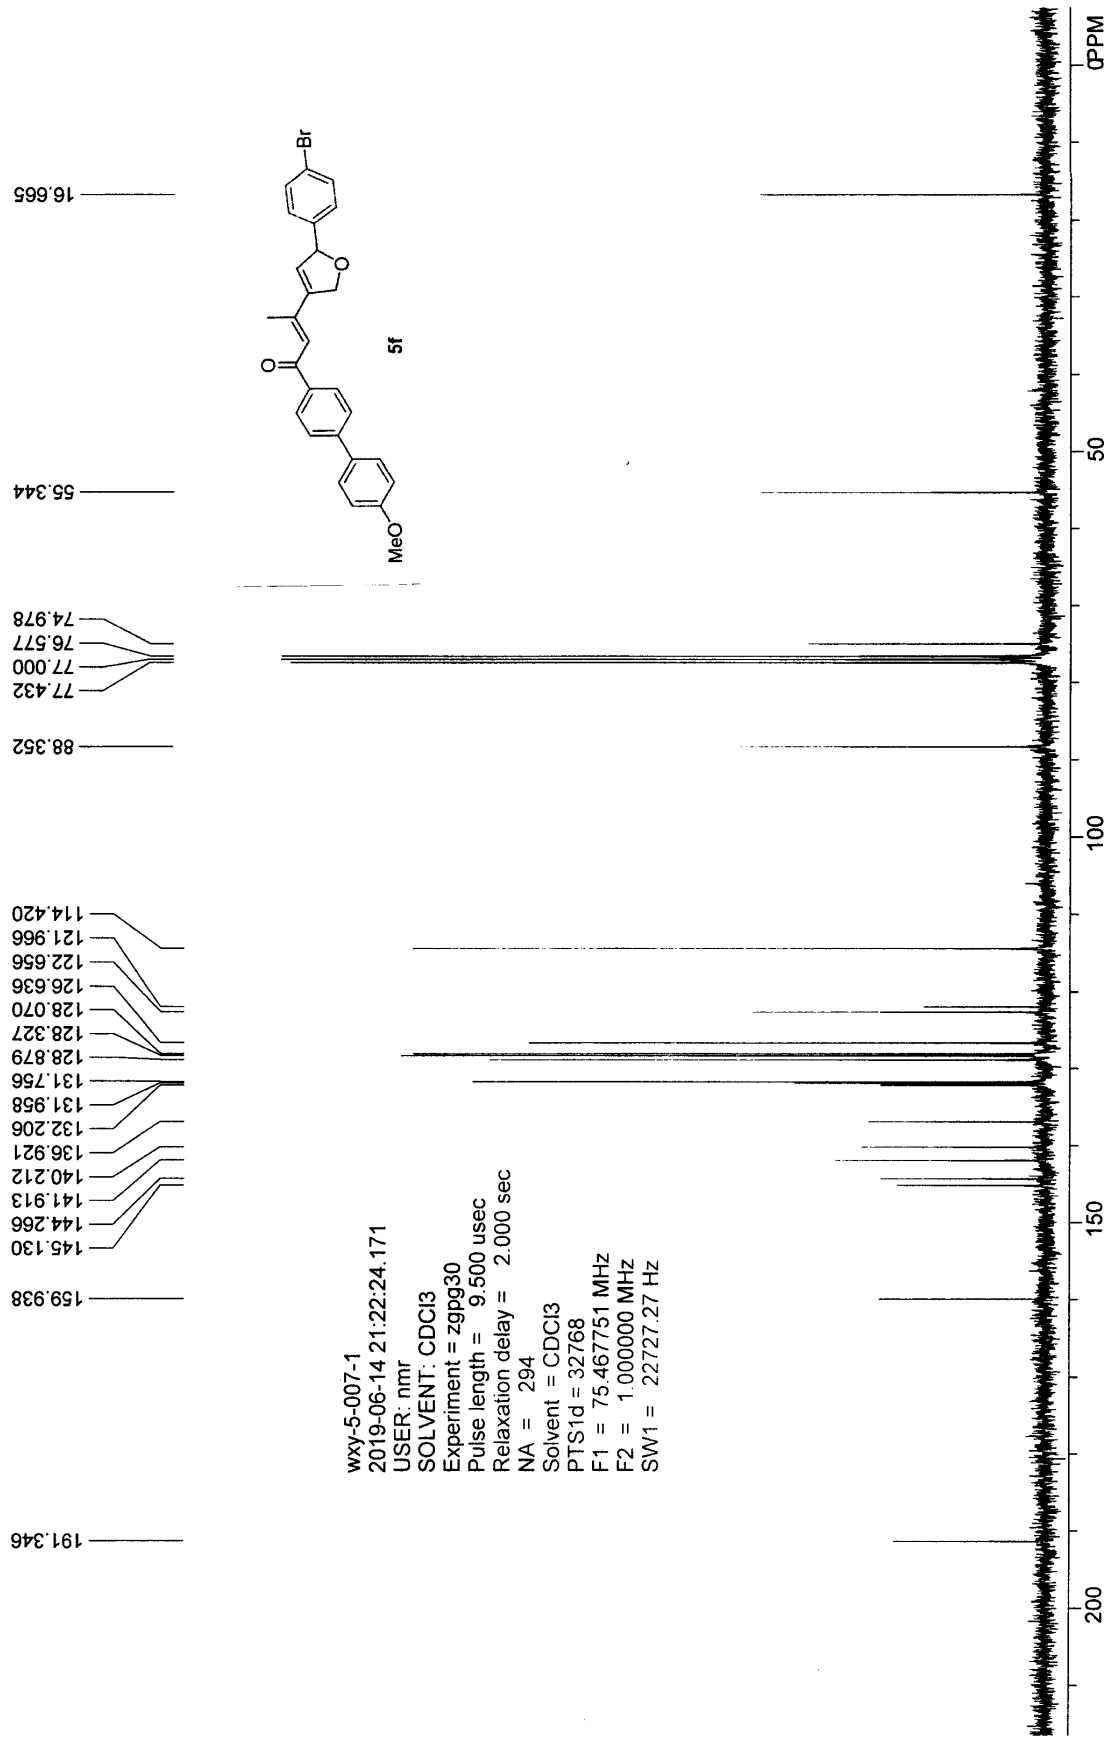

wxy-5-007-1  
 2019-06-14 21:22:24.171  
 USER: nmr  
 SOLVENT: CDCl3  
 Experiment = zgpg30  
 Pulse length = 9.500 usec  
 Relaxation delay = 2.000 sec  
 NA = 294  
 Solvent = CDCl3  
 PTS1d = 32768  
 F1 = 75.467751 MHz  
 F2 = 1.000000 MHz  
 SW1 = 22727.27 Hz

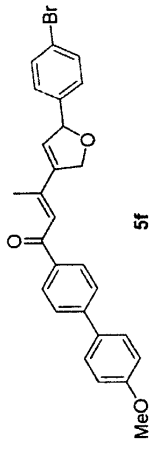

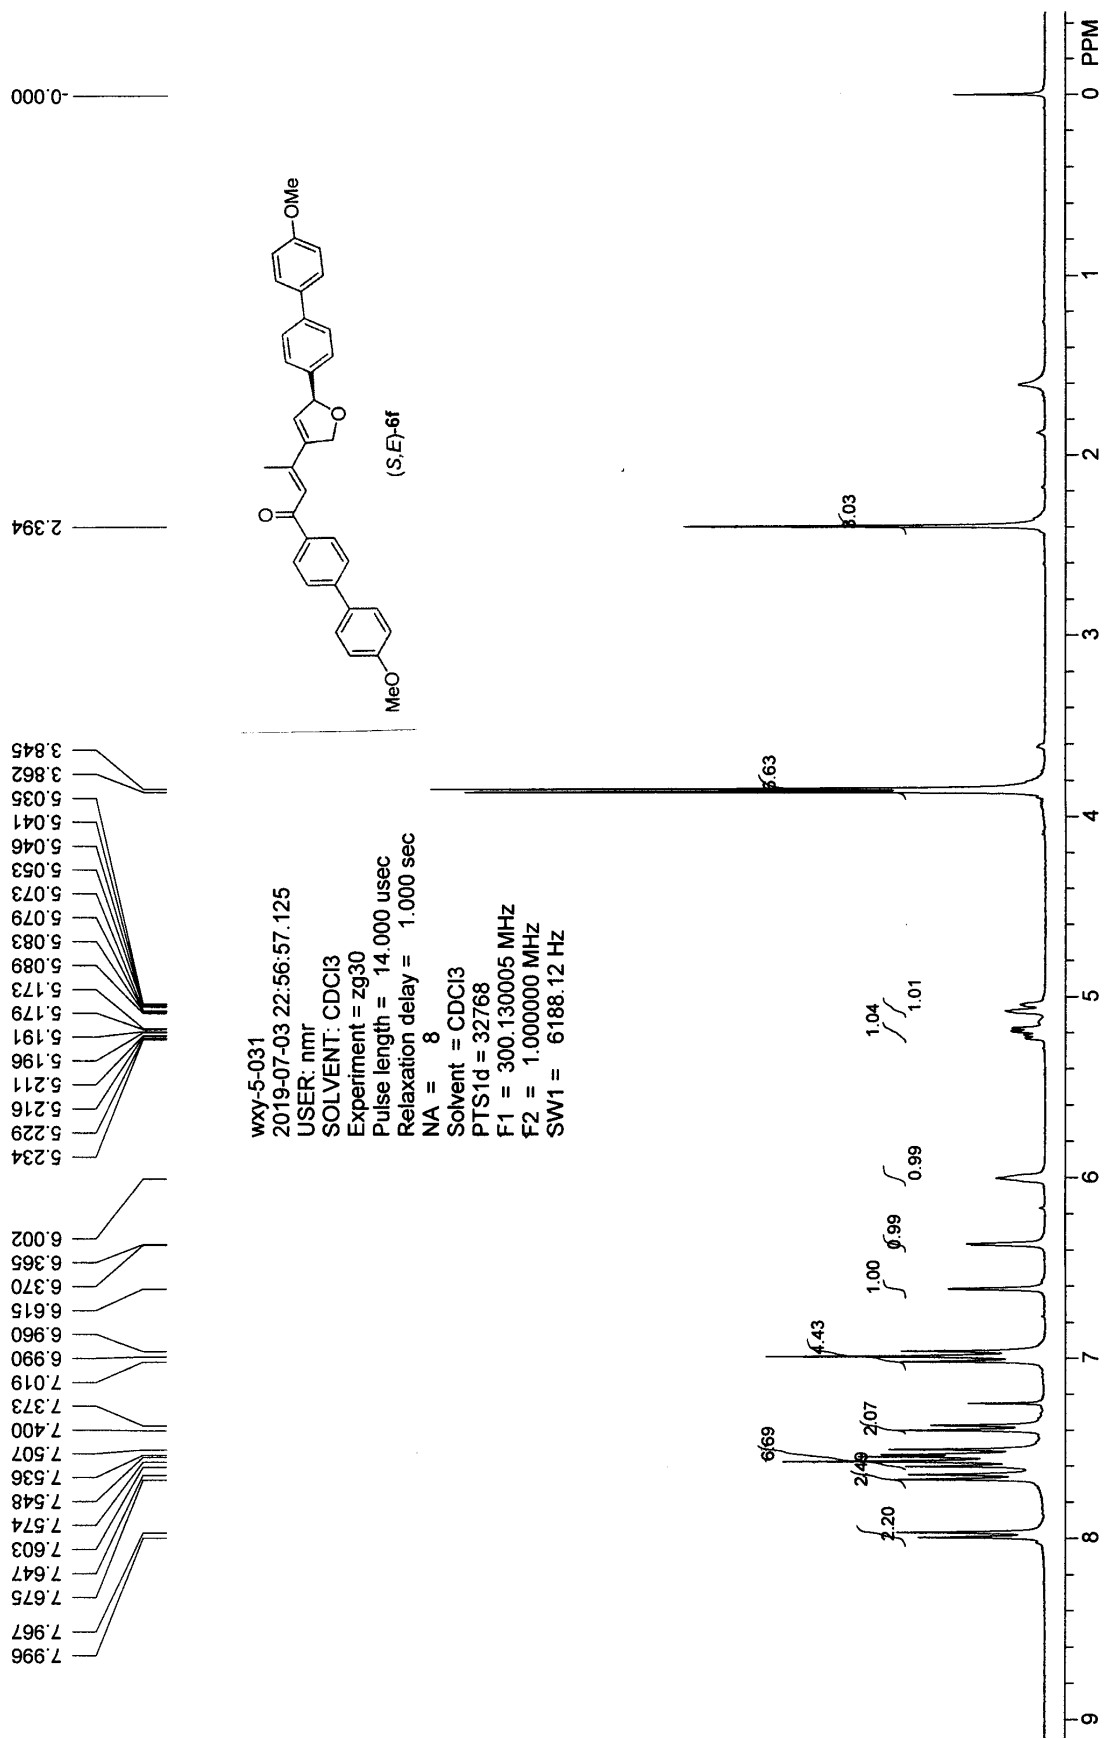

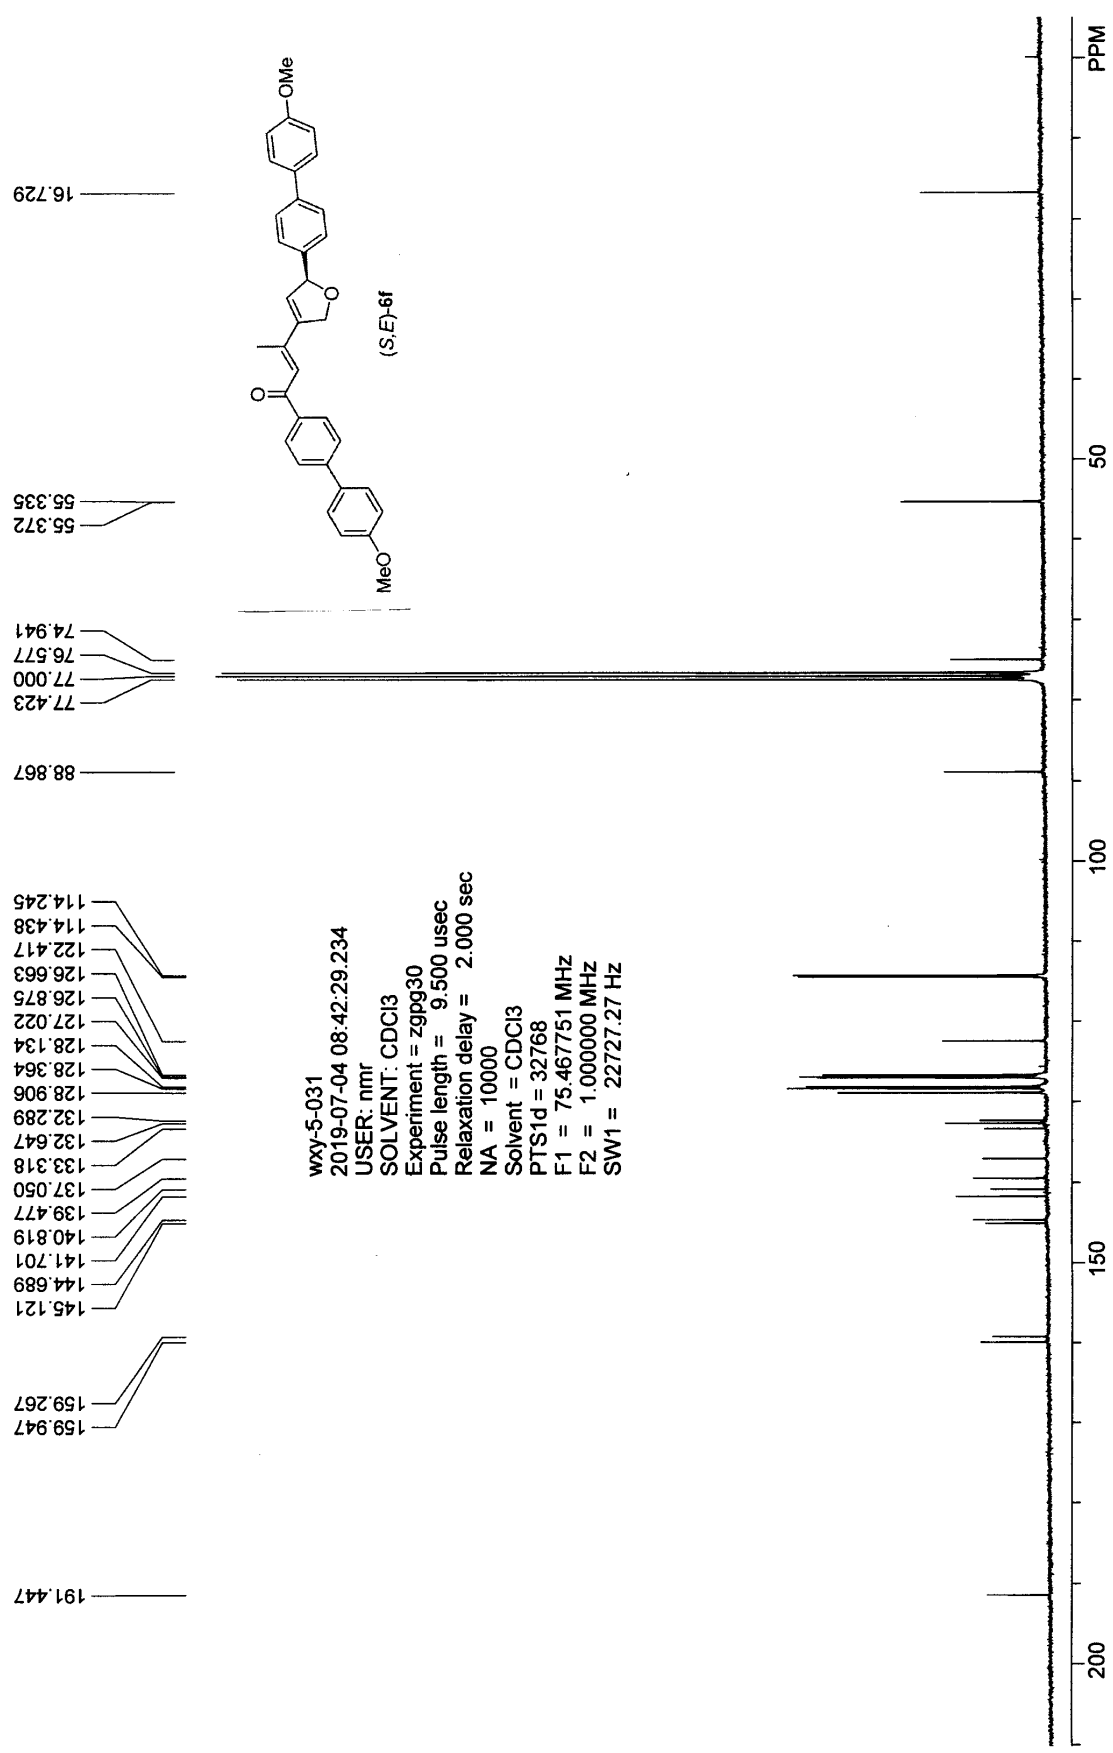

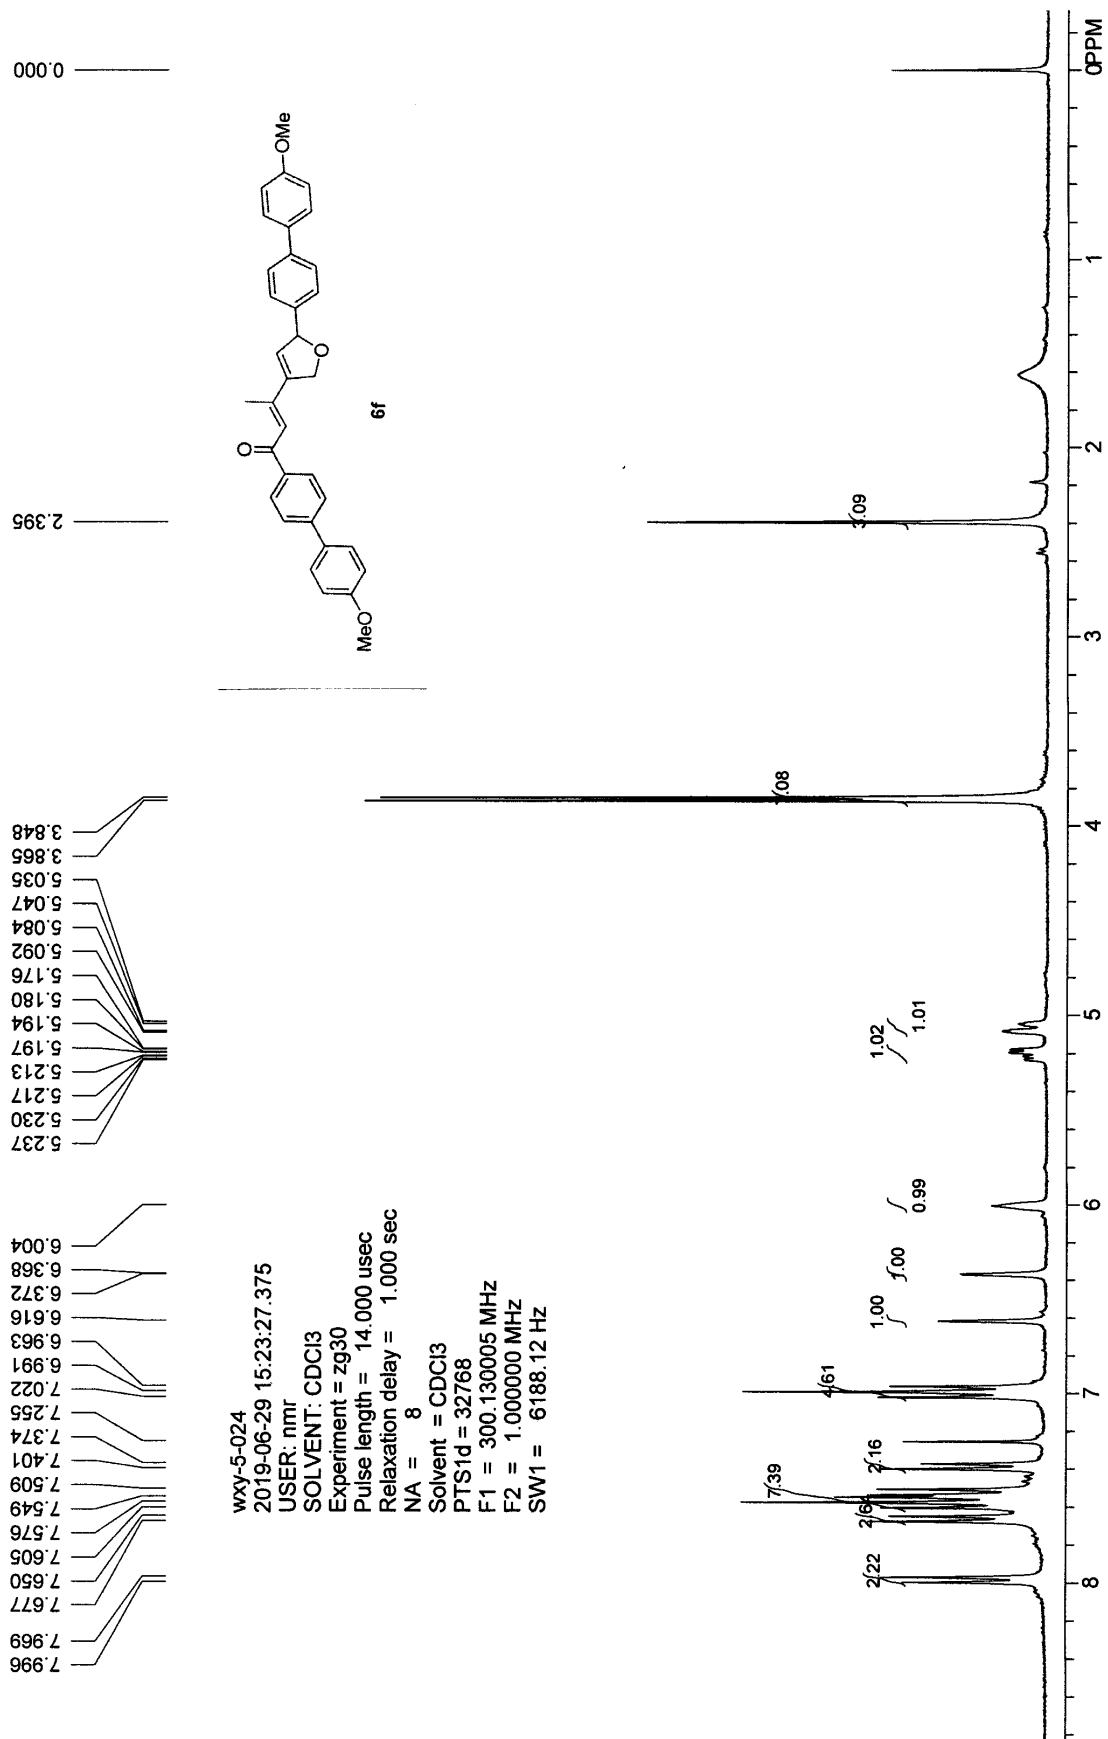

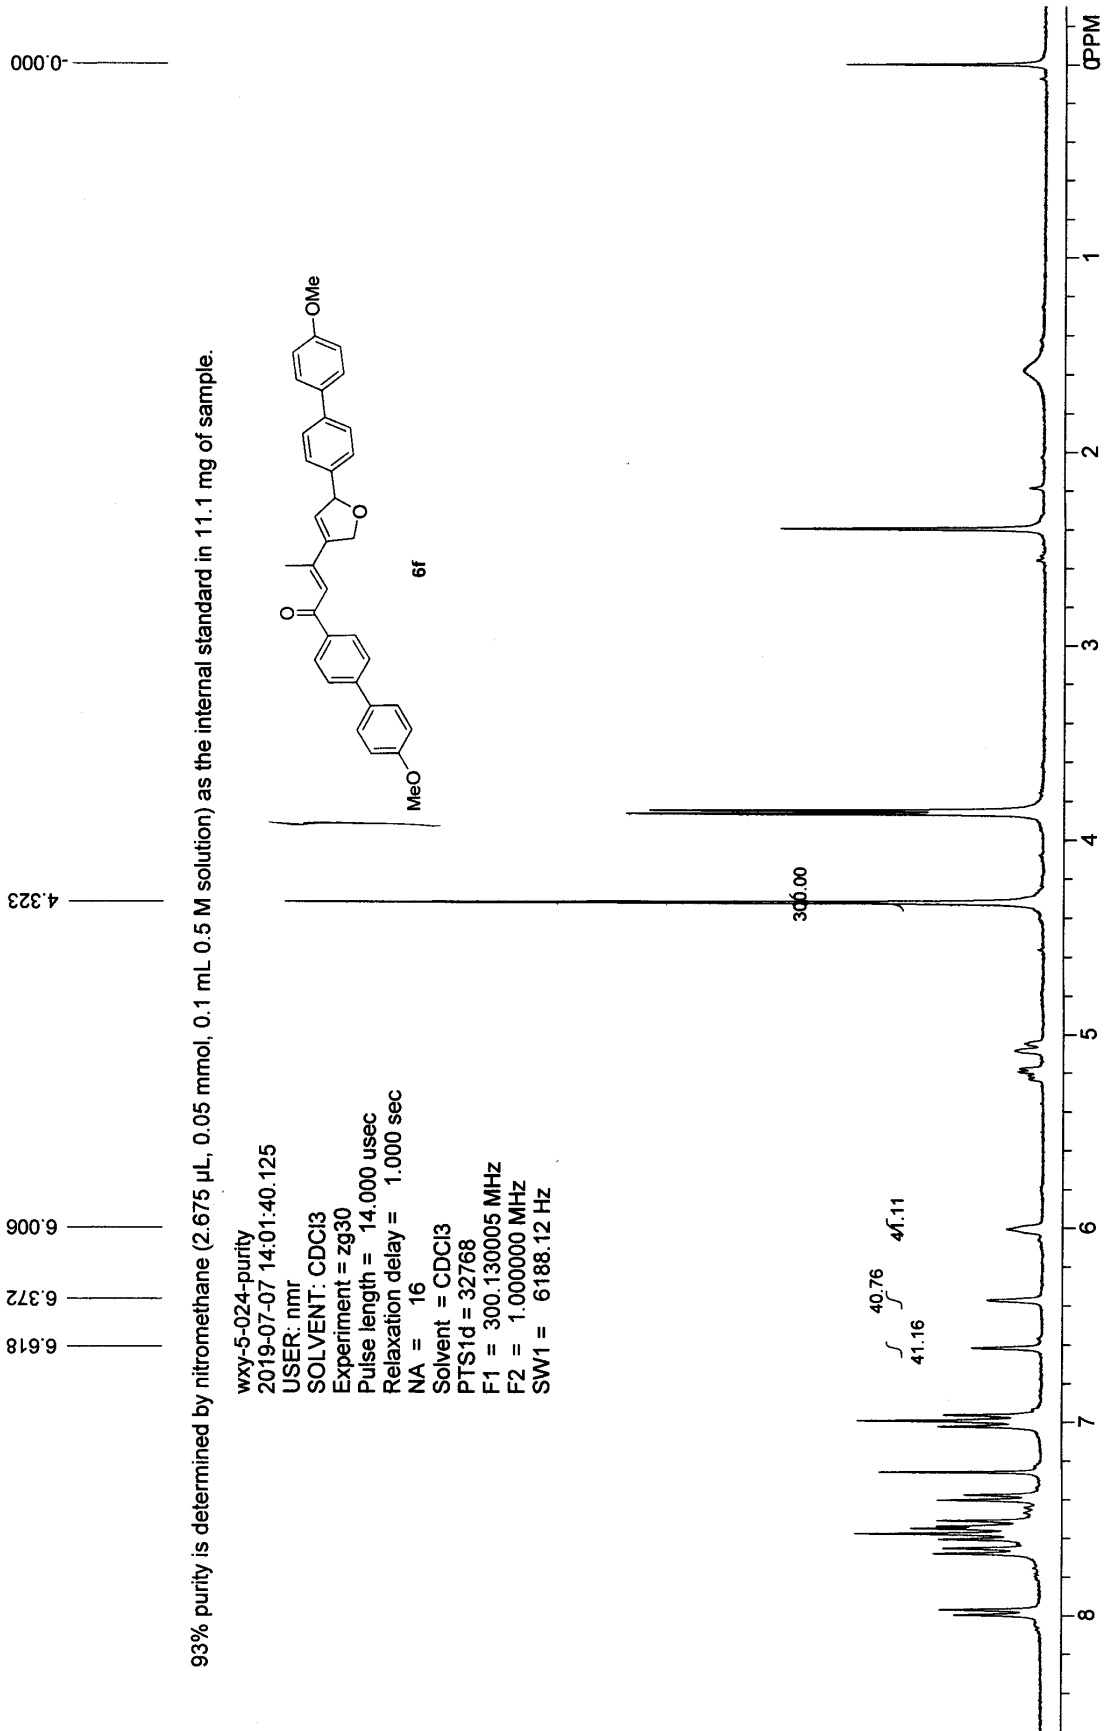



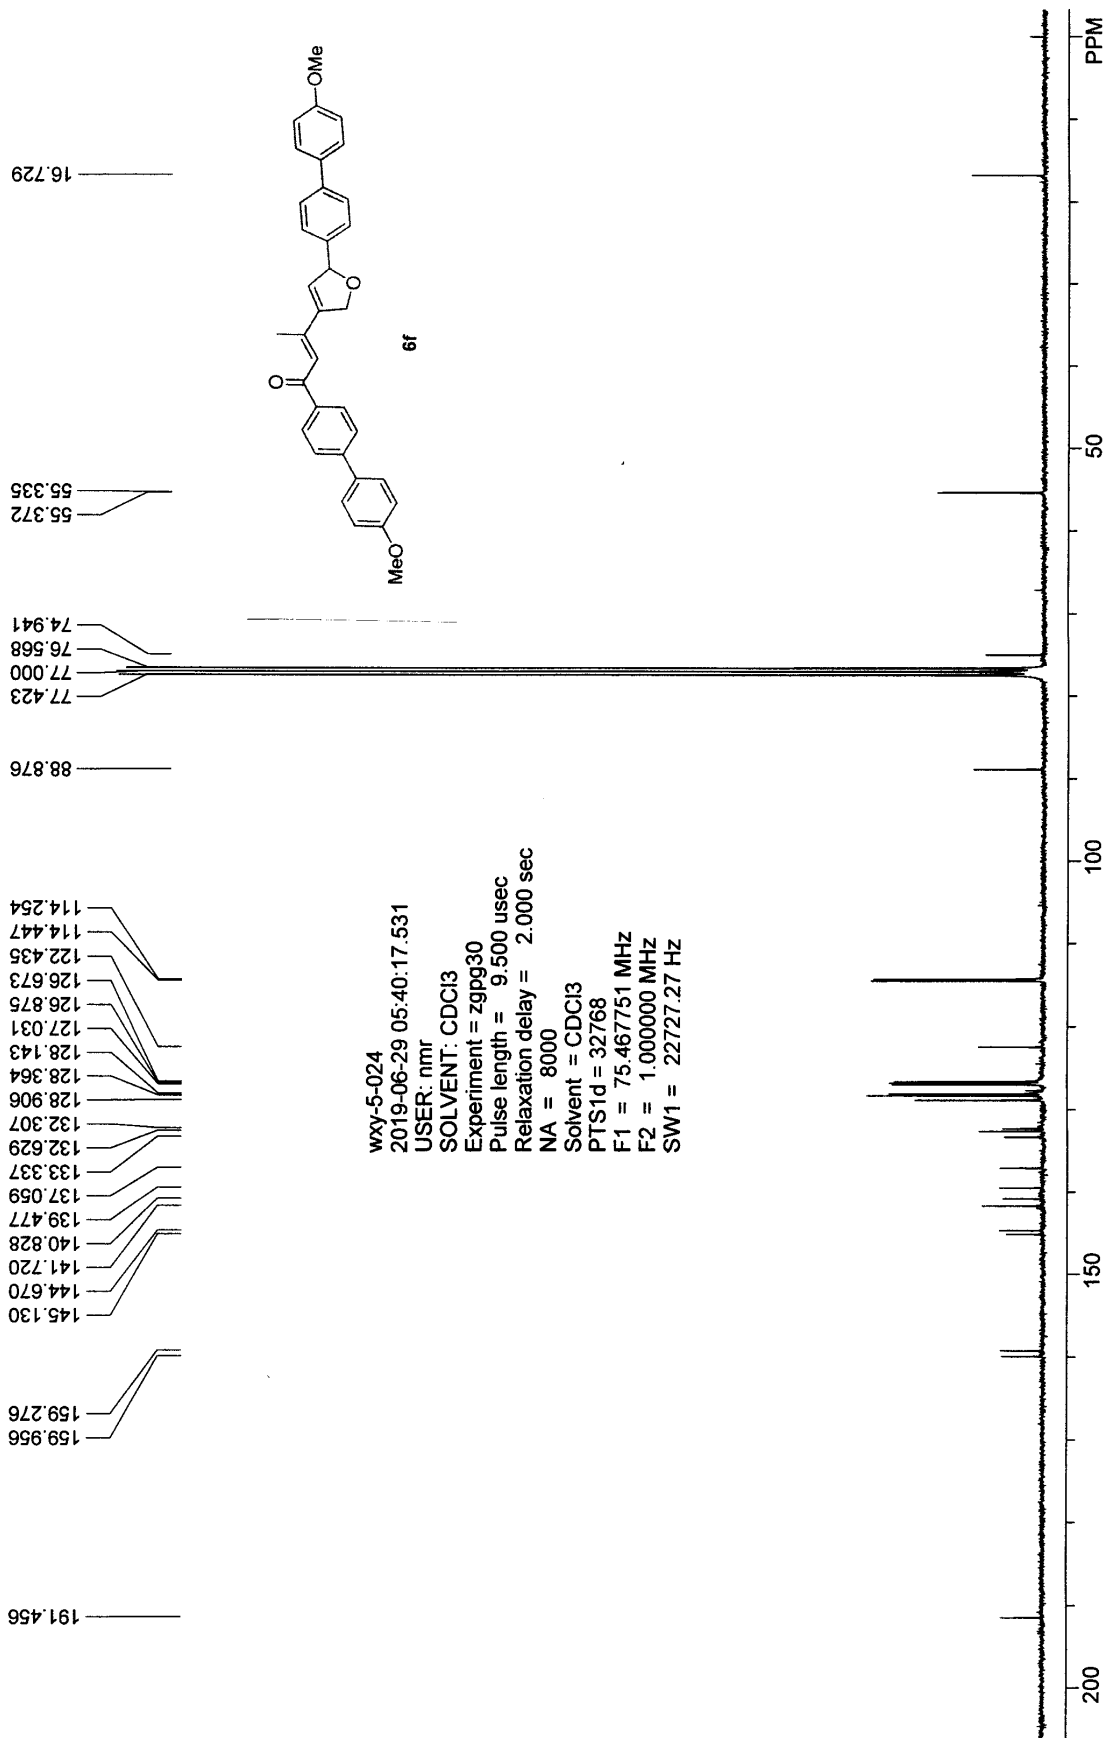

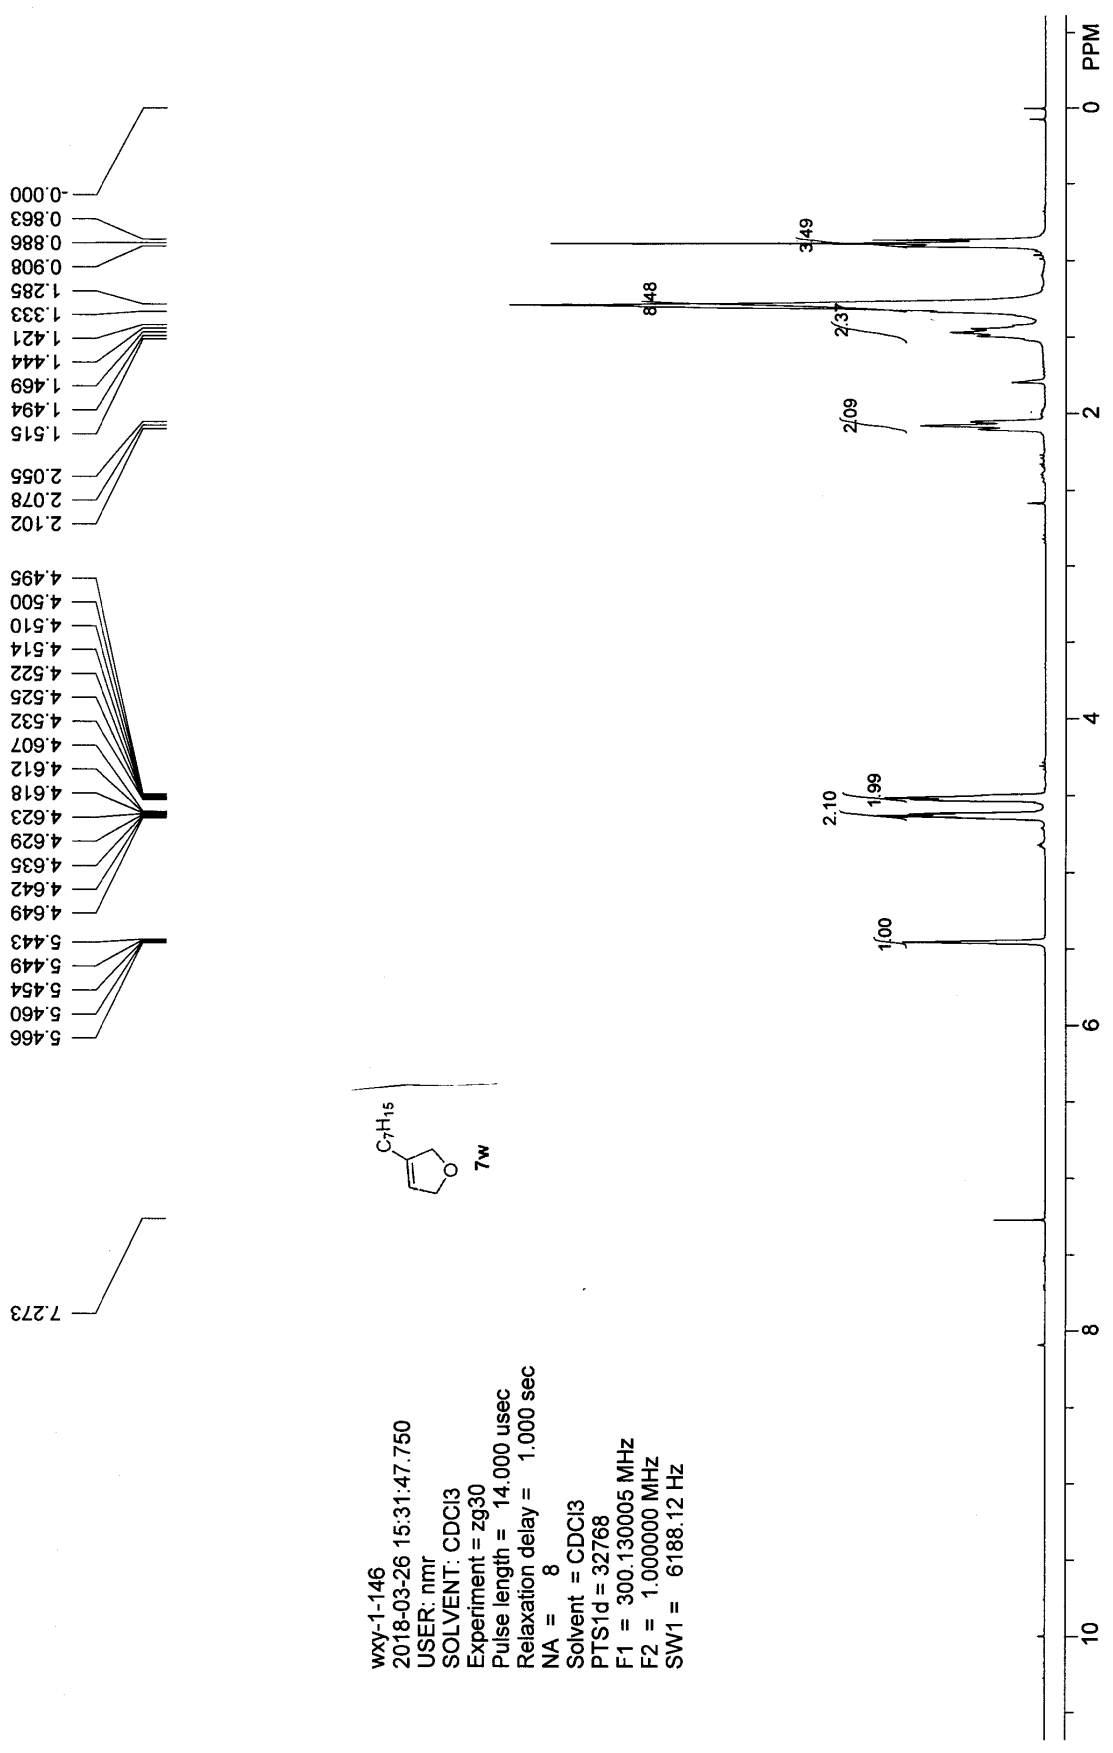

wxy-1-146  
 2018-03-26 15:31:47.750  
 USER: nmr  
 SOLVENT: CDCl3  
 Experiment = zg30  
 Pulse length = 14.000 usec  
 Relaxation delay = 1.000 sec  
 NA = 8  
 Solvent = CDCl3  
 PTS1d = 32768  
 F1 = 300.130005 MHz  
 F2 = 1.000000 MHz  
 SW1 = 6188.12 Hz

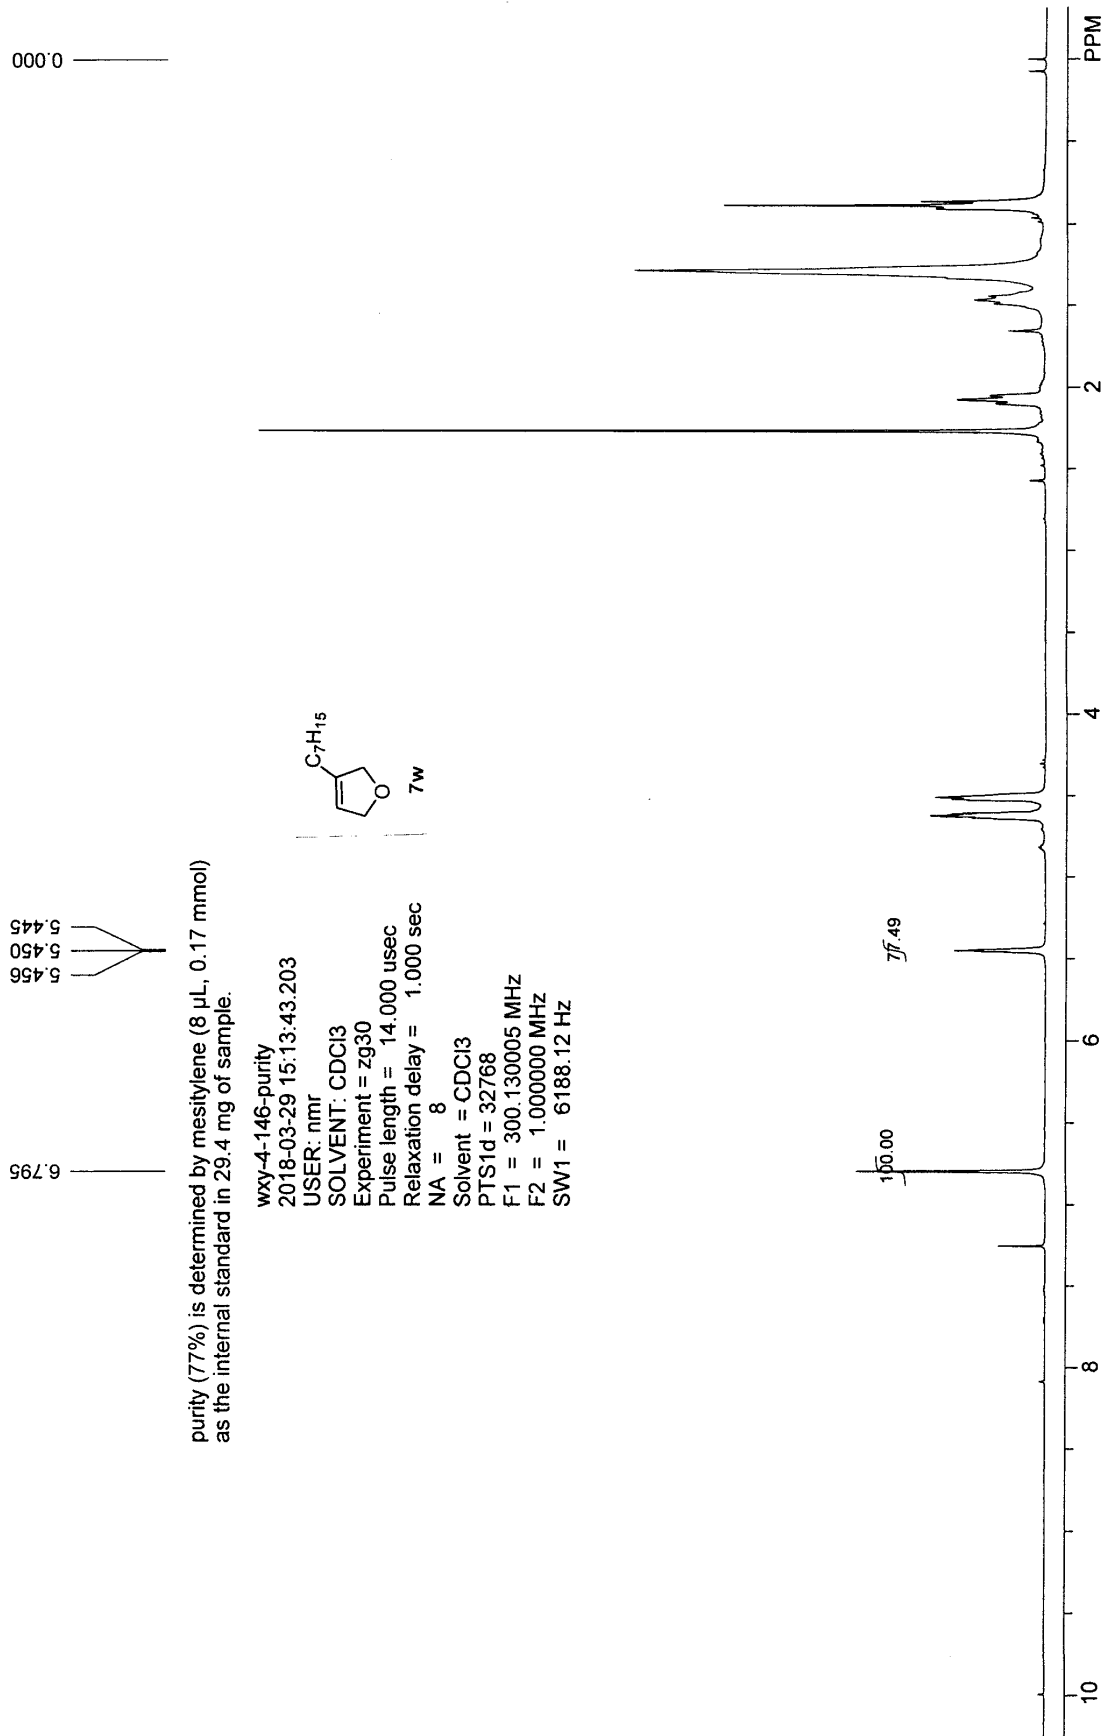

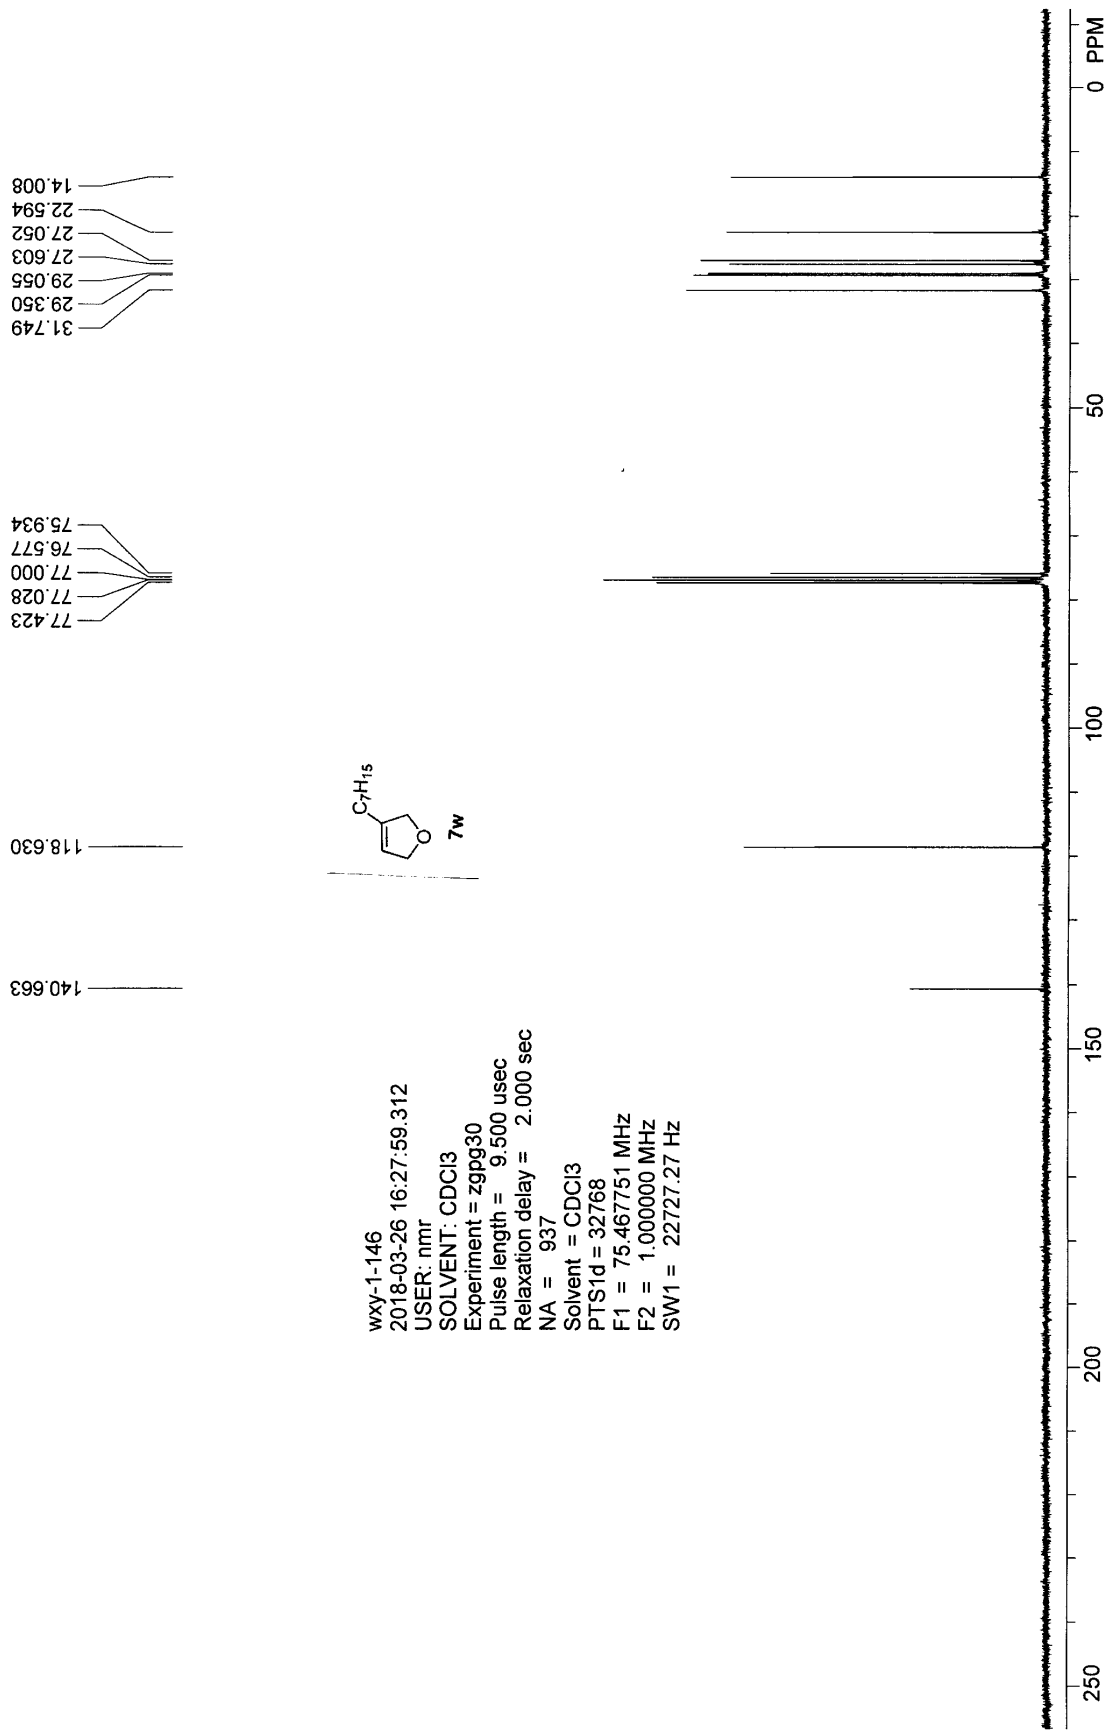

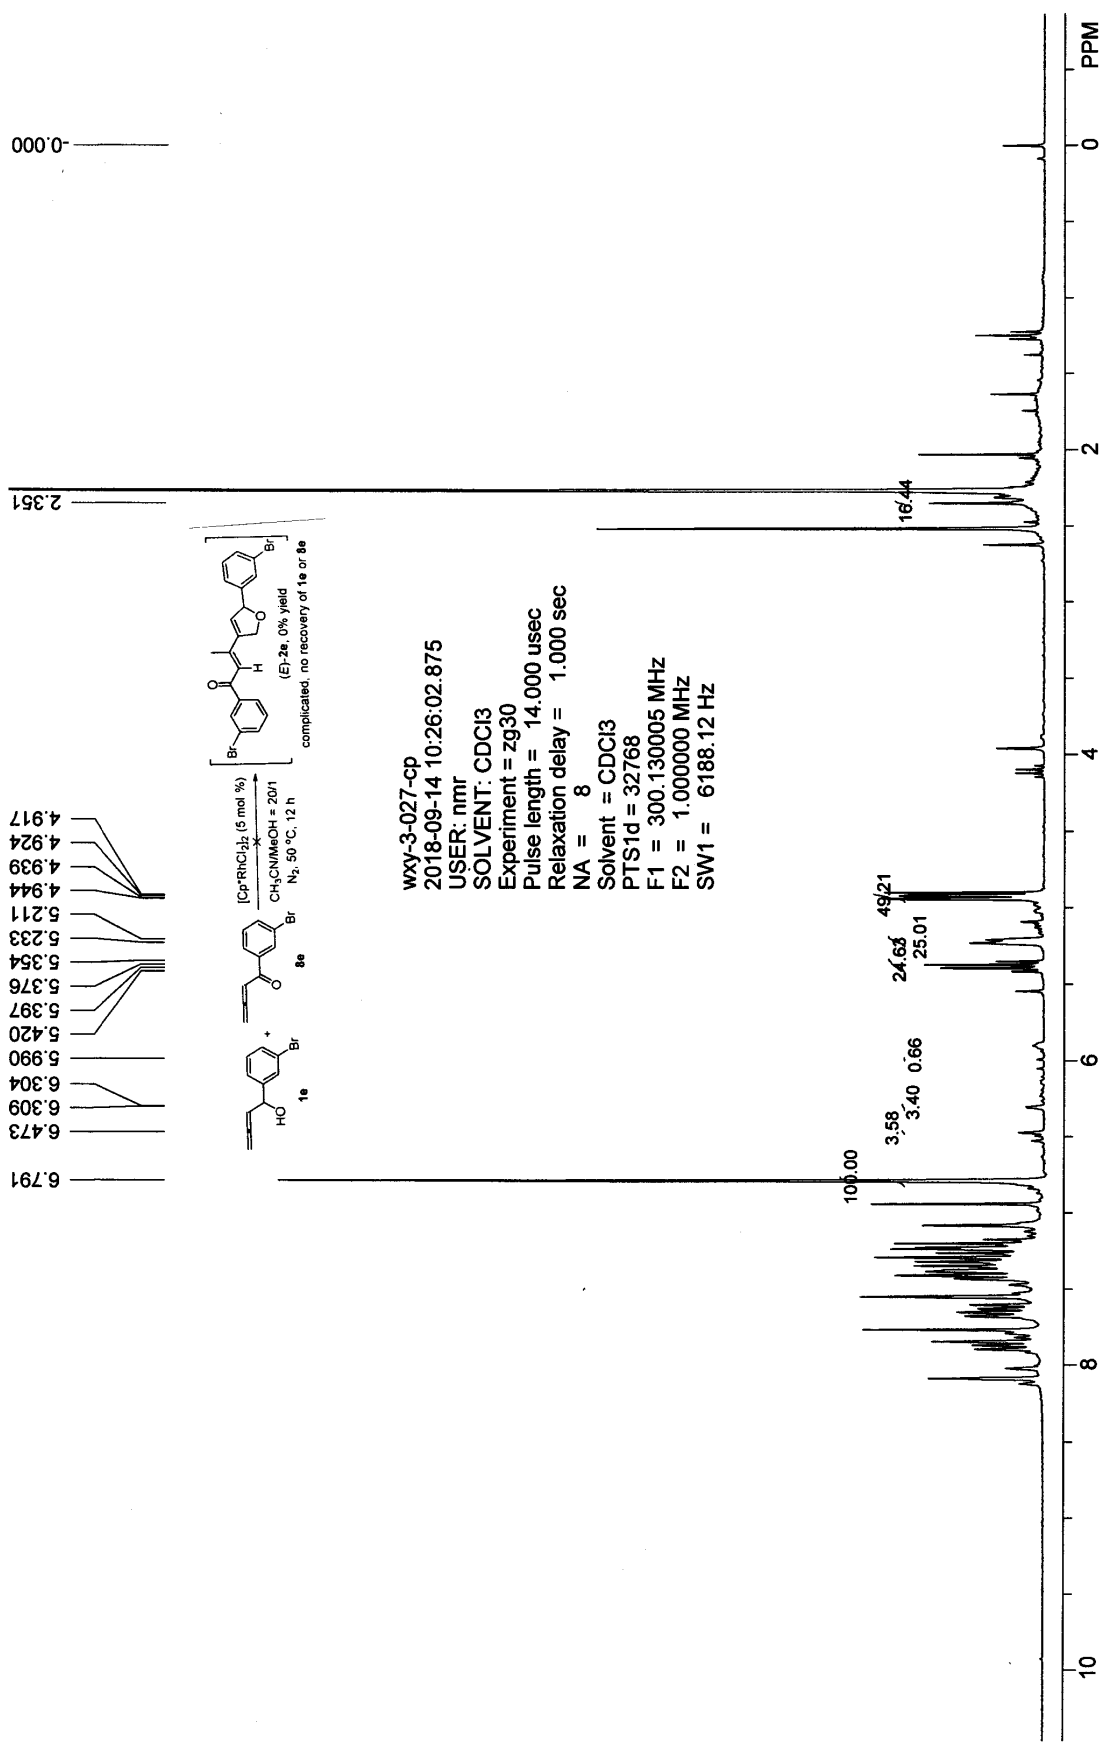

wxy-3-027-cp  
 2018-09-14 10:26:02.875  
 USER: nmr  
 SOLVENT: CDCl3  
 Experiment = zq30  
 Pulse length = 14.000 usec  
 Relaxation delay = 1.000 sec  
 NA = 8  
 Solvent = CDCl3  
 PTS1d = 32768  
 F1 = 300.130005 MHz  
 F2 = 1.000000 MHz  
 SW1 = 6188.12 Hz

0.000

5.881  
5.620  
5.591  
5.508  
5.479

6.804

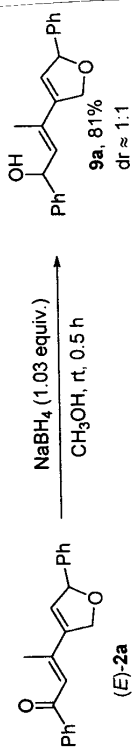

wxy-3-158-cp  
2018-12-25 15:20:51.656  
USER: nmr  
SOLVENT: CDCl<sub>3</sub>  
Experiment = zg30  
Pulse length = 14.000 usec  
Relaxation delay = 1.000 sec  
NA = 8  
Solvent = CDCl<sub>3</sub>  
PTS1d = 32768  
F1 = 300.130005 MHz  
F2 = 1.000000 MHz  
SW1 = 6188.12 Hz

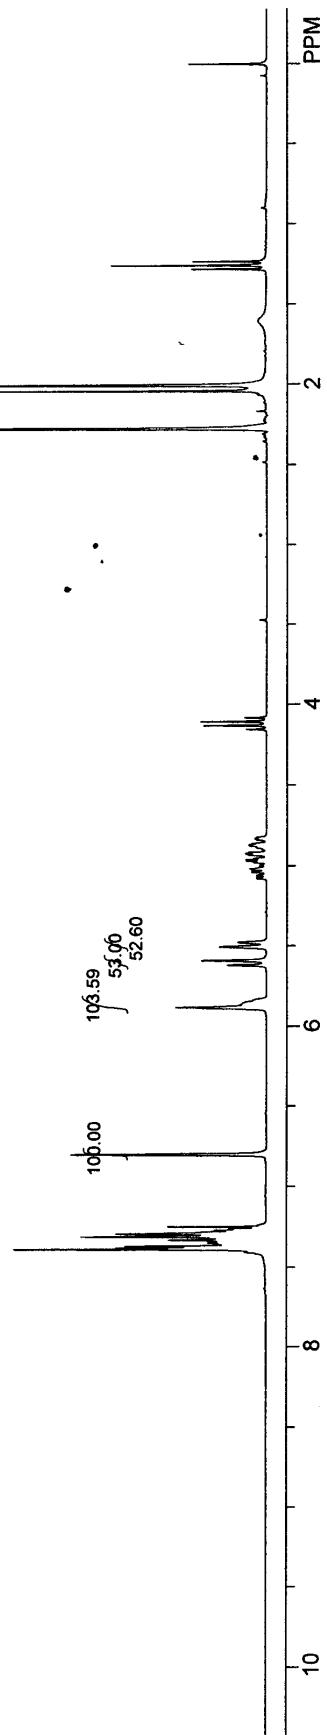

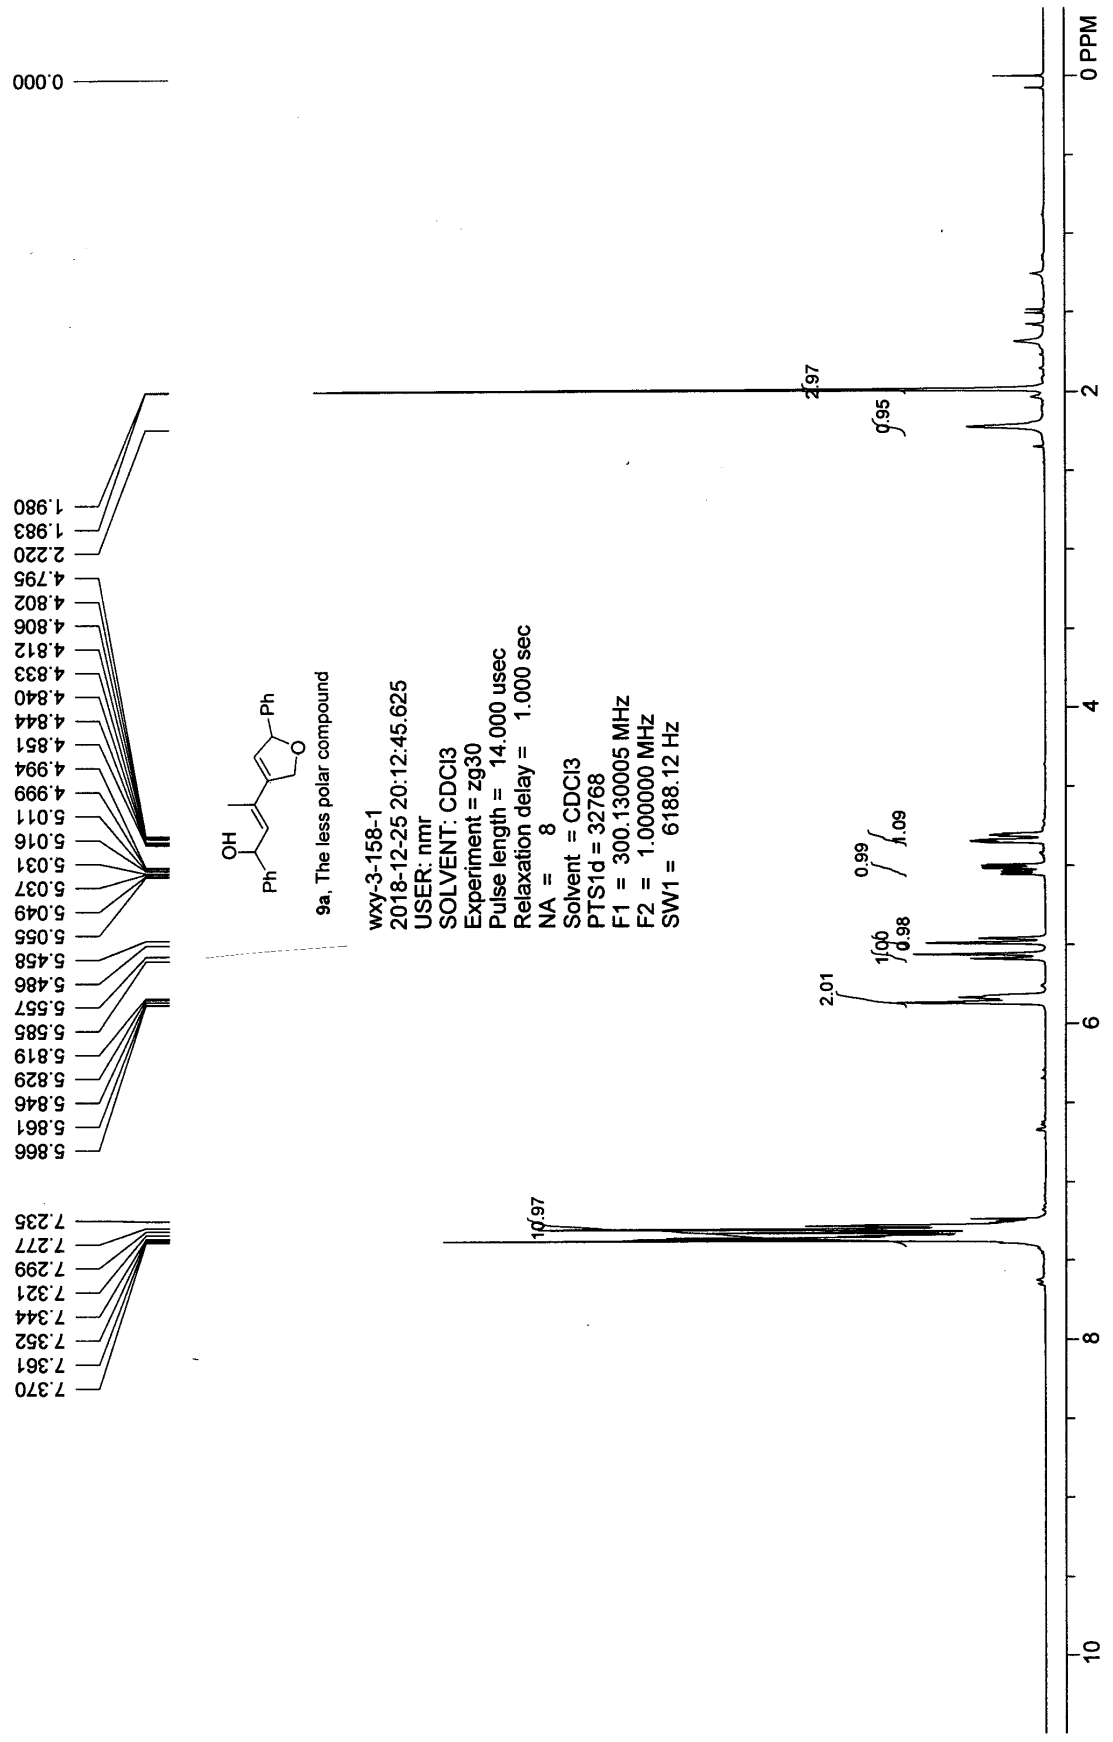

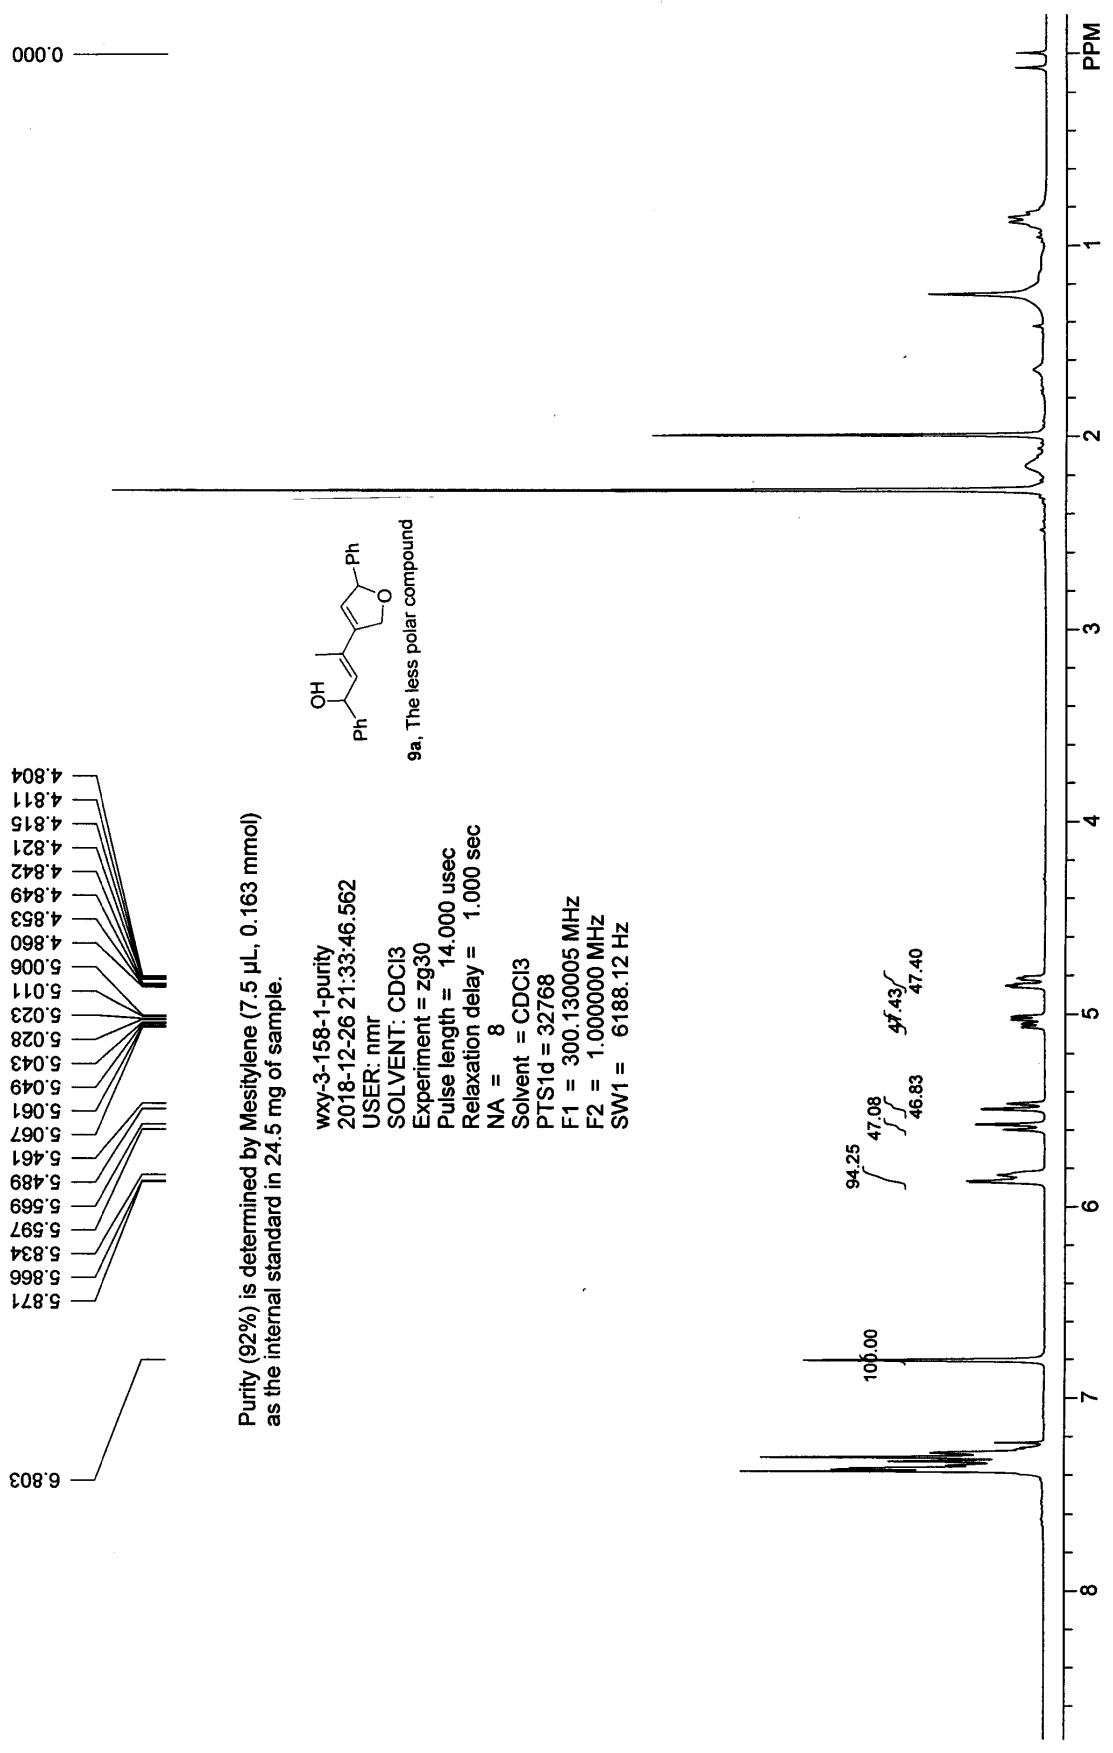



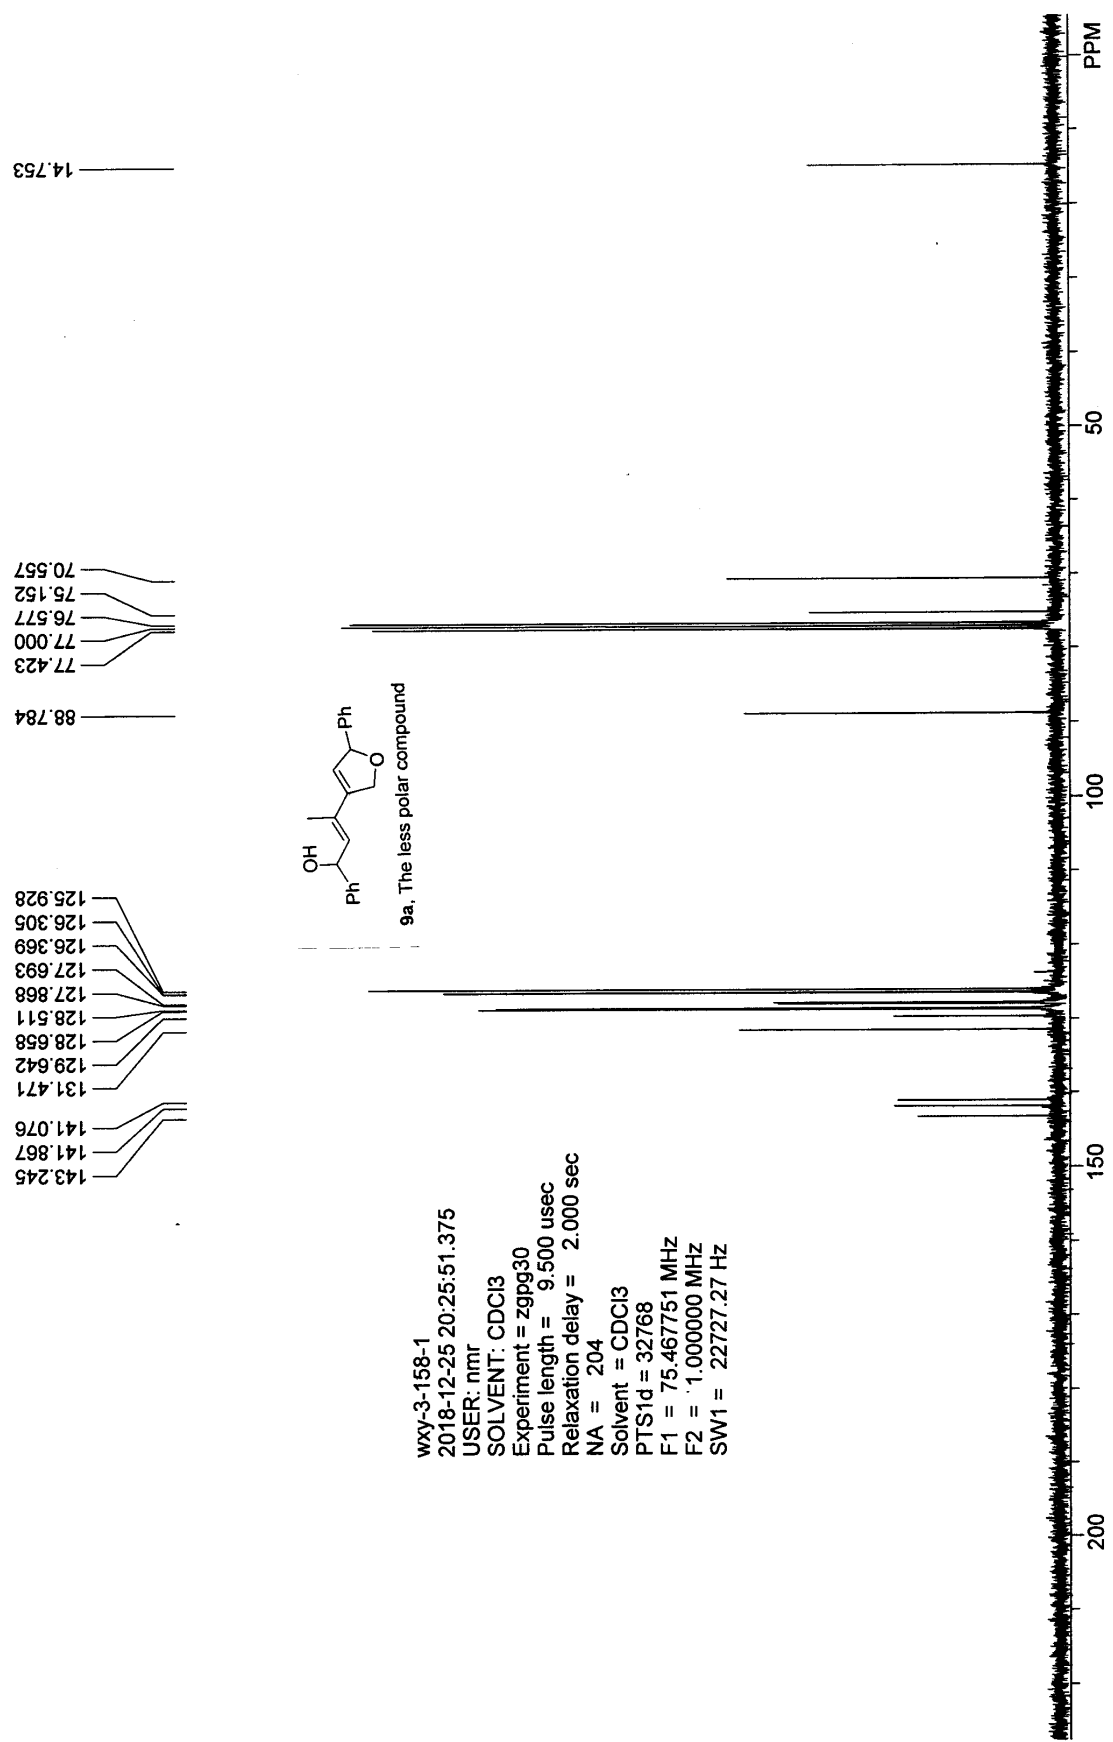

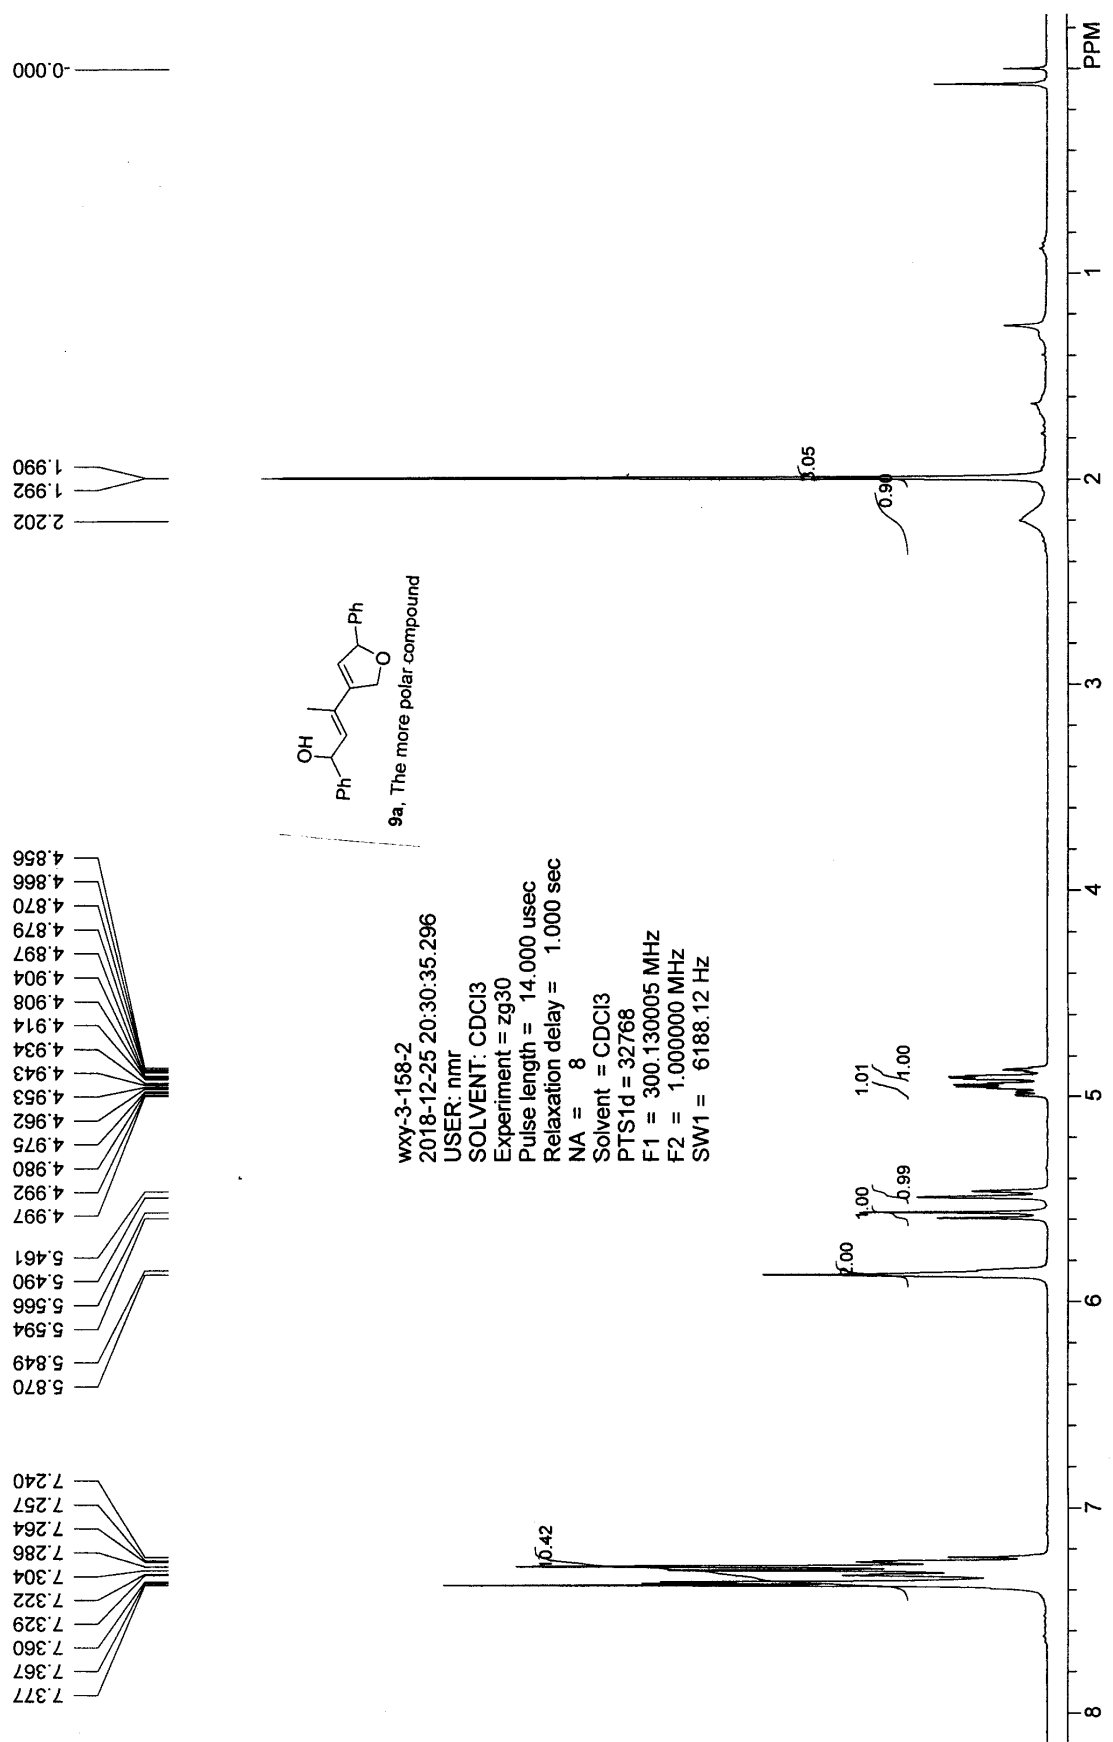

0.000

6.805  
5.868  
5.597  
5.569  
5.486  
5.459  
4.946  
4.912

Purity (95%) is determined by Mesitylene (7.5  $\mu$ L, 0.163 mmol)  
as the internal standard in 25.7 mg of sample.

wxy-3-158-2-purity  
2018-12-26 21:40:22.843  
USER: nmr  
SOLVENT: CDCl3  
Experiment = zg30  
Pulse length = 14.000 usec  
Relaxation delay = 1.000 sec  
NA = 8  
Solvent = CDCl3  
PTSD = 32768  
F1 = 300.130005 MHz  
F2 = 1.000000 MHz  
SW1 = 6188.12 Hz

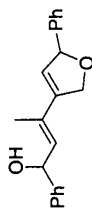

9a. The more polar compound

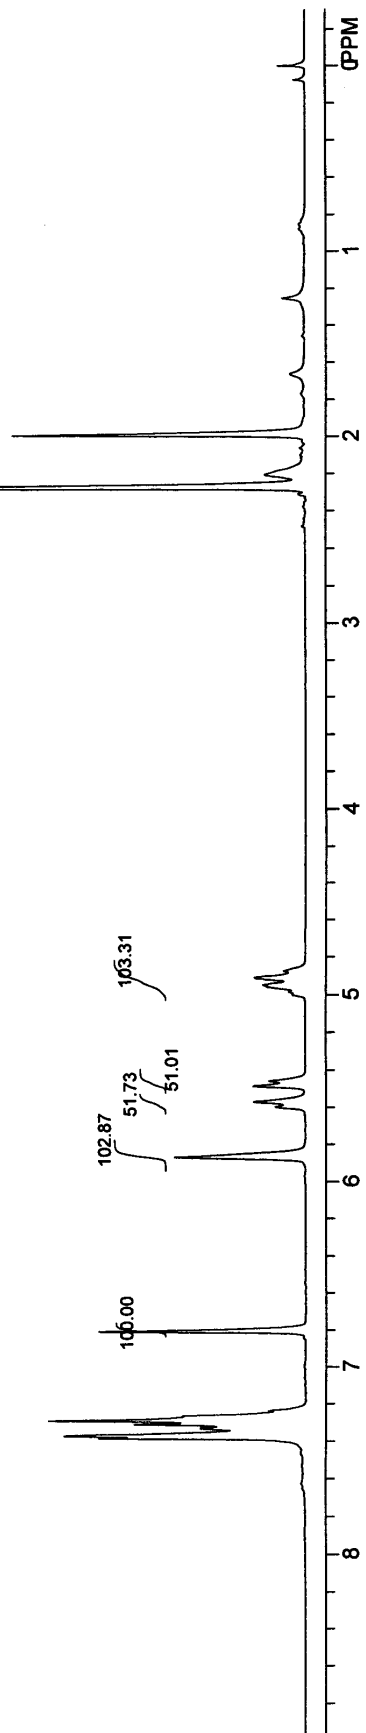

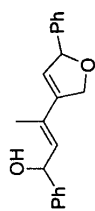

wxy-3-158-2  
 2018-12-25 20:45:51.140  
 USER: nmr  
 SOLVENT: CDCl3  
 Experiment = zgpg30  
 Pulse length = 9.500 usec  
 Relaxation delay = 2.000 sec  
 NA = 245  
 Solvent = CDCl3  
 PTS1d = 32768  
 F1 = 75.467751 MHz  
 F2 = 1.000000 MHz  
 SW1 = 22727.27 Hz

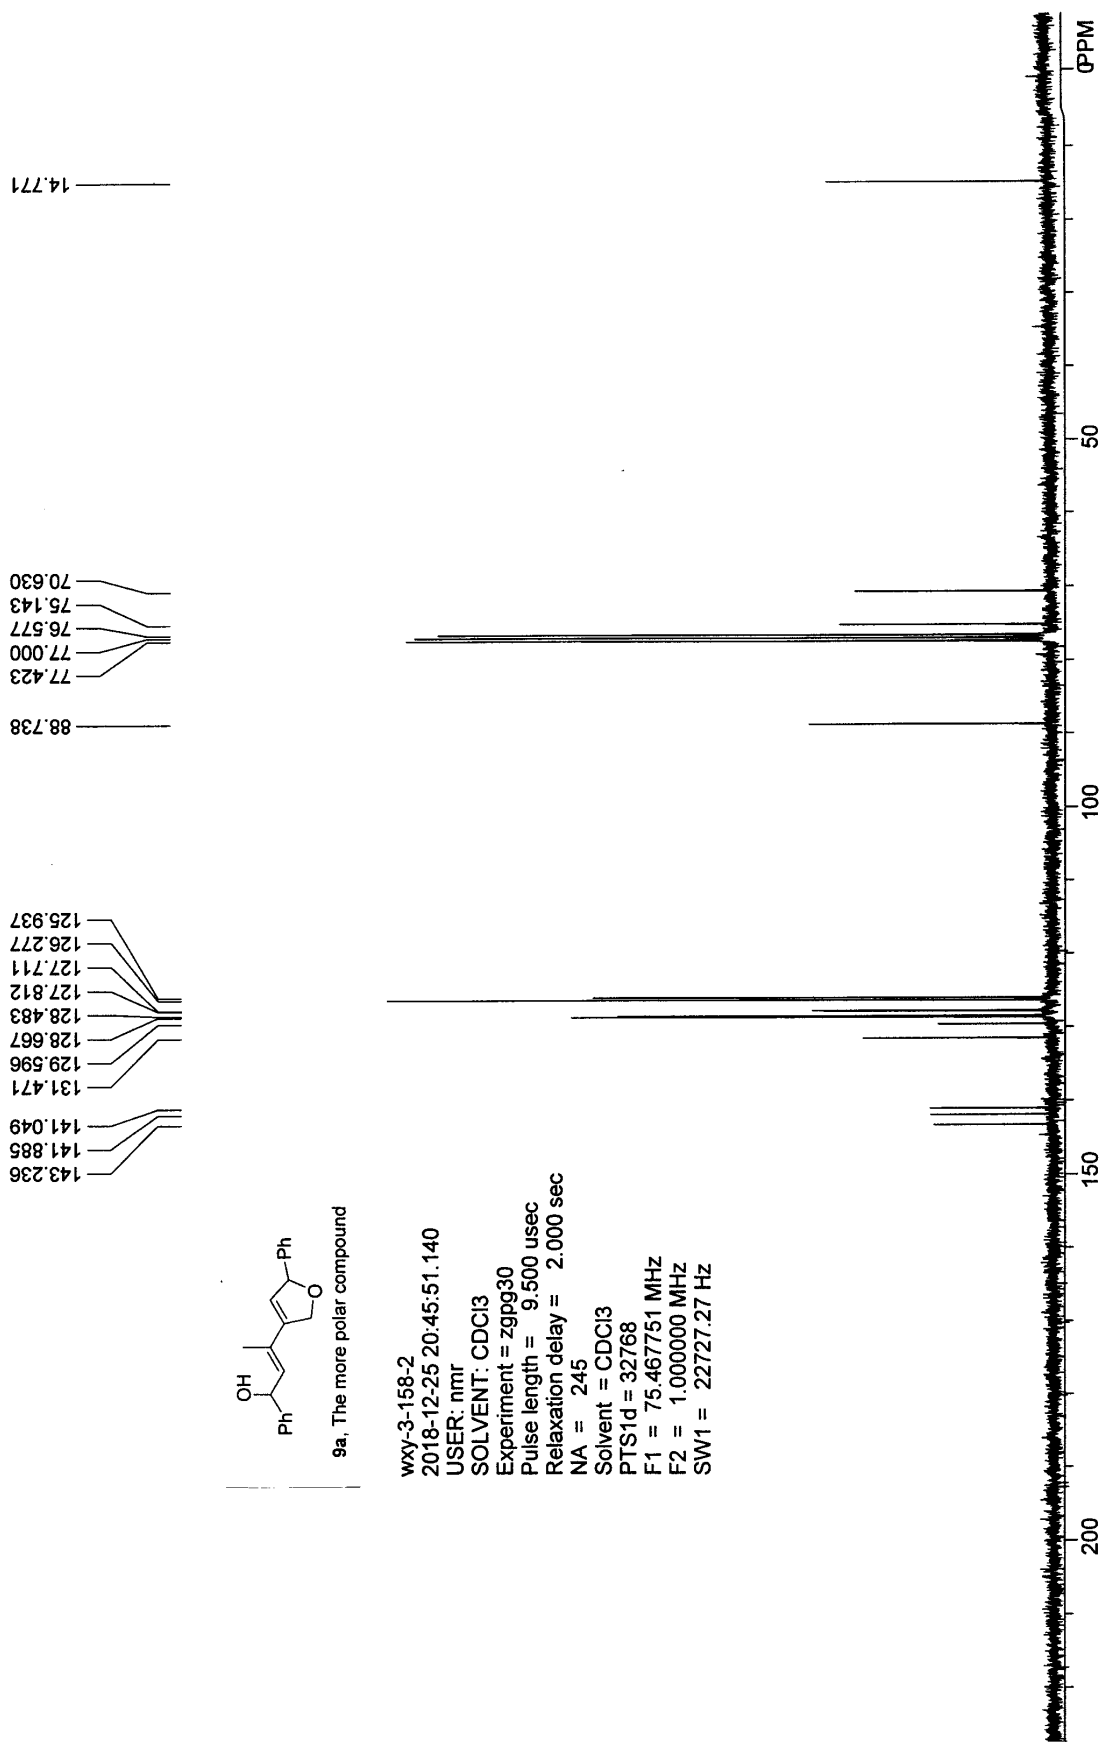

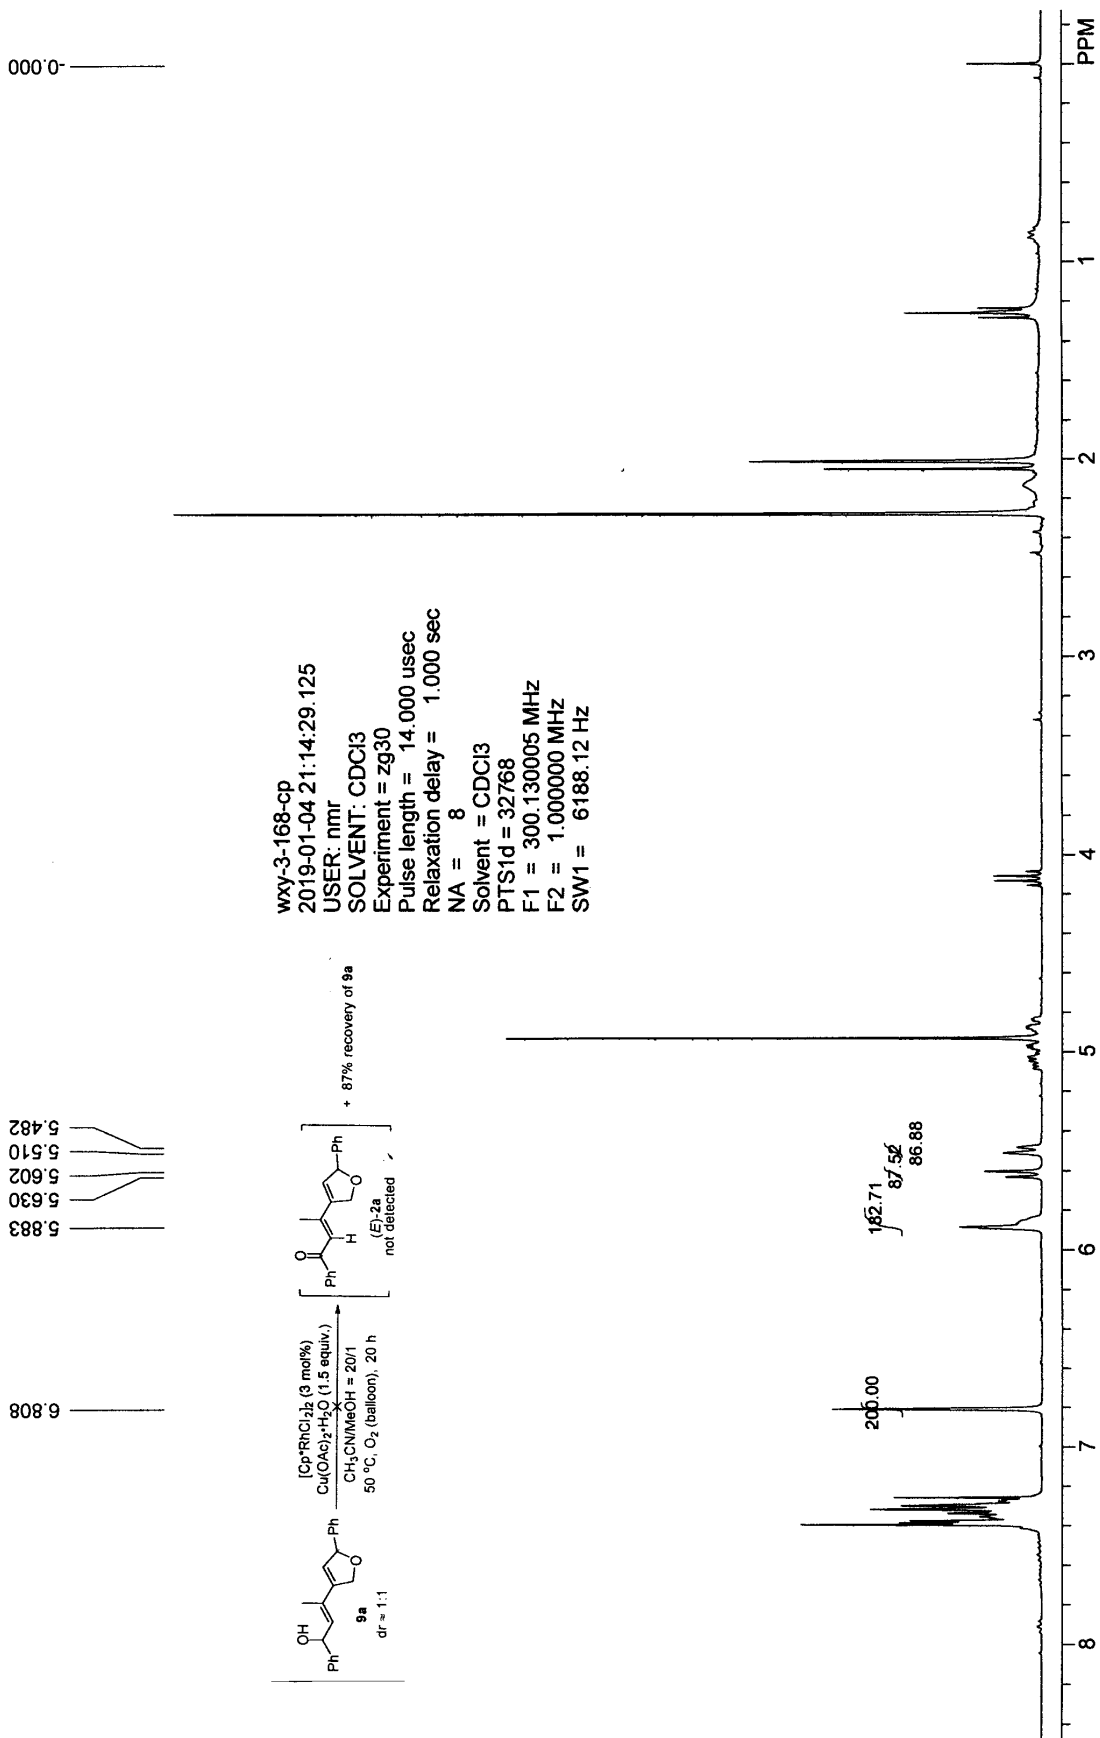

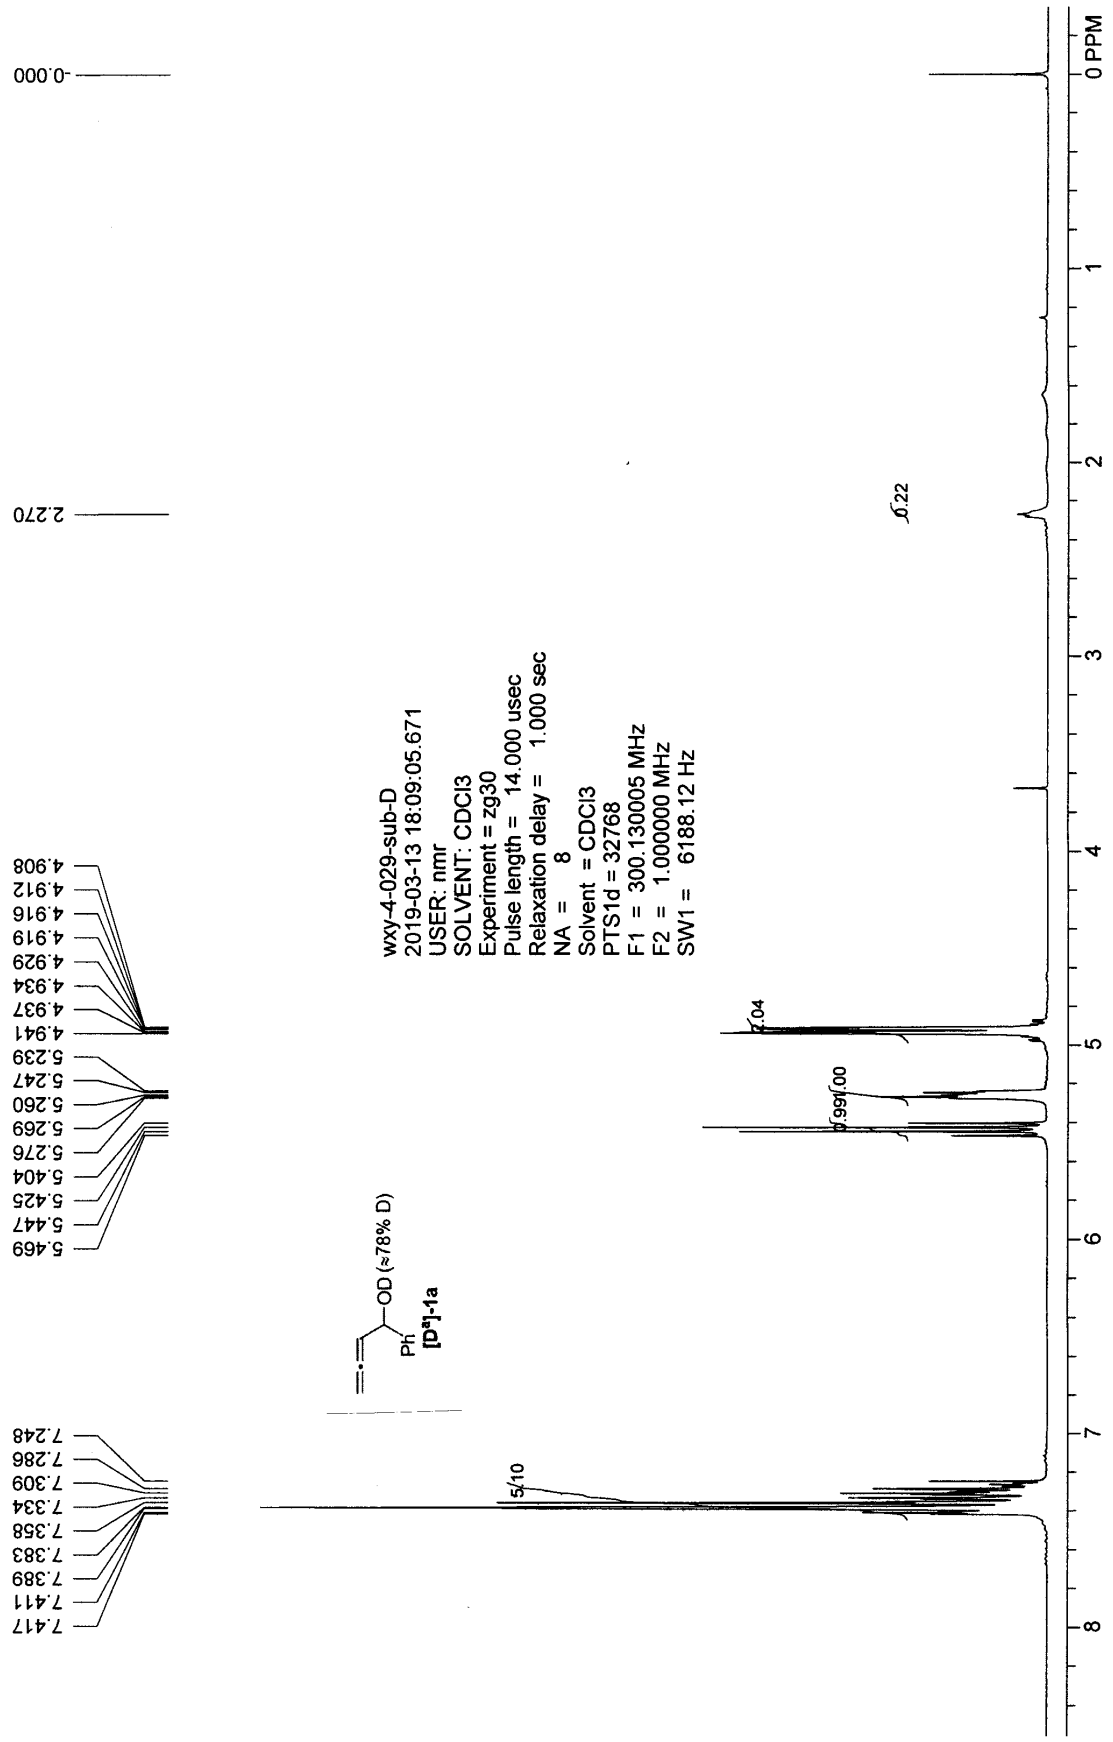

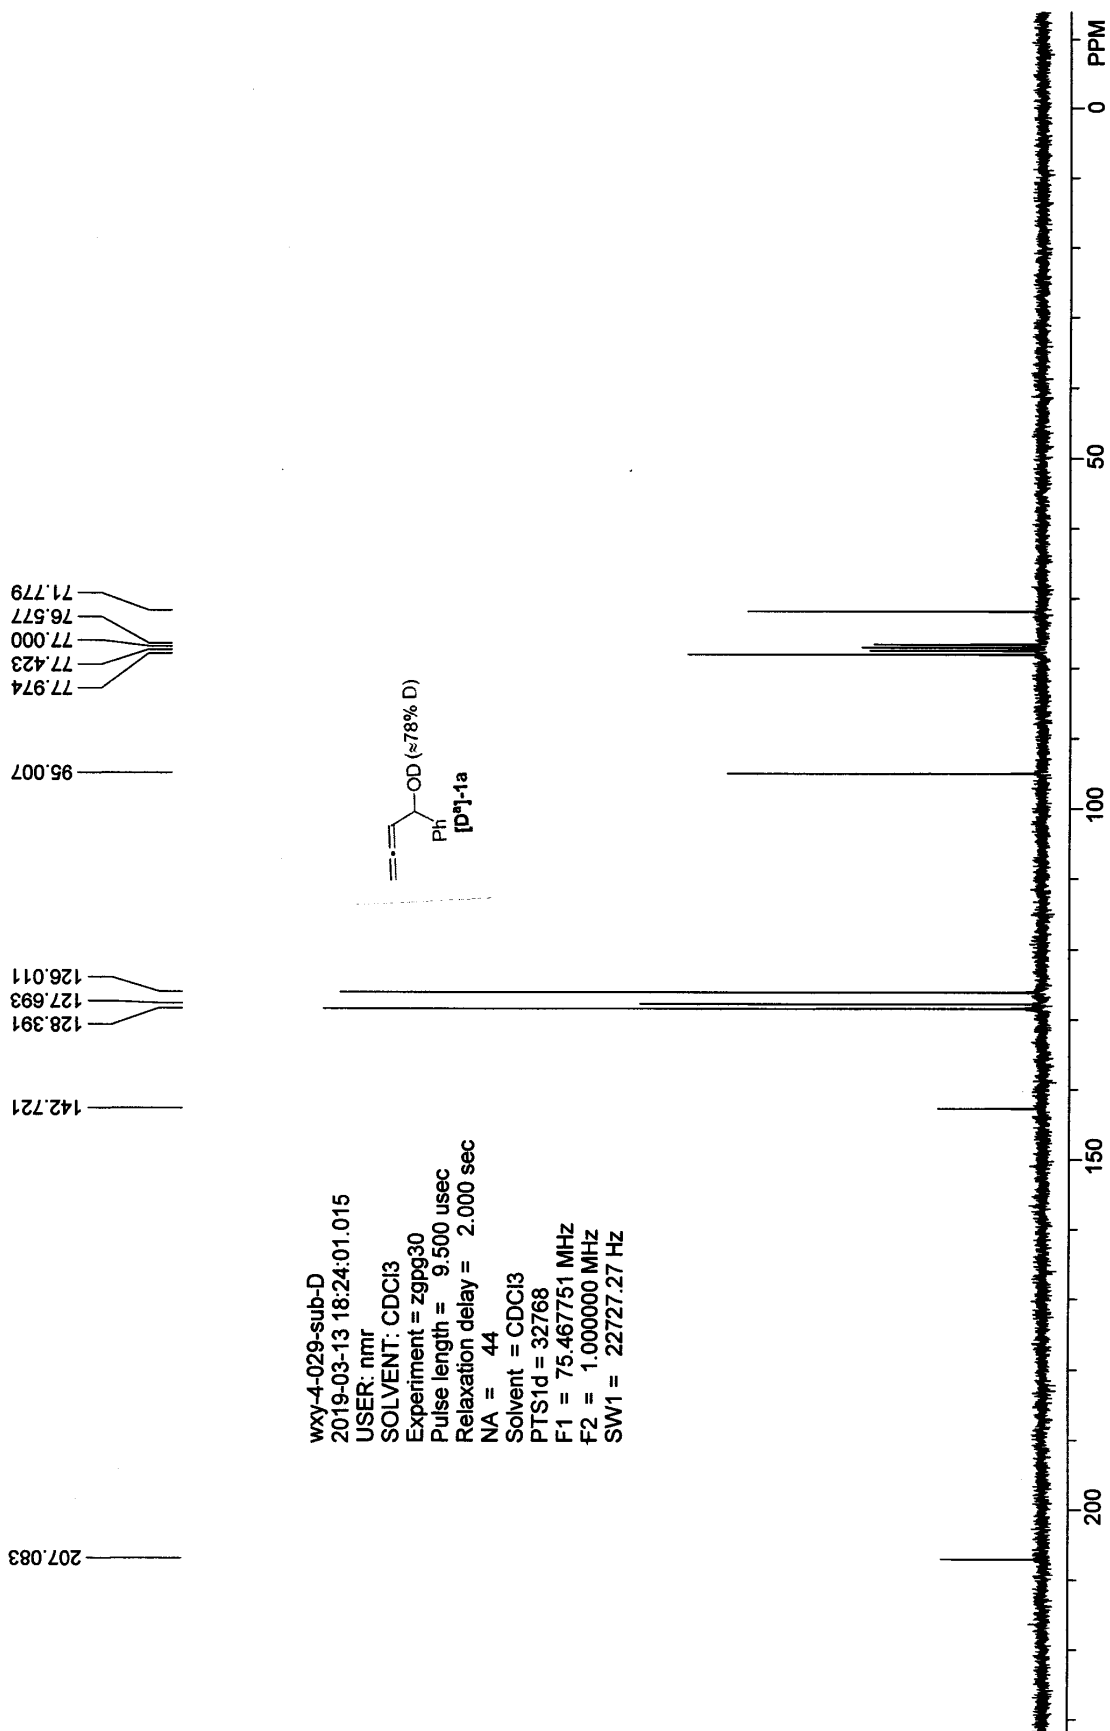

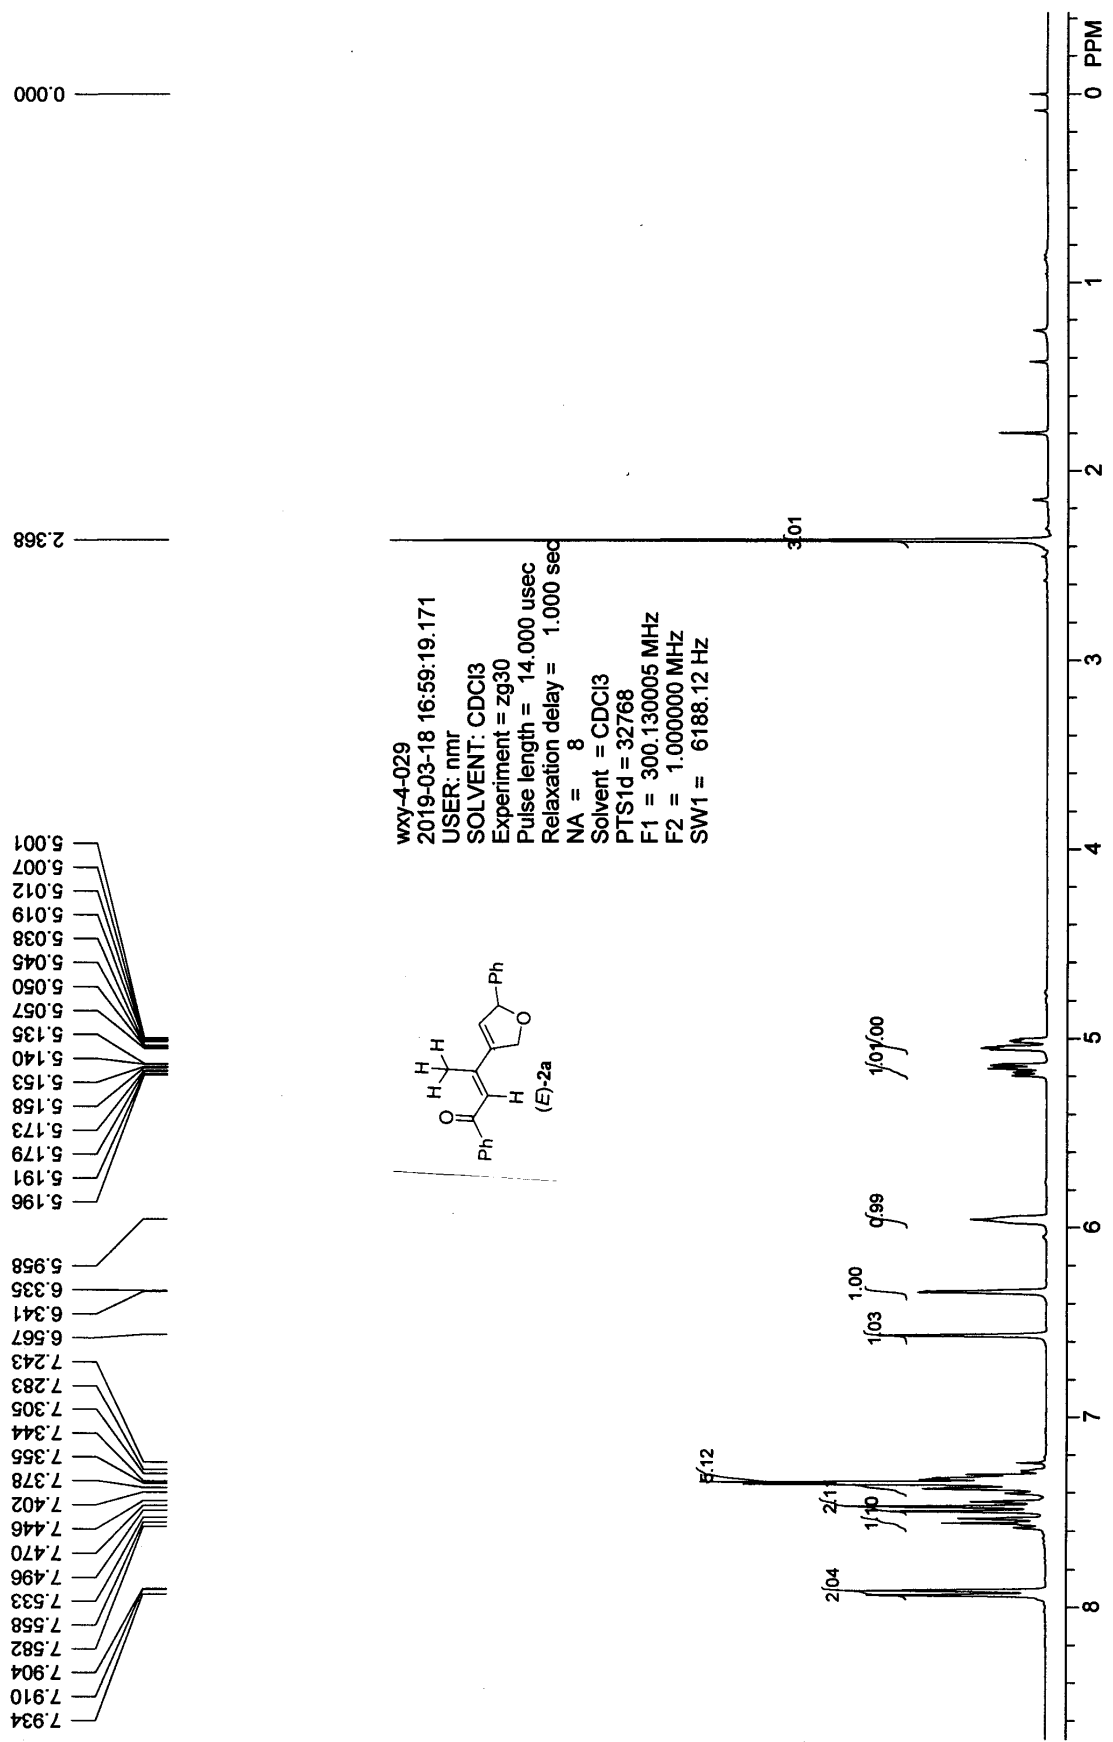



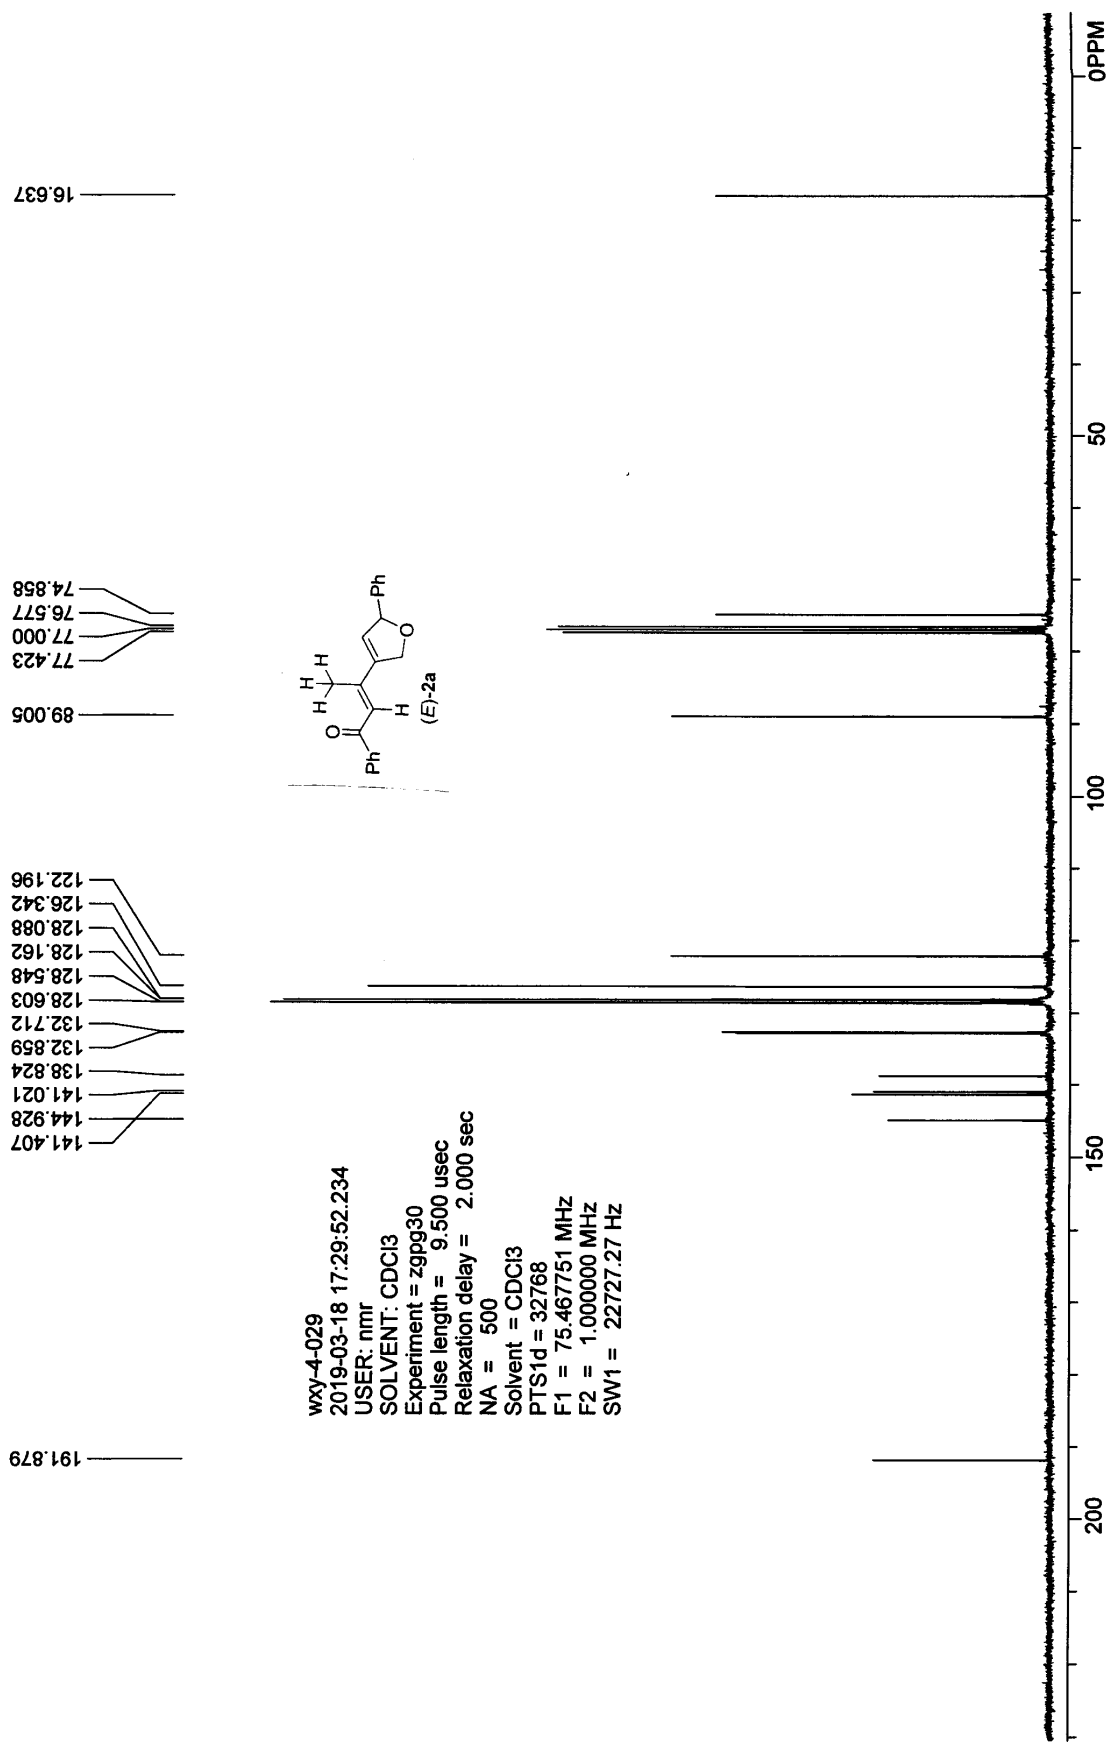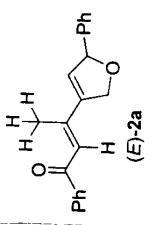

wxy-4-029  
 2019-03-18 17:29:52.234  
 USER: nmr  
 SOLVENT: CDCl3  
 Experiment = zgpg30  
 Pulse length = 9.500 usec  
 Relaxation delay = 2.000 sec  
 NA = 500  
 Solvent = CDCl3  
 PTS1d = 32768  
 F1 = 75.467751 MHz  
 F2 = 1.000000 MHz  
 SW1 = 22727.27 Hz

- 191.879
- 141.407
- 144.928
- 141.021
- 138.824
- 132.859
- 132.712
- 128.603
- 128.548
- 128.162
- 128.088
- 126.342
- 122.196
- 89.005
- 77.423
- 77.000
- 76.577
- 74.858
- 16.637

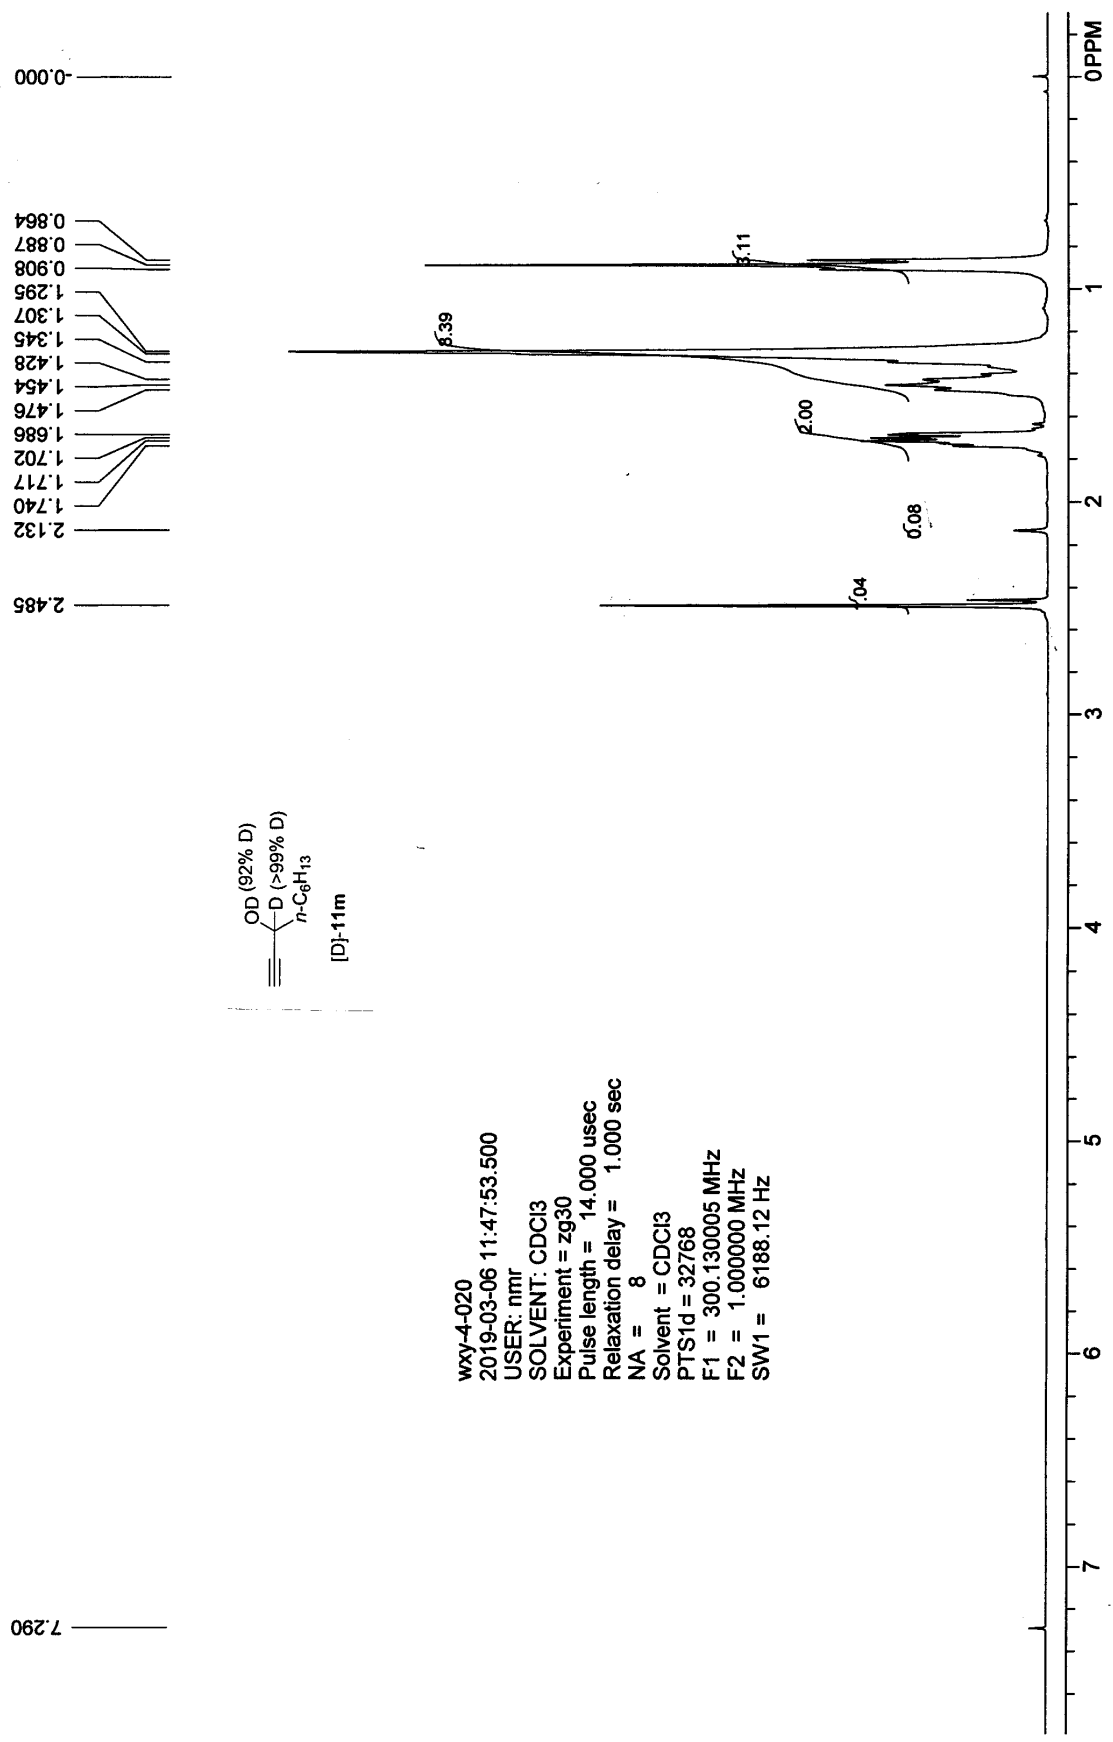

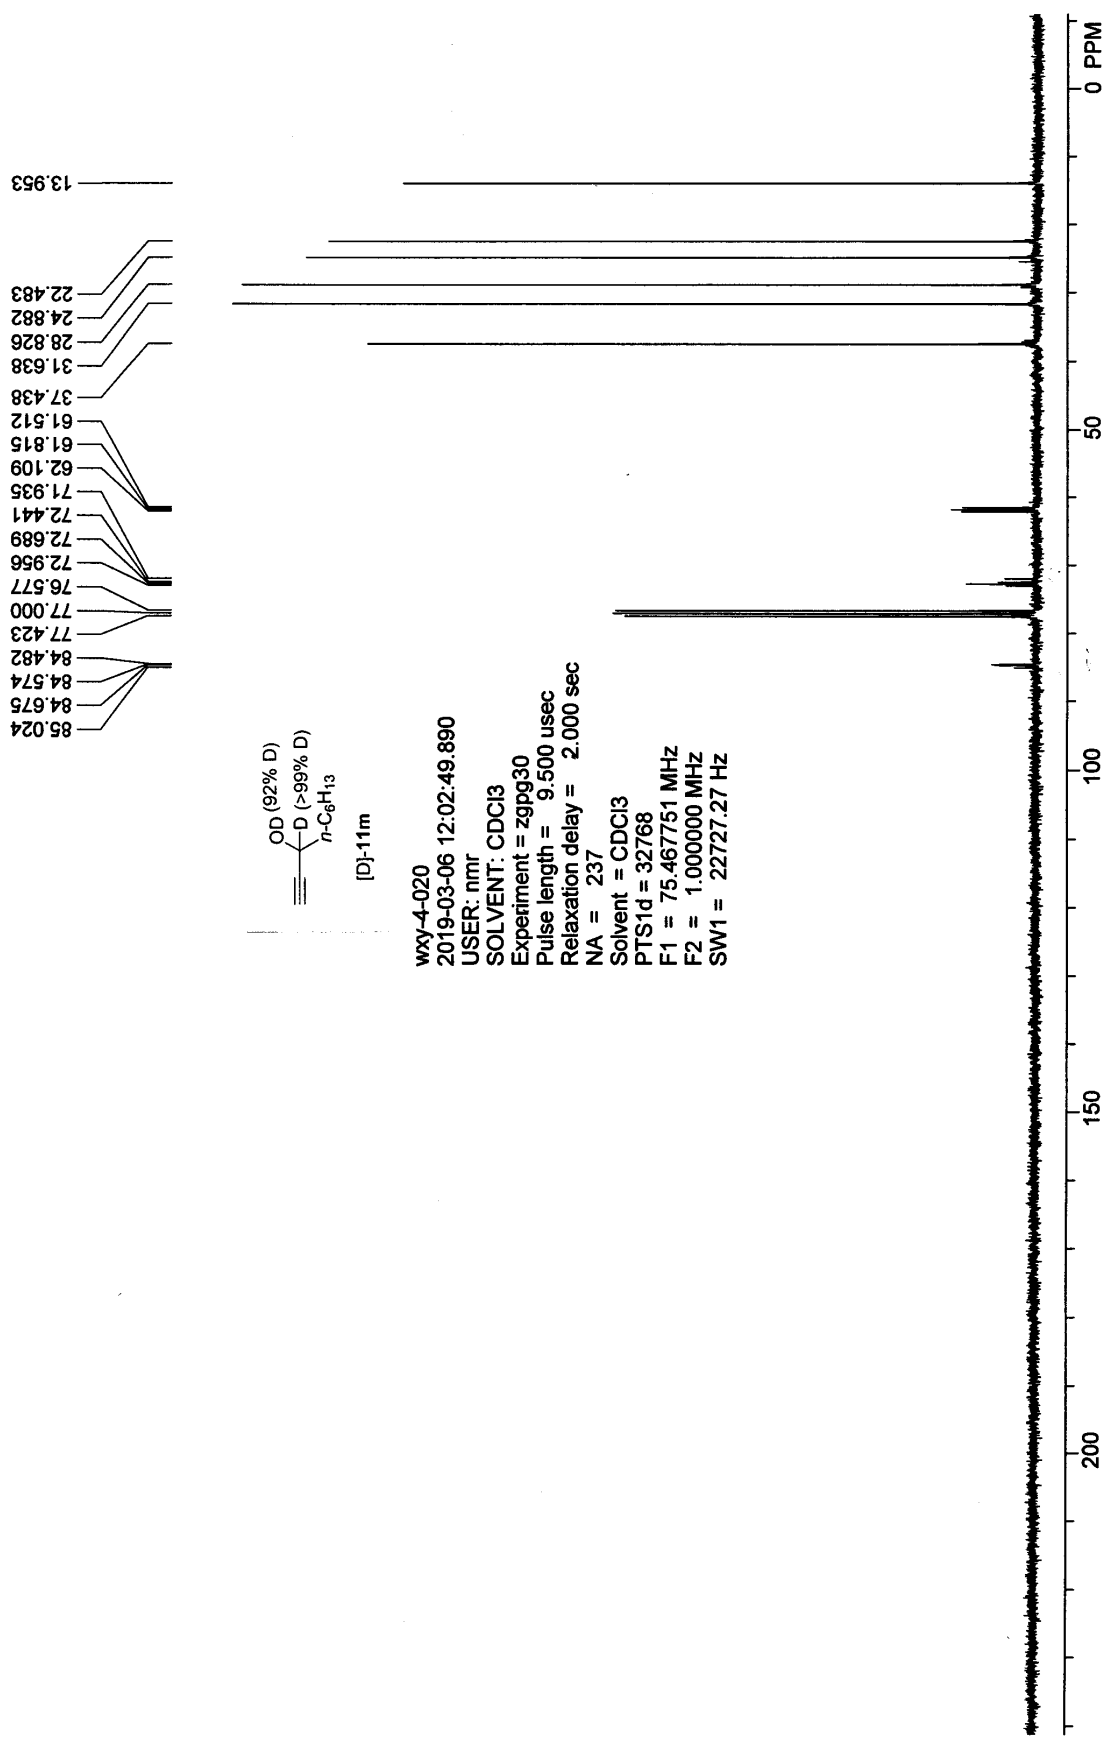

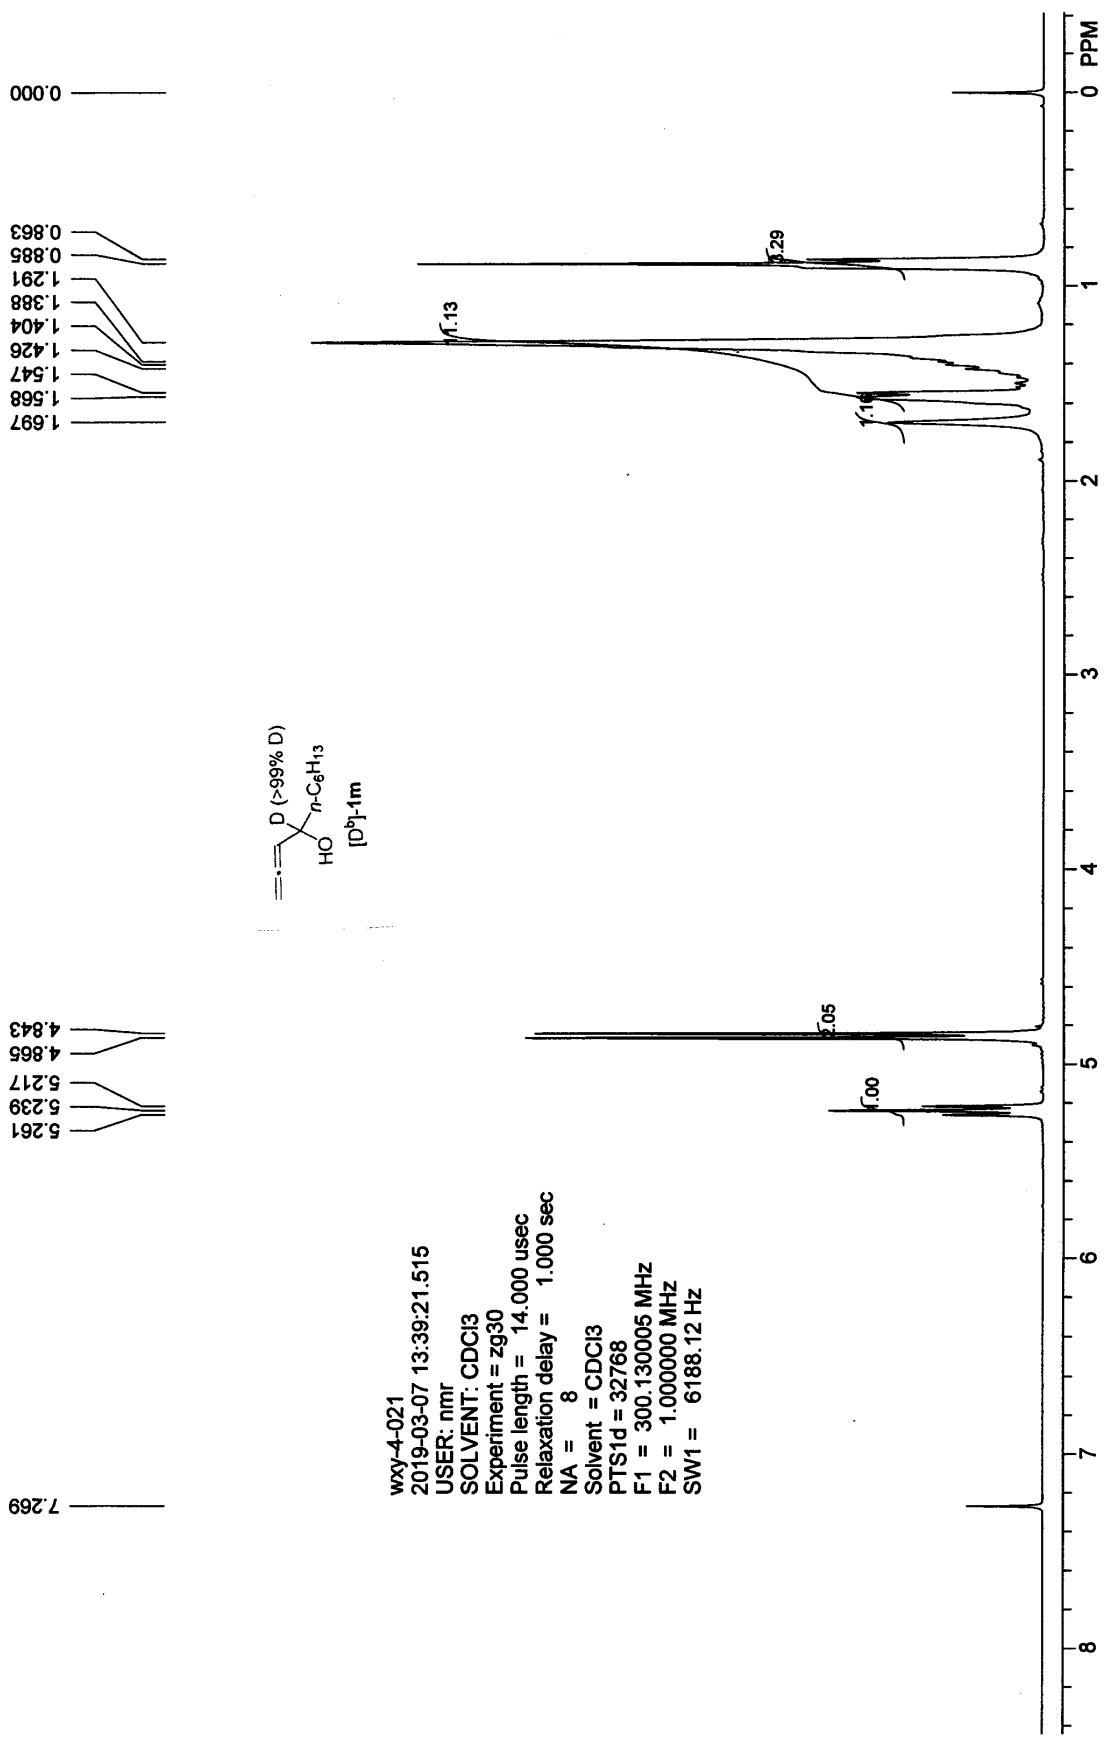

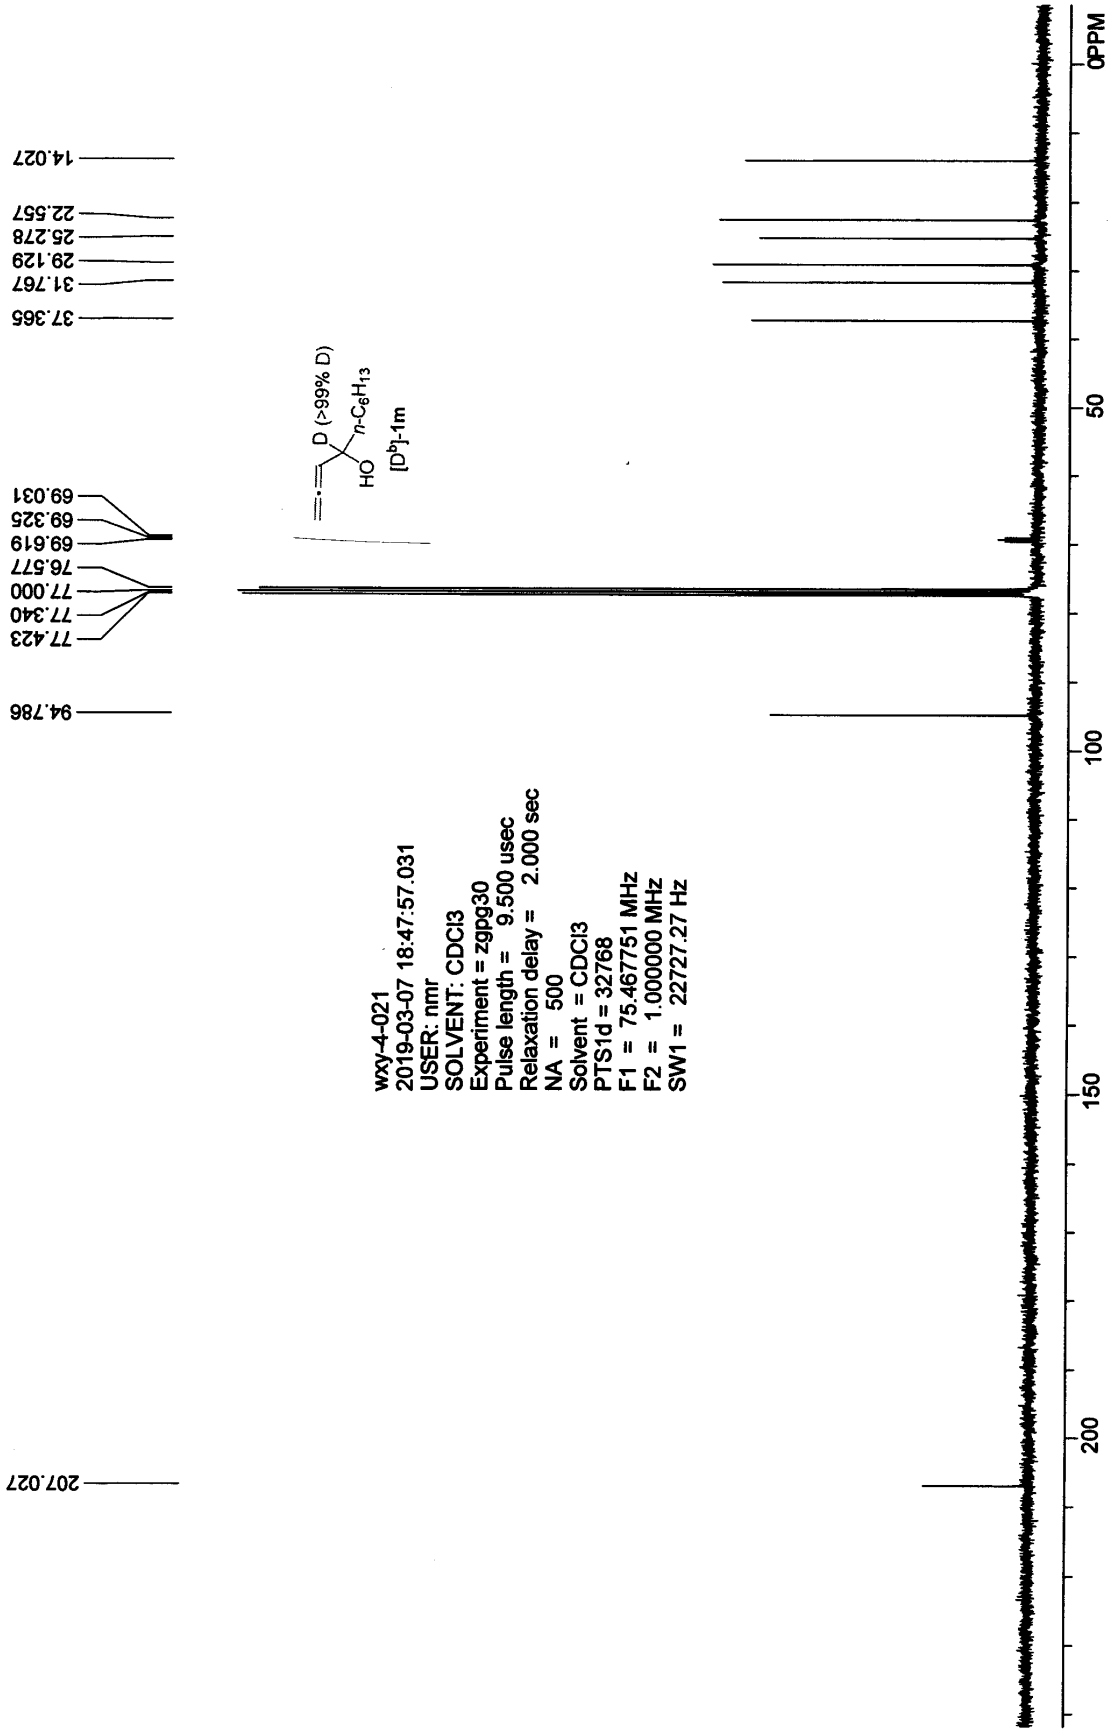

wxy-4-021  
 2019-03-07 18:47:57.031  
 USER: nmr  
 SOLVENT: CDCl3  
 Experiment = zgpg30  
 Pulse length = 9.500 usec  
 Relaxation delay = 2.000 sec  
 NA = 500  
 Solvent = CDCl3  
 PTS1d = 32768  
 F1 = 75.467751 MHz  
 F2 = 1.000000 MHz  
 SW1 = 22727.27 Hz

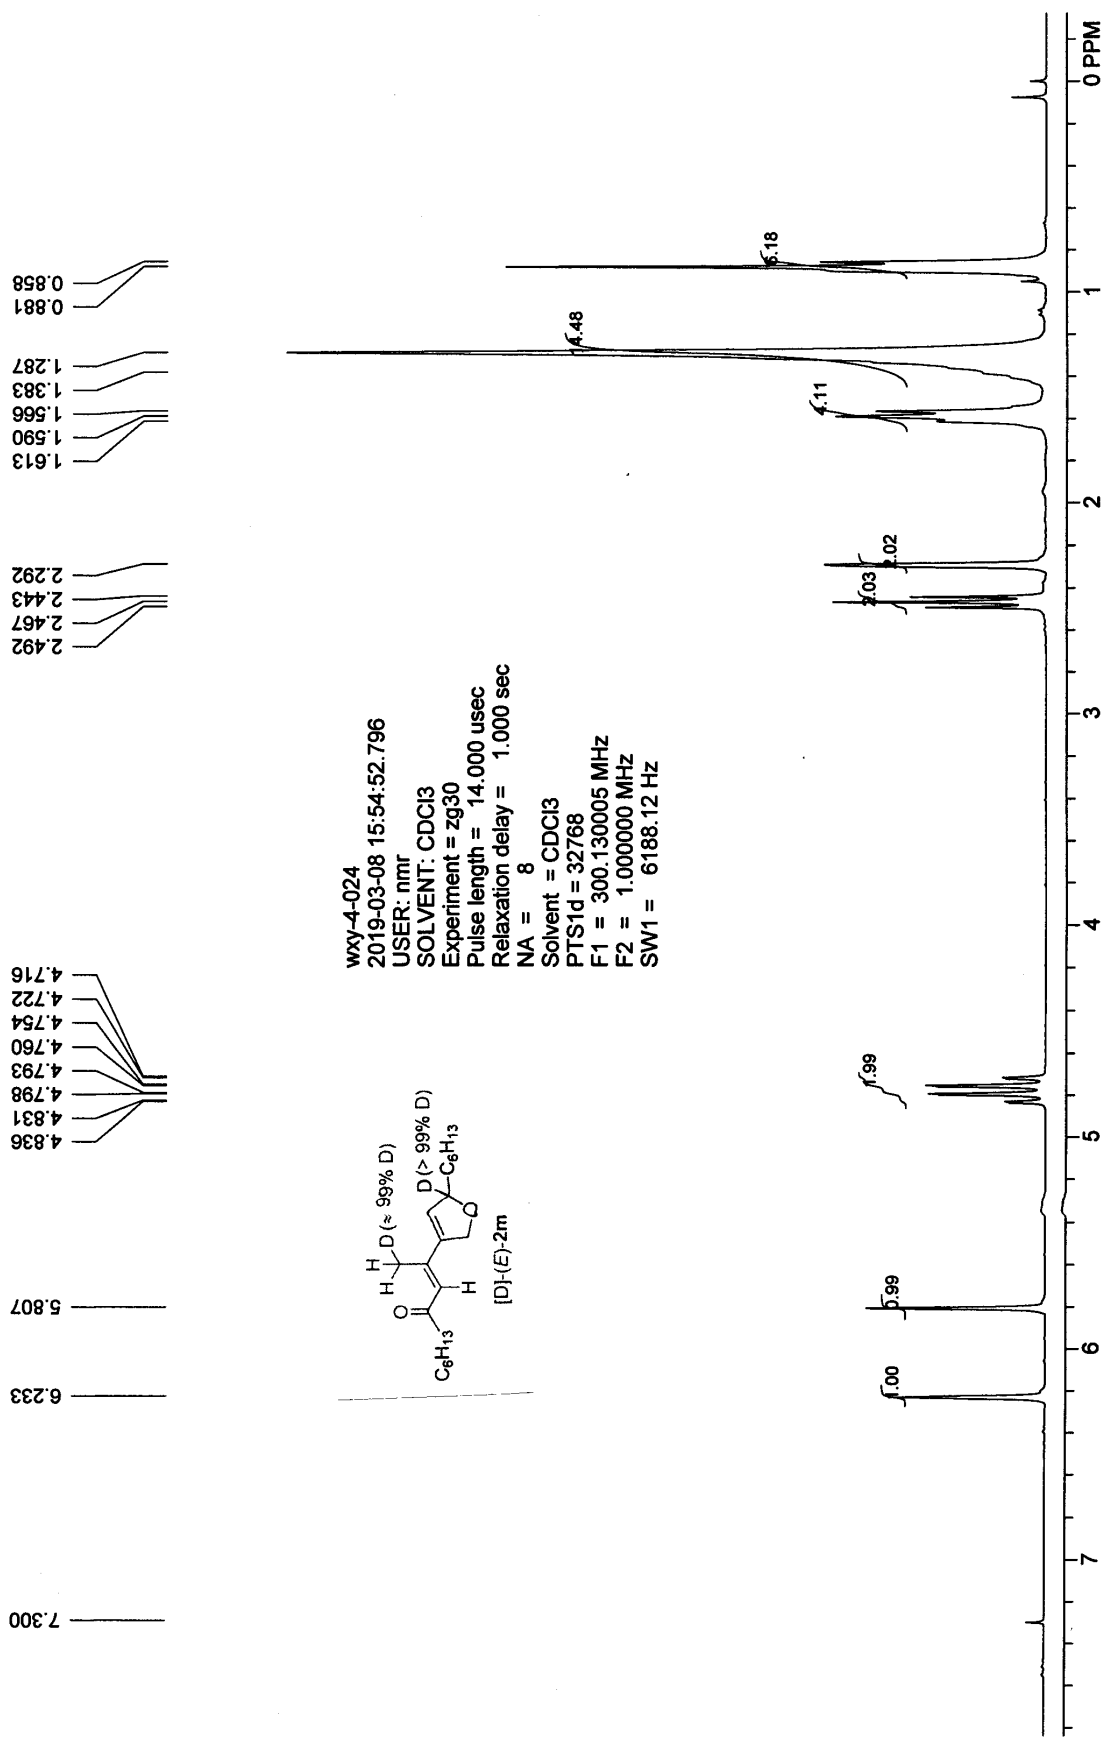

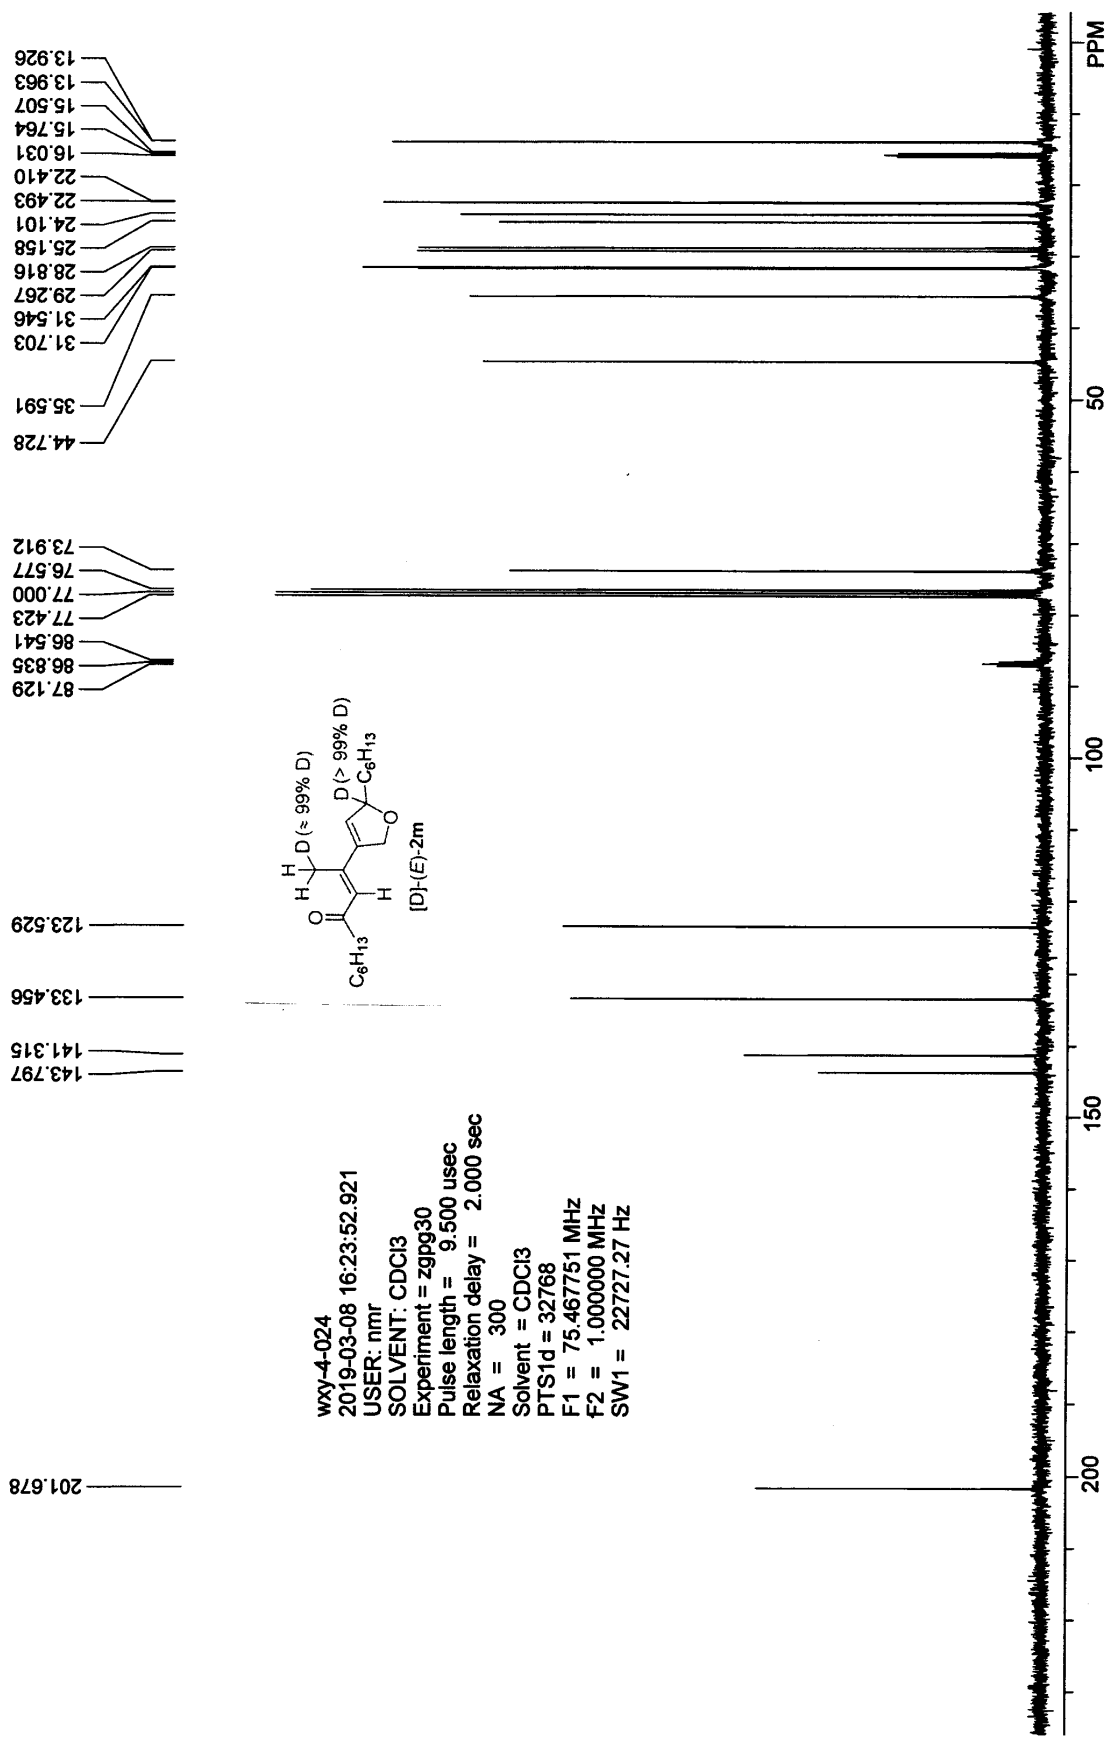

Supplement: d1qo00599e1.pdf [file d1qo00599e1.pdf]
